# Supplementary material for: Mapping imported malaria in Bangladesh using parasite genetic and human mobility data
Source: eLife journal article supplement (doi:10.7554/elife.43481), 2019-04-01
Supplement: supp [file elife-43481-supp-v1.zip]

Archive with 20 entries (20 files):
- elife_poa_e43481_Supplementary_File_6.csv
- elife_poa_e43481_Figure_1_figure_supplement_2.pdf
- elife_poa_e43481_Transparent_Reporting_File.pdf
- elife_poa_e43481_Supplementary_File_5.xls
- elife_poa_e43481_Figure_1_figure_supplement_1.pdf
- elife_poa_e43481_Figure_2_figure_supplement_1.pdf
- elife_poa_e43481_Supplementary_File_3.docx
- elife_poa_e43481_Figure_4_figure_supplement_1.pdf
- elife_poa_e43481_Figure_3_figure_supplement_2.pdf
- elife_poa_e43481_Figure_5_figure_supplement_1.pdf
- elife_poa_e43481_Supplementary_File_1.txt
- elife_poa_e43481_Figure_2_figure_supplement_3.pdf
- elife_poa_e43481_Figure_1_figure_supplement_3.pdf
- elife_poa_e43481_Figure_3_figure_supplement_1.pdf
- elife_poa_e43481_Figure_2_figure_supplement_2.pdf
- elife_poa_e43481_Figure_5_figure_supplement_2.pdf
- elife_poa_e43481_Supplementary_File_4.xlsx
- elife_poa_e43481_Figure_4_figure_supplement_2.pdf
- elife_poa_e43481_Figure_3_figure_supplement_3.pdf
- elife_poa_e43481_Supplementary_File_2.docx
