# Supplementary material for: Mapping imported malaria in Bangladesh using parasite genetic and human mobility data
Source: eLife journal article supplement (doi:10.7554/elife.43481), 2019-04-01

$0 \text{ km} \leq \text{Distance} < 7 \text{ km}$ 
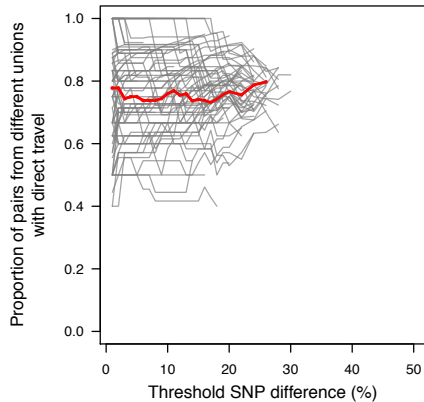
 $7 \text{ km} \leq \text{Distance} < 10 \text{ km}$ 
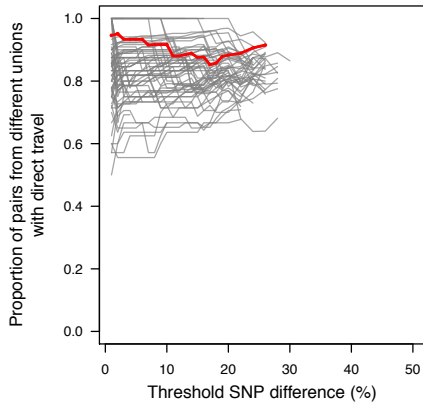
 $10 \text{ km} \leq \text{Distance} < 20 \text{ km}$ 
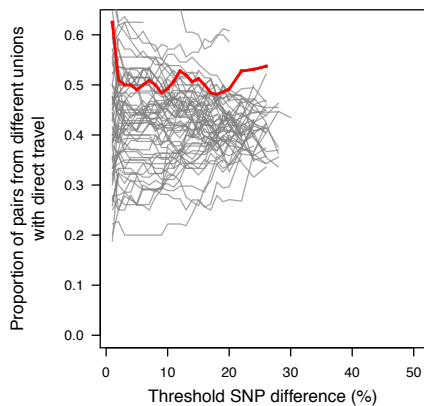
 $20 \text{ km} \leq \text{Distance}$ 
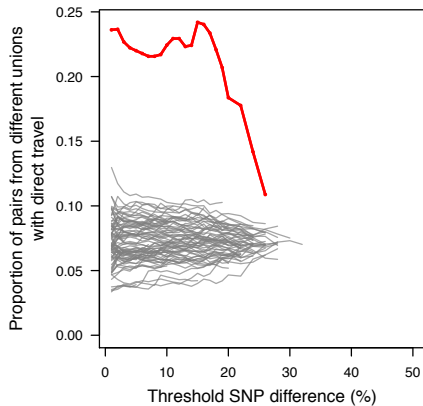

Supplement: supp [file elife-43481-supp-v1.zip › elife_poa_e43481_Figure_2_figure_supplement_1.pdf]
