# Supplementary material for: Mapping imported malaria in Bangladesh using parasite genetic and human mobility data
Source: eLife journal article supplement (doi:10.7554/elife.43481), 2019-04-01
Supplement: supp [file elife-43481-supp-v1.zip › elife_poa_e43481_Supplementary_File_1.txt]

Division	District	Upazila	Union	genetic_mixing_index
Chittagong	Bandarban	Alikadam	Alikadam	0.0636 [0.0318, 0.1272]
Chittagong	Bandarban	Alikadam	Chokhyong	0.2299 [0.1115, 0.4738]
Chittagong	Bandarban	Bandarban Sadar	Bandarban	0.0348 [0.0058, 0.2074]
Chittagong	Bandarban	Bandarban Sadar	Swalak	0.0568 [0.0115, 0.2803]
Chittagong	Bandarban	Lama	Aziznagar	0.2045 [0.0885, 0.4727]
Chittagong	Bandarban	Lama	Fasyakhali	0.1646 [0.0149, 1.8154]
Chittagong	Bandarban	Lama	Gajalia	0.0624 [0.0319, 0.1220]
Chittagong	Bandarban	Lama	Lama	0.0252 [0.0151, 0.0420]
Chittagong	Bandarban	Lama	Rupshipara	0.0719 [0.0437, 0.1184]
Chittagong	Bandarban	Lama	Sarai	0.0797 [0.0415, 0.1531]
Chittagong	Bandarban	Naikhongchhari	Dochhari	0.1726 [0.0732, 0.4069]
Chittagong	Bandarban	Naikhongchhari	Ghandung	0.0061 [0.0015, 0.0253]
Chittagong	Bandarban	Naikhongchhari	Naikhongchhari	0.1350 [0.0695, 0.2623]
Chittagong	Bandarban	Rowangchhari	Nowa Patang	0.1640 [0.0171, 1.5734]
Chittagong	Bandarban	Ruma	Ghalangya	0.2561 [0.0813, 0.8064]
Chittagong	Bandarban	Ruma	Ruma	0.0842 [0.0099, 0.7177]
Chittagong	Bandarban	Thanchi	Thanchi	0.0021 [0.0002, 0.0195]
Chittagong	Chittagong	Fatikchhari	Harwalchhari	0.0041 [0.0007, 0.0229]
Chittagong	Chittagong	Lohagara	Padua	0.1244 [0.0114, 1.3581]
Chittagong	Cox'S Bazar	Chakaria	Bamo Bilchari	0.1939 [0.0568, 0.6613]
Chittagong	Cox'S Bazar	Cox'S Bazar Sadar	Bharuakhali	0.1673 [0.0105, 2.6716]
Chittagong	Cox'S Bazar	Cox'S Bazar Sadar	Idgaon	0.3697 [0.0618, 2.2104]
Chittagong	Cox'S Bazar	Pekua	Taitong	0.0268 [0.0025, 0.2926]
Chittagong	Cox'S Bazar	Ramu	Garjania	0.1090 [0.0596, 0.1991]
Chittagong	Cox'S Bazar	Ramu	Idgar	0.0444 [0.0129, 0.1522]
Chittagong	Cox'S Bazar	Ramu	Joarianala	0.0350 [0.0079, 0.1551]
Chittagong	Cox'S Bazar	Ramu	Kachhapia	0.0232 [0.0071, 0.0756]
Chittagong	Cox'S Bazar	Ramu	Kauarkhop	0.0331 [0.0099, 0.1111]
Chittagong	Cox'S Bazar	Ramu	Rashid Nagar	0.0698 [0.0073, 0.6709]
Chittagong	Cox'S Bazar	Ukhia	Haldia Palong	0.3733 [0.0339, 4.1076]
Chittagong	Khagrachhari	Dighinala	Babuchhara	0.0433 [0.0153, 0.1227]
Chittagong	Khagrachhari	Dighinala	Boalkhali	0.0621 [0.0088, 0.4404]
Chittagong	Khagrachhari	Dighinala	Kabakhali	0.0795 [0.0133, 0.4746]
Chittagong	Khagrachhari	Dighinala	Merung	0.0315 [0.0089, 0.1114]
Chittagong	Khagrachhari	Lakshmichhari	Barmachhari	0.0143 [0.0016, 0.1279]
Chittagong	Khagrachhari	Lakshmichhari	Dulyatali	0.0115 [0.0026, 0.0512]
Chittagong	Khagrachhari	Lakshmichhari	Lakshmichhari	0.0110 [0.0038, 0.0318]
Chittagong	Khagrachhari	Manikchhari	Manikchhari	0.0692 [0.0063, 0.7593]
Chittagong	Khagrachhari	Matiranga	Belchhari	0.0405 [0.0037, 0.4463]
Chittagong	Khagrachhari	Matiranga	Gumti	0.0628 [0.0039, 1.0030]
Chittagong	Khagrachhari	Matiranga	Matiranga	0.0121 [0.0027, 0.0545]
Chittagong	Khagrachhari	Panchhari	Ulta Chari	0.0055 [0.0013, 0.0238]
Chittagong	Khagrachhari	Ramgarh	Ramgarh	0.2549 [0.0285, 2.2781]
Chittagong	Rangamati	Baghai Chhari	Baghai Chhari	0.0352 [0.0032, 0.3842]
Chittagong	Rangamati	Baghai Chhari	Sajek	0.0643 [0.0202, 0.2047]
Chittagong	Rangamati	Barkal	Barkal	0.0178 [0.0011, 0.2830]
Chittagong	Rangamati	Rajasthali	Ghila Chhari	0.0018 [0.0002, 0.0138]
Chittagong	Rangamati	Rajasthali	Gainda	0.0413 [0.0026, 0.6562]
