# Supplementary material for: Mapping imported malaria in Bangladesh using parasite genetic and human mobility data
Source: eLife journal article supplement (doi:10.7554/elife.43481), 2019-04-01
Supplement: supp [file elife-43481-supp-v1.zip › elife_poa_e43481_Supplementary_File_2.docx]

**Supplementary file 2. Questions in the travel survey**

| - Residence - Place of work - Have you visited the forest in the previous 2 months? If yes, where did you go? - Have you been to another country in the previous 2 months? If yes, where did you go? - Did you frequently travel to another village/town/city for a purpose other than work? If yes, where did you go? - Other than this regular travel, have you been to another village/town/city in this country for a purpose other than work in the past 2 months? If yes, where did you go? |
| --- |
