# Supplementary material for: Mapping imported malaria in Bangladesh using parasite genetic and human mobility data
Source: eLife journal article supplement (doi:10.7554/elife.43481), 2019-04-01
Supplement: supp [file elife-43481-supp-v1.zip › elife_poa_e43481_Supplementary_File_4.xlsx]

## Sheet: GRC
ID	Location	Barcode
548944	Lama, Soroi Union, AKOTA Office; Lama, Bandarban, Chittagong	AGTCAACATXGACCCCXAAAATGAGTAGCTTGTTACATCGAACTCAAAAAXAGXCGGAXACTAGCGCCXACXCXXGGGCTCTAAACATCCNCACTANGXNT
548947	Lama, Soroi Union, AKOTA Office; Lama, Bandarban, Chittagong	GAXTGGTXTXAAXCCGTAAAATTAATACCTTATCTTAATCCTTTTATAXXXAGXCGTGXATXGACGATGTCXCXXGGGCTCGAAATATTCCCGCTTCAXGT
548949	Lama, Soroi Union, AKOTA Office; Lama, Bandarban, Chittagong	AAXCGACXTXGATCTGTAXXXXXXXXXXXXXXXXXXXXXXXXXTTAAAXXXAGACAXAXACXGAXAACXTXXCXXGAGCTCGAGCCGXTACCGCTACAXGC
548958	Lama, Soroi Union, AKOTA Office; Lama, Bandarban, Chittagong	GAXTAATGCXGATCCGXAAAAGTGGTGCCTXAXCTTGTTGCTTTCATACAXGGXTATAXATTGGXGCCATAXCXAXAXTCAGAAXXAATACCACTATAXGX
548960	Lama, Soroi Union, AKOTA Office; Lama, Bandarban, Chittagong	AGXCAATGTXGACGTGCGTCAGTAGCAGCTTGTCTCAATGCATACAXGAAXAXXTGGAXCCTGAXGCXGTCACCAAGGCTCTAAATAACACCATTACAGAT
548961	Lama, Soroi Union, AKOTA Office (2); Lama, Bandarban, Chittagong	AGXCAGXXTGAACXXCXAXAAXTGGTXGCCTACCAXAACCATTTCATAAXXGAXCGGGXACXAATXATAAAXCXXAGGTCAGAAACGACCTTGCTTCAXGT
548962	Lama, Soroi Union, AKOTA Office; Lama, Bandarban, Chittagong	AATCAGCGCXXACCCGTAAAAGXAGTACTTAACTTTGACGCATTTGTAAAXAGXTGTAXATXGGCACXATAXCXCAAGTTAXAAACAACATCGTAACAXGT
548963	Alikadam Upazila Health Complex; Alikadam, Bandarban, Chittagong	NGNXANTATXGNNCNGTATXNXTGGTGGNCTNCNTNAACXCNNANANNAAGNAACAGAGNNTAANNCTGNACCNANGNTNAXAGACNXCANNNNNXNGNNT
548964	BRAC (BHP)-Naikhongchhari; Naikhongchhari, Bandarban, Chittagong	AGTCGACGCXGATCTCCATATTTAACACTTTGCCTTATCGCATXTATAAAGAGACAGAXACTAGCGCTGACCCXCAGGTCATAAACGACACCGCTACGAGT
548965	Alikadam Upazila Health Complex; Alikadam, Bandarban, Chittagong	AAGXAGTGTXGACCCGXNTXAXTNGTGGCCTGCTTTAATXATCTNAANAGGAAACGTAXACTAATACCNTANCTNAACTTAXANACGXCCTCACTXCGNGT
548970	Sindukchhari BRAC Laboratory Office (2); Mahalchhari, Khagrachhari, Chittagong	GGGXAATATXAACGTGCAAXAGTGGCACCCTGTCACGATXCACATAAAAGGAGACGGACACTAACGCCGAAAGTCGGGCTAXAAACGXCATCACTTCAAGT
548972	BRAC (BHP) -Lama; Lama , Bandarban, Chittagong	GGXCAGCXNXGACXCNXXXAAXXGGCXNCCNGTCTXNXNGCTTXNATACXXAGXCNTAXACXAACGACATCXCXXNXGNTAGANANNNNACCNNTATAXGN
548978	Lama Upazila Health Complex; Lama, Bandarban, Chittagong	GAXCGGCXTXGGTCXGTAXCAXXGGXACTTTATCAXAXCGCATXCATAXXXAGXCGXAXACXAACXCTXTXXCXXGGCCCCTAGACGATACTGCTACAGGT
548980	Ramu Upazila Health Complex; Ramu, Cox's Bazar, Chittagong	AGXCANCATGGNNXTNTGXAAXXGNTGNCCNNNCAXAXCCCTTXTANXXXXGGXCGXAXACXGACXCCGACXNXXXGGTXCGAGACGXTXCXGXTTXGXNX
548981	BRAC (BHP) -Lama; Lama , Bandarban, Chittagong	AGXCAACXTXNNCCCGXAXAAXXNGCANCCNNNNTXAACGNATACANNAAXANXCNGNXACTGACNCTNNCXCXCNGCTNNXANCNNTCANCNCAACNXAN
548982	Lama Upazila Health Complex; Lama, Bandarban, Chittagong	GGGTNATATXNANGNGCGTAATGNATGGNCNGNNNXGXCNCANXTATGAGXAGXCGGNXATTNGCNNNANCXCXXAGGTXAXANACANCXCTXCTATNXGT
548984	Lama, Soroi Union, AKOTA Office; Lama, Bandarban, Chittagong	GGXTAACXTXAATGTGXGTAAXGNATGGTCTGCNNXAXCNCANXTATGXXXAGXCGXGXCTXAGXXCCATAXCXXAGNTCAXANACANCACTGCTATNXNT
548985	BRAC (BHP) -Lama; Lama , Bandarban, Chittagong	NGXCGGTGNXNATGTNTAXCAGXGGTGCTCTNTCATAXCNCNXTTATACXXGGXCGXGXANXAGXXCCATCXCXXGGGTCANANANNANATNANTATAXGC
548986	Bandarban Cantonment (MDS); Bandarban Sadar, Bandarban, Chittagong	XXXXAXXACXXXTXXGXXXXXXXXACXXXXAGXXXTXXCXAXTTCXAXCXAAXXXAGXXXXTXGCGXCGXAXXXXGAXCTAXXGXTGXCXXCGXXXXXAXC
548988	Lama Upazila Health Complex; Lama, Bandarban, Chittagong	XXXXXXXXXXXXXXXXXXXCAGTGGCAGCTTGTCTCAXTGCATTCATAAAXAGXTAGAXCCTGGCGACATCXCXAAAGCCCGAAATAACACCATTATAGAT
548990	Lama Upazila Health Complex; Lama, Bandarban, Chittagong	GGXCAATGTXAGCGTCTAACAGTAATGCCCAATCTTGATGATCATAAACGXAGXCGTAXACTAGTAACAACACTAAAGTTAXAAATATCCTCATTACAGAT
548994	Lama, Soroi Union, AKOTA Office (2); Lama, Bandarban, Chittagong	GGXTNNNXNGNANXCGTAXXAXXGNTGGTTNNTCNXAXNCNNTTTATAXXXAGXTAXNXACXANTXNTGACXGXXGGNCCAGANANAANATTACTACNAGT
548995	Ramu Upazila Health Complex (1); Ramu, Cox's Bazar, Chittagong	AGNCAGCGTXAANCCNCATAAGTAXTACXTAAXCACATCCXAXXCXAGAXAAGACXXXXXCTXACACCAXCXXXXXGXXXXXXXXXXAXXXXXXTXXXXXT
548997	Lama, Soroi Union, AKOTA Office; Lama, Bandarban, Chittagong	GAGCAATGTXGXTCCGTATAAGGGGCGCCTTGTCTCGTTGAXTTTATACAXAGXCATAXACTGATGACATCCCXAAAGTTAGAAATGACACCATTATAXGT
548999	Lama, Soroi Union, AKOTA Office; Lama, Bandarban, Chittagong	GGGCGGXATXAACCCGTGTAAGTAGTAGCTTATCACAXTCCATXTATGAAXAGXTAXGXACAAAXGATATCXGXXGGGCCAGAAATAXCATTGCTACAGGT
549001	BRAC (BHP) -Lama; Lama , Bandarban, Chittagong	GAXTAACATXGATGCCXATAAGTAGCGGCTAACCTTGACCCATTTATGAGXAAXCGGGXATTGATACCATAXCXXGACTTAXCAACATCACCATTACGXGT
549002	BRAC (BHP) -Lama; Lama , Bandarban, Chittagong	NGXCGGNGNXNATGTNXATCAGGGXNGCTCTAXCATAXCNCAXTTANACAXGGXCNNGXANTAGNGCCATCXCXAGGGTCAGAGANNANATNACTATAXGC
549003	Lama, Soroi Union, AKOTA Office; Lama, Bandarban, Chittagong	GGNCGANATXAACCCCCAAANGTGGNXGCCAGCNACATTGCNTTCATNAAXAGXCGTNXCCTAGCACTGTACCCAGGGTCCTAAACAACCTCGTTNCGGAT
549005	Bandarban District Hospital; Bandarban Sadar, Bandarban, Chittagong	GGXTAATXTGGACGTCXAXCAGXGGCGCCTAATCAXAXTGATTXCATGAXXAGXCAXGXACXGGXXCTATXXGXXGAGCTAGAAACAATCTCGCTACAXGC
549007	Lama, Soroi Union, AKOTA Office (2); Lama, Bandarban, Chittagong	AAXNAATACGAATGTCTGXCAXXGGTGNCCNNNNTTGXTCNTCXNAAACAXGGXTGTNXCCXANNACNGNAXGXXGNGNCCXAAANNACATTGTTANANGT
549008	Lama, Soroi Union, AKOTA Office; Lama, Bandarban, Chittagong	AAXCAGTACXGATGCGTAACTGTGGCGGCTAGCCTTAXCGCATXTGTGAXXAGXTGXGXATXAACXATGTCXCXXAGGCTCGAAACAATCCCGCTATAXGT
549009	BRAC (BHP) -Lama; Lama , Bandarban, Chittagong	AAXTGANATXGATGCGTNXNAGXNGCGXCCNGCNNTAXNCCNCXCGNACGXAAXCGXAXATXGGCAATATAXCXXNAGTCAGCGACGTNCTNNCTACNXGT
549010	Lama, Soroi Union, AKOTA Office; Lama, Bandarban, Chittagong	GGXTAATGTXXGTCCGXGACAGTGGCXCCCAATTACGXCCCAXATATGAAXAGXCGGAXATTAACGCTGACXCXCGGGTCCTAAATGACCTCGCTACGGGT
549011	Bandarban District Hospital; Bandarban Sadar, Bandarban, Chittagong	GAXTAACXTXAACGTGXAXXAXXGGCXGCCTATTAXAACGCTCTCATGAAXAGXCGTGXATXGGTAACGTCACXXAGGTCCXAGATGACXCCGCTACAXAT
549014	BRAC (BHP) -Lama; Lama , Bandarban, Chittagong	GGXCGATATXGATGCGTGXAATTGGCACCTTGCCATATTGCTCXTGTACGXAGXCAXAXACXGGCGAXATCXCXCGGCTTAXAAATGACACCGTTTCAGGT
549015	Lama, Soroi Union, AKOTA Office; Lama, Bandarban, Chittagong	GAGCAATGTXGATCCGTATAAGGGXCGCCTTGTCTCGTTGXTTTTATACAXAGXCATAXACTGATGACATCXCXAAAGTTAGAAATGACACCATTATAGGT
549024	Lama Upazila Health Complex; Lama, Bandarban, Chittagong	GNXCGACGTXGACGCGCAXXXXXXXXXXXXXXXXXXXXXXXXXTTAAXCAXNGXCGXNXACXAACXCTGNAXCXXGNNNCAGANATNACATCGCTACGXGT
549025	Alikadam, Chokhyong Union, AKOTA office; Alikadam, Bandarban, Chittagong	XXXXXXXXXXXXXXXXXXXXAXXGGTGGCTTGCCTXAATCAATTTAAGAGXGGXTGGAXATXAGCGCTATAXCXAGGGTCCXAAATAACXCTGCTACAGAT
549028	Lama, Soroi Union, AKOTA Office (2); Lama, Bandarban, Chittagong	GGXTAGTGTGAGCXCGTATXAGTAGCXGTCAGCCATAXCGAATXXXXXXXXXXXXXXXXXXXXXXXXXXXXXXXXGGGTTAGAAACAACXTCATTACAGGT
549030	Lama, Soroi Union, AKOTA Office (2); Lama, Bandarban, Chittagong	AAXCGATGTGAATGTGXGXAAGTGGTGGTCAGCCATAXCGCAXXXXXXXXXXXXXXXXXXXXXXXXXXXXXXXXXXXXXXXXXXXXXXXXXXXXXXXXXXX
549031	Lama, Soroi Union, AKOTA Office; Lama, Bandarban, Chittagong	XGXCAXXXTXAXXXXGXXXXAXXGGTXXTTTXXCXXAXCGCXXTTAAXXXXXGXTGXAXACXGGXXCCATXXXXXXXGTTAGXXACXACACCXCTAXAXXX
549032	Lama, Soroi Union, AKOTA Office (2); Lama, Bandarban, Chittagong	GGGTGATATXAATGCGTATAAGGGGCXGCCTATTACAXTCCATTTATGCGXGAXTGGAXATXAGCACCGTAXCXXGAGTCCGAGACGACATTACTTTAAGT
549034	Lama Upazila Health Complex; Lama, Bandarban, Chittagong	AAGCGATGTXGGCCCGCANAAGXGGCGGNTNGTTAXAACCCTTXTATACGXGGXCGTGXATAGACACTGTACCXCAAGTCAXAAACATTCCCGCTACGAGT
549035	BRAC (BHP) -Lama; Lama , Bandarban, Chittagong	AATCAGTNNXNATCCGTNTAAGTNGCGCTCTGCTNTGXCNCAXACANGCAXGAXTNGAXNCTGGCNCCNTNXCXCGANTTCGAACTAACCCNGCTATGXAN
549036	Alikadam Upazila Health Complex; Alikadam, Bandarban, Chittagong	GAGXAGCGCXGATGCGTGAXAGTAGTACCTAGCCTTGTCXCATTTGTACGGAAATGGGGACTAACGATGAACCTXGGGCXAXAGATAXCCCCGCTXCAAGT
549037	Alikadam Upazila Health Complex; Alikadam, Bandarban, Chittagong	GGTXAGCGTGGATGTXCGTAATTGXCGCXTAGCXATAAXCAAXXCXTGCXXAGGTGGAXAXTXGCACCGTXCCXAXACXXCXXXXCGATXXXAXTACXGXT
549039	BRAC (BHP) -Lama; Lama , Bandarban, Chittagong	AGXTAAXXTXAACCCGTAXXAXXAGTXGCCAACCTXGXCGCATTTATACXXAAXCATGXACXAACACTGACXGXCGGGTCCXAAACATCACCGTAXCAXGT
549041	Alikadam Upazila Health Complex; Alikadam, Bandarban, Chittagong	GAXXAXCXCXGATGCGXGTXXXTXGXXCCTAGCXTTXTXXCATTTAXAXXXAAXXGXXXXXXXAXXATGAXXXXXXXGTTAXAXAXGXXXXCGXTXCAXXT
549042	BRAC (BHP) -Lama; Lama , Bandarban, Chittagong	XGXCAAXXTXXACXXCXXXXAXXAGCXNCCAXCCXXGANGCTCXCAAXXXXAGXTATAXANXXGXXATGTXXCXXAXGTXXXAGCTGACANCGTXXXAXGT
549045	Lama Upazila Health Complex; Lama, Bandarban, Chittagong	AXXCXXXXXXXXXXXGXAXXAXXXGXXGCTTGXCXXXXXCCXXXXGXXXXXXXXTGXXXXXXGAXXXCXAXXCXXNXCXXXTXXCXANXATCAXXATXXXC
549046	Lama, Soroi Union, AKOTA Office; Lama, Bandarban, Chittagong	GAXCAATGTXGATCCGTATAAGGGGCGCCTTGTCTCGXTGATTXXXXXXXXXXXXXXXXXXXXXXXXXXXXXXXXXXXXXXXXXXXXXXXXXXXXXXXXXX
549048	Lama Upazila Health Complex; Lama, Bandarban, Chittagong	AGTCGGCATXGACGCGCATAATTGGTXGNCTACCTXGACGAATXXXXXXXXXXXXXXXXXXXXXXXXXXXXXXXXGACCXCTAAATGATCTTACTACAAGC
549050	Alikadam Upazila Health Complex; Alikadam, Bandarban, Chittagong	AAGTAGTGTXGACCCGCGTAATTGXTGXXXXGCTTTAAXXXTCXCAAGAGGAAACGTGXACTAATACCATACCXAAACXTXXXXXCGAXCTXAXTACXAXT
549051	Ramu Upazila Health Complex; Ramu, Cox's Bazar, Chittagong	GGGNAGCGNXGACXCGTAXAAXXAGCGCTNTATNNXGXCGCACTTANGAAXGGXNGGAXXNAAACGNTGACXGXCAACTNAXAAANATCXCCATTANNANN
549056	Ukhyia Upazila Health Complex; Ukhia, Cox's Bazar, Chittagong	GATCAGTGTXAGTCCGTGTCATTAACAGTCTATCACATCGATTXCGAACGGAGGCAGAXACTGGTAACATACGXCGACTTCTAAACGACATCGCTACAGXT
549057	Lama Upazila Health Complex; Lama, Bandarban, Chittagong	XGXCXATATXAACXXGXGXAAXXXAXXCNTAGTXAXAXCGCXCTXXAXXXXXGATGXAXXCXNGTXCTAXXXCXXXXXXXXXXXXXXXXXXXXXXXXXXXX
549059	Bandarban District Hospital; Bandarban Sadar, Bandarban, Chittagong	GAXTAGCXTGGACGTCCAXAAXTGGCXCTTTATTAXGXTGCATACATAAAXAGXTGGAXACXAGCGCXGTCXCXCAGCCCAXAGATAXCACCGCTTCAXGT
549060	Alikadam Upazila Health Complex; Alikadam, Bandarban, Chittagong	ANTCANCNNXNANNCGTGXNAGGGGCNCTTTGXCNTNNCCAAXXTGTAAXNAGACATXXACTGACGCTGTCCCXXXAXXTXXXXXXXTXXTTXXTXXXAXT
549062	BRAC (BHP)-Naikhongchhari; Naikhongchhari, Bandarban, Chittagong	NNGCGGTGTXAANCNNTNANATGGGTACCTTGNTNCNTCCCNTXTATACAAAGATNNAXATNGATNCNNTCCCXAAGGCCCTAAATNACATCGTTANGNGN
549063	Bandarban Cantonment (MDS); Bandarban Sadar, Bandarban, Chittagong	GAXXAACGTXGXCCXXTXXXAXXGGXXXXTAXTCAXAXCXAXTTCXTACXXAGXTXXAXXCXGXTACXGXXACXCXXCXXCXXGATXXXXCCACTXXAXGX
549064	Bandarban Cantonment (MDS); Bandarban Sadar, Bandarban, Chittagong	GXTXAXXXXXGGTXTCXGTXXXXXXTGXXTXXXXAXXAXXAXXTCAAACXXAXAXXXAXXXXXGXXXXGTXCCXXXXGCXXXAXXCXXXAXXXXTXCAXXX
549065	Bandarban Cantonment (MDS); Bandarban Sadar, Bandarban, Chittagong	ANGXAGNGNXGGTNCGTGAXAGTGGCXCNNTNTCTCAACXCATXCXTGCAAAGGCGTAXACTGGXGAXXNCACCXGAGTCAXANCCNXTXNCGCTXTAXGT
549066	Bandarban District Hospital; Bandarban Sadar, Bandarban, Chittagong	AAXTAATXXXGACCCGTAXAAXXGGTXGCCTGCCAXAXTGAXCTTATGAAXGAXCGTGXACTAACGACGTAACXXGGGTCCGAAATGACACCGCTACAXGC
549067	Ramu Upazila Health Complex; Ramu, Cox's Bazar, Chittagong	AGXTNACGNGGANXCGXATATXGAGTXGCTNGNNTXAXCGAATTNNAACXXAGXCAGNXCNXAGTXCNNAAXCXXGGCTNAGAACCAACATCNCTACNAGT
549069	BRAC (BHP)-Naikhongchhari; Naikhongchhari, Bandarban, Chittagong	AGGTAACGNXAATGNGNGTAATTNGNGCCNTGTNACGACGCNNXTAANCANAGACGTAXACAAGCACCNXCXCXCGGNTTNNAGNNNTTANTNCTATANGT
549072	Lama Upazila Health Complex; Lama, Bandarban, Chittagong	XXXXXXXXXXXXXXXXXXTAAGNNGTANCCTACNACAATGCATTTATGNGXNGXTGNNXATAAGCANCGTAXCXXNANNCCGANATATNATNANTATAAGT
549073	Lama Upazila Health Complex; Lama, Bandarban, Chittagong	XXXXXXXXXXXXXXXXXXACAGGGGCGCCCTGCCTCGTTGAACACATAAAXAGXTATAXATTGGTAACATCXCXXGGGCTAGAACTGACATCACTATAAGT
549075	Lama Upazila Health Complex; Lama, Bandarban, Chittagong	AATCGACATXGATCTGTATAAGTGGTAGCTTGCCAXAACGCTTTTAAAAGXAGXCAGAXACTGATAACATCCCXXGAGCTCGAGCCGATACCGCTACAAGC
549079	Lama Upazila Health Complex; Lama, Bandarban, Chittagong	GGTCGAXATXGATGCGTGTAATTGGCACCTTGCCATAXTGCTCTTGTACGXAGXCAGAXACTGGCGACATCCCTCGGCTTAGAAATGACACCGTTTCAAGT
549084	Bandarban District Hospital; Bandarban Sadar, Bandarban, Chittagong	AAXTAAXXTXGACCCGXAXAAXXGGTXGCCTGCCAXAXTGAACTTATGAXXGAXCGTGXACXAACGACGTAXCXXGGGTCCGAAATGACACCGCTACAXGC
549085	Lama, Soroi Union, AKOTA Office (2); Lama, Bandarban, Chittagong	NNXTNACXCGGNCXCGTNXAAXXGGTXGCTTGTCTXAXNGCATTTAAGAXXAGXCGXAXATXGACXCTGTAXCXXAGGTTCGNAATGATACCGTTTTGAAT
549086	Alikadam Upazila Health Complex; Alikadam, Bandarban, Chittagong	GGTCAACATXGATCCGCATCAGTAGXACXTTATXACGACCXACXTAAAAAXAGACGGAXXTTAGTACCGTAACXCXGXXTXXXXXCGAXXXXXXTXTXGXX
549090	BRAC (BHP) -Dighinala; Dighinala, Khagrachhari, Chittagong	AGGCAACGTGGGCGCCCGAAAGGGXTGCXTAGXCTTAAXCAAXXXXAAAGAAAACAGXXXCTAGCAXTAXCAGXCAACXTCTXXCTXATXTXAXTACXXGT
549092	BRAC (BHP) -Dighinala; Dighinala, Khagrachhari, Chittagong	AGTNANTGTGGGTNCNNAXNANNGXTGCXTAACXTNGTCCAAXXCXTGAAAAGACAGXXXNTGACGCTGXAXCXAXAXCTNGXAXTNTTXTXAXNXTAGGT
549093	Ramu Upazila Health Complex; Ramu, Cox's Bazar, Chittagong	GGGCAATGCGAACXCCCNTAAXTGGCAGCCAACTACGACCCATTTAAGCAXGGXCGGAXATXGGCXCNGAAXCXXAACTTAXAGACGACATXGCTACGAGT
549098	Ramu Upazila Health Complex; Ramu, Cox's Bazar, Chittagong	AGXTAACGTGAACXCGXGTAAGGAATGCCCTGCTAXAXCCCTTTTATACGXGGXTGGAXATTAACACTAACXCXXAGCTCAXCAATAACATTGTTACGGGC
549105	Ramu Upazila Health Complex; Ramu, Cox's Bazar, Chittagong	AGXTAACGTGAGCXCCTGXCAXGAATACCTTGCCAXAXTCCATTCGAXAAXAAXTGXGXCCXAATXATGACXGXXGACTCCGAACCAATCCTATTACAGGT
549107	BRAC (BHP) Matiranga (1); Matiranga, Khagrachhari, Chittagong	AGNXAATANXGGTCTGTATXNXGGGTANNTTANCANGTCXATTTTNNNCANNGGTGGGXACNAATGCTNTANGCNNACNTAXAAANNXTCNCGCTTNGAGT
549108	Ramu Upazila Health Complex; Ramu, Cox's Bazar, Chittagong	NAXNNATXNGGATXCNTNXAAXXNGNGNNTANTNTXAXNCCATXNGAXXXXGGXTGXAXCCXGNCXCXXTXXCXXNGGNCNXNANTNNCANNNCNNNGNGC
549113	Ramu Upazila Health Complex; Ramu, Cox's Bazar, Chittagong	GGXCAAXGTXGACXCGTGXAAXXAGTXCTTTATTAXAXCGCACTCATAAAXAAXCGGAXACTGACXCTATAXCXXAGGTTCXAGATGXTXCTGCTACGGGT
549114	Lama, Soroi Union, AKOTA Office; Lama, Bandarban, Chittagong	AGGTAGTGCXAGTCCGCGACAGXGGCAGTCAATTTXAATGCTTACATACGXAGXCAGAXCCXGGCAAXGTCCCXXGAGCCATCAACAACATTACTTCAXGT
549116	Lama Upazila Health Complex; Lama, Bandarban, Chittagong	GGNTAGTNTXNNCNCCCATAAGXNGNANCTNGCNNTAACGCTTTCANGCAXNGXNGGAXXCTGNTNCTANCACTXGGNCTAGAACNNANANCGCNTNGNGN
549118	BRAC (BHP) -Dighinala; Dighinala, Khagrachhari, Chittagong	GATCAGCGCXAACCCGCAAAAGTXXTGXTTAGCXATGTCCAAXXCAAGCGGAGACATAXACTGACGCCGAAACXCXGGXTXXXXCCGATXXXXXTATXAXT
549119	Lama, Soroi Union, AKOTA Office (2); Lama, Bandarban, Chittagong	GGGCGGCATGGACCTGTATCAGTGXCGCXTTACXTCAACXAACXCXTAAGGGGACXGXXACTXGCACTGTCCCXXGAGXXXTXAXCGATXXTAXTACXGXC
549120	Ramu Upazila Health Complex; Ramu, Cox's Bazar, Chittagong	GGXCAXXXTXGACXTCXXXAAXXAATXCCCTACTTXAXTGCAXTCGTGAGXAGXCGTAXACAGGTGCTATCXGXAAAGTCCXAAATATXACCGTAACAXGT
549123	Lama, Soroi Union, AKOTA Office (2); Lama, Bandarban, Chittagong	GATTAACATXAACGCGTGTAATGAACAXXTTGXCTCGTCXATXXTAAAAAGAGATGGAXCTTAATGATGAAACXCXACCCCXXXXTGAXXXTAXTXCXXXT
549125	Lama, Soroi Union, AKOTA Office; Lama, Bandarban, Chittagong	GGXCGATGCGAACGTGCAAAAGTGGTGGCTAACCATATTGAATATATGAGXAGXCGGGXCCXGGCGCTATAXCXAAGCTCCGCAACATCCTCACTTTGXAT
549126	BRAC (BHP) -Dighinala; Dighinala, Khagrachhari, Chittagong	GGTTANCNTXGATNNNTNACAGGGGTGCXTAAXCANGACCCAXXXGAGCXNAGGCAXXXANTXGCGCNNXACXXCXNXXTNTXGXCATTATXXXTACAGAN
549127	Ramu Upazila Health Complex; Ramu, Cox's Bazar, Chittagong	GGXCGATGTGAACXCGTAXCATXGGTXCTTTGTTACAXCCCTTTTATACAXAGXCGTAXCCXGATACTATCXCXXAGGCCCXAAATGATATCATTATGAGC
549128	Lama, Soroi Union, AKOTA Office (2); Lama, Bandarban, Chittagong	AAGCGGTGTGGACGCGCATCAGTAGTGCCCAACCTTATXXATXXXXAAAGGAGACXXXXXCTXGTACCGXXXCXCGGCXTAGXXXCGATCXTXXTACGGGT
549131	BRAC (BHP) -Dighinala; Dighinala, Khagrachhari, Chittagong	NGNNANNNNGANCCCGNNAAATTGAXGXTTTGCXTNNTCCAACXXXTNAXGANANAGXXXCTXGCANNNXCCCXXXAXXXXGXXCXGNXCXXAXTXTXGXT
549132	Lama, Soroi Union, AKOTA Office (2); Lama, Bandarban, Chittagong	AGTTGACGCGGGTGCGTGTCAGGAXCAXXTXGXTATAACCATXXTGAGAAGGGACGGAXACTXATAACAACACXCAAGCTCTXAXTGTCCTXGCTTCAGGT
549133	Ramu Upazila Health Complex; Ramu, Cox's Bazar, Chittagong	XGXCAAXGCXGACXCGXAXXTXXAGCGGCCAGCTAXXXCCCTTTTAAGXXXAGXCGXGXXCXGGXXCCAAXXXXXAAGTCCGAGACATTATCACTACAAGT
549134	Lama, Soroi Union, AKOTA Office; Lama, Bandarban, Chittagong	XXXNXXXXTXXXXXXXXXXCXXXGGTAGTCAATCTXXTTXATTXTATAXXXGGXCNTAXXXXXGXXANGTAXGXXXXXXXXTXXXCXXXCXXXXXXXXXGT
549136	Lama, Soroi Union, AKOTA Office (2); Lama, Bandarban, Chittagong	GGGTGGCACXAACCCGNAXAAGTGXTAXXTAGXXACAACXXAXXCANAAAAAGANXGXXCTTGACGCCNXCACXAXACXCCXXAXXATXXXXXXTXTXXXT
549137	Lama, Soroi Union, AKOTA Office; Lama, Bandarban, Chittagong	GGGCAATATXGGCCTGTAAATGGGGCAGTCTGCCTTAACGCATXTAAAAAAGGACGGGXCTTAACACTGTAACTAGGCTTCTAAATATTCTCACTATAXGT
549138	Ramu Upazila Health Complex; Ramu, Cox's Bazar, Chittagong	AGXTAACXTGAACXCGXGXAAXXAATGCCCTGCTAXAXCCCTTTTATACGXGGXTGGAXATTAACACTAACXCXXAGCTCAXCAATAACATTGTTACGGGC
549139	BRAC (BHP) -Dighinala; Dighinala, Khagrachhari, Chittagong	AGGCGATGTXAATCCGTATAAGXXXXGCXTXGXXTTAAXXAXXXCATGCAGAGGTGGAXXTTGACGACGTAACXCGGXXTCGXAXCATXCTTAXTTTXAXT
549141	Lama, Soroi Union, AKOTA Office; Lama, Bandarban, Chittagong	GAGCAGTGCXAATCCGTGAAAGTAGTACTTTACTTCGTCGCACTTAAACAGGGGCGGGGACTGACACTAAACCXAXAGTTCXAAATAACATCGCTACGGGC
549142	BRAC (BHP) -Lama; Lama , Bandarban, Chittagong	AGGTAATGTXAATCTGTAXAAGTGATGXXXXXCXATAACXXXCXCAAGCAAAGACXGAXACTGACGCTGTCACXCAAGXTCTXGXTATXAXXXCTACGGAT
549146	Lama, Soroi Union, AKOTA Office; Lama, Bandarban, Chittagong	AAGCAATGTXGGCCTGCAACAGTAACAGCTTGTCACAATGCTCXTGAGCAAAGACGGAXCCTGACGATGTCACXAAAGTCCXAGATAXCACCATTACAGAT
549147	Lama, Soroi Union, AKOTA Office; Lama, Bandarban, Chittagong	GGTCGGTACXGATGCCCATATTGGGCAGCTAATCATATCGCACXCXAXXXAGGGCGGAXXTXAAXXCTXAXXCXXAACTTAGAGCCGACACCGTTACAGAT
549149	BRAC (BHP) Matiranga (1); Matiranga, Khagrachhari, Chittagong	AGTXGGTXTXGACCCGTANXATTGGTAGCTAGCCTTATCXCTTTCGTAAGAGGANATAXATXGACAACAACCGCAGGCNTCXXAACXXCACNATANTAGGT
549150	Lama, Soroi Union, AKOTA Office (2); Lama, Bandarban, Chittagong	GGGTAATGTXGGCGCGTGACXGTGXTGXTTXAXCATATXCXAXXTATXAGGAGGCGGAXACTXATGCTAAACCXCXGXXCXXXXCXGAXXTXXXTXTXXXT
549151	Lama Upazila Health Complex; Lama, Bandarban, Chittagong	AATCGACATXGATCTGTATAAGTGXTAXXTXGCCACAACXXTXXTAAAAGAAGACAGAXACTGATAACATCCCXAXAXCTCGXXCCGXXXXXXXTXXXAXC
549152	Lama, Soroi Union, AKOTA Office; Lama, Bandarban, Chittagong	AATCAGTATXGATCCGTGAAAGTAGCACTCTGCTTTATCGAATXCAXGCAGGAGTAGAXACTGGCGCCATCCCXCGGGTTCGAACXAXCCCCGCTATGXAT
549154	Lama Upazila Health Complex; Lama, Bandarban, Chittagong	GGTCAGXXTXGACCCGTATNNGNAGNGGNCTACTACGTNGCATXTATGAGXAAXTAGGXATTGGCGATATAXCXCAGCNCATAAACGTCACCACTTTAXAT
549155	Lama Upazila Health Complex; Lama, Bandarban, Chittagong	NANCAGTANXNANCCGTGANAGTNGCXCNNTGCTNTGXCNNATXCANGCAXGAXTNGAXACNGGCGCCNTNXCXCNNNTNNGAACTAACCCNGCTANNXAN
549157	BRAC (BHP) -Lama; Lama , Bandarban, Chittagong	AGGCAATGTXGATCCGCAACAGTGXTAXXXXGXXACATCCAAXXCGTGAAAAGGTXTGXACAGGCACCATCACXCXGXXCXTXXXTATXXTXXXTATXGXT
549159	BRAC (BHP) -Lama; Lama , Bandarban, Chittagong	AGGCAATGTXGGTGTCTGTCAGGGXTACTXAGCXACAACGXAXXCAAAAGGGGACGTAXACTGACGATGTACGXAXACCXXXXXXCGAXXXXXXTXCXAXT
549160	Lama Upazila Health Complex; Lama, Bandarban, Chittagong	XGTXGATATXAACCTGTATXAGTGATACCCTXTTTCATTXCATATXAGAGAAAGCAGGXACTAACACTATCACTAAAGTTCXAAATAXCATTGCTXCGAGT
549161	Lama Upazila Health Complex; Lama, Bandarban, Chittagong	NGTXNNNATXNNNCTGTATXAGTGNTACCCTGNNNCNNNXCNNANXAGCGAAAGCAGGXACTANCNCTATCAXXANNGNTCXAAATAXCATTNCTXCGAGT
549162	Lama Upazila Health Complex; Lama, Bandarban, Chittagong	AGGCAATGTXAATGTGTAXAATTGXTGXXTXAXXTTGACXXXCXCXTGCGAAGACXGGXACAGACACTGAAXCXAAAGXTCGXAXCGATCXTXCTTCXGAT
549163	Lama, Soroi Union, AKOTA Office; Lama, Bandarban, Chittagong	XXXNXAXXXGXXXXXXXXTNXTTGGCAGCTAGCXTCNNCNATTTTXTXXXXGGXXGXAXXXXAAXXCTXXXXCXXAGGTCAGAGACATCATCNCTACANGT
549164	Lama Upazila Health Complex; Lama, Bandarban, Chittagong	NANCAGTNNXNATCCGTGANAGTNGCNCNNNNCNNNGNCNNATXCAAGCAXGAXNNGAXACTGGCGCCATCXCXCNNNTNCGAACTAACCCNGCTANNGAN
549165	Lama, Soroi Union, AKOTA Office; Lama, Bandarban, Chittagong	GAGCGGTNTXNACCNCTGTATGTNGTAGCTAGNNNCAATNATCXTATNANGNGATNGNXACNAATGNCATCACXAGNGNNNGANACGACATNNTTACANGT
549167	Lama, Soroi Union, AKOTA Office (2); Lama, Bandarban, Chittagong	AGGTAATACXGGCGCGTGTAAGGXXCGXXXAAXXTTGACXATXXXXAGAAGXGACXXXXACTXACGCTGTCACXCAACXTCTXACCAXXCXXAXTACXAAC
549168	Lama, Soroi Union, AKOTA Office (2); Lama, Bandarban, Chittagong	AGGCGGTGTGGATCTCTGTAXTGGXTAXTXXAXCACAAXXXTXATAAAAGGAGGCGTXXACAXACGACGTCCCXCXGXXCXXXXXXXXXXTTXXTXXXXXT
549169	BRAC (BHP) Matiranga (1); Matiranga, Khagrachhari, Chittagong	GXTXGATGTXGGCCTGCAAXTXTGGTAGCCTGCCTCATCXAATACGTAAAAAGXTAGAGATTAXXGCXAXAACXAGAGTTAXAGACXXTATCGTTTCGGGT
549170	Lama, Soroi Union, AKOTA Office; Lama, Bandarban, Chittagong	AGXCAGTGTXAGCCTGTGTAAXXAGCGGCTTGTCTXGACGAATTTGTGXAXAGXTGGAXACXAGTGATGAAXGXCGGCTTAGAGACGATATTGTTATAXAT
549171	Ramu Upazila Health Complex; Ramu, Cox's Bazar, Chittagong	NNGCAGCGTGGACXTCTAXATTGGGCGGCTAATCNXAXCGATTXCAAGAGXGGXXGXAXACXNGTXCCGTCXCXXGACNTNXAAATAACCTCGCTANGGGC
549172	Lama, Soroi Union, AKOTA Office; Lama, Bandarban, Chittagong	GGTXAATGTXGACGCGCATCATXGGCAGCTAGCCTCGTCGATTXCGTACAAGGXCATGXATTAACACTATCACXCAGGTCAGAGACATCATCACTACAAGT
549173	Lama, Soroi Union, AKOTA Office; Lama, Bandarban, Chittagong	AGGTAATGTXAATCTGTAAAAGTGATGGCCTGCCATAACGCTCXCAAGCAAAGACGGAXACTGACGCTGTCACXCAAGTTCTAGATATCACCGCTACGGAT
549175	Lama Upazila Health Complex; Lama, Bandarban, Chittagong	XXGXXXXXTXGXTXTGTATXXTXGGTACTXXANCTXXXXXAXTXCXTAXXXNAXCGXAXXXXXXXGCTXTXACCCAXGXTXXXXXTGXXCTXXXXXCNXGT
549176	Lama, Soroi Union, AKOTA Office; Lama, Bandarban, Chittagong	AGTTAGTATXAGTGTGTATATGGGGTGCCTTGCCTCGTTGCTTXTATACAGAGGCGTAXACTGGCGACGXACGXCGGCCTCTAGATATTATCGCATTAGGT
549178	BRAC (BHP) -Dighinala; Dighinala, Khagrachhari, Chittagong	GGGTGACGTXGACCTGTGTAATXXXTGCXXAGXXTTGTCXAXXTCGTGAAAAGATGGAXACTGACGCCGTCACXXGGXXTCTCAXCGAXXXXXXTACGAXT
549183	Naikhongchhari, Baishari BRAC office; Naikhongchhari, Bandarban, Chittagong	AGTTAGTACXGGCCCGTAACAGGGGCACTCTGTCTCAACCCATXTAAGCAAAGACGGAXXCTAGCGCTAACCCXCAGGTTATAGCCAXTACCGCTACGAGT
549186	Naikhongchhari, Baishari BRAC office; Naikhongchhari, Bandarban, Chittagong	NGTTANCGCXNANCNCNAAANGGGGNAGNNTGTNNCNNCGATCXNATAAAAANATNGNXACTAGNACNGACNNXCNNNNTNTAACNGATNCCGCTACGNNN
549189	BRAC (BHP) -Dighinala; Dighinala, Khagrachhari, Chittagong	GGGXAGTACXGACXCXXAACAXTXACACTTAAXXATATXCXAXXCAAGAGGAGATXGXXACAAGCACCGXCAGXCGAGTTCTAGAXAATATTACTATGGAX
549190	BRAC (BHP) -Panchhari; Panchhari, Khagrachhari, Chittagong	AGTXAACGCXAACCTGCAAXAGTAGTGCCTAATCTTATTXCTTTTATAAGGAGATAGGXACTGGTGCCATAACXCGGGTTAXAGACAXCCCCGCTTTAGGT
549193	BRAC (BHP) -Panchhari; Panchhari, Khagrachhari, Chittagong	GGTXAATATXGACCCGCATXATTGGTACCCTATCTCATTXAATTTGAGCAAGGACGGGGACTAATGCTATCCCXCGACTCAXAAACAXTCCCGCTTCGAGT
549194	Lama, Soroi Union, AKOTA Office; Lama, Bandarban, Chittagong	AGNCNGTNTXGACNCGXNTAAXTGGTAGNCTATNNCAXTNCTCXNATGCGXGGXTGGGXATXANCANNGTAXCXXGAGTNCTAAATAACATNNCTACNAAT
549195	Naikhongchhari, Baishari BRAC office; Naikhongchhari, Bandarban, Chittagong	AGXCAACXTGAGTGTCXGXCTXXGATXGCCTGCTTXAXCCCATXTGTGXGXGGXCGXAXATXXACXCCATCXCXXGGGCTAXAGACATCACCGCTACAGGT
549197	Naikhongchhari, Baishari BRAC office; Naikhongchhari, Bandarban, Chittagong	GGGCGGTGTXGGCCTGTAACAGXGGTGGTTAATCTTATCGCATXCAAAAAAGAACGGGXATAGGCAACGACCCXAGGGTTAGAXACAACACCGTAACAAAT
549198	Naikhongchhari, Baishari BRAC office; Naikhongchhari, Bandarban, Chittagong	GGGCGGTGTXGGCCTGTAACAGTGGTGGTTAATCTTATCGCATXCAAAAAAGAACGGGXATAGGCAACGACCCXAGGGTTAGAGACAACACCGTAACAAAT
549199	BRAC (BHP) -Dighinala; Dighinala, Khagrachhari, Chittagong	GGTTANCGTXNATCCNTGACAGGGXTGCXXAGXXACGACCXXXXTGAGNGNAGGCNTAXATTGGCGCNATACCXCXAXXTCXXXXCATTXXXXXTXXXXXT
549200	BRAC (BHP) -Dighinala; Dighinala, Khagrachhari, Chittagong	GGGCAGCATXGGCCCNNNACAGGXXTGCTTAGXXTCATCXXXXXCATGAGAAGGCGGXXXNTGGCANTGTNXCXAGACXTXTXXXCATTXXXXXTXTXAXT
549203	BRAC (BHP) -Lama; Lama , Bandarban, Chittagong	AATCGATATXAACCTGTATCAGTGXCACXXXGCTXTXAXXAAXXCATGCAGGAATGGAXXCTGGCGCTGTACCXCGXCXTATCGCTAXTCXTXCTACGAGT
549204	BRAC (BHP) -Lama; Lama , Bandarban, Chittagong	AGTCAATGTXGGCCCGTATAATTGXTAXXXXAXTATATCCAAXXCGAAAAAAGGTGTAXACAAATGCCATCCGXCXACCTXGXXXCXTXXTXXXTXXXGXT
549205	Naikhongchhari, Baishari BRAC office; Naikhongchhari, Bandarban, Chittagong	AGGCGACGTXAACGCGCGXATXXAGXXGTCAACCAXXACGCTTXTAAGCAAAGGTAGAXCTTGGCGCTGAACCXAGGGCCCXCAACAACCCCACTACGGGT
549206	BRAC (BHP) -Lama; Lama , Bandarban, Chittagong	GATTAATATXAATGCCCGXAATTGXCGXTTAACXTTGACXXAXXTATAAGAAAACGGGXATTXACACCATAACXAXGXXXXXCXXCXTXXTXXXTXCXXXT
549208	Naikhongchhari, Baishari BRAC office; Naikhongchhari, Bandarban, Chittagong	XXXNAATXCGAXNXXGTXXAXXXNGXGNCCTXXXTXGACXNATXNXAXXXXGNXXGGGXXTXGGXXXTXXXXGXXGAGXXAXAAATXATCXTXCXXXAAAX
549209	BRAC (BHP) -Panchhari; Panchhari, Khagrachhari, Chittagong	GGTXAGTGTXGGCCCGTGTXATTAGCGGCTAATCTCAATXAACATAAGAGGAGGCGTGXATAGGTGCTATAACXAGAGTXAXAACTGXCATCACTTTAGGT
549211	BRAC (BHP) -Lama; Lama , Bandarban, Chittagong	AATCGATATXAACCTGTXXCAGTGXCACXXXGCTATGAXCAAXXCXTGCXGGAAXXGXXXCTGGCGCTGXACCXCGACXTATCXCTAATCXTGXTACXXGT
549212	Naikhongchhari, Baishari BRAC office; Naikhongchhari, Bandarban, Chittagong	GGGCGGCGCXAACGCCTGTAAGTGGCACCCTGTCACGTCCCTTXTATACGAAAGTGGGXATAAATGATGTCCCXAGGGTCCXAAACAATATCGTTACAAGC
549214	BRAC (BHP) -Dighinala; Dighinala, Khagrachhari, Chittagong	AGTTAATGCXGATCCGCAXAATTXATACXTXGCTACAACXXAXXTGTGAAGAAATXGXXCCAAACGCCGTAACXAGGGTTATCAACAACATCGTTATGGGT
549215	BRAC (BHP) -Dighinala; Dighinala, Khagrachhari, Chittagong	GGNNAGNGNXGATGCGNAXAAGGXXTGCXTAAXXTCAACXXAXXTGTANANAGACAGAXCTTGACNANNACACXAGGCCXATXAXCGNTATXAXTACXAXN
549217	BRAC (BHP) -Panchhari; Panchhari, Khagrachhari, Chittagong	GGTCAACATXAATCCGTATCAGTGXCAXXXAATCACATXXATXXTAXGCGGAGATGGAXACTXGCAATGTACCXXAGXXTCXXXXTGXXCTXXXTACXGXT
549218	BRAC (BHP) -Dighinala; Dighinala, Khagrachhari, Chittagong	GGTTANTGTXGATGCGTAAAAGTGXXGXXTAGXCTCAACXAAXXTATACANAGACAGXXXTTGACNATGACACXXXGXCCCXXXXCGATXTXAXTXXXAXT
549220	Naikhongchhari, Baishari BRAC office; Naikhongchhari, Bandarban, Chittagong	AGGTGGTGTXGATGTGTAAATGGGGTACCTAACCTTATCGCATXCATXAAGAGATAGAGATTAACACTATACCXAGGCCCXXCAACAACACCGCTATGAAT
549221	BRAC (BHP) -Lama; Lama , Bandarban, Chittagong	NAGCAGTNNGNANCCGTGANAGTGXCGCTTXGCTNNNNCCAAXXCAAGCANGAACAGAXXCAGGCGCCNTCCCXCXGNXTCGXACTAXXCXXGXTANXNAT
549222	Naikhongchhari, Baishari BRAC office; Naikhongchhari, Bandarban, Chittagong	AGGCAACATXGATGTGCATCAGGAATGCCCTACCTTGATGCATACGAGAAGAAACGGGXCTTGACACCATCCCXAGACTTCTAAACAACACCGTTACGAAT
549223	BRAC (BHP) -Dighinala; Dighinala, Khagrachhari, Chittagong	GGGCAACGTXGNTNNCTNTCANXGATGCXTAGCCACATCXATXXTATGNGNGGNNATAXATTGNCACTNANXCXXAAXCCCXXXXXGAXCTXXXTACXGXT
549226	Matiranga Upazila Health Complex; Matiranga, Khagrachhari, Chittagong	AGGTGATATXAACGCGTATCTGGAGTGCCTTGCTACAXCGCTCXCATAAXXGAXCGGAXCCXAAXAXCATCXCXXGGGCTAXAAACATCACTGTTACGXGT
549227	BRAC (BHP) -Lama; Lama , Bandarban, Chittagong	AATTAATATXGGCGTCCAXAATXAATXCTCXATCAXGXCGCTXXTGAACAXAAXCGTGXCCAGATGXCGTCXGXXAGGTTATAAACAATACTGTTATGXAT
549228	Lama Upazila Health Complex; Lama, Bandarban, Chittagong	GGGCAGTACXGATGTCTATAAGTAACAGTTTATTTCGXCGCTTTCAAGAAXAGXTGTGXCCTAACGACAAAXCXXGGGTTAGAGACGACACCGCTATAAAT
549230	Matiranga Upazila Health Complex; Matiranga, Khagrachhari, Chittagong	GGTCGGCGTGGGCXTGTAXAAXGAGTXGTTAGCTTTAXCGAAXTCAAACGXAGXTAGAXCCTAGXACTATAXCXCGACCCCXAAACGACATCACTACGXGC
549232	Lama Upazila Health Complex; Lama, Bandarban, Chittagong	GGGCAGCATXGGTCCGTGACAGGAGTGCCCTACCTTAATGCATXTATACAXAGXCGXAXACTGACGCTXTAXCXXGGGTCAGAAACGACACCACTATAXGT
549233	Lama Upazila Health Complex; Lama, Bandarban, Chittagong	AGGXAATACXGATCCGTATXTTXGACACCCAACCATATTXATTXCXAGCAGAGACAGAXAXTAGTACCATCCCCAAGGTCAXCAACAXTATTATTXCAGAT
549234	Matiranga Upazila Health Complex; Matiranga, Khagrachhari, Chittagong	AGTCAATATXAATGCGCAAAXGTXATAXXXXAXXTTATXCXAXXTXAACAAAGACAGXXACTAGCACCGTAXCXAGACXCXTXGXCATXXXXXXAXCGGXC
549235	Lama Upazila Health Complex; Lama, Bandarban, Chittagong	GGGCAGCATXGGTCCGTGXCAGXAGTGCCCTACCTXAXTGCATXTATACAXAGXCGGAXACXGACGCTATACCXXGGGTCAGAAACGACACCACTATAXGT
549236	Lama Upazila Health Complex; Lama, Bandarban, Chittagong	AGGCGGTGCXGACCTGCATAAGTGGCGCTNAATTTXANCGCATXTATAAAXAAXTGGGXCCXGGCXCTATCXCXXGACTCCGAGACGATATCGCTTCGXGT
549237	Matiranga Upazila Health Complex; Matiranga, Khagrachhari, Chittagong	AGXTAGTXCGAACGTGXAXAAGXGGXXGTCTGTTATGXTGCATTCATAAXXAGXTGXGXATXAACGATGAAXCXXXXXTCAXAGXXGACXCXXCTACAXGX
549238	Matiranga Upazila Health Complex; Matiranga, Khagrachhari, Chittagong	GGXCAACXTXAANXCGCAXXAGXAGXXGCTNGNNTXAANCNATTNANGCXXAGXNAXGXCNXGGXXATATCXCXXNGNCNAGNAATNXNANTNCTATNXGT
549241	Lama Upazila Health Complex; Lama, Bandarban, Chittagong	GATCAGCGTXGATGCGXGTCAGGGGCAGCCTGTCTXGXTGAATTCATACAXAGXCATAXCCTGATGCCGTCACXAAGGCTAGAAATGACACCATTATAXAT
549243	BRAC (BHP) -Dighinala; Dighinala, Khagrachhari, Chittagong	AGTXAATGCXGACCTGCATXAGGAGCGCCTTACCTTATTXATTTTATGAGAAGACGGAXACTGATAACGTACCXCAAGTTCXAAACAXCACCGTATCAXGT
549244	Matiranga Upazila Health Complex; Matiranga, Khagrachhari, Chittagong	AGXNGGCGNGGANGCGTNTATTXGGTGCNTTGTCATAXCNATTATAAGCAXAGXTNGGXCCTGACGATAACXGXCGANTTCGAACCGACATCACTANGXNT
549246	Matiranga Upazila Health Complex; Matiranga, Khagrachhari, Chittagong	AGXTGAXACGGACXCGXGTCATGGGCGGCTTATCTCAXCGCACTCGTACAXAGXTGGGXCCXAACACTGTCXCXXGACTTAGAACCATCACTACAATGXGT
549249	Lama Upazila Health Complex; Lama, Bandarban, Chittagong	AGXTAGCGTXGGCCTGTGACAGXGGCAGCCTACTAXAATGCATXCATGCXXAGXCAXGXCTXAACXCXAAXXCXXGGGTCCTAGACGACACCATTXCGAAT
549250	Matiranga Upazila Health Complex; Matiranga, Khagrachhari, Chittagong	GGTCAACATGGGCCTCTGTAATTGGCXGTCTGTCATGTCGCACTTGTAAGXAGXCGTGXACTAGXGACGTCXGTCGGCCCAGAAACGATACCATTATAXGT
549251	Lama Upazila Health Complex; Lama, Bandarban, Chittagong	AGTCGATGCXGACGTGTGTAAGXXGTGGCCAGTTACAACCCATATGAGCGXAGXCAGGXXCTGACGCTGTCXCCAGGGCTCTAACCATTACTACTACGXAT
549252	Matiranga Upazila Health Complex; Matiranga, Khagrachhari, Chittagong	GATCAATATXAACCCGTAXAATXGGCXGCCTGCCATGXCCATTTCATAAAXAGXTGGAXACAAACGCTGTCCCXAGAGTCATAAATAAXATXGCTACGXGC
549253	BRAC (BHP) -Lama; Lama , Bandarban, Chittagong	AGXTAATXTXGGCCXGTXXAAXXGGTGCTCXACTTXGXCGCACXTGAACGXAGXCGXAXCCXAGCXCTGAAXCXXAGCCCATAACTGATATCATTTCAXAT
549255	Lama, Soroi Union, AKOTA Office; Lama, Bandarban, Chittagong	GXXNXXXXXXXXCXXCXXXXXXXXXXXXXTXXXXXXAACXXXXXTAAXXXXGGXTGTAGXCXNAXXXTGTXXXTXXXGCXXXXXCCAAXXXTXXXAXXXXN
549256	Lama, Soroi Union, AKOTA Office; Lama, Bandarban, Chittagong	AGXTAGTATXGATCCGTAAAATXAGTGCCCTGCCATGTCGATTATATGCGXAGXCXGAXCCTGACAATGTCXGXCGGCTCCGAAATATCACTGTTATAGAT
549258	Lama, Soroi Union, AKOTA Office (2); Lama, Bandarban, Chittagong	AATCGACATXGATCTGTATAAGTGGXAXXTTGCCACAACXXTXXTAAAAGAAGACAGAXXCTGATAACATCCCXXGAGCTCGXXCCGXTXXXXXTACXAGC
549263	Ramu Upazila Health Complex; Ramu, Cox's Bazar, Chittagong	XGXNGGCXXXXATXTCXAXXTXXAGXGGTTAXCXXXAXCCXACXXATXXXXAGXCGXXXXCXGGXXATXTXXCXXGGNTXXGAAAXAACXTXXXXAXAXGC
549264	Matiranga Upazila Health Complex; Matiranga, Khagrachhari, Chittagong	AGTCAGTACXGACCCGTAACXGTGGTGCCCAAXTATAAXXATTXTGTGCGGAAAXAGGXCCTGATAACAACCGXAAGCXTXTXXXCGTXCXXXXTATXGXT
549266	Naikhongchhari, Baishari BRAC office; Naikhongchhari, Bandarban, Chittagong	AAXTAGTXCGGATXTGTGXXAXXAGTXGCCAGXTTXAXTGCATTCGTGXXXAGXCGXGXCCXGACXCTATCXCXXGAGCCAXAACCATCACCATTTTAAAT
549267	BRAC (BHP) Matiranga (1); Matiranga, Khagrachhari, Chittagong	GGTXGGCGTXAACGCGCATXATGAATAGCTTXCTTTAACXAATTTAAAAGGAAGCGGAGACXAGCACTATAACXCGAXTCAXAAACAXCCTXGCATCGGGC
549268	Lama, Soroi Union, AKOTA Office; Lama, Bandarban, Chittagong	GGGTGGCGTXAACCTGCATCAGTAGCAGCTAGCCACGTCGCATXCATGAAGAAACGGAXCCTAACGCCAACCCXAGACTTCTAAATAXCACCGCTACGAGT
549272	BRAC (BHP) -Dighinala; Dighinala, Khagrachhari, Chittagong	GGTXAATGTXGACCCGTGAXAGTAGCGGCTTGTXACGAXXAATTCAXAAAGAAATGGGXACTXACAATGACACXAAAGCTAXAGCCAXCACCGCTTCAGAT
549273	Lakshmichari Upazila Health Complex; Lakshmichhari, Khagrachhari, Chittagong	GGXCGGTGTGAACGCGTAXAAXXGGCXGCCTGTTAXAXTGCTCXCATXCXXAGXTAXAXATXGACXACGTAXCXXGACTCAXAGCCGATATTGTTTCAGAT
549275	Lakshmichari Upazila Health Complex; Lakshmichhari, Khagrachhari, Chittagong	XAXCGGXXCGAACXXGXAXXAXXAGXGGCCTATCAXGXCGCTTXCAAXXXXAGXCGXGXATXAGXXCTXTXXCXXAGCTCCXCAATATCATCGTTACGAGT
549276	Naikhongchhari, Ghumdum BRAC office; Naikhongchhari, Bandarban, Chittagong	XGXCGGTGTGGATXNGTGXXAXXAGCGCTTTGTCAXGXCCCTTTTATAXXXANXTGXGXCCXGATGAXATCXCXXAAGTTAXAAATAACCTTATTACAAGT
549277	Lama Gozalia BRAC Office; Lama, Bandarban, Chittagong	GGXCGGTXCXAACGCGTGXCAXXGGCGXCCTGCTTXAXTGXXCXCATGXXXAGXCGXGXACXAAXXCTGTXXGXXGACCCAGAAACGXCATTACTACAXGT
549278	Lakshmichari Upazila Health Complex; Lakshmichhari, Khagrachhari, Chittagong	GGXTAGCGTXAACCCGXATAAGTGGCGCCCTACCATATCGCTCXCATGCGXAGXCGTAXACTGGTGCTGAACCXXGACTCATCAATGACATCGCTATAXGT
549280	Lama Gozalia BRAC Office; Lama, Bandarban, Chittagong	GGXTAXXXCXGATXXGTXXXAXXGGTGXTTAGTCTXAXCCATXXTATAXXXAGXTAXAXXCXAGCXCXXAXXGXXGGCCCATAAACAATATTACTACGXGT
549281	Lama Gozalia BRAC Office; Lama, Bandarban, Chittagong	AAXTAGCXTXGGCXTGXXXAAXXAAXXGCCAGTCTXGXCGATTXTATXCXXAGXTGXGXXTXAACXACXAXXCXXGGGTTCXAACCAACACCGCTACAXGT
549283	BRAC (BHP) -Dighinala; Dighinala, Khagrachhari, Chittagong	GGXTAGTGTGAACGCCTAXAAXGGGCXCCCAACCTXATCGAATTCGTGCXXAGXCGXAXACXGACXACGTCXCXXAGCCTCXAAACATCATCATTACAAGC
549284	Lama Gozalia BRAC Office; Lama, Bandarban, Chittagong	AAGTAGCXTXGGCCTGTAXAATXAACXXCCAGTCTXGXCGXTXXTATACXXAGXTGXGXATXAACGACAAAXCXXGGGTTCTAACCAACACCGCTACAXGT
549285	Lakshmichari Upazila Health Complex; Lakshmichhari, Khagrachhari, Chittagong	GGXCAACXTXANCGXGNGXCAXXGGXGCNCTGCTAXAXCGNTTTNANXXAXGAXNAXNXANXGATXAXGTXXCXXGNCTTAGANACGACATNATTANAXGT
549286	Lakshmichari Upazila Health Complex; Lakshmichhari, Khagrachhari, Chittagong	GGTTGAXGTGGACGCGTAXAAGTXGCGCCTTATTAXGXTGCTTACATGAAXAAXCGGGXACTAACAAXGAAXCXXAGGCTAXAGCTGATACCACTACAGGT
549287	Lama Gozalia BRAC Office; Lama, Bandarban, Chittagong	AGXCAGTATXAACCCCTAXAAGXGGCXGCNTACNAXAXCCANTTTATACAXANXCGXAXANXNACGATXAAXCXXAGGTCAGAAATNNCANTGNTTCAXGC
549288	Lakshmichari Upazila Health Complex; Lakshmichhari, Khagrachhari, Chittagong	GGXCGACXTXGATCTGTAXCXXXGGTGCCTTGXTAXGXCGXTXXCATAAGXAGXCAXGXACXGGCGACGTAXCXXGGGCCCTCACTATTCCCGTTATAXAT
549290	Lama Gozalia BRAC Office; Lama, Bandarban, Chittagong	AAXNAGCXTXNNCXXNTXXXAXXAAXGCTTTNTNAXNXNGCTXXNNTAXXXAGXCGXNXXTXNNCXCNXTXXNXXGGGNTNGANANANNCNNGNTANNXGT
549292	Lama Gozalia BRAC Office; Lama, Bandarban, Chittagong	AAGTAGCXTXGGCCTGTAXAATTAACAGCCAGTCTCGACGATTXTATGCAXAGXTGGGXATAAACGACAAAXCXXGGGTTCGAACCAACACCGCTACAGGT
549293	Lama Gozalia BRAC Office; Lama, Bandarban, Chittagong	GGGTAATXCXGATCCGXAXCATGGGTGXTTAGTCTXAXCCATTTTATAAAXAGXTAXAXACXAGCACXGACXGXXGGCCCAGAAACAATATTACTACGXGT
549294	BRAC (BHP) -Laxmichari; Lakshmichhari, Khagrachhari, Chittagong	AAXCAGCXCXAGCGCGXATCAGXGGTGGCTTATCTXAXTGCTTTTATGCAXAGXTGGGXACXAGTACTGACXGXXGGCTTATAAACAATATCGCAACGXGT
549295	Lama Gozalia BRAC Office; Lama, Bandarban, Chittagong	GGXTAGTXTXGACXTGXXXATXXGAXXGCCTATCAXGXTCCATXCGTAXXXAAXTGXAXXCXAGCXCTXAXXCXXAACTTCGCAACAACATCGCTATAXGT
549296	Lama, Soroi Union, AKOTA Office (2); Lama, Bandarban, Chittagong	AAXCAGXXTXAATXTGXXXXAXXAGTXCCCAGCCXXAACGCAXTTATACXXAGXCAGAXATXGGXGATATCXCXXGGGTTCXAGACGXTATCGCTACAXAT
549297	Lama Gozalia BRAC Office; Lama, Bandarban, Chittagong	GGXCGGCXCXGAXGTCXAXCAXGGGTXCCTXGCCATGXCCXTCTTAAAAGXGAXXGGAXACTGGTACXGTCXGXXGGGTTAGAAATGATCCCGCTACAXGT
549299	Lakshmichari Upazila Health Complex; Lakshmichhari, Khagrachhari, Chittagong	AATCAGTGTXGGCCCGCAAATTXGGTGGCTAACTTTAATGATTXTGAACAXAAXCGGAXATXGACAACXTCCCXCGGGTTATAAACATCACCATTACAGAT
549302	Lama Upazila Health Complex; Lama, Bandarban, Chittagong	GGTXAGTGTXGATCTCTATXAGTGGTAGTTAATCTTGACXCACATXTACGAGAATAGAXACTGGTGCTGTCCXCCAGGTTAXAAACAXCCTCGCTXCAGGT
549303	Alikadam Upazila Health Complex; Alikadam, Bandarban, Chittagong	GGTCAACACXGATGCGTATCTGXGXTAXXCTATXACAXXCXAXXTATGAAAAAGTGGGXCCTXGCACCAXAAGXCXGXXXXGCXXCXTXXXXXXTXXXGXT
549304	Lama Gozalia BRAC Office; Lama, Bandarban, Chittagong	XAXTAXXXTXGGCXXCXXXAAXXAATXCTCAATCAXGACGCTTXTGAACXXAAXCGTGXNCXGATXCCGTCXGXXAXGTTAXAAACAATACTGTTATGXAT
549305	Lama Gozalia BRAC Office; Lama, Bandarban, Chittagong	GGXNAGCXTXNANXTGXXXAAXXAGCXNNNTNNNAXAXNGNATANANNNXXAGXNNTAXNNXANCACCAANACXCGGCNCNGAAANNACANNGCTANGXNT
549306	Naikhongchhari, Ghumdum BRAC office; Naikhongchhari, Bandarban, Chittagong	GGXCAXXXTXGATXCGXXXXAXXAGCXGCTTGCTTXAXCGAAXTTATAXXXAGXCGGAXATXGGCXCCGTAXGXXGGCTCAXAGACGACXTCGCAACAXGT
549309	Naikhongchhari, Ghumdum BRAC office; Naikhongchhari, Bandarban, Chittagong	GGXTAGTGCXGATGTGTAXAAXXAGTXGTCTGCTAXAXCCATTXTATAAXXAGXCGXGXACXAACXAXXTAXGXXAACTTCGAAACGATACTACTTCAAGT
549313	Naikhongchhari, Ghumdum BRAC office; Naikhongchhari, Bandarban, Chittagong	NNGCGATANXGANCNGTATAANTGACGGCTTGTNACGTCGCTTXNNTAAGAAGATGGGXACTAATAACGAACCXCGGCNCNTAAACATCANTACTACANGT
549315	Naikhongchhari, Ghumdum BRAC office; Naikhongchhari, Bandarban, Chittagong	GATCAGCATXAGTCTGTATCAGTGGTACCTTACCTCGATCATTXTGTGCGAAAATGGGXACTAGTAATGAACCXAAGCTTATAAACGACCTCACTATAGGT
549316	BRAC (BHP) -Dighinala; Dighinala, Khagrachhari, Chittagong	AGTCAATATGAACXTGCATATGTGGCXCCTTATCTTAACGAATTTATAAAXAGXCAGAXCTXAACGCTXTCXCXXGGCTTAGAAACGATACTGCAACGGGT
549317	BRAC (BHP) -Lama; Lama , Bandarban, Chittagong	AGXTGAXXTXAACXTGXAXAAXXGATXCCCTGTTTXAXTGCATATAAGAGXAAXCAGGXACTAACACTATCACTAAAGTTCXAAATAACATTGCTTCGXGT
549318	BRAC (BHP) -Lama; Lama , Bandarban, Chittagong	AGXCAGXXTXGACXCGXAXXAXXAGXGXTTTGCTTXAXCCXXXXTAAXXXXAGXTAXAXXTXAACXXXXXXXCXXGXGCCAGAAATAACATCGCTACGXGT
549319	Naikhongchhari, Ghumdum BRAC office; Naikhongchhari, Bandarban, Chittagong	GGTCGGCACGGATGTGTAXCAGGGGTXGTTAGCCACAXTCATTATGTACGXAGXTGGGXATTAACGATGAAXGXXGGCTCCXAAACAXCCCTACTATAAGT
549321	BRAC (BHP) -Lama; Lama , Bandarban, Chittagong	AGXTGATATXAACCTGTATAAGTGATXCCCTGTTTCAXTGCAXXTAAGAGXAAXCAGGXACXAACAXTATCXCXXAAGTTCTAAATAACATTGXTTCGXGT
549322	Naikhongchhari, Ghumdum BRAC office; Naikhongchhari, Bandarban, Chittagong	AGXCGGTGTGGATXCGXGXXAXGAGCGCTTTGTCAXGACCCTTTTATACXXAAXTGXGXCCXGATXAXATCXCXXAAGTTAXAAATAACXTTATTACAAGT
549323	BRAC (BHP) -Lama; Lama , Bandarban, Chittagong	AGGCAATGTXAATGTGTAAAATTGXXGXXTXAXXTTGACXXTCXCXTGCGAAGACXGXXXCXGACACTGXAACXAAAGXTCGXAXCGATCXTXCTTCXGAT
549324	Naikhongchhari, Ghumdum BRAC office; Naikhongchhari, Bandarban, Chittagong	GAXTAATXCGAACXCGTAXATTXAGCAGTCAACCAXAATGCATXXXXXXXXXXXXXXXXXXXXXXXXXXXXXXXXXXXXXXXXXXXXXXXXXXXXXXXXXX
549325	BRAC (BHP) -Dighinala; Dighinala, Khagrachhari, Chittagong	GGXTNNTGTGNNTGNGTATATGXNGCGNNTTACCATAXTGNNTTNNTNAGXAGXCNGNXANTGNTANNGTNXCXAGGCNCAGAAACAXCATCNXTANNANC
549326	Lakshmichari Upazila Health Complex; Lakshmichhari, Khagrachhari, Chittagong	GGTTAGCGTGAACXCGXAXAAXXGGCGCCCTACCAXAXCGCTCACATGCGXAGXCGTAXACTGGTGCTGAAXCXXGACTCAXCAATGACATCGCTATAGGT
549327	BRAC (BHP) -Lama; Lama , Bandarban, Chittagong	XGXNAACXCXXACXXGXAXXAXXXAXXXTXXGXCXXXXTGXXXXXXXXXXXXXXXXXXXXXXXXXXXXXXXXXXXGXGXXCTAGATGACANCGNTTTAXAC
549328	Lama Gozalia BRAC Office; Lama, Bandarban, Chittagong	GGXTAGXXTXGATGCGTGXCAXXGXXXCCCTGTCTXGXCGXTXXTATAXXXAGXTGXGXXCXGACGAXXTXXCXXGGCCCAXAAATGXCACCATTACGXGC
549329	BRAC (BHP) -Lama; Lama , Bandarban, Chittagong	NAXCNGXXNXNANCCGTXXXAXXNGCGCNNTNCTNXGACNCATXNNNXCXXGAXTNXAXXCXGGCXCXXTXXCXXGGNTCNGNAATAACCCNGCTANNXNN
549330	Naikhongchhari, Ghumdum BRAC office; Naikhongchhari, Bandarban, Chittagong	GGXCGAXATXGATGTGTAXAAXXGGCGGTTTGTTAXAXCGCTTTTATAAGXAGXCGGGXACTAACAAXAAAXCXXAACTTCXAAACATCACTACTACAGGT
549331	Lama Gozalia BRAC Office; Lama, Bandarban, Chittagong	AAXNANTXNXAATXCCXXAXTTXNGCXCTTTNTNAXGXNGAATXTNTAXXXGGXCGXNXACXANTXCNGTXXGXXGGNCCCGAAANNATATCGCTTCAXGT
549332	BRAC (BHP) -Dighinala; Dighinala, Khagrachhari, Chittagong	AGXCAATATGAACGTGTAXCATGGGTGGCTTATCAXGXCGCTTTCGTGCGXGGXCAGGXATTAGCACTGACXCXXAGCTTAXAGACGXCCTCGCTACAAAT
549333	Lama Gozalia BRAC Office; Lama, Bandarban, Chittagong	GGXNANTXNXNNNXXNTXXXAXTAAXGCCNTNNNNXAXCNCACXNNNXXXXNNXTNXNXXCXNNCXACXNXXGXXNANTNNXNNATNNNANNNNNANNXAN
549334	Naikhongchhari, Ghumdum BRAC office; Naikhongchhari, Bandarban, Chittagong	GGTTAATGTGGACGTCCGXAAGXAGCXCCTAXCCTXAXCCAATTCAAGAAXAGXTGGAXACAGGCAAXATCXGXXGGGCCAGAAACAACACCGCTACAGAT
549335	BRAC (BHP) -Lama; Lama , Bandarban, Chittagong	AGXCAGXXTXGACCCGCAXAAXXAGTGGTTTGCTTXAXCCXAXXTAAAXXXAGXXAXAXXTXAACACCXTXXCXXGGGCCAGAAATAXCATCGCTACGXGT
549336	BRAC (BHP) -Dighinala; Dighinala, Khagrachhari, Chittagong	AGXCAGCXTGNATXTNTNXAAGXGGNGNNNAGCCTXAXCNATTTCGTGXXXAGXTNXAXACXANCXCTXTAXCXXGGCTTCXAGACNACANTGCTNTAANT
549337	Lakshmichari Upazila Health Complex; Lakshmichhari, Khagrachhari, Chittagong	NATTAGTATGGACGCGTGXXXXXXXXXXXXXXXXXXXXXXXXXTTAAANAXGGXNGGGXACAAATAATGAAXXXXXXXXXXXXXXXXXXXXXXXXXXXXXX
549338	Lama Gozalia BRAC Office; Lama, Bandarban, Chittagong	GAXCGAXXTXGATGCGXAXAAXXGGTXGCCTATTAXAATGCATTTATGAXXGGXTGGAXATXAGCAACGTAXCXXGAGTTCXAGATAXCATCACTACAXAT
549340	Lama Gozalia BRAC Office; Lama, Bandarban, Chittagong	GGXTAXTXCXGATXXGTXXCAXXGGXGXTTAGTCTXAXCCATXXTATAXXXAGXTAXAGXCXAGCXCXXAXXGXXGGCCCATAAACAATATTACTACGXGT
549341	Lakshmichari Upazila Health Complex; Lakshmichhari, Khagrachhari, Chittagong	AAXTGATATXGGCGCGCGTAAGTGGTGGCTAGTCTCAXTGCATTTATACAXAGXTGGAXACTAGCAATGTCXGXXAGCCCATAXCTAACCTCGCTACAGGT
549342	BRAC (BHP) -Dighinala; Dighinala, Khagrachhari, Chittagong	GATTAAXGCGAATGCGXAXAAXXAATGGCTAATCAXAXCGCAXTTGAGCGXAAXCGGAXATTAGTAAXGACXCXXGGGTTAGAGATAACATCATTACAAGT
549343	Lama Gozalia BRAC Office; Lama, Bandarban, Chittagong	NGXCAACATXNACGCGTGXCAXTAGCGCCCAATNNXGXCGCATXCAAAAGXANXNGNAXCCXAGXGAXXACXCXXGAGTCCTAGANATNANNGTTANAXAT
549344	BRAC (BHP) -Dighinala; Dighinala, Khagrachhari, Chittagong	AGGXAGCGTXAATGCGTATXAXGGGCACCTTGTCATATCXCTTTTGTGAAAGAGCAGGXATTGATACCGTCAGXAAACTCAXAAACGXTATTACTTCGXGT
549345	Lakshmichari Upazila Health Complex; Lakshmichhari, Khagrachhari, Chittagong	AAXCAGCXCXAGCGCGTAXCAGTGGTGXCTTATCTXAXTGCTTTTATGCAXAGXTGGGXACXAGTACTGACXGXXGGCTTAGAAACAATATCGCAACGXGT
549346	BRAC (BHP) -Dighinala; Dighinala, Khagrachhari, Chittagong	GGTCAATACGGATXCGCGTAAGXAATXGCCTACCTCAXTCCATTTATGCAXAAXCATGXCCXAGCGCXGTCXCXXGAGTTAGAAACGACATCGCTTCGAAT
549347	Lama, Soroi Union, AKOTA Office (2); Lama, Bandarban, Chittagong	AAXCGAXXTXAATGTGXGXAAXXGGTXGTCAGCCAXAACGCAXTTATGAXXAGXTGGAXCCXGGXGCTGTCXCXCGAGTTAXAACTGACXTCACTATAXGT
549348	BRAC (BHP) -Dighinala; Dighinala, Khagrachhari, Chittagong	GGXNGNCXCGAANXXNXAXXAXXAAXGNCCTXTCTXAXNGCXXXTGNXXXXGAXCGXAXACXGGTXCXGTXXGXXGGGTXAGAAAXAACATCGCXANNGAT
549349	Lama Gozalia BRAC Office; Lama, Bandarban, Chittagong	AGXTAGTXTXGATXXGTXXXAXXAGXXXCTTACCXXAXCCATXXTGTAXXXAGXCGXGXXCXGXCXCTXTXXCXXGXGTCAXAGCCAXCACCGCTACAXAT
549351	BRAC (BHP) -Laxmichari; Lakshmichhari, Khagrachhari, Chittagong	GGXTGGTXTXAATCCCTAXAXXXGXTGCXTTGCCTXAXTGCTXTCATAAAXGGXTGTAXATXGACGCXGTAXCXXGAGCTCGAACCGACATTGTTATAXGT
549352	BRAC (BHP) -Dighinala; Dighinala, Khagrachhari, Chittagong	AATXGGTACXAACGTGCAAXTTTAGCGCCTAGTTACAACXCTTXTAAACAGAAATGTAXACTAACACTGTCAGTCGGGTCCXAAATAXCCCCACTTCAXAT
549353	Lakshmichari Upazila Health Complex; Lakshmichhari, Khagrachhari, Chittagong	AAGCAATGTGAATGTGTGXAAGTGATGGTTAACCTTAXTCCATTTATGCGXAAXTGTAXCCTGACGATGTAXCXXGGGTCAGAGCCATTATCACTATAAGT
549355	Naikhongchhari, Ghumdum BRAC office; Naikhongchhari, Bandarban, Chittagong	GNGCNNTGNGNNNGNGTAXAAXXGNNGGNNNGNNAXAXNGNNNTTNNANXXAGXNGGNXNNTANCACNNNNXNXXGNNTTCGNNANATCATCNCTACNNNT
549357	BRAC (BHP) -Dighinala; Dighinala, Khagrachhari, Chittagong	GGXNNNCGNGNATGNGNATAANTNGNNGCNNGTTNTAXNNCNTTNAAGCAXAGXNNNAXNNTGNCGCTGNNXCXXNANTCCXANACATTANXAXTATNAGT
549358	BRAC (BHP) -Lama; Lama , Bandarban, Chittagong	XGXTGAXXTXAACCXGXAXAAXTGATXCCCTGTTTXATTGCAXXTAAXXXXAAXCAXGXACXAACXCTATXXCXXAAGTTCTAAATAACATTGCTTCGXGT
549360	Naikhongchhari, Ghumdum BRAC office; Naikhongchhari, Bandarban, Chittagong	GAGCGGTACGGATXTGXGXAAXXGACXCCTTGTTAXGXCGCTTXTGAAXXXAGXTATAXATXGGTXCTGACXGXXGGCCTCGAAACATCACTACTATGGAT
549361	BRAC (BHP) -Lama; Lama , Bandarban, Chittagong	AGXTGAXXTXAACCTGXAXAAXXGATXCCCTGTTTXAXTGCATATAAGAGXAAXCAGGXACTAACACTATCACTAAAGTTCXAAATAXCATTGCTTCGXGT
549364	Lakshmichari Upazila Health Complex; Lakshmichhari, Khagrachhari, Chittagong	AGXCAACGTXAACCCGCAXCAGXGGTXCCCTATCTTGACGCTXATATGCAXAGXTGGGXACXGATACXGTCXCXCAGGTTATAACCAACATCGCTACAXAT
549365	Lama Gozalia BRAC Office; Lama, Bandarban, Chittagong	GGXCGGCXCXAACCTGCGXATXTGXTGCCTXGXTTXAXTCXAXXTATXCGXGGXTAXAXACXAACACCGTXXCXXGACTTCTAGATATTACCACTACAXAT
549368	Lakshmichari Upazila Health Complex; Lakshmichhari, Khagrachhari, Chittagong	AAXCAGCXCXAGCXCGXXXXAXXGGTAGCTTATCTXAATGCTTXTATGCXXAGXTGGGXACXAGTACTGACXGXXGGCTTAXAAACAXTATCGCAACGGGT
549369	BRAC (BHP) -Lama; Lama , Bandarban, Chittagong	NAXCAGTXTXGANXCGXXAXAGXNGCXCTNTNCTTXAXCGCATACAXXCAXGAXTNXAGXCXGGCXCCATXXCXXGXGTXNGAANTAXCCCCGNXAXNXAT
549371	BRAC (BHP) -Dighinala; Dighinala, Khagrachhari, Chittagong	GGGNANCANGNATGCGCNXAAXXNGTGNTTAGTCAXAXCGCACXNANGCGXAGXCGXAXACXGGCXANGTNXCXXGGGCCNGANCCGACACCACTANANNT
549373	Alikadam Upazila Health Complex; Alikadam, Bandarban, Chittagong	AGGCAGCATXGGTCCCTGTCXGTGXTGCXTXACTTCGTCXAACTTATACAAGAACGTGXACTGGCAATAAACCXAXAXXCXXXXXTXTXXXXXXTTCXAXC
549374	Chittagong Medical College Hospital; Panchlaish, Chittagong, Chittagong	GGXCAAXXTXNANXXGXXXXAXXAGTXGTCTGTCXXNTTNCACXXNTXXXXXGACNXAXXCXAGXXCTXAXXXXXGXCTTXGAAATANCATTACAATAXGT
549375	Chittagong Medical College Hospital; Panchlaish, Chittagong, Chittagong	AGTCGGTGCXGACGTGTATAAGTAGTGGCCTGCCTTGATCCTTTCGAAAAXAGXTGTAXATTGGCAATAACACXCGACTCCTAACTAACATCGCAATAGGT
549376	BRAC (BHP) -Laxmichari; Lakshmichhari, Khagrachhari, Chittagong	XGXCAXCXTGAACXXGXAXAAGTGGXGCCCTATTAXATCCATTXTATAXXXAGXCXXAXACXGGTXCTGTXXCXXGACTTAGCAATGACACCGCTACAGGT
549378	Matiranga Upazila Health Complex; Matiranga, Khagrachhari, Chittagong	GGGCGATGTGGATGCGTATAXGTGGTGCXCTGXCATXAXXCATXTGTGAAAAGGCAGAXCCTGGCAATGTCXGXAXGXXTCXXXXXGXXXXXXXTXXXXXT
549380	Chittagong Medical College Hospital; Panchlaish, Chittagong, Chittagong	GGGNAATXTXNANCTGTNANATNAGTGNNCNNNCNXGXTNCANTCNNGNNXNGXNNGAXACNAGCNNNANNANXCGNCTTCGAAANNNNATTNCNANAANT
549381	Chittagong Medical College Hospital; Panchlaish, Chittagong, Chittagong	XGXTGGXXTXGGXXNCXXXAXXXGAXXCCTTACTXXXXTGCXTXCXNXXXXAGXCGXGXACXGAXXCTXAXXXXXGXGTTXGNAACAACATCGCXXXGGGT
549382	BRAC (BHP) -Panchhari; Panchhari, Khagrachhari, Chittagong	AGGTAGTATGAACCCCTAAAATTGXTAXXXAGXTTCAACCAAXXXXTAAAAAGACAXXXXCTXACGCCGXAAXXCAACCCXTXAXCATTXXXACATTGAAT
549383	Chittagong Medical College Hospital; Panchlaish, Chittagong, Chittagong	GGGTAATGTXGACGCGTGACATTAGTAGCTTACCTTGACGAATTTATAAGXAGXTGGAXACAGACGCTATCACXCGGCCTAGAGATAACACCACTACGAAT
549385	BRAC (BHP) -Dighinala; Dighinala, Khagrachhari, Chittagong	AAGTAGCGTGGATGTGTATCAGGGGTGGCTAGTTTTAXCCCATXXXXXXXXXXXXXXXXXXXXXXXXXXXXXXXXGACTCAGAGACATTXCTACTACAGGT
549388	BRAC (BHP) -Laxmichari; Lakshmichhari, Khagrachhari, Chittagong	AAGCAATGTGAATGTGTGXAAGXGXTGGTTAACCTXAXTCCATTTATGCXXAAXTGTAXCCXGACGATGTAXCXXGGGTCAGAGCCATTATCACTATAAGT
549389	Chittagong Medical College Hospital; Panchlaish, Chittagong, Chittagong	NGGNGANATXGACGNGNAXNAGTGAXACTTAACTACNAXXXAXXTATGNGGGGNNAGAXXNAAGCGNCNTCNGXCXAXXXCXXXXTAXXXXTAXTXTXXXT
549390	BRAC (BHP) -Dighinala; Dighinala, Khagrachhari, Chittagong	GGXCGGTGCXAGCXXGTGXAAGGGGTGGCTTGTCTCAXCGCTTTCGTGAXXAGXCAGAXACTGACACXGTCXCXCAGCCTAGAGATAXCACCACTTTAAGT
549392	Lakshmichari Upazila Health Complex; Lakshmichhari, Khagrachhari, Chittagong	AATCGGTACGAATXTCCGXCAGTAGTGCTCAGCCTTAXTGATCTCATAAAXAGXTAGAXACTAGCAAXATCXCXCGACTCCXAACCGACACTATTATAAAT
549394	BRAC (BHP) -Dighinala; Dighinala, Khagrachhari, Chittagong	GAGTGGCACGGATGTCTATCTTTAGTXCCTTATCATAXCGCATXTATGCAXAGXCGGGXACTAATGCXATCXGXXGGGCCCGAAACAATCTCGCTACGGAT
549395	BRAC (BHP) -Dighinala; Dighinala, Khagrachhari, Chittagong	XXXXXXXXXXXXXXXXXXTCTXGNACGGNNAATCNCAXNGCATTCATACXXAGXTGGAXCTXAGTGANNACXCXXAGGTCAXAGATGACXNCATTANGGGT
549399	BRAC (BHP) -Dighinala; Dighinala, Khagrachhari, Chittagong	AATCAGTATGAATXTGTAXCAGTGGCXGCTTACCTTAXCGATCTTATACGXAGXTAGAXATAGATGCXATCXCXCGAGTCAGAAATGACACTGCTACGXAT
549401	Lama, Soroi Union, AKOTA Office (2); Lama, Bandarban, Chittagong	GGXTAAXXCXGATCCGXGXAAXXAGTXGCCAGTCAXGXCGAAXTTAAACXXAGXTGTGXCTXAAXGATGACXCXAGAGTTAXAGACAATATCGTTACAXAT
549402	BRAC (BHP) -Laxmichari; Lakshmichhari, Khagrachhari, Chittagong	GAXTAATGTGGGTGTGXGXCAXXAGTACCCAATCAXAACGATCXXXXXXXXXXXXXXXXXXXXXXXXXXXXXXXXAGCTCCXAAACAACATCACTACGGGT
549405	BRAC (BHP) -Laxmichari; Lakshmichhari, Khagrachhari, Chittagong	AGXCNGTATGGACXCGXAXAAGTAGCXGCCTGTTAXAXCGATCXCATAAXXAAXTNXAXCCTGAXAATGACXCXXGGCTCCGAAACGATATCGCTANAGAT
549409	Lama, Soroi Union, AKOTA Office (2); Lama, Bandarban, Chittagong	GGTCAXTGTXGACCCCTGTCAGTAACGCCTAGTCTCGTTGCATATATACGXAGXCGTGXATTGGTGATATCACTXAAGTCAGAGCTGACATCACTATAGGT
549412	BRAC (BHP) -Laxmichari; Lakshmichhari, Khagrachhari, Chittagong	AGXCAAXXTGAGCXTCCAXAAXGAGCGCCTAGCCAXGATCCATXCGTACAXGGXCAXAXACXGAXACXGAAXCXXGGCTCCXAGACATTXTTACTACGXGT
549414	BRAC (BHP) -Dighinala; Dighinala, Khagrachhari, Chittagong	GNXNAGNXTGGNCXCGXNTATXGNNCGGNTAATCNCAXNGCATTCATACXXAGXNGXAXCNXNGTNANNANXCXXGNGTCAGAGATGANANCNTNATGGGT
549415	Lama, Soroi Union, AKOTA Office (2); Lama, Bandarban, Chittagong	GGXCAXXXTXGACXCCXXXXAXXAACXCCTAGTCTXGATGCATATATACGXAGXCGTGXATXGGXGATATCACXXAAGTCAGAGCTGACATCACTATAXGT
549416	BRAC (BHP) -Dighinala; Dighinala, Khagrachhari, Chittagong	GGXCAGTXTGGACGCGXAXXAXTAACGCCTAACCAXAXCNCTXTCAAGXXXGGXNGXAXATXANCXAXGTAXCXXGAGTTAGAAATATTACCNCTACNGNT
549417	Chittagong Medical College Hospital; Panchlaish, Chittagong, Chittagong	AGGTGGTGXGAACCTGTGTAAXXGXXGCCXAATXTXXACGAAXXTAAGXXAAGXTGGXXACAXACAACXXXCXXXXXCCCCXCXXTXTXXXTAXTAXXXXX
549418	Chittagong Medical College Hospital; Panchlaish, Chittagong, Chittagong	AAGCAGTACGGATCTXTAACAGTGXTXCTTAACTTCATXCAAXXCGTGCAXAGGCAGXXACTGATGATAXCCCXCGGXCCCTXXXCGTXCTXAXTACXGXT
549419	BRAC (BHP) -Panchhari; Panchhari, Khagrachhari, Chittagong	XGXTXGCXTXGXCXCGXXXATXXXAXAXCTTGTCXXAXTCCAXTTXAXXXXXGXXGXAXXCXAGXXCXXTXXGXXAXCCTXXAAACGTXATCGCXACAXGX
549420	BRAC (BHP) -Laxmichari; Lakshmichhari, Khagrachhari, Chittagong	AATCAATATXAATXCGTGTAATTXGCAGTTAGTCXCAXXGCACXCAAGCGXAGXCGGAXCCAGGXAACGTCXCXCAAGTCXXAAACATCATCGCTACGXGT
549421	Lakshmichari Upazila Health Complex; Lakshmichhari, Khagrachhari, Chittagong	GGTTAATATGAACXCGXAXCAGXAGTXGCCAACCACAXCGCTTTTAAAAGXAGXCATGXACTAACAATGAAXCXCGAGTTCGAACCGXCXTCACTACAAGT
549422	Matiranga Upazila Health Complex; Matiranga, Khagrachhari, Chittagong	NNTNANCGNXNNTGCNTNTNATGGACACTXAAXTNCNTCCAACXXGTGCXGAGATXXXXXCTXACACTXXXXXXXGGXCCCGCXXCATTXTXAXTATXGXT
549423	Matiranga Upazila Health Complex; Matiranga, Khagrachhari, Chittagong	AGTTGAXATGGATXCGXGTCTTXGGTGGCTAGTCTCAXTGAATTTAAACAXAAXTGGGXCTTAACACTGTCXCXXGACTTAGCACCAACXCCACATCGXGT
549424	Chittagong Medical College Hospital; Panchlaish, Chittagong, Chittagong	NNTNNGTXNXGGTGCGTAXCAXGANXGCCTTGTNAXAXCNCTCXTANANAXNGXNAXNXANXGGNXNTXNAXCXXGGGTNATAAACAANATCGCTACAANC
549426	BRAC (BHP) -Dighinala; Dighinala, Khagrachhari, Chittagong	GGXCGAXXTXAATCTCXXXXXXXXGCXGCTTXTCXXXXTCATXTTATGXXXAAXTGGAXACXGGCXCXATCXGXCGACTTAXAGATGXCACCACTACGXAT
549427	BRAC (BHP) -Panchhari; Panchhari, Khagrachhari, Chittagong	AGXCANTXTXAACNTGXATATXXGGCACCTTATCNXAACGAATXTATAAAXAGXCAXAXCTXAACXCTATCXCXXGGCTTAXAAACGATANTGCAACGGGT
549429	BRAC (BHP) -Laxmichari; Lakshmichhari, Khagrachhari, Chittagong	GAXCAGXATGAATXCGTAXCAGXAATXCCCTATTAXGXCGCATTTAAGCXXAGXCGGGXACXGGCAXCATCXCXXGACCTAXAAACATTATCGTTTCGXAT
549433	BRAC (BHP) -Panchhari; Panchhari, Khagrachhari, Chittagong	GGGCNNTGCXGNNGNCTAANTGXNGCGCCNNNTNTXNTTGCTNTTATACXXANXTGXGXNNXGNCACXGTCXCXXGAGTTNGANCNATTATCGTNACNGAT
549434	Matiranga Upazila Health Complex; Matiranga, Khagrachhari, Chittagong	GGGXGXCGTXGATCTGCGAXATXGXCGCXXXAXCTCGTCXAACXXAAGXXGAGACXGGXXXXGACGCTGTCXXXXGGCCCXXXACXAAXXXXXXTACAXXC
549435	Dulyatali BRAC Office; Lakshmichhari, Khagrachhari, Chittagong	AGTXGGTATXAATCTGTAAXAGTGACACCCTATCTCAACXATTATATGAAAAAACAGAXATTAGCACCATCACTCAAGTCAXAACTAXCATCGTTXTAGAT
549438	Lakshmichari Upazila Health Complex; Lakshmichhari, Khagrachhari, Chittagong	XAXXAACXTXXACXXGXXXXAXGGGXXGCTTATCAXAXCGCATXTXAXXXXXAXCGXAXXCXGGXXAXXTXXCXXGXGCCCGAGCTATTACCXTXACXAAX
549439	Dulyatali BRAC Office; Lakshmichhari, Khagrachhari, Chittagong	AGGXGATGTXGACGTGTGTXAGGGGTGCTCTATTACGATXATTTTATGCGAAGATGGAXACTAGCGCCGTCCCXAAGGTTAXAGCCAXTACCGCTTCAAGT
549440	Chittagong Medical College Hospital; Panchlaish, Chittagong, Chittagong	GGTTGATACXGACCCGTGTCXXTGACGCXTAAXXACAAXCAXXXTGAXAGAAGXCXGXXACTXACXACAXCCCXCGGGXTXTXXXTAXTCTTAXTXTGGGT
554994	BRAC (BHP) Matiranga (1); Matiranga, Khagrachhari, Chittagong	AGGCGGCXCXGATGCGTGAAAGGXGCGGCTTGTCATATCCCATTCATGCXXAAXCGGGXACXGGCACCATCXCXXGGGTCAGAAATATCACCGCTTTGXGT
554998	BRAC (BHP) Matiranga (1); Matiranga, Khagrachhari, Chittagong	ANXTGATXTGAACGXGTAXCTXGAGTXCCTTGCTAXAXCGCTCTCATXAXXGAXCGXAXCCXAAXXCCATXXCXXGXGCTAXAAACATCACTGTTACGXGT
554999	BRAC (BHP) Matiranga (1); Matiranga, Khagrachhari, Chittagong	GGXCAACXTXNANGCNXGXXAXXAAXGCCCTGTCAXAXCGCXXTTATAXAXGGXTGGNXXNXNATXACXTXXGXXGANNTAXAAACATNANCACTATAXGT
555000	BRAC (BHP) Matiranga (1); Matiranga, Khagrachhari, Chittagong	NNTNGGCNNGNANGCNTATNAGTAGNGGNNNNNCNNGXNNNTCTNANANXXAGXCNGAXANNAGXNAXNANXCXCGGNNCNGAAANGATACXACTANNXNT
555001	BRAC (BHP) Matiranga (1); Matiranga, Khagrachhari, Chittagong	AGTTGATATXGATCCGXGTCTTXGGTGGCTAGTCTCAXTGAATTTAAACAXAAXTGGGXCTTAACACTGTCXCXAGACTTAGCACCAACACCACATCGGGT
555002	BRAC (BHP) Matiranga (1); Matiranga, Khagrachhari, Chittagong	AGGCAACGCXGGTCCGXGXAAXXAATXCCTTXTTAXAXCCCTXTCATGAGXGAXCGGAXCCTAGTAACATCAGXXGACTCCGAAATAATATTGCTATAAGT
555003	BRAC (BHP) Matiranga (1); Matiranga, Khagrachhari, Chittagong	AGXTGATATGAACGCGTAXCTXGAGTGCCTTGCTAXAXCGCTCTCATAAXXGAXCGXAXCCXAAXACCATCXCXCGGGCTAXAAACATCACTGTTACGXGT
555005	Panchari Upazila Health Complex; Panchhari, Khagrachhari, Chittagong	GGTCAGTXCXGATGCCTGAAATTAGTACCCTATCTTAACCCATTTGAAAGXGGXCGGAXACTGGCGCCATCCGXXGGCTCCGAGCCGTCCCTGCAACAAGT
555006	Panchari Upazila Health Complex; Panchhari, Khagrachhari, Chittagong	AAXTAATACXAGCGCGTGTAATXAGTGCCCTGTCTCAACGAATXTAAAAAXAGXCGGAXACXAGTGCXATCXCXXGGCTTAGAAATATCCCTGTTTCAGGT
555007	Panchari Upazila Health Complex; Panchhari, Khagrachhari, Chittagong	AGTTAAXGTXGATCTGTAACTTTAACGCCTTGTTTXAACGCTTTCATGCAXGAXCATGXATTGATACCGACACXXAAGCTCXAAACGACATCGCTACGAAT
555009	Panchari Upazila Health Complex; Panchhari, Khagrachhari, Chittagong	GXXCAACXTXAATGCGTAXXTTXAATXGCTTGTCAXGXCCAATXTGTXXXXXGXTGGAXXCXAGCXCXXTXXCXXAACTCCGCAACAACCTCGCTATAGGT
555012	Panchari Upazila Health Complex; Panchhari, Khagrachhari, Chittagong	GAGTAGTGTXGATCCGTATAAGTAXTGCXXXAXCATATCXATXXTGTGCAGAAGTXTXXACTXGCGCTGXACGXCXGXCTXXXXXCGXXXXTXXTXCXGXT
555013	Panchari Upazila Health Complex; Panchhari, Khagrachhari, Chittagong	AGTTAATGTXAATCCGTAXAAGTGACGCTTXGCCATAXTGXTCTTGAACGXAGXTAGAXACXAGCACXGTAXGXCGGCTCCTAGACGACACCGCTTTGXGT
555015	Panchari Upazila Health Complex; Panchhari, Khagrachhari, Chittagong	GNTXNNNGTXAACNTGNAAXTGTAGCNNCCNGNNTCATNXCATXTANGAGAAGNNAGNXANNNNCGATGTNNGXCNNCCTCXANCCAXNNTCGNNTCAXGT
555016	Panchari Upazila Health Complex; Panchhari, Khagrachhari, Chittagong	AGGXAGTATXAACCCCTAAXATTGGTAGCCAGTTTCAACXCATATATAAAAAGACAGAXACTGACGCCGTAACXCAACCCAXAAACAXTACCACATTGXAT
555017	Panchari Upazila Health Complex; Panchhari, Khagrachhari, Chittagong	AGXTAGCGTXGACGCCCGXAAXXGATGGCCTGTTTXAACGATCXCAAGCGXAAXTAXAXACTAGCXATGTXXCXXAGCCCCTCAACATCATCGCTACAXGT
555019	Panchari Upazila Health Complex; Panchhari, Khagrachhari, Chittagong	GGXTAATATXAACCCGXATCAXXAGTAGCCAACCACAACGCTTTTAAAAXXAGXCAXGXACXAACAATGAAXCXXGAGTTCGAACCGXCCTCACTACAAGT
555020	GHRONI Malaria Control Program, Tarachha,Rowangchhari (1); Rowangchhari, Bandarban, Chittagong	AGTXGGCGTXGATCCCTGAXAGTGGCGGTTTGCCTTAACXCTTXCAAGAGGGGACAGAXACTGATGCCGTAACXAAAGTTAXAAACGXTCCCACAXCGXGT
555028	Bandarban District Hospital; Bandarban Sadar, Bandarban, Chittagong	GGGTAATGCXAATCCGTATATTTGGCGGCCAACTTTATCGCATACGTGCAGAGATGTGXACTAACGCTATACGXXGAGTTATAAATAACATTGTTACAAAT
555030	Bandarban District Hospital; Bandarban Sadar, Bandarban, Chittagong	GATTAATACXAACCCGTGTATTTGACGCTCTGTCTTATCCCACXTAAACGAAGACAGGXCCAAATAATGACACXAGGGCTATAGCCATTCXCGCTATAAGX
555036	BRAC (BHP) -Manikchhari; Manikchhari, Khagrachhari, Chittagong	AGXCAGXXCXAACXCGXXXXAXXAGCXGTCAGTTTXAACGCATXCGAGCXXGAXCATAXACTAGXAATGTAXCXXAGCTTAXAGACGACACCGCTACGAGT
555037	BRAC (BHP) -Manikchhari; Manikchhari, Khagrachhari, Chittagong	GAXCGGXATXGGTGTGXAXXXXXXXXXXXXXXXXXXXXXXXXXTTAAAXGXAGXCGXGXATXAACGCCGTCXCXXGACTCAGCGATATTATXGCTTCAXAT
555038	BRAC (BHP) -Manikchhari; Manikchhari, Khagrachhari, Chittagong	AGXTAGCGTXAACXCCTATANXTAGTGNCTNNTCTXATCGCTCTNATANAXAGXCGXGXATXAATXAXATCXGXXXXXXXXXXXXXXXXXXXXXXXXXXXX
555041	BRAC (BHP) -Manikchhari; Manikchhari, Khagrachhari, Chittagong	AGXCAGTXCXAACCXGCGXXAXXAGXGGTCAGTTTXAXCGCATXCGAGXXXGAXCAXAXXCXAGCXATXTXXCXXAGCTTATAGACGACACCXCTACGXGT
555042	BRAC (BHP) -Manikchhari; Manikchhari, Khagrachhari, Chittagong	GGXCAGTGCXAATGCGTGTCAXGGGXAGTCTGTCTXAXTGCATXTGTXXXXGGXCAXGXACXGACXCXXAXXGXXAGGTTAGAGACATTCCTGCTACGXGT
555044	BRAC (BHP) -Manikchhari; Manikchhari, Khagrachhari, Chittagong	AGXCAGTACXAACCCGXGXCAXXAGCGGTCXGTTTXAXCGCATXCGAXCXXGAXCAXAXXCXAGCAATXTXXCXXAGCTTATAGACGACACCGCTACGXGT
555045	BRAC (BHP) -Manikchhari; Manikchhari, Khagrachhari, Chittagong	AGXTANCXTXAANGTCXAXAAXXNGTGGNTAGTCNXATNNCTNTCAAGAAXGGXNGXNXXNXAAXGCXXTXXCXXGGCTCATNGATGACATCNCTACNNAT
555046	BRAC (BHP) -Manikchhari; Manikchhari, Khagrachhari, Chittagong	AGXCAGXXCXAACXCGXGXXAXXAGCXGTCAGTTTXAACGCATACGAGCAXGAXCATAXACTAGCAATGTAACXXAGCTTAXAGACGACACCGCTACGAGT
555049	BRAC (BHP) -Manikchhari; Manikchhari, Khagrachhari, Chittagong	AAXCGATATXGACGCCTGXXXXXXXXXXXXXXXXXXXXXXXXXXCAAGXAXAGXTAXAXACXGGTXCTGTAXGXXAAGTCATAAATGACATCGTTATAGAT
555051	Matiranga Upazila Health Complex; Matiranga, Khagrachhari, Chittagong	AGXTAGCGTXGGCGCGTATAATTGGTAGCCTGTCTTAACGAATXTAAACGXAGXTAGAXACAAACACTGACXGXXGAGTCAGAAACATCCTCATTACAXGT
555052	Matiranga Upazila Health Complex; Matiranga, Khagrachhari, Chittagong	AGGCGATGTGGATGCGCATAXTTXXTGXXXXACXTTAAXXAXXXTGTGAAAXGACAGXXACTXACACTAXACCXAGAGXCXTXAXTAXXCTXXXTATAGXT
555053	Matiranga Upazila Health Complex; Matiranga, Khagrachhari, Chittagong	AAGCGATATXAGCGTGCGAATTTGXCACXXXGCXACATCCXAXXXXAGCGGAGGTAGXXXCTAGTGCTGXAACXCXGXXXXXXXXTGATCTXAXTXTXGXC
555054	Matiranga Upazila Health Complex; Matiranga, Khagrachhari, Chittagong	GGXTAGXXCXGACXCGXXXAAXXAGCXCCTTGCTTXAXTGCTTTCATGAAXAGXCGGAXATAAAXACCGTAACCAAGCTTCXAGACGACATCGTTATGXAC
555055	Matiranga Upazila Health Complex; Matiranga, Khagrachhari, Chittagong	GATTNATGNXNANNCGXANNTNNNATGCNNXNTCNNAACNCATTNAAGAGXAGXTNNNXANTANCNACGTCAGXAGAGTXNXCXXCNTCATCNCTACAAAN
555056	Matiranga Upazila Health Complex; Matiranga, Khagrachhari, Chittagong	AGTXAATAXGGXTCXGTAXXAGGGXTAXTXXGXXATGTCXAAXXTGTACAAXGATAGXXACTAATGCTAXCXGXCXXCXCXGXXXCXTTCXXXXTXXXAXT
555057	Matiranga Upazila Health Complex; Matiranga, Khagrachhari, Chittagong	GAXTAAXXNXNANXCGXXXXTXXAATXNNNAATCNXAACNNATTNAAGAGXAGXTNNGXANXANXNNCXNCAGXAGAGTTNXCAACGXCATNNCTACNXAT
555058	Matiranga Upazila Health Complex; Matiranga, Khagrachhari, Chittagong	ANTCANTACXGATGCGTAAAAGTAXTACXTTAXCTCNNCCAAXXTXTACAGGGACXXGXACTGANAATGTACGXCXGXXTXXXXCCXAXXTXXXTXXXGXT
555059	Matiranga Upazila Health Complex; Matiranga, Khagrachhari, Chittagong	GANTGATGCXNANGCGXANNTGTNATGCTNANTCNCAACNCATTNAAGAAXAGXTNNNXANTANCNACGTCXNXAGAGTTNTCAACGTNATNNCTACNNNT
555060	Matiranga Upazila Health Complex; Matiranga, Khagrachhari, Chittagong	AGGTGACATXAGCCCGCAACAGGGATACXTAAXXTCGACCAAXXXGAGCAGAGATXGXXXTTGGTACTGXCXGXAGAGXTCTCXXCGAXXTTXXAACXGGT
555061	Matiranga Upazila Health Complex; Matiranga, Khagrachhari, Chittagong	GGGTGGTATXGACGCGCAACAGGGATGGCCAGCCTTAXCGAACTTGTACGXGGXCGTAXACAAGCAXCGTCXCXXGAGTTAXAAATAATCTCATAACGXGT
555063	Matiranga Upazila Health Complex; Matiranga, Khagrachhari, Chittagong	GNTCNNTNCXGANNCNTAXAATGGACGXCNTATNACAXCGCACTNNTNNAXAGXTGNNXANTAGCNCTANCACCCAANNCCGANANANNACNACTNNNXGT
555075	Khagrachhari Civil Surgeon Office; Khagrachhari Sadar, Khagrachhari, Chittagong	NGXNGGCGTXNGNGXGNAXAAXXNGXGCCNTGNCAXAXTNNNTXNAAXXXXNGXCGXAXXNXNNXGACXNXXCXXNGGTTCTANANNTNATCGCTANGXNT
555116	Chittagong Medical College Hospital; Panchlaish, Chittagong, Chittagong	AGXNAXXXTXXATXXGXXXXAXXXXXGXXTXGTCXXXXCGXXXXCATXXXXXAXCNXAXXCXAAXXACXAXXCXXGXNTNATXXNTAXTACXGCTAXAXGC
555117	Chittagong Medical College Hospital; Panchlaish, Chittagong, Chittagong	GATTAATXTXGGCCCCTATANTTAGCXNTCTGCCAXAXCCANTXCANANGXNGXCAGGXATTGGCANTGTAXCXXGGGCTAGAGCTGACCTCATTATAXNT
555120	Chittagong Medical College Hospital; Panchlaish, Chittagong, Chittagong	GGXCGACXTXAACCXCTAXAATXAGTAGTTAGTCAXAXTCCATXTAAAXXXAGXTGXGXXCXGACGCXXTXXCXXAAGCCCGAAATGACATCACTACGXGT
555121	Chittagong Medical College Hospital; Panchlaish, Chittagong, Chittagong	GGXTAAXXTXGGTCCGXGXCAGXGGCACCCAATTAXGACCCANXTATGAXXAGXCGXAXATXAACXCTGACXCXXGGGTCCTAAATGXCCTCGCTACGGGT
555125	Chittagong Medical College Hospital; Panchlaish, Chittagong, Chittagong	AGXCGGTGTXGNCCCGTAXAATXAGTXGTTTATCTXAXCGAATXCGAACGXAGXCAXAXXCXGAXACTXTXXCXXGGCTCCTAAATAATACNNNNACGGNT
555126	Chittagong Medical College Hospital; Panchlaish, Chittagong, Chittagong	AGXTNNCXTXAACCCGTATAAXXAGCAGTTAACCAXGACCNTTXCNTGXXXAGXCAXAXACXAACXCTXTXXCXXGNCTCCGAGCTGACACCACTTCGAGT
555130	Chittagong Medical College Hospital; Panchlaish, Chittagong, Chittagong	XXXXXXXXXXXXXXXXXXXATGXAXCGXCTTGTCAXAXCGCTCTTATAAGXAGXTGGGXACTAGTAATGACXCXXGGGTCAXAGACAACATCGCTATAXGT
555132	Chittagong Medical College Hospital; Panchlaish, Chittagong, Chittagong	AGXCNNCXNXGANXXGNXXATXXNGXGXCNTGNCAXAXTGCNCXTAAXCXXANXNNXAXXCXGNCXATXAXXCXXAAGTNAXAAANATCCCCGTTACNXNT
555137	Chittagong Medical College Hospital; Panchlaish, Chittagong, Chittagong	AAXTAATXTXGACGCGTNXAAXXNATANCCNGTCATAACNCNTTTNNGCXXAGXNGXAXACXANXXCTATXXCXXGGCTTNGAACCAACCCCGCTNCNGAT
555140	Chittagong Medical College Hospital; Panchlaish, Chittagong, Chittagong	XGXNAAXXTGXXTXXGXXXXAXXGAXXXTXTXCXXXXXCCCXXXTAXXXXXAGXXAXGGXTXGGCXCTXTXXCXXAXCTNATXGCTGACACCGCTACGXGX
555141	Chittagong Cantonment (CMH); Bayejid Bostami, Chittagong, Chittagong	AAXTGGTXTXGACCCGCANATXXAGCACCTAGTCTXAXTGAATXTATAAGXGGXTGGAXATTGACXCTGACXCXXGGGTCAGAAACATTCTTATTACAAAC
555143	Chittagong Cantonment (CMH); Bayejid Bostami, Chittagong, Chittagong	AAXTGGXXTXGACXNGXXXXTXXAXXXCCTXGTCTXAXTGXAXTTATAXXXGGXTGXAXXTXGACXCTXAXXCXXGGGTCATAAACATTCTTATTACAXAC
555144	Chittagong Cantonment (CMH); Bayejid Bostami, Chittagong, Chittagong	ANXCGGNXTXGANXXCXAXXATXGGTGCCCTATNTXGXNGCTNXCAAGXXXAGXTNXGXXNXANCXCCXTXXCXXNACTTNTAANNGACATCACTACAXNT
555145	Alikadam Upazila Health Complex; Alikadam, Bandarban, Chittagong	GGXCAGCXTGGATGCGXGTAAXXXGXACCTXACCAXAAXXXACTCAXXXXXGAXCGXGXACXGGCXCXGXXXCXXGACTCCGAAATATXATTGCTACGGGC
555149	Chittagong Cantonment (CMH); Bayejid Bostami, Chittagong, Chittagong	AAXTGGXXTXGACXNGCAXXTXXAXXXCCTXGTCTXAXTGXAXXTATAXXXGGXCGXAXXTXGACXCTXAXXCXXGGGTCATAAACATTCTTATTACAXAC
555158	Chittagong Cantonment (CMH); Bayejid Bostami, Chittagong, Chittagong	AAXTGGTXTXGXCXXGCXXXTXXAXXXCXXXGTCTXAXTGXAXXTATAXXXGGXTGXAGXTXGXCXCXXAXXCXXGXGTCAXAAACATTCTTATTACAXAC
555161	Alikadam Upazila Health Complex; Alikadam, Bandarban, Chittagong	GGGCAGTATXGATXTGCGTCAGTGGTXGTCTXCCTCAXTGAATTTAAGCAXGGXCGTAXACTAACACCATAXCXXGGCTTCXAAATAACXCCACTACAAAT
555166	Alikadam Upazila Health Complex; Alikadam, Bandarban, Chittagong	AAXTGGCACXAACXTGTGAATGTGGTAGCTAACCATGTCGCACTTAAGAGXAGXTAGGXCTXGGTGCTGTCXCXXAGXTTCXAAACGXXATCATTTTGAGT
555172	Alikadam Upazila Health Complex; Alikadam, Bandarban, Chittagong	GAXTAGTATGAACXTGTAXCAXXGGTNCCCAACTTXGXCGCTTTTGTACXXAGXTGGAXACXAGTAATXTCXGXXGGCTTAGAAACGATATCACTACAGAT
555174	Alikadam Upazila Health Complex; Alikadam, Bandarban, Chittagong	GGXNGNTXTGAACGCNCAXAAXGNNXGCCCTGNTNXAXCNCANXNATAXXXAAXCGXAXCCXGGNXNXNTAXNXXAACTCCXAGATAACCNNNCTNCAANT
555175	Alikadam Upazila Health Complex; Alikadam, Bandarban, Chittagong	ANXNAACGTGGANGTNCGXCAGTNGNANNNAATCTCAXNNNNTXCAAGAXXANXTGGAXNCXANTGCNXTCXCXXGGNNCNXANNTATNXCCATTACANAT
555176	Alikadam Upazila Health Complex; Alikadam, Bandarban, Chittagong	GAXCAATXCGGACGTGTAXAAXXAGCGGTTTACTAXGXTGCATXTAAXXXXAGXCGXGXACXAGCXCXATAXGXXAGGTTCXAACTATCXTCGCTACAGAC
555177	Alikadam Upazila Health Complex; Alikadam, Bandarban, Chittagong	AAXCGATACGGGTXCGTATATGXGGTGGCCTGTCTCAXCCCATACATACGXAGXCAGGXACTGGCACCGTCXCXXGGGTCAGAAACAATACCGCTATAGGT
555179	Alikadam Upazila Health Complex; Alikadam, Bandarban, Chittagong	AGXTAGTXNGGNTGNNTNXAAXXGGTGNCNNGTTAXAXNNCNTXTANXXXXAGXNAXAXCTXNNCXATXNXXCXXGAGTNNGNAACGACCTCNNTTNNANT
555180	Alikadam Upazila Health Complex; Alikadam, Bandarban, Chittagong	GGXCGATGCGGGTGCGCAXAAGTAATGGCTTATTTXAXCGAATACAAGCAXAAXCGGGXCCAGGTXCCAACXGXXAGGTCAXAACCGACATCATTTTAAAT
555181	Alikadam Upazila Health Complex; Alikadam, Bandarban, Chittagong	XXXXXXXXXXXXXXXXXXXXAGTAGCGGTCTATCTXAXCGCATTTGTACXXAGXCAGAXACXGGCXACATAXCXXAAGTCAGAGCTGATACCGTTACAGAT
555182	Dulyatali BRAC Office; Lakshmichhari, Khagrachhari, Chittagong	GGTXAGTATXGACGCGTAAXATTGGTGGCTTACCACGTCXCTCXTGTAAXAAGGCATGXACTGGCACTGTCCCXCAAGTTAXAGACAXCCCTGCTTCAGGT
555183	Alikadam Upazila Health Complex; Alikadam, Bandarban, Chittagong	AGXNNNCGTGAANGCGTNXXAXTNGNANNNTNNNNXNXNNCNCXTANGCXXANXCGXGXACXGNXXCNNTCXCXXGGNNNAXANANATCANCGCNACNNNC
555184	Dulyatali BRAC Office; Lakshmichhari, Khagrachhari, Chittagong	GGTXGGTGTXAACCCGTGTXAXTGATACCTTGTCTCAATXATTTTAAGAAGAGGCAGACCCAGGCGCTATACCTCAAGTCAXAAACGXTCCTGCTTCGAGT
555185	BRAC (BHP) -Laxmichari; Lakshmichhari, Khagrachhari, Chittagong	GGXTGACGTXGATGTGTAACAGTAGTACCTTACXTCATCGCTTTCATAAGXAGXCATGXACXGGCGATGAAXCXXXXXXXXXXXXXXXXXXXXXXXXXXXX
555186	BRAC (BHP) -Laxmichari; Lakshmichhari, Khagrachhari, Chittagong	GAXNANTXTXANNCXGCGXATXGGXXGCCNTANCAXAXCNCNCXCATXXXXAXXXNXAXXTXGGCXXCXTXXCXXNGNTCCGAAATNANNNCNCTACNXNT
555187	Dulyatali BRAC Office; Lakshmichhari, Khagrachhari, Chittagong	GGTXGGTGTXAACCCGTGTXAGTGATACCTTGTCTCAATXATTTTAAGAAGAGGCAGACCCAGGCGCTATACCTCAAGTCAXAAACGXTCCTGCTTCGAGT
555189	Dulyatali BRAC Office; Lakshmichhari, Khagrachhari, Chittagong	GGTXAACGCXGACCTGTATXATGGGTGGCTAACCACATCXCATTTAAACGAGGGCATAXATAGGTACCGAAACTAAAGTTCXAGACAXCACTGCTTCAAAC
555190	Dulyatali BRAC Office; Lakshmichhari, Khagrachhari, Chittagong	AAGXGATGTXGATCCGTAAXAXTGATGCCTTGTCTCAACXCTCTTGTGCGGAAACAGAGATAGATGATATAACCAGGGTTAXAACTAXCCCCGCTTCAAGT
555191	BRAC (BHP) -Laxmichari; Lakshmichhari, Khagrachhari, Chittagong	GGXTGACACXGACGXGTGXATGTXGTXCCTTACTTXAXTCCATATGTGCXXAGXTAXGXACXAGCAAXAAAXCXXAGGTTAXAGACAXCCTCGTTACAXGT
555192	BRAC (BHP) -Laxmichari; Lakshmichhari, Khagrachhari, Chittagong	AGTTGGTGTXGATCTGTAXCATGAGCACTTTATCTCGXCGCTTXTATAAGXAGXTGGAXATTAACACTATCAGXCAAGTCAXAAACAATACCGCTATGXGC
555193	BRAC (BHP) -Laxmichari; Lakshmichhari, Khagrachhari, Chittagong	XAXCGGXXTXGACCXGTXXXATXGGXXXCCTATTAXAXCGCTXTTATAXXXAGXCGXGXATXGGXXATGTXXCXXAGCTTAXCGATATTCTCATTACAXGT
555194	Alikadam Upazila Health Complex; Alikadam, Bandarban, Chittagong	GNXCANTANGGNCGNGTAXANXXGNXANTNNGNCTXAXNNCACXTAAXCXXAGXNNXAXACXAGCXANGTAXCXXGGNNTNGAAATNNNANTNCTNNNNGT
555198	GHRONI Malaria Control Program, Tarachha, Rowangchhari; Rowangchhari, Bandarban, Chittagong	XGXNAGXXCXGXTXXGXXXXXTXXXXXCXCXAXXXXXACNXTXXTXTAXXXXGXTAXAXATXXNXXXXXAXXCXXAXXXTAXAAATGACATCXNXANAXXC
555209	BRAC (BHP) -Laxmichari; Lakshmichhari, Khagrachhari, Chittagong	ANXCANTXNXNANXXGXGXAAXXNACGXTTTGNCNXAXNCCAXTNATGCXXAAXNGTGXACXGACXANGTNXCXXGGGTCAGAGNNATCANCNCTATNXGT
555216	BRAC (BHP) -Laxmichari; Lakshmichhari, Khagrachhari, Chittagong	AAXTAGTXTGAATXCGXGXAAXXAGXGGCCTGCTTXAXCGCATXCATGXXXAGXCGGGXATXGACXCTATCXCXXAAGTTAXAGCCATCATCGCAATAAGT
555218	BRAC (BHP) -Laxmichari; Lakshmichhari, Khagrachhari, Chittagong	AGXCNGXXTXAACCXGTAXNAXXAATAGCCTACTTXGACGCTTXCAAXCGXANXCGXGXXCXGACAACGTCXCXXGGCTTAXAGACNTTACTANTATNXNT
555220	BRAC (BHP) Matiranga (2); Matiranga, Khagrachhari, Chittagong	GGTCGGCGTXGGCCTGTAXAATGXXTAXTTAGCTTTATCXAAXXCXAACGGAGGTAGAXCCTAGCACTATAXCXCXACCCCTXXXCGAXATXAXTACXXGC
555225	BRAC (BHP) -Panchhari; Panchhari, Khagrachhari, Chittagong	GGGXGXTGTXAATGTGTGTXATGGGTGCCTTGTTACATTXATTTTAAGAGGAAACGTAXACTGGCACCATACCXXGAGTCCXAGATAXCACTACTTTGAGT
555228	BRAC (BHP) -Panchhari; Panchhari, Khagrachhari, Chittagong	GGTCAGTACXGATGCCTGAAATTAGTACCCTATCTTAACCCATTTGAAAGXGGXCGXAXACTGGCGCCATCXGXXGGCTCCGAGCCGTCCCTGCAACAXGT
555229	BRAC (BHP) -Panchhari; Panchhari, Khagrachhari, Chittagong	GNTTANNGTXAACNTGNAXNXGTXXCGCXXAGCTTCAACXXAXXTANGAGAAGNNAGXXACNANNGATGTCAGXCXGCCTCGXXCXXXXXTXXXNXXXGXT
555230	BRAC (BHP) -Panchhari; Panchhari, Khagrachhari, Chittagong	GATCAACGTXAACCTGCAAATGTGGCAGCCTGCCTTAATGCATXTAAACGXAGXTAXAXATTAGCGAXATAXCXXGGGCTCTAAACATTCCCACTACAXAT
555233	BRAC (BHP) -Panchhari; Panchhari, Khagrachhari, Chittagong	AGXTAGXXTXAACXCCTXXAAXTGGXAGCCAGTTTXAXCGCATXTATAXXXAGXCAGAXXCXGACXCXXTXXCXXAACCCATAAACATTACCACATTGXAT
555234	BRAC (BHP) -Panchhari; Panchhari, Khagrachhari, Chittagong	AGXNAATGNXGNCCTGTAXAAXXGXTGCCTTGCNTXAXNGCNCXTGNACGXANXCAGAXCTXGATACCAACXNXXAACTTAXAANTGACACNNNTNCNXAN
555237	BRAC (BHP) -Panchhari; Panchhari, Khagrachhari, Chittagong	XGXNGXXXTXAACXTXXXXXAXGAGXXXXTXGCCXXXXCGCAXXTAXXXXXAGXXGXGXXCXGGCXATXXXXCXXGXGCCAGANATAXNACNGCTATAXGT
555241	BRAC (BHP) -Panchhari; Panchhari, Khagrachhari, Chittagong	AGXTGGCXCXAATGNCCGXAAXXAAXXCTCTANCAXAXCCCAXXCATXXXXANXTGXGXXCXAGTXCXXAXXGXXGGGTTATAANCAATACTGTTACAAAT
555243	BRAC (BHP) -Panchhari; Panchhari, Khagrachhari, Chittagong	GGXCAGCXCXAATGTGXATAAGTAACXCCCAGCCAXGXCGCTTTCATAAXXGAXTGXAXACXAGCGCTATAXCXXAAGTTATAGATAXCACCGTTACGGAT
555246	BRAC (BHP) -Panchhari; Panchhari, Khagrachhari, Chittagong	AAXCAGTATXAATXTGTAXXAXXGGXXXCTTACCTXAXCGXTCXTATACGXAGXTAGAXXTXGATGCXXTCXCXXGAGTCAGAAATGACACTGCTACGXAT
555252	BRAC (BHP) -Panchhari; Panchhari, Khagrachhari, Chittagong	NNGNANTNNXGNTCNGNNTNXGTGXTACTTAACXTCNACCAAXXCXNNNAGAGNNAXXXACAAACGCNAXAACXNXACCTCXXXCXGNTXTXXXTXXXXXT
555304	Sindukchhari BRAC Laboratory Office (2); Mahalchhari, Khagrachhari, Chittagong	NGTXANNNTXGANCNGTAAXAGGGNNGCCNTNNCNCAACXAANTNANNNANNGANANNCACTANNNCNATACCTNNNCNNNXNGATNXTNCCNCTTCGGGC
555305	Sindukchhari BRAC Laboratory Office (2); Mahalchhari, Khagrachhari, Chittagong	AGNXNGTGTXAATGTGTNTXNGNAGTGNCNTGTCNCNTCXCNNTNATANXNAAGTGGNGACTANNGNTATNCGTAGNCTTNXAACTGXNANNNNTTTAANT
555306	Sindukchhari BRAC Laboratory Office; Mahalchhari, Khagrachhari, Chittagong	GNGCAATXCXGNCGNGTATNNXGXGTGGNCNNCTTXNTCNCTTXTGNACAXAGXCNXNXATXGACXCNGTCXGXXGGCTCCGNNATATCXNCGCTANAAGT
555307	Sindukchhari BRAC Laboratory Office (2); Mahalchhari, Khagrachhari, Chittagong	GAGXAATGTXGACGCGCAAXAGTAGTGCCTTGTCACGTTXCACTCATAAGAAGGCAGGGACAAGCACCGAAACCCAGGTTAXAAACAXCCCCACTTCAAGT
555308	Sindukchhari BRAC Laboratory Office (2); Mahalchhari, Khagrachhari, Chittagong	AGGXGGTGCXAACGCGTAAXTTGAGCGGCCTATTATATCXCACTCATACAAAAATAGGGACTAATGCCGTCCCCAGGCTTCXCAACAXCCTCGCTTCGAAT
555309	Sindukchhari BRAC Laboratory Office; Mahalchhari, Khagrachhari, Chittagong	XXXXXXXXXXXXXXXXXXTAATGAGCGCCCAACCTXATTCCATTTAAACXXAGXCGXGXACXGGTXCXGACXCXXGGGTCAGAGACATTACCGTAACXGGT
555310	Sindukchhari BRAC Laboratory Office (2); Mahalchhari, Khagrachhari, Chittagong	GATXAATGCXGGTCCGTATXTTGAGCGCCTTGTCTCATCXATCTCATAAGGAGGTGGGGATTGGCAATGTCCGCCGACTCCXAAATGXTATCACTTTAGGT
555311	Sindukchhari BRAC Laboratory Office; Mahalchhari, Khagrachhari, Chittagong	AAXCGGTXTGGACXTGTAXAAXTGGXGGTCTATCAXAXTGCATXTATXXXXAGXTAXAXACXGGCXCTGAXXCXXGXCCTCGNAACAXCCCCATTACGXGT
555312	Sindukchhari BRAC Laboratory Office; Mahalchhari, Khagrachhari, Chittagong	GNGTANNXNXGGCXCNTNAXAXGNGXACCTAGTCNTGTTGNNNTTATXCXXANXCAXGXATXANCXNCGAXXCXXGAGTCAGAAACGACACCGCTACAXNT
555313	Sindukchhari BRAC Laboratory Office; Mahalchhari, Khagrachhari, Chittagong	AGXCANTXNXAANGCGTNXAAGGGGTGNCCAANNNXGXNGCANXCANGCXXAAXTNXGXACXANNAACANCXCXXGGCNCNGAACCNNNANTGCTTTGXGN
555315	Sindukchhari BRAC Laboratory Office; Mahalchhari, Khagrachhari, Chittagong	XAXCGGTXTXGACCTGTAXXXXXXXXXXXXXXXXXXXXXXXXXXTATACAXAGXTAXAXACXGGCACTGACXCXXGACCTCGCAACAXCCXCATTACGXGT
555316	Sindukchhari BRAC Laboratory Office; Mahalchhari, Khagrachhari, Chittagong	XXXXXXXXXXXXXXXXXXNXTXGGGXGGCTNXTCAXGXTGCATTTNTACXXGNXCGXAGACXGNTXCTGAXXNXXGXNCTATAAANATCACCGCTACAXGT
555317	Sindukchhari BRAC Laboratory Office; Mahalchhari, Khagrachhari, Chittagong	AGXCAATGTXAATNNGTNTATXXAGCGNCTNNTCAXAXNCCATXCATANAXAGXTNXAXXCTNGCXATGTCXCXXGANTCCTANNNANTANCACTATANGT
555321	Baghaichari Upazila Health Complex; Baghai Chhari, Rangamati, Chittagong	NGTXANTNNXGNCCNGTNTXATGAGCGCNNTNCCTTNTNXNNTTNNTNAGNAGNCGGNXACTAAXNACGTACNXANANTTCXAANCAXCNCNNNATCAXGT
555325	Thanchi Upazila Health Complex; Thanchi, Bandarban, Chittagong	AAGTAATGTXGATGTGTATAAGTGGTXGCCAATCATGATGCATXTATAAGAAGACGTGXATTGGTGACXTCACXAGAGTTATAGATAATATTGCTTCAAAT
555328	Thanchi Upazila Health Complex; Thanchi, Bandarban, Chittagong	GGGCGGTGTXGATGCGTGTAAGGAGCGGCCTATCATGACCCTTXCGTAAAGGGGCAGAXACAGGCACCATCCGXAGACTTCTAAACAACACTGCTACAGAT
555333	BRAC (BHP) -Dighinala; Dighinala, Khagrachhari, Chittagong	GAXCAATANXAACGNGTAAAAGGANTGCCTTATCTCNTNGCTCTTATGAAXAGXTAGAXCTAGACAANGTAXCXAGAGTCCXAACCGTNCTTACTACGGAT
555342	Dighinala Upazila Health Complex; Dighinala, Khagrachhari, Chittagong	GGXCANCXCXGNNNCCTATATTTNGTXNCNTNCNTCAANNCNCATATAAXXAGXCGNAXACXAGNAATGTCXGXXGGCNNATAAACNANCNNGCTACNXNT
555343	Dighinala Upazila Health Complex; Dighinala, Khagrachhari, Chittagong	AGXCNACGTGNATGTGCATAAGTAGCXCCTNNTNTCAXNNCNCACANGAGXANXCNGGXACAAATGCTATNXNXCAANTNAGNGANAACATCACTATAANT
555344	BRAC (BHP)-Rowangchari; Rowangchhari, Bandarban, Chittagong	NNNNNNNGNXNNNNCGNNXAAGTGXTGCXTAACTTNAACXXAXXCANNANNAGNCAGXXCTNNNCGNNGXNCCXCXGCCTCXXXXCGAXXTXXXNATXXXT
555354	BRAC (BHP) -Dighinala; Dighinala, Khagrachhari, Chittagong	GGGCAGCGTXAACGCGCAAATGXXXCGXCCAGTXACAAXGXTXXTXTGAGAXGATXGXXACTAGCAATAAACCXAXGXXXXXXXCXXXXXXXXXTXTXXXT
555355	BRAC (BHP) -Dighinala; Dighinala, Khagrachhari, Chittagong	NATCAATGNXNACNCGTNXAAGGXXTGCXTAGCXNNGAXCAAXTCATACGGNGANATAXANTNNCANTNTCNGXNXXCXXCXXXXXXTXXXXAXTXXXXXT
555361	Dighinala Upazila Health Complex; Dighinala, Khagrachhari, Chittagong	GAXCAAXXCXAACCCGXGXAAXGGGCXGTCAATCTXGATGCATTTATACAXAGXTGGAXACTGGCAACATAXGXAGGCTTAXAAATAXTATCGCTATGXAT
555362	BRAC (BHP)-Rowangchari; Rowangchhari, Bandarban, Chittagong	AGTXAGTACXGNCCCGTAAXAGGGGCACTCTGTCNCAACXCATXXXXXXXXXXXXXXXXXXXXXXXXXXXXXXXXNGGTCAXNGCCAXTXCCGCTXCNXGT
555364	BRAC (BHP) -Dighinala; Dighinala, Khagrachhari, Chittagong	GAXCGGCATGGGCXTGTGXXXXXXXXXXXXXXXXXXXXXXXXXTTGTGAGXAGXCGTAXACAGGTGCTAAAXCXXGGGTCCXAGACATTATCGCTACAAAT
555366	Sajek Brac Office; Baghai Chhari, Rangamati, Chittagong	AGTXANTGNXGGCCCNTGAXATTNGTACCTAGCCNCGTCXCTTTNAANAGNANACGTAXATAGNXAACGANACTNAGCCTNXAAANGXTATCGCTTCAAGT
555367	BRAC (BHP) -Dighinala; Dighinala, Khagrachhari, Chittagong	NNTCAATGNXNACGCGTNXAAGGAXTGCTTAGCCNNGACCAAXXCATACGGNGANATXXACTGNCANTNTNNNXCGGXXTCNXAXCATXCTXACTACGAXT
555369	BRAC (BHP) -Barkal; Barkal, Rangamati, Chittagong	AGGXAACATXGGCCCGTAAXTTTGGCAGCCTATTTCAACXCTTACAAGAGAAAACGGGXACTGGTACCGTAACXCGGGCCCXAACCAXTATCACTTCAAGT
555371	BRAC (BHP) -Dighinala; Dighinala, Khagrachhari, Chittagong	GGXNAGCXTXGNCCCGTAXCAXGGXXGCCTTNCCTXGXNNCAXXTNTAXAXNGXCNGGGANXAACXACGTXXCXXGXCNTNTAAACNTTCNCGCTANAXNT
555373	BRAC (BHP)-Rowangchari; Rowangchhari, Bandarban, Chittagong	GGGXGGTGTXAATGTGTATXAXTAGCACCTTGTTTCGTCXATTTTGAGAAAAGACGGGXACTGAXAACGTACGXAGGCTCAXAAACGXCXCCACTXCAXGT
555375	BRAC (BHP) -Dighinala; Dighinala, Khagrachhari, Chittagong	XAXTGACXTXGACXTGTXXAAXXXGXXGCTTGCCXXAXTGCTXXCATXXXXAGXXGXGXXCXGGXXCXXTXXCXXAXGTTAXAAACGATACCATTACAXAT
555378	BRAC (BHP) -Dighinala; Dighinala, Khagrachhari, Chittagong	GAXTAATGCGAATGCGXATAAGGAATGGCTAATCATAXCGCATTTGAGCGXAAXCXGAXATXAGTAAXGACXCXCGGGTTAXAGATAACATCATTACAXGT
555379	BRAC (BHP)-Naikhongchhari; Naikhongchhari, Bandarban, Chittagong	AGGXAACATXGACCCGTATXAXTAGCAGCCTACTTCGACXAATTCATACGAAGACGTAXATTXGCAATGACACCAAGGCTCXAAACGXTACCGTTXCAAGT
555382	Sajek Brac Office; Baghai Chhari, Rangamati, Chittagong	AGGXAGTGTXGGCCCCTNAXATTGGTACCTANCNNCGTNXCNTXNAANAGGAGANGNAXANAGNCANCGAANCXCAGCCTNXAAATGXTANCGCTTCNAGT
555383	Alikadam Upazila Health Complex; Alikadam, Bandarban, Chittagong	GGTCAATATXGGTCTGTATCATTGXTGXXXXGCXTCAACXXAXXCAAGAAGGAACXGXXACTAACACXGXAACXAGGXXTXGXXXCAAXXTXXXAATXAXT
555384	Alikadam Upazila Health Complex; Alikadam, Bandarban, Chittagong	GAGTAGTGTGGATGTGTGACXGGGXXAXTXXGXXATGACCXAXXCXAGAAAAAACAGGXACAXGTACCAACCCXCXAXXTCXXXXTXTXCTXXXTXXXXXT
555385	Baghaichari Upazila Health Complex; Baghai Chhari, Rangamati, Chittagong	NNTXNNTATXAATNCGNAAXNXNGGNGNCNNATNNCNNCXNNTXTGTNCGNNGACGGGXATANNCNNTGNNACXAGANNTNXNNNNNXCNNNNNNXTNXNT
555387	BRAC (BHP) -Dighinala; Dighinala, Khagrachhari, Chittagong	AGTTAGTGTXAACCTGTGXAAXTGGCGXCCAATCTTGXCGCTXTCATGAGXAAXCGXGXACTGACACTGTCXCXXAACTCAGAACCAACATCGTATTGXAC
555391	Chillchari Brac Office; Jurai Chhari, Rangamati, Chittagong	GGGXAATGTXGGCCCGCATXTXXGGTACCTAACTTTGTCXAATTTAAGAGGAGATAGGXCCTAACACTGTAACXAAAGTTAXAAACGXCATCACTXCGGAT
555395	BRAC (BHP)-Rowangchari; Rowangchhari, Bandarban, Chittagong	AGTTGGTGTXGATCCCTGTAAGTGXCGXXXXAXXTTAACCATXXCAAGCGGAGGCAGAXACAXACACCGTAACXAXGXXCXXXXCCGAXXTXXXAXXXGXT
555396	Thanchi Upazila Health Complex; Thanchi, Bandarban, Chittagong	AGGXAATACXGGCCTGTGTXAGTGGXGCCTTGTCACGTXXCTTTTAAXCGGAGGCGGGXXCAGACXCTGTACCXAAGXTTAXAAATAXTXXCAXTXTXAGT
555397	Sajek Brac Office; Baghai Chhari, Rangamati, Chittagong	AGTXAATGNXGACCTGTAAXAGTGGNACCTTNCCTTGATXCNTXTNTGNAANGATGNGXANTAACGACGTNACXAGNNCTCXAAANAXCNCCGNTTTAGGT
555398	BRAC (BHP) -Dighinala; Dighinala, Khagrachhari, Chittagong	GGXCGGCXCXGGTXCGXGXATXXGGTXCCTTXCCAXAXTCATCXTATACXXAGXCAGGXCCXGACGACGTCXCXXGAGTCAXAAACGXTACCACTACAXAT
555399	BRAC (BHP) -Dighinala; Dighinala, Khagrachhari, Chittagong	XGXCAGCXTGGATXCCTAXAAXTGGXXGTCAATCTXAXCCATXXCGAXXXXXGXTAXAXACXGGXXXXGTXXCXXGXGTTAGAGACATCACCACXATAXAT
555401	Lakshmichari Upazila Health Complex; Lakshmichhari, Khagrachhari, Chittagong	GGXCAGXXTXAACGXGTAXAAXXGGCGXTTTACCAXAXCGCATXTGTAXXXAGXCGTAXXCXGGCXCTGTXXCXXAAGTCATAGCCATCATCACTATGXGT
555402	BRAC (BHP) -Dighinala; Dighinala, Khagrachhari, Chittagong	GATCAATACXAACGTGTAAAAGGAXTGXCTTATCTCAXTGCTCTTATGAAXAGXTAGAXCTAGACAATGTAXCXAGAGTCCXAACCGXCCTTACTACGGAT
555404	BRAC (BHP) -Dighinala; Dighinala, Khagrachhari, Chittagong	AGTNGNCATGGATXCGTGXAATXGGTAGCNNANCTXGXCGNTTTTATGCAXAGXTGGGXATXNATGCCGAAXCXXGGCCTCGANNTAANCCTGCTACGANT
555405	Baghaichari Upazila Health Complex; Baghai Chhari, Rangamati, Chittagong	GAGXGGTATXAGCCTGTGTXTGGAGTGCCTAGTCTTATCXCXTACGAGXGAGGATGTGXACTGGCACTATCCCXAGGCTCAXAACCGXTACTGCATTGGAT
555407	BRAC (BHP) -Dighinala; Dighinala, Khagrachhari, Chittagong	GGXCGGCGTGAATXCGTAXCAXGGGTGGCCAGTTAXGXCCCTCTTATACGXAGXCATGXACXGACGATATAXCXXGAGTTAGAGATATCCCCGCTATAGGT
555410	Dighinala Upazila Health Complex; Dighinala, Khagrachhari, Chittagong	AGTCANCATXAANCCGNNTNAGTNGTXCTNTNTNTCAXTGCTCTNATGAXXAAXNNGGXATTNGCGANATCXCXAGANCCAGAANNNNNCNTNCNNTNGGT
555413	Dighinala Upazila Health Complex; Dighinala, Khagrachhari, Chittagong	AGXCGGTGCGAATGCCTGTATTGAATGGCTTGTCATGACGATTTCAAACAXAGXCATAXATXAGTACTGTCXCXCGAGTCAGAACTGACACCGCTACAGGT
555416	BRAC (BHP) -Dighinala; Dighinala, Khagrachhari, Chittagong	XGXNAGCXCXXACXCGXAXXAXXGGXGCXTTGCCXXGXNCCXXXTNTAXXXGGXCGXGXXTXAACXXCGXXXCXXGXCTTCGAAAXATTANCGCTATAXGT
555418	Sajek Brac Office; Baghai Chhari, Rangamati, Chittagong	XGXXXGTXTXGXXXCXTXAXAXTGGXXCCTTXXTAXXATXATXXTXTACAGAAXXXXXXXCXGAXGCTATAAXXAXXXXTAXXGATGXCXCCXTTXTGAGT
555419	Alikadam Upazila Health Complex; Alikadam, Bandarban, Chittagong	GGNTANNNNXGNCNNGTNXNANGGACGCXXAGCXNNNACXAAXXTGAANGNAGANATXXCNNGNNGATGTNACXNXGXXTXGXGXNAAXXXXAXNACXAAN
555423	Ramu Upazila Health Complex; Ramu, Cox's Bazar, Chittagong	GGXCGATGTXGACCTGCAXAAXXAGTXXCXTGTCTXAXTGCAXXXXXXXXXXXXXXXXXXXXXXXXXXXXXXXXXAAGTCAXAAATATCCCCGTTACGXGT
555425	Ramu Upazila Health Complex; Ramu, Cox's Bazar, Chittagong	GGXTAGTXCXAGCXCGCGXXAXXAGXXXTCTGCCAXAXCCCAXXTAAXXXXAGXTGXAXXCXGAXXCTGTXXCXXAAGTTAGAGATATCCTCACTTCAXAT
555427	BRAC (BHP) -Dighinala; Dighinala, Khagrachhari, Chittagong	GGTTANCATGNGTCCGCAAAATGGXTGXTXAGXTTCATXCXXXXTATAAAGANACAGGXACAGGTAATGTNACXCXGCCXXXXXXTGAXXXXXXTATXGXC
555428	Matiranga Upazila Health Complex; Matiranga, Khagrachhari, Chittagong	AGXTAGTATXGACGTGTAAAATTAGTGCCCXACCTTATCCCTTTTATGAGXAGXCGGAXATTGGCGCTGTACCXXAAGTCCGAGCTAACATCATTATAXGT
555432	Naikhongchhari, Ghumdum BRAC office; Naikhongchhari, Bandarban, Chittagong	AGGTAGTACXGACCCGTAAAATGGATGXCTAACCTTGACCCATXCATACGGAGACGGAXACTAATGACATAAGXCAAGTCCTAAATGACATCATTATAAAT
555437	Matiranga Upazila Health Complex; Matiranga, Khagrachhari, Chittagong	GGXTAATATXAGNGCGCAXAAXGNXTGCTCTACCTXAXCCXTXTTANGNGXAGXTGNAXANTGGCNCTAANACXCNNGTCNGANATAANCTNGNTACAXAT
555439	Matiranga Upazila Health Complex; Matiranga, Khagrachhari, Chittagong	AGTNANCGCXGACXTGTAXNAGGAGTXNCTAATCTTAXTCCTTTTAAAAXXAGXCNXAXACXGGXGXTATAXCXXGGGTTAGAAACAACXTCGCTATAXGN
555441	Ruma Upazila Health Complex; Ruma, Bandarban, Chittagong	AGGCAATGTXAGCCCGTATAAGTAGCGCCCTGTCTCGTTGCATXCAAACAGAGACAGGXACTGGTGACATCACXAAAGTCAXAAATGACACCATTATAGAT
555444	Matiranga Upazila Health Complex; Matiranga, Khagrachhari, Chittagong	GAXTGATXTXGGTCCGTAXATXXGGTGCCTTGTCAXGXCGXACTTATGAGXGGXTGGAXACAAGCACTGTCACXXGAGTCATAGCTATTACCACTACGXAT
555445	Lakshmichari Upazila Health Complex; Lakshmichhari, Khagrachhari, Chittagong	AGXCAATGTXAATGCCTGXAAXGAGCXCTTAGTCAXAXTCCACATAAGAAXAXXCGTAXACAGATAAXGTCCCXCAGCTTCTAGATAACCTCGCTACAGAT
555446	Lakshmichari Upazila Health Complex; Lakshmichhari, Khagrachhari, Chittagong	AAXCAACXTGGACGCGTGXAAXGGGTAGCTTATCAXGXCGCATTTAAAAXXAAXCGXAXACXGGTXATATAXCXXGGGCCCGAGCTATTACCAXTACAAAX
555455	Matiranga Upazila Health Complex; Matiranga, Khagrachhari, Chittagong	AGXTAGCGTXAGTGCGTAXCATXGGTGXCCXGCCATAXCGCAXTTATACAXAAXTAGAXCCTGACACXAAAXGXXGGGTTCTAGACAACACCGCTACAXGT
555462	Lakshmichari Upazila Health Complex; Lakshmichhari, Khagrachhari, Chittagong	XXXXXXXXXXXXXXXXXXXCATGGATGXCTTGTCTXAXTCCTXTTAAGAAXGGXCAGAGCCTGACGCXAACXGXXAAGCCCTAAACGACATCGCTACGXGT
555464	Ramu Upazila Health Complex; Ramu, Cox's Bazar, Chittagong	AGXTGGCGTXAACGCGTAXATXXAXCXCCTTATCTXGXTGXTXXCATACAXAGXTGXAXACAGGCACTGTCXCXXGAGTTCGAAACGATCTTGTTACGXGT
555468	Ramu Upazila Health Complex; Ramu, Cox's Bazar, Chittagong	GNXCGGCXNXNACCNNTNTAAGTGGNACCCTNCNNCGXCNCNTTTNTANGXANXTGXGXCCXNGNGANGTCXCXXGGGNCNTANANAATATCGTTACNXGC
555469	Ramu Upazila Health Complex; Ramu, Cox's Bazar, Chittagong	AGTTGGCGCXGACCTGTGTAATTAGTXXCCTGTTTCAACGAATATAAGAAXGGXCATAXACTGGCACTGTCCCXCGGCTTCGAGACAATACCGCTATGXAT
555475	Matiranga Upazila Health Complex; Matiranga, Khagrachhari, Chittagong	ANGCNGTGTXNANCCGTNXCATGAACGCNTAGTNNXGXCNCNCTTANGAAXANXCNGGXANTNGNAANGTNXCXXAGNTTNTAAACNACANCANTACAXNT
555487	Matiranga Upazila Health Complex; Matiranga, Khagrachhari, Chittagong	AGGCAATATXGGCCTGTATAATGAGTGNCTNACCTTAXTNCATATATGCAXGGXTGTAXXCTAACACTGANXCXXGGGTCATAAATAANATCATTACGXGT
555488	Matiranga Upazila Health Complex; Matiranga, Khagrachhari, Chittagong	AGXCGGCACXAACGTGCATATGTGGTGCCTTGTCATAACGXTXXTATGAAXAGXCGTAXATXAGTGATXTCXGXXGGGTTCTAGATAACACTGCTACAGAT
555495	Thanchi Upazila Health Complex; Thanchi, Bandarban, Chittagong	GAXCAGTATXGXCGTGCAXAATTGGTGCTXTGTTTTGXCGCTTXXXXXXXXXXXXXXXXXXXXXXXXXXXXXXXXAGGTTCXAGACAACACTGCTTCAGAT
555497	Matiranga Upazila Health Complex; Matiranga, Khagrachhari, Chittagong	AGGCAATATXGATGCGXATATGTAGTGCCTXGCCTTGXCGXAXTTATACAXAGXCAGAXACTGGCAATATCXCXCGGCTTATAAACATCATCGCTACAAGT
555499	BRAC (BHP) -Dighinala; Dighinala, Khagrachhari, Chittagong	AGXCAGTGTGAACGTGTATCAXXGATXCCTAGTCTCAXTGCATTCAAXAGXAAXTGXAXACXGATGCTGTCXCXXGGCTTAGAAACAXTACCACTTTAAAT
555502	Matiranga Upazila Health Complex; Matiranga, Khagrachhari, Chittagong	GGTCGGTACXAATCCGCATCAGXGATAXTXAGTXTCATXXXAXXCATGCGAAGATGGAXCTTAACGCTGTACCXAGAXXCXTXAXCATXXTXXXAACXAXT
555504	Chakaria Upazila Health Complex; Chakaria, Cox's Bazar, Chittagong	GNXCNAXXNXNANNTGXAXAAXXGGCXNNTNGCCNXAXCNNAXATATNAGXAAXNGNGXANXGGXNCCAACXCXANGCNNAXANNCAXCATCNCTANGXAT
555514	Ramu Mukti Office; Ramu, Cox's Bazar, Chittagong	AGXTAGTACGGACXCCCAXXAXTGGTXCCTTACTAXGXCGATTACATACXXAGXCGXAXACXAATAATATCXCXCGGCTTAGAAACGATACCGCTATAXGT
555522	Ramu Mukti Office; Ramu, Cox's Bazar, Chittagong	XNXTANTATGGACGTNXGXATXTAGCGNCNAATNAXAXCGCTTXCGNGCXXANXNGXAXACXGNCXNXGTCXCXXNXNTNAGANNNATCACXGCTANAXGT
555525	Ramu Mukti Office; Ramu, Cox's Bazar, Chittagong	GGXCGGTACGNANXTCTAXAAXXANCXGTNTATTTCGXCNCNTTCGAAAAXAAXTGXGXCCXGGXGNXATAXGXXGGCTTNGAGANNANCCTGCTNNAXAT
555526	Ramu Upazila Health Complex; Ramu, Cox's Bazar, Chittagong	XNXCGAXXTXGGCXXCTXXAAXXGGXGCCTTGNCTXAXCCXAXXCGTXXXXGGXCNXAXXCXGGCXCTXAXXGXXAXGTNCTAGACATCCTNGNTACGXNT
555527	Naikhongchhari, Baishari BRAC office; Naikhongchhari, Bandarban, Chittagong	AAXCGACXCXAATCTGTGXCAXGAGTXGCTAGTCTXGACGAACTTATGCXXGGXTGGAXACTAACGATGTAXCXAAGGTTCXAAATGXCACCGCAACAXGT
555528	Naikhongchhari, Baishari BRAC office; Naikhongchhari, Bandarban, Chittagong	AGTXAGTACXGGCCCGTAAXAGGGGCACTCTGTCTCAACXCATTTAAGCAAAGACGGAXACTAGCGCTAACCCTCAGGTTAXAGCCAXTACCGCTXCGAGT
555530	Ramu Mukti Office; Ramu, Cox's Bazar, Chittagong	NNXNAACANGGATGNGXNXNAGNNANANNNNGTNNNNANCNNCNTNAGNAXNNXNGGAXCCTNNTAACNTNXCXCGNNTTAXANCNANNANCNTTNNAXNC
555531	Naikhongchhari, Baishari BRAC office; Naikhongchhari, Bandarban, Chittagong	AGXTAAXGTXAACCCGTATAAGTGGTAGCTTATTACAATGAACXTATGAAXAGXXAGGXCCTGGCACTGTCCCXCAGGTTAXAAACATCCCCGTTATGXAT
555533	Ramu Upazila Health Complex; Ramu, Cox's Bazar, Chittagong	XGXNXAXXTXXACXXGXXXXAXXAXXGXXCXXCCXXXXNXCAXTTAXXXXXXGXXNXNXXTXNACXNNXTXXCXXGXNTTATNAATAACCNCACXNNAXGT
555534	Ramu Mukti Office; Ramu, Cox's Bazar, Chittagong	GGXCAAXXTXGACXCGXXXXAXXAGTXCTTTATTAXAXCGCACTCATAAAXAAXCGGAXACTGACGCTATAACXCAGGTTCXAGATGXTXCTGCTACGXGT
555538	Naikhongchhari, Baishari BRAC office; Naikhongchhari, Bandarban, Chittagong	AGXTGGTATXGNCGNGXAAATGGGGTXGCCTGTCNCAXNGCATTTAAAAAXGNXNGTGXACTGGCGCNGTNXCXCGGGTCATAGATATCATCNCTATGGGT
555540	Ramu Upazila Health Complex; Ramu, Cox's Bazar, Chittagong	AGXTAGTXTXGACXXGXAXAAXTAGCXGCXTGTCTXGXCGCATTTATAXXXAXXCGXAXXCXAACXCTGTXXCXXGACTTCGAAATAXCACCATTACAXGT
555542	Naikhongchhari, Baishari BRAC office; Naikhongchhari, Bandarban, Chittagong	AGTCNGCATXGANNNNTNXXXXXXXXXXXXXXXXXXXXXXXXXTCATGCGXANXTNTAXNTTANCACTNNNXCXAGGGNCATAANTATCANCGTTTCNAAT
555543	Ramu Mukti Office; Ramu, Cox's Bazar, Chittagong	AGTTAACGTXAACXCGXGXAAGGAATGCCCTGCXAXAXCCCTXTTATXCXXXGXTGGXXATXXAXAXTAXCXCXCAGCTCAXCAATAACATTGTTACGXGC
555546	Ramu Mukti Office; Ramu, Cox's Bazar, Chittagong	NAXNNAXANXGATXCNTNXNAXTNGNGNNTANTNTXGXNCCATTXGAGNXXAGXTGNXXNCTGNCGCCATNXCXANGGNCNXNANTNNCANNNCNANGXGC
555550	Matiranga Upazila Health Complex; Matiranga, Khagrachhari, Chittagong	GAXCGNXXTXNGCCNGNGXATXTGXCXCCTTGTCAXGXCGCAXTCAAGCGXAAXNNGAXACTAGCAAXGACXCXXGAGTNCXAAATAATACNANTACAXGT
555553	Ramu Upazila Health Complex; Ramu, Cox's Bazar, Chittagong	GGXCGATGTXGACCTGCAXAAXXAXTXGCTTGTCTXAXTGCAXXTATAAXXAAXTGXAXACXAACACTXAXXCXXAAGTCAXAAATATCCCCGTTACGXGT
555554	Ruma Upazila Health Complex; Ruma, Bandarban, Chittagong	AGGTGGTATXGGTCTGTAAAAGTAGCGGTTAGCTATATCGAATXCAAACAAAGACGGGXACTGACACTGTCCCXCGGGCTATCGACATTATCGCTATGAAC
555556	Naikhongchhari, Baishari BRAC office; Naikhongchhari, Bandarban, Chittagong	AGGTAACATXGGCCTGTAACTGTAATXCXTTGCTATGXCGXTXTCATGAAXGAXCATAXACTAACGCCATCXGXCGGGTTCGAAACAATATCGTTATGGGT
555561	Ramu Upazila Health Complex; Ramu, Cox's Bazar, Chittagong	GGXTAGCXTXGACCCGXXXXAXXAGCXGCTTGCTAXGACGCTTXCAAAAXXAAXCGTAXCCTGACGCCATCXCXXGGCTTAXAAATAXCATCGCTACGAAT
555562	Ramu Upazila Health Complex; Ramu, Cox's Bazar, Chittagong	GAXNAGXXTXAATGXGTXXXXXXXXXXXXXXXXXXXXXXXXXXXTAAXXXXAGXCGXAXXNXGGCXAXXTXXCXXNGCTTCXANCTGATANTGCTACAXNC
555563	Naikhongchhari, Baishari BRAC office; Naikhongchhari, Bandarban, Chittagong	AGTTAACATXAACGTCTAAAAGTGGTGXCTTGCCACAACGXAXTTATACAXGGXCGTGXCCTGGCGXCGTCXCXCAAGTTAGAGACATCATCGCTACGGGC
555568	Naikhongchhari, Ghumdum BRAC office; Naikhongchhari, Bandarban, Chittagong	GGGCGGTATXGACCCGTAAAATTGACGGCTTGTCACGACGCATXTATAAGGGGATGGAXACAAACGCCAAAACXCAGGCCAGAAACATCATTGCTACGGAT
555569	Alikadam Upazila Health Complex; Alikadam, Bandarban, Chittagong	GATCAATGTGAACCTGTGTAXGGXXCGXXXXAXTACAACXXAXXXXTGAXGAAGCXXXXACTXACACTGXXXXXAAGCXTXTXXXCGTXXXXAXTATGAAT
555570	BRAC (BHP) -Laxmichari; Lakshmichhari, Khagrachhari, Chittagong	AGXCGACGTXAATXCCTAXAAXGAATXCCCTGTCTXGXCGCTCTTAAGAXXAGXCAXGXCTXGAXXCXGTAXCXXGXGCTCXAAACGACACCGTTACGXAT
555571	BRAC (BHP) -Laxmichari; Lakshmichhari, Khagrachhari, Chittagong	GAXCAGCXCXGATCCGTAAATGTAGTGCCTTATCAXAXTGCATXTAAGXGXAAXTGGAXACXAGTACTXTCXCXXGAGCTCGAAATAXCCTCACTTCGXGT
555573	Lakshmichari Upazila Health Complex; Lakshmichhari, Khagrachhari, Chittagong	AGXTAXXXTXGGTXXGTXXAAXXAAXGXXTXGTCAXAXTCCAXXTATAXGXAGXTGGGXXCXGACXCCGTXXCXXGACTTCGAACCAACACCACTACGXAT
555578	BRAC (BHP) -Dighinala; Dighinala, Khagrachhari, Chittagong	NGXNGNCXTXGGNNNGTAXCAXXNGCGCCNTNNCTCNXCGCTTXCANANNXAGXNAGAXNCXGGCAATGTNXCXXGAGTCCTANACATTATCNNNANAXNT
555582	Ruma Upazila Health Complex; Ruma, Bandarban, Chittagong	AGNTNNNATXGANNNGTATNATNANCANCTTGCNATNTCGCNTXTGAGCGAGGNCGGAGCTNGACNCCATNCCXAANGTNNTAANCAXTATTGTTATANAT
555583	BRAC (BHP) -Dighinala; Dighinala, Khagrachhari, Chittagong	NNTNGNCGTXGGNNNGTAACNTXNGCGCCNTNNCTXGXCGNTTXCANXCNXAGXNAXAXXCXGGCAATGTCXCXXGAGTCCTANACATTATCNNNANAXNT
555585	BRAC (BHP) -Laxmichari; Lakshmichhari, Khagrachhari, Chittagong	AGXTAGCXCXAATGCGTAXAAXGAAXGXCCTATCAXAXCGCACTCAAGCGXAXXCGGGXACXAGTGCTGACCGXXGGGTTCGAAACATTCCCGTTATGXAC
555586	Lakshmichari Upazila Health Complex; Lakshmichhari, Khagrachhari, Chittagong	AGXTAATXTXAATGCCXAXAAXXGXCGXTTXGXCAXGXTCXTXXTAAXXGXAGXCGTAXACXAACACXGACXCXXAGCTCAXAGACATCCTCATTACGXAT
555592	Ramu Upazila Health Complex (1); Ramu, Cox's Bazar, Chittagong	AGGXAGNGNXGACCCGTAAXAXGANTGNCNAACNTTGACXCATXCATACAGAGACGGAXCCTNAXGAXGTACGXAAAGTNAXANATNXCACCANTXTAXAT
555593	Ramu Upazila Health Complex (1); Ramu, Cox's Bazar, Chittagong	GGGTAATGTXAATGCGCGAAATTAATGGCCAGTCATATCCCATXCGTAAAAAGACGGGXACTGGTGCTATAACXCGGCTCCTAAACATCCTCGCTACGGAT
555595	Lakshmichari Upazila Health Complex; Lakshmichhari, Khagrachhari, Chittagong	AGGTAAXXTXGACXCGXXXXAXXGGTXCTTTACCAXAXCGCAXTCGAGCGXAAXTGGAXACXGGCACTATAACXXAGCTTCGAAACAACACCACTTCAAAT
555601	Thanchi Upazila Health Complex; Thanchi, Bandarban, Chittagong	ANGXNNNNTXGNCCCGTNTXNGTGNNGNTCTACCNTNATXCNCTNATNAGNANANGGGXACTGATGCTGTACCNNANNTCNXAGACNXCANCNCTXCGGNT
555603	Ramu Upazila Health Complex; Ramu, Cox's Bazar, Chittagong	GAXCGGXXCXGATXTGXGTAATXGACXCCTTGTTAXGXCGCTTXTGAXAXXAGXTAXAXATXGGXXCTGACXGXXGGCCTCGAAACATCACTACTATGGAT
555604	Lakshmichari Upazila Health Complex; Lakshmichhari, Khagrachhari, Chittagong	GGXTGATXTXGACGXGTAXAAGXXGXGCCTTATTAXGXTGCTXTCATGXAXAAXCGGGXACXAACAAXGAAXCXXAGGCTAXAGCTGATACCACTACAXGT
555605	Ramu Upazila Health Complex (1); Ramu, Cox's Bazar, Chittagong	XATTGATACXXGCXTCTAAAAGGAGXACXCAGCTTXAACCCTXXTGTGXGAAAXCXGXXACTXGCGCTGXAXCXCAGCCCCTXGCTAXXCXXXXTTTGGAT
555610	Ramu Upazila Health Complex (1); Ramu, Cox's Bazar, Chittagong	AGTXXGCGTXGATCTCTAXXXGGGXTXXCCTAXTATGACXATXACATGAAAAAACGGGXACTAACACCGTCCCXAAAGCCAXAGACAXCCTTACTXCGAAT
555612	Thanchi Upazila Health Complex; Thanchi, Bandarban, Chittagong	NGNTAANNNXAATNTCTNTAANGNGCGGNCNNTCANNNCGNNNXTATNAANAGNCNGNXATNANCNNTNAANCXAGGGTCNNANNTNXCACCANTNCANGT
555613	Lakshmichari Upazila Health Complex; Lakshmichhari, Khagrachhari, Chittagong	GGGCAGXXCXAACCCGXAXXAGXAGCAGCTAGCTTXGACCATCXTATAAXXAGXCAGAXACAGGTGCTATAACXXAGCTCAXCACTATCATTGCTACGAAT
555614	BRAC (BHP)-Ruma; Ruma, Bandarban, Chittagong	AAGXAGTATXGACGCGCATXTGTGGTACTCTATTACGACXCATTTATGAAAAAATGGGXACAXGCACCAACCCCAAGGTCAXAACCAXTATCATTXTAGGT
555617	BRAC (BHP) Matiranga (1); Matiranga, Khagrachhari, Chittagong	GGTXAGCGCXGATCCCTGAXAXGAATAGTTTGTTATATCXATTTTAAAAGAAGGCAGAGCCTAACACCATAAGTCAACCTAXAGCCAXCATCGCTTCAGAT
555619	Ruma Upazila Health Complex; Ruma, Bandarban, Chittagong	AGTTGGCGTXGGCCCGTATAAGTGGTGGCCAGTTACAATCCTTXTATGAAGAGACGGAXACAAGCACTAACCCXAAGGTTCGAAACATCACCGCTACAGGT
555621	Ruma Upazila Health Complex; Ruma, Bandarban, Chittagong	AAGCAGTATXGACGCGCATATGTGGTACTCTATTACGACGCATXTATGAAAAAATGGGXACAGGCACCAACCCXAAGGTCATAACCAXTATCATTATAGGT
555624	Thanchi Upazila Health Complex; Thanchi, Bandarban, Chittagong	XXXXGXTXCXGXCCTXXXXXXXXXAXXXTXXGXXTXXXXXXXXXXXXXXGXXGAXXXAXXXXXXTGXXXXXXXXXXXXTTXXXGXXXXXXCCAXXXXXXAX
555625	BRAC (BHP) Matiranga (1); Matiranga, Khagrachhari, Chittagong	XAGXXXTXCXXAXCCNXXAXXXXGNTNGXXANXTTTGACXCXXXCXTGXXXAXAXGXGGXXXXXCNXTATXXXXAGAXTCAXAXAXAXTXXTATTTTXXXC
555627	Thanchi Upazila Health Complex; Thanchi, Bandarban, Chittagong	AGGXGGTATXGATCCGXGTXAXTAACGCCTAGTTTTGTCXCATTTXAGAAGAAACAGAGACTGGTGACGTCXCCAGGGTXCXAXACAXCXXCGCTXTAGGT
555628	Lakshmichari Upazila Health Complex; Lakshmichhari, Khagrachhari, Chittagong	AAGCAACATGGACGCGTGTAATGGGTXGCTTATCACGACGCATXTAAAAXXAAXCGXAXACTGGXGATATAXCXXGGGCCCXAGCTAXTXCCATTACAAAX
555630	Ruma Upazila Health Complex; Ruma, Bandarban, Chittagong	AAGCAGTATXGACGCGCATATGXGGTACTCTATTACGACGCATXTATGAAAAAATGGGXACAGGCACCAACCCXAAGGTCATAACCAATATCATTATAGGT
555631	Ruma Upazila Health Complex; Ruma, Bandarban, Chittagong	GGGTAATATXAATCTCTGAAATGGGCGCCCTATTACATTGAATACATGAGGGGGCGGGXACTAACACCXAACCXAGGGTCCTAGATAACATCACTACGGGT
555632	Thanchi Upazila Health Complex; Thanchi, Bandarban, Chittagong	AGGTAATGTXGGCCCGTATAAGTGGTGCTCAACTTTGTCGCACXTGAACGGAGACGGAXCCTAGCGCTGAAACXCAGCCCATAAXTGATATCAXTTCAXAT
555634	Lakshmichari Upazila Health Complex; Lakshmichhari, Khagrachhari, Chittagong	XXXNXXXXXXXNCCXGXXXXAXXGGXXGXTXGXCTXXXNGXXXXTAXXXXXXXXXGXGXXCXAXXXXXXXXXGXXGXXXXATXAAXAATATXGCXXCGXGT
555637	Naikhongchhari, Ghumdum BRAC office; Naikhongchhari, Bandarban, Chittagong	AGGTAGTACXGACCCGTAAAATGGATGGCTAACCTTGACCCATXCATACGGAGACGGAXACTAATGACATAAGCCAAGTCCTAAATGACATCATTATAAAT
555639	Naikhongchhari, Ghumdum BRAC office; Naikhongchhari, Bandarban, Chittagong	GGGCGACATXGACCTCTATAATTGGTGCCCTGCTTTATTGCTTXTGTACGAAGGTGGGXATAAGCAATAACACXAAAGTCCXAACTAXTACTACTACAGGT
555640	Suwalak BRAC Laboratory Office; Bandarban Sadar, Bandarban, Chittagong	GATTAACGTXGACCTGTAACTGGAGTGGTCTGCCTCGTTGCACATGTACAAGGACGGGXATTGACACTATCACXAGAGTTCTAGACGACATCATATCGAGT
555641	Naikhongchhari, Ghumdum BRAC office; Naikhongchhari, Bandarban, Chittagong	GNTCAGCGTXGGTGTCCAXNATTNGCGGNNTACCNCNTCCNATXCAANCGAAGANNGAXACTAANNNCGTCAGXNGGGCTATANACAANNCCACNACANAT
555643	BRAC (BHP) -Rajasthali; Rajasthali, Rangamati, Chittagong	GGTXAATGTXGACGTGTATXTTGAGTAGTXTACTTTAACXAACXCATGCAGAGACAGGXXCAAGXGACATCCCXAGGGTTCXAACCAXCCTCACATCAXGT
555645	BRAC (BHP)-Thanchi; Thanchi, Bandarban, Chittagong	AAGCAATATXAATCTGCATAATTGGTACCTAGTCATGATCCTTTCGAGAGAAGACGGGXACTAGCAACGTCCCXAAACCTAXAGACGATCTTACTATAGGT
555647	BRAC (BHP) -Laxmichari; Lakshmichhari, Khagrachhari, Chittagong	GAXCAGTXTXGACCTGTAXXXXGGXXGCXTTGXCAXAXCGXAXXTATGXAXGGXCAGGXACXAGCACXXTXXCXXGACTCCTCGATGATACCGCTACGGGC
555649	BRAC (BHP) -Laxmichari; Lakshmichhari, Khagrachhari, Chittagong	GGGCGACGTXGACGTGCGXAAXGAGTXCCTTGCTAXGXCGCATXTAAACGXAGXTAGGXACXAGCGCXGTAXCXXGGCCCCTCAACGATACCACTACAXGT
555650	BRAC (BHP)-Thanchi; Thanchi, Bandarban, Chittagong	AGGCGGTATXGATGCGCAACAGTGGTACCCAATTACANCGAANXCAAACAGGGGTGTNXANTGACNNCATAXCXCAGGTTATAAACAATCNCGCTTCAAAC
555653	Suwalak BRAC Laboratory Office (2); Bandarban Sadar, Bandarban, Chittagong	XXXXGAXXTXGGCCXGTAXXAGTAGCAGTTAATXATGACXCTTXXXXXXXXXXXXXXXXXXXXXXXXXXXXXXXXGGGTTCXAAATAXCXTCATTXCGXGT
555656	Belaichari Upazila Health Complex; Belaichhari, Rangamati, Chittagong	GGTXAXTACXGACGCGTAAXATXXGTGNXNTGXNTXAXTXAXCXTAXXAGXXAXXGGNXXXXXXCACTXAXNXXANGXXXCXAGXNXXCAXCXTXTTXAGC
555659	BRAC (BHP) -Dighinala; Dighinala, Khagrachhari, Chittagong	GGNCANTATXGANGNGTAXNAGTGXCGXXXAGCTNNANCCAACXTGTNNGNAGANXXXXACTGATGCTGXAAGXCAGXXTCGXXXTATTXTTAXNXCXAXT
555660	Suwalak BRAC Laboratory Office (2); Bandarban Sadar, Bandarban, Chittagong	GGGXAGTGTXGGTCCGXGAXAGTGGCGCCTAGTCATGTCXCATTTGAAAAAAGACAGACACTGGTAACATACCCAGGGTCAXCGACGXTXTCGCTXTAGAT
555661	Suwalak BRAC Laboratory Office; Bandarban Sadar, Bandarban, Chittagong	GAGCAATGTXGGCGCCCAACTTTAGTGCCCTGCTTTGACGAATTTGAGAAGAGGTGGAXACTAACACTGTCAGXAGAGTTAGAGACGACCTCGCAACAAGT
555662	BRAC (BHP) -Dighinala; Dighinala, Khagrachhari, Chittagong	GGXTAATXTXAACGCGXAXAAXXAGCGGCNTGCCAXNXNGCATXTATAXGXAGXCGGAXCNXGGCGATXNCXGXXGACNTNGAAACAATCCCGCTATAXNC
555664	BRAC (BHP) -Dighinala; Dighinala, Khagrachhari, Chittagong	GGXTAGTGTXAACGTGXGTCAGTGACGCCTTGTCATAACGATCTTAAGAAXAGXCAXGXCCTGACACCATCXCXCAGGCCATAAACAACACCGCTTCGXGT
555665	Suwalak BRAC Laboratory Office; Bandarban Sadar, Bandarban, Chittagong	NNXNANNATGNNTXCGCAXAAXXAACGNTCNACCNXAXCGNTTATATGCXXANXNGXAXANTGNCANTGTAXCXXGACTCNGAAATAACANCACNNTANNT
555667	Matiranga Upazila Health Complex; Matiranga, Khagrachhari, Chittagong	GGTCAATGCXGACGCGTGTCATGGXTACTTXGXXATGAXXXTXXCAAGCAGAGGCGGAXCTTGATGATGTCCCXCXGCXTCGXXCCXXXXTXXXTXXXXXC
555669	Suwalak BRAC Laboratory Office; Bandarban Sadar, Bandarban, Chittagong	GGXTAGCATGAGTXCGXAXCAGGAACGCTCAACCAXAXCGCTXATGTGCAXAAXTGGAXATTGACACCGTAXCXXGACTCAXAAATAACACCACTATAXAT
555671	BRAC (BHP) -Laxmichari; Lakshmichhari, Khagrachhari, Chittagong	AAXCAGTXTXGGCCCGCAXATXXGGTGGCTAACTTXAXTGATTXTGAACXXAAXCGXAXATXGACAACXTXXCXXGGGTTATAAACATCACCATTACAXAT
555672	BRAC (BHP) -Dighinala; Dighinala, Khagrachhari, Chittagong	GATTAGTGTGAACCTGTAAAXGTXXXGCTTAGXXACGAXCXXXXTGTACAAAGGTAGAXACAGACACTATCCCXCXGCCTXXXXXXXAXXXXXXTXXXXXT
555673	BRAC (BHP) -Rajasthali; Rajasthali, Rangamati, Chittagong	GGTXANTATXNGTNTNTNAXAGNNGTNGCNNGTNNTGTCXCATTTNANAAGNNANAGACACTGNCACCNNCNGCCNNNTNNXANCTNXNCNNNNTTNNGNT
555675	BRAC (BHP) -Dighinala; Dighinala, Khagrachhari, Chittagong	GGNNAGNANXNACNNGCGXAXGTXXNXCXTXAXTATNACXAAXXCGNNCGNANATXXXXANNXNCNCNNXNXGXNGAXXXAGCAXCGTXATTXXTATXNXT
555676	Naikhongchhari, Ghumdum BRAC office; Naikhongchhari, Bandarban, Chittagong	GNTCAGCGTXGGTGTCCAANATTNGCGGNNTACCTCNTCCAATXCAANCGAAGANNGAXACTAACNNCGTCAGXNGGGCTAXAAACAACCCCACAACAAAT
555679	Naikhongchhari, Ghumdum BRAC office; Naikhongchhari, Bandarban, Chittagong	AGGTAGTACXGACCCGTAAAATGGATGGCTAACCTTGACCCATXCATXCGGAGACGGAXACTAATGACATAAGCCAAGTCCTAAATGACATCATTATAAAT
555680	Suwalak BRAC Laboratory Office (2); Bandarban Sadar, Bandarban, Chittagong	AGTXNANGNXAANGTGTATXAXTAGCGNTCAANCANNATXCTTTNGNGAGGAGATANGXATAAAXACNATAANXCAGCNNAXAGACAXCANCGCTXTNANT
555683	BRAC (BHP) -Rajasthali; Rajasthali, Rangamati, Chittagong	AGGXAGTATXAATGCGTAAXTTGAGCAGTCTGTTATATCXAATTTGTAAGAAAGTATAGATTAGCACTGTCCCCCGGGCCCXAAATAXTACTGCTTCGGAT
555685	BRAC (BHP) -Dighinala; Dighinala, Khagrachhari, Chittagong	GGGCAGTATXGATGTGTATATGTGACGCXXXACCACGTCXXAXXTAAAAAAAAACGGGXACAAATGCTGXCACXAXAXXTCXXXXCGAXXTXXXTXTXAXT
555687	BRAC (BHP) -Laxmichari; Lakshmichhari, Khagrachhari, Chittagong	AGXCAATXTXAATGXCTGXAAXGAGXGCTTAGTCAXAXTCCACXTAAXXXXAGXCGTAXXCXGAXXAXXTXXCXXAGCTTCTAGATAACCTCGCTACAXAT
555689	BRAC (BHP) -Dighinala; Dighinala, Khagrachhari, Chittagong	GGXCGGCATXAACCCGTATAAGTAATXGCTTGCCTCATCGCTXTCGAAAGXAAXCGGGXCCTGATAATGTCXCXAGGXTCCGAAATAACACCACTACAXGT
555694	BRAC (BHP) -Laxmichari; Lakshmichhari, Khagrachhari, Chittagong	AGXCAAXXCXGATXCGXXXXAXGGGTXCNTTACNTXAXTGATTACATACGXAAXCNTGXACXGAXGCTGTCXCXAGAGTCCXAACTATCCTCACTACGXGT
555695	Suwalak BRAC Laboratory Office (2); Bandarban Sadar, Bandarban, Chittagong	GATXAATATXGATCCGCATXAGGAACGCTTAACCATATTXCTTATATGCAAAAATGGGXATTXACACTGTACCXAGACTCAXAGATAXCACCACTXTAGAT
555696	Matiranga Upazila Health Complex; Matiranga, Khagrachhari, Chittagong	AGTTAGTACXAACGTGTATAXGGXXCGXXTXGXTTTATCCXXXATXTACXAAXGTGTAXACTAACGACGTCXCTCXAXXCCXXXXXAXXXTTXXTXXXGXX
555699	BRAC (BHP) -Dighinala; Dighinala, Khagrachhari, Chittagong	AGTTGATGCXAACCCGCGTAXGTXXCGXXXAGCTATAACCXACXCXTGCGAAAATAGXXCTTAACACTGTACCXAXAXCTXXXXXCAAXCTXXXTAXXGXT
555703	BRAC (BHP) -Dighinala; Dighinala, Khagrachhari, Chittagong	GGGCGGCATXAACGCGCATCAGGAATACTTXACCTTAACCXAXXXATAAAAGGGTAGAXACAGACACCGACCGXAGGXXTXGXXXTGXTCTXXXTACXGXT
555704	Matiranga Upazila Health Complex; Matiranga, Khagrachhari, Chittagong	GGGCAACGTXAGCGCGCATCAGTXXTACXXAGXXACAACCATXXCGAGAAGAGGTGGGXACTAACGATATAACXCXGXXCXGXXXTGTXXTXAXTXXXGXT
555707	BRAC (BHP) -Panchhari; Panchhari, Khagrachhari, Chittagong	AAXCGGXXCXGATGCGTAXXXXXXXXXXXXXXXXXXXXXXXXXTTATGAAXAGXCATAXACXGGCACTATCAGXXAACTTCXAAATATTATTGCTACGXGT
555709	Suwalak BRAC Laboratory Office; Bandarban Sadar, Bandarban, Chittagong	AGGTAATATXAGTCCGCATCAGTGACGCTCTACCATAACGCTTATATGCAAAAACGGAXACTGACACTATACCXAGACTCATAGATAACCTCACTTTAGAT
555710	Suwalak BRAC Laboratory Office (2); Bandarban Sadar, Bandarban, Chittagong	GGGXNATNTXGACCNNTATXAGGAGCGCTTAGTCNTAANXCATNTANNCANANNCANGXANTGGCAANGTNCCXAGANTNNXANANNXCXCNGCNXNAXNN
555711	Baghaichari Upazila Health Complex; Baghai Chhari, Rangamati, Chittagong	GGTXAATXTXAACCTGTAAXTTXAGXXCXCTAXTXXXXXXCATTTATAXXAXGXTXGAXAXXXGXACCXXAXGXAGGXXCXXAXCTGXCACTGTXTCXXAX
555712	Suwalak BRAC Laboratory Office; Bandarban Sadar, Bandarban, Chittagong	AGXTAATATGGGTXCGCAXAAXXANTGGCCAGTCAXGXCCAATTCATGCXXAAXTAXAXACXGGCXCCGTAXCXXGGGTTCGAAACAACCCCGCTATGGGT
555714	BRAC (BHP) -Laxmichari; Lakshmichhari, Khagrachhari, Chittagong	GGXCGGCGTGAACGCGTAXAAGTGGCXGCCTGTTATAXTGCTCXCATACAXAGXTATAXATXGAXGACGTAXCXCGACTCAXAGCCGATATTGTTTCAXAT
555716	BRAC (BHP)-Naikhongchhari; Naikhongchhari, Bandarban, Chittagong	GGGXGGCNTXANTGNCTAAXAXTGNCANCTTATCTTGACXCNNTTAAGCAAAGACGGGXATTAANAATNNCANCCNNCTTCXAAACGXTCCTATAXCAGNT
555717	BRAC (BHP) Panchhari (2); Panchhari, Khagrachhari, Chittagong	GGGCGATACGAATCTGCGTAXGTGXCXCXXXXCTATAACXXXXXTATAAGGAXATATAXACTGGTACCGTACGXCGGGXTCTXGXCGXXXXXAXTATGAXT
555718	BRAC (BHP) -Laxmichari; Lakshmichhari, Khagrachhari, Chittagong	GGXCGATXTXAGCGCGTGTATTXAGTACTTAGCCTXGATGATXTTATAAAXGGXTGGAXACXGGCACXATAXCXXGGGCTCTAACTAXCCCCGCTATAXGT
555719	BRAC (BHP) -Ramgarh; Ramgarh, Khagrachhari, Chittagong	AGXTGACATXGGCNCGTAACAXGGGTNNCTAATNTCAXCNCATATAAGCXXAGXCGXNXACXANCACTATCXCXXGGGCTCGCNACGACANCNTTACGXGT
555721	BRAC (BHP) -Dighinala; Dighinala, Khagrachhari, Chittagong	GGTCGGCATGGACGCGTGAAAGXGGTACXCAGXCTCAACXATXXCATGCAGAGACGGGXACTAATAACATACGXAGACXTXXXXXCATTXXXXXAACXGXT
555722	Belaichari Upazila Health Complex; Belaichhari, Rangamati, Chittagong	GGTXGACACXGATCCGTATXATGGGCAXCCAGCXTTATCXCATTTAAACGGGGGCGGAGACAAGCGCTGTACCXAAGGCTAXAGATAXTCTCACTTCAAGT
555723	BRAC (BHP) -Jurai Chhari; Jurai Chhari, Rangamati, Chittagong	AGGXAGTGCXGACCTCCATXAGTGGCGCCCAGCCACGACXAATTCAAAAAAAAGCGGGGACAAACGCTGTCCCCCAAGTTAXAGACGXTACTGCTTCAGGC
555726	BRAC (BHP) -Ramgarh; Ramgarh, Khagrachhari, Chittagong	XAXCAGXXTXAXXCXXTAXXXXXGXXAGCCTXTNAXAXCCXXXXTXXXXXXXAXXAXGXXTXAXXXCXXXXXCXXGXGTXXGAACXXXTACTACTXXXXGX
555727	BRAC (BHP) -Panchhari; Panchhari, Khagrachhari, Chittagong	XAXTAGXXTXXXXCXGTXXXXXXAGXXXTXNXTCXXAXTXCXTTTXTAXXXXXXTAXAXAXXGAXXCXATXXXXXGXCCXAGAAATAATACCGCXXCGXXC
555728	BRAC (BHP) Panchhari (2); Panchhari, Khagrachhari, Chittagong	AGTCGATATGGATCCGCATCATTGXCAXXXXACXATATXXAAXXTXAAAAAGGGCAGGXACTAATACCATACCXAXGXXTCXXXCXXTXXTXAXTXTXGXT
555731	BRAC (BHP) -Ramgarh; Ramgarh, Khagrachhari, Chittagong	GAXCGGXXTXGACXCGXAXXTXXAGTXCCTAGCCXXGXCGCTXXTAAGCGXAGXTAGGXACXAGTACXGTAXGXCGGCTTAXAGATAACACTGTTACGGGT
555738	BRAC (BHP) -Ramgarh; Ramgarh, Khagrachhari, Chittagong	GGXCAGTATXGGTGTGTAAAAGXGGCGGTCTGTTACGTTGCTTTCATACGXGGXTAGAXACTAACACTGTAXGXAGGCTCAXAAATGXCATCATTATGXGT
555741	BRAC (BHP) -Ramgarh; Ramgarh, Khagrachhari, Chittagong	GGXTAXCXXXAGTGCGXXTCTXXAGCACCCTATCAXAATGCATXXXXXXXXXXXXXXXXXXXXXXXXXXXXXXXXAXCTTCGAAATAATATTATTACAXGT
555743	BRAC (BHP) -Ramgarh; Ramgarh, Khagrachhari, Chittagong	GGXTAGCXTXGGCNCCXAANTXXGGXGCCTNGTNNXAXTCCACTTAAXXXXAGXNGXAXXTXGACXCTXAXXGXXGACTCAGAAACAACACCACTATGGNN
555744	BRAC (BHP) -Belai Chhari; Belaichhari, Rangamati, Chittagong	XATXAATXCXAXTNXCXAAXXTXGXXACCXXAXNTXXAXXCXTXCGTGXGXAAXTXXAXXNXNGXXXTXTXXXXXXXXXTXXXAXTXXXXXCGXXTTGGXT
555746	BRAC (BHP)-Thanchi; Thanchi, Bandarban, Chittagong	AGXCGACGTGAGCGTGTAXAAXTGATGGCCTACTATGXTGCTTXXXXXXXXXXXXXXXXXXXXXXXXXXXXXXXXAACTTCXCAACAATXTCGTTACAAGT
555749	BRAC (BHP) -Rajasthali; Rajasthali, Rangamati, Chittagong	GGTXAATATXAGTCTCTAAXAGGGGTAGCCAGTCATGTCXCATXTGAGAAGAGATAGACACTGACACCGTCAGXCGGCTTCXAGCTGXCCTTATTTCAGAT
555753	BRAC (BHP) -Ramgarh; Ramgarh, Khagrachhari, Chittagong	AAXCAGCXCXAGCGCGXXTXAGXGGXGGCTTATCTXATTGCTTXTATGXAXAGXTGXGXACXAGTXCTGACXGXCGGCTTAGAAACAXTATCGCAACGXGT
555757	BRAC (BHP) -Panchhari; Panchhari, Khagrachhari, Chittagong	GGXCGNTGTXNGNGCGTAXXXXXXXXXXXXXXXXXXXXXXXXXACANNAAXAAXCGGGXACTAGCACCGACXCXXGAGTTAGNNACGACACNACTTCNAGC
555759	BRAC (BHP) -Panchhari; Panchhari, Khagrachhari, Chittagong	XGXCAAXXTXXGCXXGXXXXAXXAGTGCTCTGTCTXAXCGATCTCAAAXXXAGXCAXGXACXAATGATGACXGXXGGCCTCGAAATAANATTGCATCAAGT
555760	BRAC (BHP) -Panchhari; Panchhari, Khagrachhari, Chittagong	AGTCGGTGTXXACXCCTGAAATGGATGCXXAGXCTCGTCCXXXXXXAGXXXAGGCXXXXXCTXGCXCTGXCXGXAGGCXTCTXAXCGAXXTXXXTXCXAXC
555761	BRAC (BHP) Matiranga (1); Matiranga, Khagrachhari, Chittagong	NGGXNACATXANNNCGTNNXAGGNNTNNCNNGTNATNANXCNTTNANNAGGAGATANGGANTGACGACGTCACNNAAGCNCXNACNAXTACTNNTTNAGGT
555762	BRAC (BHP) -Panchhari; Panchhari, Khagrachhari, Chittagong	AAGCGATACXGACCCGTAXAAGTGGCACCCTGTCTXAXTGCTTXTATACGXGGXCGXGXACTGACXCCGAAXGXXGACTCCGAAATAACACCACTATAGAT
555764	BRAC (BHP) -Barkal; Barkal, Rangamati, Chittagong	GAGXGGTGCXAGCGTCCATXATTGATGGCCTGTCACAATXATTTCGTGAGAAGACGGGXATAGACACTATAACXAGAGTCCXAAATAXCACCACTTCAGAT
555765	BRAC (BHP) -Jurai Chhari; Jurai Chhari, Rangamati, Chittagong	NGTXNNNGCXAANNCNTGTXNTNGGTNNCTTGNCNCNACXCNTTNNTNNAAAGNNAGAGNNNGNNNCCGACACCANNNTNAXAAATAXNACNACTTNGGGT
555766	BRAC (BHP) -Rajasthali; Rajasthali, Rangamati, Chittagong	NGGXNATANXGNNNNGTGTXAXTAGTAGCNTNCNNCNANXNATTTANGCANAGNNGNNCNCTNNCNNTNTNANXANGGNNAXAANTNXNANCNCTTCNGNT
555769	BRAC (BHP) -Dighinala; Dighinala, Khagrachhari, Chittagong	AAGXAATGCXAGCGCGTGAXATTAGTGCCTTGTCTCAACXAATXTGTGAAGAGACGGAXACTAGCGCCATCACXAAAGTCAXAAATAXCCCTGTTTTAXGT
555771	Belaichari Upazila Health Complex; Belaichhari, Rangamati, Chittagong	GGGXGGNGNXNATGTCCAAXXTXAGTGGCCTGTCTTGANXCACTTAAACGAGGXXGGAXXCXAAXACTANNACXAAGGTCNXNAACXXTACCGCTTXAANT
555773	Alikadam, Chokhyong Union, AKOTA office; Alikadam, Bandarban, Chittagong	GNXCGNTGNXNACGTNTNXAAGXNGTGNCTAACNAXAXNNCATTTNTGAXXAGXNNGGXNNXNNCXCTANCXCXXXXXTXCGXAAXAXXXNXXCTXCGXGC
555774	BRAC (BHP)-Thanchi; Thanchi, Bandarban, Chittagong	AAXCAAXGTGGACXCGTGTCATTAGCGGCCTGCCTTAXTGATTXXXXXXXXXXXXXXXXXXXXXXXXXXXXXXXXAGGTTAXAAATGACACCGCTACGGGT
555777	BRAC (BHP) -Dighinala; Dighinala, Khagrachhari, Chittagong	AGGXGGTACXAACGTGCGAXTGTAACGGCCAACCTCGTCXCTTXCATAAAAGGATATXXACTAACGCCGTCACXAGACTTAXAAACAXCATCGCTTCGXAT
555779	Belaichari Upazila Health Complex; Belaichhari, Rangamati, Chittagong	GGGXAXCXTXGANCCGCGAXATTGGCGCCNNGNCATAATXCTTXTGTAAAXAGXTNGAXXXXGACGCCGTAACXXAAGTXCXAXATXXCACCACTTCGAGT
555782	Chittagong Medical College Hospital; Panchlaish, Chittagong, Chittagong	AGGCAGCACXGACCCGCAXAXGTXXCGXXTAAXTTTGACXAXXXTATGAAAGGACAGAXCCTGGCACCATAAGXAAGCXTCTAGXTAACXTTGCTACGXAT
555783	BRAC (BHP) -Barkal; Barkal, Rangamati, Chittagong	AATXAGTGTXGACXCGTATXATGGGCGGCTXXCCACATTXAATXCATACGGAGGCGGGXACTGATAATGTCACXCAGCCCAXAGACGXTATTACTTTGGGC
555784	BRAC (BHP)-Thanchi; Thanchi, Bandarban, Chittagong	GAGTGACGTXNACCCGNANATTTAGTAGNTNATCTTANCNCATXCAAGAAGAGANGTAXACTAATAATAANCCXNGNGTTATANACAACATCGCTATAAGT
555786	BRAC (BHP) Matiranga (1); Matiranga, Khagrachhari, Chittagong	XAXTAAXXXXXANXXNXAXXTTXGGXXGNTXXXCXXAXTXXXXXXATXXXXXGXXXXAXXTXGXTXAXXTXXCXXAXGCXXGAXAXXAXAXXXTXTTXXGT
555789	BRAC (BHP) Matiranga (1); Matiranga, Khagrachhari, Chittagong	AAXCAAXATXGGTGCGTGXXXXXXXXXXXXXXXXXXXXXXXXXXTATAAAXGGXTAGGXACXAACGCCATCXCXXAGGTCAGAAATATTACCATTACGXAT
555791	BRAC (BHP) Matiranga (1); Matiranga, Khagrachhari, Chittagong	GGXCGATGTXGGCCTGTATAATGGGCGCTTAGCCTXATCGCTTTCATGAAXAGXCGXGXACXAACGATATAXGXXGGGCTCGAAATAACACCGCAACAXGC
555793	BRAC (BHP) Matiranga (1); Matiranga, Khagrachhari, Chittagong	AGXCNNCATXNNTNCGTATANGNNGNNNNTNNNCTTAANNANNTTNANNGXGGXCNNAXACTANXNCCANNXCXXNNNCTAGNAANANTANNACNANNGNT
555795	BRAC (BHP) Matiranga (1); Matiranga, Khagrachhari, Chittagong	AGXCAGTGTXAGTGTGCGAAATTAGTGCTTTGCCATAACCAACTCAAAAAXAGXCGGAXACAGACGCCATCACTCGGCTCCGAGATGXCATCGCTATAXGT
555797	BRAC (BHP) Matiranga (1); Matiranga, Khagrachhari, Chittagong	AGXCAGTGTXAGTGTGXGXAAXXAXXGCTTTGCCAXAXCCXACXXXXXXXXXXXXXXXXXXXXXXXXXXXXXXXXGGCTCCTAGATGACATCXCTATAGGT
555798	BRAC (BHP)-Thanchi; Thanchi, Bandarban, Chittagong	AATCAGCACGAGCXCGCAXAAGGAGTGGCCAGTTTCAACGCATXXXXXXXXXXXXXXXXXXXXXXXXXXXXXXXXGGGTTAXAAACGXCATCACTTTAAAT
555799	BRAC (BHP) -Dighinala; Dighinala, Khagrachhari, Chittagong	GNGTANTGTXNNCCCGTATCANTXXCACTTAACTATNNCCXACXCGNGAGAAGANXGXXATTGACGNTATNAGXCGAXXCCGXAXCGAXXXXAXTATXAXT
555802	BRAC (BHP) Matiranga (1); Matiranga, Khagrachhari, Chittagong	GGGTAATATXGACCTGTAXAAXGAACGCCCTATCTXGXCGXAXXTATGAAXAAXCGTGXACXAACACXGACXGXXXXXXXXXXXXXXXXXXXXXXXXXXXX
555803	BRAC (BHP) Matiranga (1); Matiranga, Khagrachhari, Chittagong	XXXXXXXXXXXXXXXXXXXXAXXAGXXCTTTGTCTXAXTGCAXXCATAXAXAGXCAGAXXCXGGCAXTGAXXCXXGAGCCAGCAACGATATCACAACAGAT
555806	BRAC (BHP) -Belai Chhari; Belaichhari, Rangamati, Chittagong	AGNXNGTNCXAGTGTGCGAXAGTGATGGCNTNNCTTXNCXATTXCGTACAGAGGCNGGXANTAGXAATATAXCXCNGCCCAXANACAXCATCGCTTTAXGN
555807	BRAC (BHP) -Barkal; Barkal, Rangamati, Chittagong	NNGXGATNNXNATNNNTNAXAXGNGNAGNTANTCNTNTCXNTTTNGNNANGNNNCNGNXANTGNTANNANACNTNGNCNNNXANNCNXCANCNCTTNNGNT
555808	BRAC (BHP) -Dighinala; Dighinala, Khagrachhari, Chittagong	GGGTAGTGTGGATCTGCAXCAGXGXTACXTXAXCTCGACXATXXCXAGAAAAGACXGXXACTGGCGCCATACCXCXAXXCXGXXXXXXTXTXAXTXXXAXT
555811	BRAC (BHP) -Dighinala; Dighinala, Khagrachhari, Chittagong	GGGTAGTGTXGGTGTGTAXCAGTGXCACXTXGCTATGTCCAXXXTAAAAGGAAGTAGGXCCTXATGCTGTCCCXCXGCXTXXXXXCGXTCXTXXTAXXXXT
555813	BRAC (BHP) Matiranga (1); Matiranga, Khagrachhari, Chittagong	AGTXAGTGTXGATCCCCGTXTTTAATACTCAGTCATAATXCATTTGAGAAAAAATAGACACTGACGCTGTCACCAGGGCTCXAGATGXTCCCACTTCAAGT
555818	Naikhongchhari, Ghumdum BRAC office; Naikhongchhari, Bandarban, Chittagong	XAXXAACXTGGACXXGTXXXAXXGGXXGXXAGTCXXXXCGXXXXCXAXXXXAAXCGXAXXCXAGTXCXGXXXGXXGXCTCXXXAACAXCXTXXXXAXAAGT
555819	BRAC (BHP) -Dighinala; Dighinala, Khagrachhari, Chittagong	GNGCGNCANXGANGCCTAANATTGXTGCXXAGCTANAACCXAXXTANGNAAGGNTAGAXATTGACACTNTCCCXNXAXXTCTXXXCGTTCTXXXTATXAAT
555820	BRAC (BHP) -Dighinala; Dighinala, Khagrachhari, Chittagong	GATTGACACXAATCTCTATATTTXXTXCTXAGCTATATCXXTXXCXTACAGAAGCXGXXXCAGGTACCGXCCCXAAAXXCXTXGXCATTXTXAXTACAXGT
555821	Kubbang Brac Office; Barkal, Rangamati, Chittagong	AGGXAATGCXGATGTGTATXAGTGGCAGCTAACTATATTXATTXTATACGGAAATGGAXACTGGXAATATCCGXAGGCTTCXAAACGXCACCGCTTTAXGT
555822	BRAC (BHP) Matiranga (1); Matiranga, Khagrachhari, Chittagong	XAXCANCXTXGGCXNGNAXXAXTGGXGGTTAGNCNXXXCCCANXXATXCXXAGXCGXGXCTXAAXXCXATXXCXXGXCTTCGANACAATANCATTACAXGT
555823	BRAC (BHP) -Dighinala; Dighinala, Khagrachhari, Chittagong	GNNXGGTGTXNACNCGNNTXATGGGTANCNTNCCNCNTNXNACTTATNAGNAGNTANNGANNGNCGNTATCACCCNANTNAXAAATNXTNNCNCTTNNXNT
555824	BRAC (BHP) -Dighinala; Dighinala, Khagrachhari, Chittagong	GATXAATATXGATGTGCGTXTTTAGTGCCTAATCATAACXCATTTGAAAAAGAGCAGGXATAGACGCCGTCCCXCAAGTCAXAAACAXCATCACTTCGGAT
555827	BRAC (BHP)-Thanchi; Thanchi, Bandarban, Chittagong	AGTCGATGTXAGCGCGCGTCAGTAGTGGCCTATTTTGACGAATXTGAAAGGAGACATGXACAGACGCCGACACXAGACTCATAGACGATCCCGCTATAGAT
555829	BRAC (BHP) Matiranga (1); Matiranga, Khagrachhari, Chittagong	ANXCAACXTXGGCCTGTAXAAXGAGTGCCNTACCTXAXTNCATXTATACAXAGXTGTAXXCXAACACTGAXXCXXGGGTCAGAAATAANATCATTACGXGT
555830	Naikhongchhari, Ghumdum BRAC office; Naikhongchhari, Bandarban, Chittagong	GAGTAATACGAACXCGTAXATXXAGCXGTNAACCAXAXTGCATTCAAXCAXAGXTGXGXACXGGCAAXGACXGXXGACCTCGAAATAACACTACTATAAGT
555839	Naikhongchhari, Ghumdum BRAC office; Naikhongchhari, Bandarban, Chittagong	AAGTGATATGAATXTGTAXCAXXAGCGCCTTGCCAXAXCCCATTTAAACXXAGXCGXAXACXGGCXAXGTCXCXXGGCTTAXAGATATCATCGCTACAAGT
555841	Naikhongchhari, Ghumdum BRAC office; Naikhongchhari, Bandarban, Chittagong	GGXCGGCACGGATGTGTAXXAGGGGTXGTTAGCCACAXTCATTXTGTACXXAGXTGGGXATXAACXATGAAXGXXGGCTCCXAAACAACCCTACTATAAGT
555844	Naikhongchhari, Ghumdum BRAC office; Naikhongchhari, Bandarban, Chittagong	GGTTAATGTGGACGTCCGXAAXXAGCACCTAGCCTXAXCCAATTCAAGAAXAGXTGGAXACXGGCAAXATCXGXXGGGCCAGAAACAXCACCGCTACAGAT
555845	BRAC (BHP) -Belai Chhari; Belaichhari, Rangamati, Chittagong	AATXGATATXGACCTCTAAXAGTAGTGGCCTACCACGTTXCATXTGAACGGAAGTGGAXACTGACAATGTACCTAAAGTTAXAACTGXCACTGTTTCAXGT
555846	Naikhongchhari, Ghumdum BRAC office; Naikhongchhari, Bandarban, Chittagong	GGXTAACATGAATXCCTAXATXXGGCXGCTAGCTTXGXCGCTTTTATACAXAGXCGXGXXCXGGCAATGTAXCXXXXXXXXXXXXXXXXXXXXXXXXXXXX
555850	Naikhongchhari, Ghumdum BRAC office; Naikhongchhari, Bandarban, Chittagong	GAXTAACANGNACXTGTAXAATXGGCXGNNAGTCACGXNGNNTTCAAAAAXAGXCGXGXCCXAGTXCTGACXGXXNNCTCCGAAACAACCNTNCTATAAGT
555853	Naikhongchhari, Ghumdum BRAC office; Naikhongchhari, Bandarban, Chittagong	AGXCGGCGTGGATXCGTGXCAXGAGCGCTTTGTCAXGACCCTTXTATACGXAAXTGXGXCCXGATXAXXTCXCXXAAGTTAXAAATAACXTTATTACAAGT
555854	BRAC (BHP) -Jurai Chhari; Jurai Chhari, Rangamati, Chittagong	AGGXAACGTXAACGCGCGTXAGTGGTGCCCTGTCATAACXAATTCATGAAAAGGCAGGGACTAACACCGTCCCXCAACCCCXAGACAXCACTACTTTGAGT
555859	Khagrachhari Sadar Cantonment; Khagrachhari Sadar, Khagrachhari, Chittagong	GNTXAGNGTXGNTCNGTATXNGTNGNGCTTNNNCNCGANXNNNXNATGNGNAGATNNAXACTANTNATGNCXCXANGNTNAXAGANNXTNNCGNTTCAXNN
555865	Khagrachhari Sadar Cantonment; Khagrachhari Sadar, Khagrachhari, Chittagong	NNTXAGNNTXGNTCNGTATXNGTNGNGCTTNNNCNNGANXNNNXNATGNGNAGATNNAXACTANXNATGNCXCXXNNNTNAXAGANNXTNNCGNTTCAXNN
555867	BRAC (BHP) -Belai Chhari; Belaichhari, Rangamati, Chittagong	AGTXAGTATXGGCGTGTGTXATTAACGCCCTACCTCGACXATTXCAAGCGGAAACGGAXACTAGTACCATCCCXCGAGCTAXAAACGXCACTACTTCGXAT
555869	BRAC (BHP) -Dighinala; Dighinala, Khagrachhari, Chittagong	AATTAATATXGACCTGTATAXGXAGTGCXXTGXCACXAXCXATXTAAACAGGGACAGAXACTAACGCCAACACXCXAXXTXGXXXTGXTXTXAXTXTXGXT
555871	BRAC (BHP) -Laxmichari; Lakshmichhari, Khagrachhari, Chittagong	AAGXGGTGTXAACCTGTAAXAGTAGTGCCCTGTTATAACXCATTCAAAAGGAAACATGXACTGACACCGTCCCXCAGGTCCXAAACAXCACCGCTTCGXAT
555877	Bandarban Civil Surgeon Office; Bandarban Sadar, Bandarban, Chittagong	AGXCAGTGCGAACXCGTNTCAXGGGTGGTNTNCNTXAACGATCXCATGXXXGGXTGXGXXTXAGXXCCXTXXCXXXXXXXXXXXXXXXXXXXXXXXXXXXX
555883	Farua Brac Office; Belaichhari, Rangamati, Chittagong	NNNXNNTGTXNGNNCGTNTXTTGNNCNNCCTNCCNTNTNXNATXNNNGAAAGANCNNGXANAAGXNCCGTNCCXCGANTCAXAAATAXNNNCGNTTTNXGN
555884	BRAC (BHP) -Laxmichari; Lakshmichhari, Khagrachhari, Chittagong	GATXAGTATXAGTGCGCGTXTGGAATGCCTTGTCTCAACXCTTTTAXAAGAAGGCAGAXACTGGCAATAAACCXCGGGCCAXAACCGXCACCACTTCAGGT
555885	Farua Brac Office; Belaichhari, Rangamati, Chittagong	AGGXAATGTXGGCGTGTGTXATTGGTAGCCAACTACAACXCATTTATGAAGAGATGGAGATTGGCGCTGTACCTCGAGCTAXAAACAXCCCCACTTCAAGT
555892	Ramu Upazila Health Complex (1); Ramu, Cox's Bazar, Chittagong	AGGTAATATXGATCTGCGACTGTGGCGCTTAGTCXTAACCCTTXCAAAAGAGGATAGGXACTGGCGACATACCXXXAGTTCTAAACATXCTTACAACAAGC
555897	Farua Brac Office; Belaichhari, Rangamati, Chittagong	GNGXNGNGTXGANCNGTNXXXXXXXXXXNXXXXCXXXXXXXXXXCATAAXNGGANANGXCCTGACNCTGTAACXAGAGTTNXANACGXCANNGCTTTNGNT
555898	Bandarban Civil Surgeon Office; Bandarban Sadar, Bandarban, Chittagong	GGXCGACGTXGACCCGXGXCAGXAGCXXCTAACTTXAACCCAXXCGTAXXXAGXTATAXACXGACXXTXACXCXXGGCTCCGAGACGXCACCACTACGXGT
555899	BRAC (BHP)-Naikhongchhari; Naikhongchhari, Bandarban, Chittagong	AGGCAGCXTXGGCGCGTATATGGAXCAGTTTGTCTTAATGCATTCGAAAAXAGXCGGGXACTGGTACCXTAXCXAGGCTTCTAAACGACATTGCAACGGAT
555900	Bandarban Civil Surgeon Office; Bandarban Sadar, Bandarban, Chittagong	GATCGGTGTXGACCCGTGXXTGXAACXCCTXGTCTXAXCGCAXXCATACAXGAXTAGGXATTAACGCCGACXCXXGAGCTAGAAATAATACCGCTTTGXAT
555904	BRAC (BHP) -Laxmichari; Lakshmichhari, Khagrachhari, Chittagong	AAGXGGTGTXAACCTGTAAXAGTAGTGCCCTGTTATAACXCATTCAAAAGGXAACATGXACTGACACCGTCCCTCAGGTCCXAAACAXCACCGCTTCGXAT
555905	Dulyatali BRAC Office; Lakshmichhari, Khagrachhari, Chittagong	GATXAGTATXAGTGCGCGTXTXGAATGCCTTGTCTCAACXCTTXTATAAGAAGGCAGAXACTGGCAATAAACCXCGGGCCAXAACCGXCACCACTTCAGGT
555906	Farua Brac Office; Belaichhari, Rangamati, Chittagong	GGGXGGTATXGGTGCGTATXAGTGGCACCTAGTCATGTCXXTTTCGAXAAGAGGCGGGGCTTAACACTGAAACCAAAGTTAXAGACAXTATCATTTTGAGT
555908	Lama, Soroi Union, AKOTA Office; Lama, Bandarban, Chittagong	AAXCAGTXCXGATGCGTAACTGTGGCGGCTAGCCTTAACGCATTTGTGAGXAGXTGGGXATTAACAATGTCXCXXAGGCTCGAAACAATCCCGCTATAXGT
555911	BRAC (BHP)-Naikhongchhari; Naikhongchhari, Bandarban, Chittagong	AGXTGAXATGGACGCGTGTCAGXGGTGCCCAGTCTTGXCGAACTTATGCAXAGXTGGAXATTGGTGCTGTCXCXAGGGTTCXCAACAXCACCACTTCAAAT
555912	Lama, Soroi Union, AKOTA Office; Lama, Bandarban, Chittagong	GGXCGGTXTXAACXCGTGXAAXXAGTXXCTTAXCAXAXTCCAXXTATGXAXAGXTAGGXXCXAATGATXTXXGXXGGGCCAGAAATAXCATTGCTACAGGT
555913	Ramu Upazila Health Complex (1); Ramu, Cox's Bazar, Chittagong	GGGCGNTGTXAANCNNTNXNATGGXTACTTXAXTNCNNCCXTXXXXTACAAAGATAXXXXTAXNTGCNNTCXCXAAGGCCCTXAXTGAXATXAXTATGNGN
555914	BRAC (BHP)-Naikhongchhari; Naikhongchhari, Bandarban, Chittagong	GAXCGGXXCXGATXTGXXXAAXXGACXCCTTGTTAXGXCGCTXTTGAAAXXAGXTATAXATXGGXXCTGACXGXXGGCCTCGAAACATCACTACTATGXAT
555919	Bandarban Civil Surgeon Office; Bandarban Sadar, Bandarban, Chittagong	XAXNGNXXTGNANXXGXAXXAXXANTGGTCTXNCAXAXNGNXCXTATXXXXAAXCGXAXXCXANCXCTXTXXCXXNANCCCXANATANCNTCACTNTNANN
555921	BRAC (BHP) -Dighinala; Dighinala, Khagrachhari, Chittagong	GAGCAATGCXGATCTCTAACXGTAXCAXXTAACTTTGACCXTXXXXTGCXAAGACXXXXXCTXGCGCCAXXXXXCXGCXTCGXXXTGAXCXXXXTATGGXT
555925	Naikhongchhari, Ghumdum BRAC office; Naikhongchhari, Bandarban, Chittagong	XGXTXATXCGXAXXXGXAAXXXXAXCGCCTAGTTAXXACCCTXXCXTXXXXAXXXGXAXXCXAXCXCXXXXXXXXGXXXCAGAAAXGXTXCCGXXAXGXGT
555932	Bandarban District Hospital; Bandarban Sadar, Bandarban, Chittagong	GGXCANTGTXAANCNGCNTNATTNGCXCCCTNTCATGTCGCNTTNGNGCAXAAXNNNGXACXNACGCNNAAXGXAGAGTCAGNGACNATCTCGCTACNXNT
555947	Naikhongchhari, Ghumdum BRAC office; Naikhongchhari, Bandarban, Chittagong	GGGCAATGCGXATGXGTAXXXXXXXXXXXXXXXXXXXXXXXXXTTGTGCAXAGXXGGGXATAGACACXATAXCXXGGCTTCGAGACXXCACTGCTACGAAT
555949	Naikhongchhari, Ghumdum BRAC office; Naikhongchhari, Bandarban, Chittagong	GGXCAACGNGNGCGTNTAXNAXGAGTGCCNNGCNNXAXNGNATTTAAACXXAGXTGGAXANXAGCGCNAACXCXXAGCTCCXAACNNATACCGCTACANNC
555952	Bandarban Cantonment (MDS); Bandarban Sadar, Bandarban, Chittagong	AATTGGTGTXGACCCGCATATGXAGCXCCTXGTCTCATTGAAXXTATAAGXGGXTGGAXATXGACGCTGACXCXXGGGTCATAAACATTCTTATTACAXAC
555953	Bandarban Civil Surgeon Office; Bandarban Sadar, Bandarban, Chittagong	GGXCGATXCXAACGTGCAXAXXTGGTGXCTXACCAXATTGXAXXTATAXGXAGXCGGGXCCXGGCGCTXTAXCXXAGCTCCGCAACATCCTCACTTTGXAT
555955	Bandarban Civil Surgeon Office; Bandarban Sadar, Bandarban, Chittagong	XXXCNXXXTXXACCXNXXXXAXXGGXXCTTXXCXAXAXCGCACXTATXXXXAAXXGXNXXCXNXXXCXXXXXXXXAXGTNCGNAATAATCTCGNTANNXAN
555956	Belaichari Upazila Health Complex; Belaichhari, Rangamati, Chittagong	GGGXGGXGXXAAXGTCCAAXAXTAGTGGCCTGTCTTXACXCATXTATACGAGGACGGAXACTAACACTAACACXCAGGTCXXCAACAXTACCGCTXCAAGT
555957	BRAC (BHP)-Naikhongchhari; Naikhongchhari, Bandarban, Chittagong	GAGCGGTGCXAATGTGTATAATTGACGGCTTGTCATGTCGCTTXTGTAAGAAGATGGGXATTAATACCAAACCXCGGCTTCTAAACATCATCGCTACGAGT
555958	BRAC (BHP) -Lama; Lama , Bandarban, Chittagong	AAXTAGXXCXGATCCGXGXXAGGGATXCCTAACCXXAACCCATTCATACXXGGXTGXAGACXGACXCTATCXCXXGACTCCGAACCATTCCCGCTATGXGT
555959	Bandarban Cantonment (MDS); Bandarban Sadar, Bandarban, Chittagong	AGXTAGXXTXGANXCCXXXCAXGGGTXGTCNNTNNXNXNGNAXTNNNGCAXAAXCGGAXATTAANGCNGNCAGXCGANTCNGNAACGACXNCNTTACAXAT
555960	Farua Brac Office; Belaichhari, Rangamati, Chittagong	AGTXGGCATXGGCCCGCATXTTTAGTGGTTTGTTTCGATXCTTTTATAAGGAGACAGAGCCAAGCGCCGAAAGCAGACTCAXAXATAXTACCATTTCAAGT
555962	BRAC (BHP)-Naikhongchhari; Naikhongchhari, Bandarban, Chittagong	GAXCAXXXTXAXCXXGTXXATXXAAXXGTCAGTTTXXXTGCTXXTAAAXXXAAXTAXGXACXGGTXCCGTXXCXXAXCTCCGCAATGACXCCGCTAXAXGT
555963	Farua Brac Office; Belaichhari, Rangamati, Chittagong	GGGXGGTATXGGTGCGTATXAGTGGCACCTAGTCATGTCXCTTTCGAAAAGAGGCGGGGCTTAACACTGAAACCAAAGTTAXAGACAXTATCATTTTGAGT
555967	BRAC (BHP) -Lama; Lama , Bandarban, Chittagong	GGTCAGTATXAACCCGTAACTGGAGCACCTTATCATAACGAATTCAAGAAXAGXCGXGXATAGGCGCXGTCXCXXAGGCTCXAGCTATCCTTACTACGXGT
555968	BRAC (BHP) -Lama; Lama , Bandarban, Chittagong	GGXCAGTXTXGATCXGCGXCAXTGGTAXTCTGCCTXAXTGAAXXTAAXXAXGGXCGXAXACXAACXCCATAXCXXGGCTTCXAAATAACCCCACTACAXAT
555971	Ramu Upazila Health Complex (1); Ramu, Cox's Bazar, Chittagong	GGGCAACATGGACCCCTAAAAGGGGCAXCCAATCATGTCXAACXTGAACAGGGACGGAXACTGGCGATGTACCXAXGCXTCXXXCXXTXXXXXXTXCXGXT
555972	BRAC (BHP) -Lama; Lama , Bandarban, Chittagong	GNXNNNXXTXGACXTGTATNNXXGACGXCNTNTTNTAXCNCATXCANANXXANXNGXGXACXAGCXANXTAXCXXGGNCTNGNNATAACANCNCTACNXGN
555973	Lama, Soroi Union, AKOTA Office; Lama, Bandarban, Chittagong	AAGCAGTACXXATGCGTAXCTGTGGCGXXTXGCCTTAXCGCAXTTGXGAGXAGATGGGGATTAACAATGTXCCCXAGGCTCGAAACAATCCCGCTATAXGT
555975	Bandarban Civil Surgeon Office; Bandarban Sadar, Bandarban, Chittagong	GGXCGGTGCXGACXCGCGTCAGGAGCXCCCAATCTTGTCCCATTCGTAXXXAAXTATGXACXAACACTATCXCXXGGCTCCGAAACAATACCACTACAXGT
555976	Farua Brac Office; Belaichhari, Rangamati, Chittagong	AGGXAACGTXGGTCCGTGTXTGTGGTGGCCAGTCTTAACXCATATAAGAGGAGACGGGXACAGACGCCGTAAGCAAAGCCCXAGACGXCCCCGCTTCGGGT
555978	Farua Brac Office; Belaichhari, Rangamati, Chittagong	GGTXGATGTXGATGCGTATXAGTAATACCTTGTTTTAATXAATACATGCGAAGGCGGAXACTGGXAATGTCACXCGGCTTAXCAACGXCATCGCTTTAAGT
555980	Bandarban District Hospital; Bandarban Sadar, Bandarban, Chittagong	AGXTAATACXGATXTCCGAAATTAATXXCCTGTCACATCCCAXXCATAXXXAAXTGGAXCCXAGTXXXGTCXCXXGACTCAXAGCTAXCACCACTTCAXGT
555986	BRAC (BHP)-Naikhongchhari; Naikhongchhari, Bandarban, Chittagong	GATXAATACXAACGTGTATXAXTGGTGGCCTGTCTCATCXCATACGTGAAAAGGCATAXACTAACGCTATCCCCAGGGTTCXAGACAXTACTACTXCGAAT
555987	Farua Brac Office; Belaichhari, Rangamati, Chittagong	GNXXGNCGTXNNNCCCXATXAXXGGCGGCNTATCATAACXANTNTANGAXXNGACAGGGACXGGTGATNAAACXCGAXCTAXAAANAXCCNCACTTTAAGT
555989	Farua Brac Office; Belaichhari, Rangamati, Chittagong	AGTXGGCATXGGCCCGCATXTTTAGTGGTTTGTTTCGATXCTTXTATAAGGAGACAGAXCCAAGXGCCGAAXGXAGACTCAXAGATAXTACCATTTCAXGT
555991	Ramu Upazila Health Complex (1); Ramu, Cox's Bazar, Chittagong	GGTCAGTGTXGATCCXTAAATTXGXTACXXAACXACXAXCAAXXCAAGAAAAGGCGGGXACTAACGCCGACACXCGGXXTXTXXXCATXXXTXXTACGAAT
555993	Bandarban Civil Surgeon Office; Bandarban Sadar, Bandarban, Chittagong	GAXTGGXGXXAACCCGTAXAAXTAATXCCTTATCTXAXTCCTXTTATAAGXAGXCGTGXATTGACGATGTCXCXAGGGCTCGAAATATTCCCGCTTCAAGT
555995	BRAC (BHP)-Naikhongchhari; Naikhongchhari, Bandarban, Chittagong	GGXTAAXXTXXXCXTCTXXXXXXGGXGGTXAXXXAXXAXXCXTXCXXXXXNAXXXGXXXXCXXXTGXTGXXXGXXAXXXTXGAAAXXXXXXCGTTTXXXGT
555996	BRAC (BHP)-Naikhongchhari; Naikhongchhari, Bandarban, Chittagong	GGTCGGCACXGATGTGTAACAGGGGTAXTTAGCCACATTCATTXTGTACGXAGXTGGGXATTAACGATGAACGXXGGCTCCTAAACAACCXTACTATAXGT
555997	BRAC (BHP) -Dighinala; Dighinala, Khagrachhari, Chittagong	AGTCAGTATGNATXTNTNTAAGTGGCGNNTANCCTTAACNATTTCGTGCAXAGXTNGAXACTAACGCTATAXCXCGGCTTNGAGACGACANTGCTTTAANT
555998	Bandarban Civil Surgeon Office; Bandarban Sadar, Bandarban, Chittagong	GGXNXGXXTXAACGXGXXXXXTXXGXGCNCXACCAXXXCGXXXXTATAXXXXGXCGXAXXCXGGCXACXTXXGXXAXGTTATXGCTAANACTGCXACAXAN
556003	Ramu Upazila Health Complex (1); Ramu, Cox's Bazar, Chittagong	AATCAATATGGACCTCTAACAGTAXCACTTAACCTTGTCCAAXXCGAGXXAAGXCAGXXXCTXACAATATAXGXAXAXXCAGCXXCATXXXXAXTACXGXT
556006	BRAC (BHP) -Lama; Lama , Bandarban, Chittagong	GGXTGACXTXGACXCCXXXXTXXGGCXCCCAGTCTXGXTGCATXTAAXCAXAGXCGXGXCCXGACXCCATCACXXGGGTTAGAAATGATXCCGCTTCGGGC
556007	BRAC (BHP) -Lama; Lama , Bandarban, Chittagong	XXXXXATXTXGATXXGXXXXXXTXXXXXXCAAXTXXXXCGCXXXTATAXXXAGXXGXAXACXAXXXCTGXXXCXXGXCTCXGAAAXAATACCXCTTTXXAT
556009	Ramu Upazila Health Complex (1); Ramu, Cox's Bazar, Chittagong	AGGTAACGCXGATGCGTGTAXGTGXTACXXXAXXACATCXXXXXXXAXCAAXGXCXXXXXCTXGCGATGTCXGXXXXXXCCXXXXCGXXXTXAXTXXXXXT
556012	Bandarban Civil Surgeon Office; Bandarban Sadar, Bandarban, Chittagong	AAXCNGCXNXGANCCGTAXAAXGAAXGCNCXGCNNXNXCGCNXXTANXXXXAAXCNXXXXNXGGCXATXTXXNXXGNNNNNTAAANGACCCCGCNNNNXNN
556014	BRAC (BHP)-Naikhongchhari; Naikhongchhari, Bandarban, Chittagong	GAGCGGTGCXAATGTGTATAATTGACGGCTTGTCATGTCGCTTXTGTAAGAAGATGGGXATTAATACCAAACCXCGGCTTCTAAACAXCATCGCTACGAGT
556016	Ramu Upazila Health Complex (1); Ramu, Cox's Bazar, Chittagong	GGTNANTGCXGATGTGCGTNAGTGXCGCXXXATCACAACXATCXTGTNCGGAGACXGXXXNTAANGCCGACCCXAGACXCCNAAXTGATATTGCTATXGGN
556025	Ramu Upazila Health Complex (1); Ramu, Cox's Bazar, Chittagong	XGGTGXTXTXGGCGCCXGXCXTTGXCACTXAAXCTCAAXXAXXXTXTACXGGGXCGTAXACXGGCAATAAAXCXXXGXXTCGCXXXXXXXXTAXAXXXXXX
556026	Lama Upazila Health Complex; Lama, Bandarban, Chittagong	GGGXANTGTXGACCTGCAAXXNTNGXANCTNACNTCAANXNTTXTGTNCAAAGACNGAXACXGGXGATGACXXXAGGGTCAXAAACGXCATTNNAXTAGNT
556027	Lama, Soroi Union, AKOTA Office; Lama, Bandarban, Chittagong	GGXCAGTXTXAACGCGTGXCATXGATAXTTTGTCAXAXTCCAXTTATAAGXAGXCAGAXACXGGTACXGTAXGXXGACTTAGAAACAACATCGCTATGXGT
556030	Lama Upazila Health Complex; Lama, Bandarban, Chittagong	AGGTAATGTXGACCCGCGXAAXXGAXGCTTXGXCTXAXTGCACXCGTAXGXAAXCAGAXXTXGACGCTXTXXCXXAACTCAGAACCGACACCATTATGXGT
556032	Ramu Upazila Health Complex; Ramu, Cox's Bazar, Chittagong	XXXNGGXXXGGANXXCXXXXXXXAGXGGTTAGCTXXAXCXCXCXCATXCXXXGXCGXGXXCXGGXXATXTXXCXXGXCTTAXAAAXAACATCGCTAXAXGC
556033	BRAC (BHP) -Lama; Lama , Bandarban, Chittagong	AAXTGGCXCXAATXCCTAXAAXXGACGXCCTGTCAXGXCGATXXTAAGXGXAAXTAGAXACXAGCGCCGTAXGXXGGGTCATAAAXGATATXATTACGXAT
556034	Ramu Upazila Health Complex (1); Ramu, Cox's Bazar, Chittagong	NAGTAACATXGATGTNTGTATGGAATGNCNNGCCTTAANNNATXCATAAANAAACGGAXATTAACACCNTCCCXCGAGTCCXAAANAACACCATTTCGAGT
556036	Lama, Soroi Union, AKOTA Office; Lama, Bandarban, Chittagong	AGXTAGTGTXAATCCGTGXATXXGACXXTCTGCTTXAXTGCATXTATAAGXAGXCAXAXACXAAXGACAACXCXXAAGTTAXCACTAXCACCGCTATAXGT
556043	BRAC (BHP) -Dighinala; Dighinala, Khagrachhari, Chittagong	GGTCAACATXGGCCCGCATAAGTAGTGCTCTGTCTCATCGXTTXTATGCAAAAACGGAXACTAGCGCTGACACXAGAGCTATXGXTAAXXXXXCTATGGAT
556044	Lama Upazila Health Complex; Lama, Bandarban, Chittagong	GGXCAGTGNXGATGCCTNXNATGGGTGCCTTGCCACGATGCTXTTATAAGXAGXCNGAXATTGGCANCAACCCXCGGGTCCGAAANAACCCCGCTTNNXAT
556046	Ramu Upazila Health Complex (1); Ramu, Cox's Bazar, Chittagong	AGGTAATATXGATCTGCGACTGTGGCGCTTAGTCTTAACCCTTXCAAAAGAGGATAGGXACTGGCGACATACCXXGAGTTCTAAACATCCTTACAACAAGC
556047	Alikadam, Chokhyong Union, AKOTA office; Alikadam, Bandarban, Chittagong	GAXTAGXGTXNGCGCGCGXNAXTNNCGCCTANTTTTGXTGCTXTTANNAAXAGXCNTGXACNANTGNTGTCACXCAANTTNXAGACAATCNCGCTACAXGC
556051	Lama Gozalia BRAC Office; Lama, Bandarban, Chittagong	GGGCGGCXTXGGNNCGCATCAGXNGTGCCNANNNNXNANGCNCTNANGNNXAGXCGGNXACTGNCGCCGNNXNXXGGCNTCGANACAATACNNNTACGXGT
556059	Lama, Soroi Union, AKOTA Office; Lama, Bandarban, Chittagong	GGXTGGTXTXGATXCGCXXCAXXGATXCTTXGTCTXGXCGCTXXCATAAGXAGXCGGAXACTGATGCCGTCCCXCGGGCCAXAGATAXCATCGCTACGAGT
556063	BRAC (BHP) -Lama; Lama , Bandarban, Chittagong	AAXCGACXTXGATCTGTAXAAGXGGTXXCTTGCCAXAXCGCTXTTAAAAGXAGXCAGAXACXGATAACATCXCXXGAGCTCGAGCCGATACCGCTACAXGC
556064	BRAC (BHP) -Lama; Lama , Bandarban, Chittagong	GXXTAATXCXGATCXCTXXAAXTGGXGCTCTGCCTXGXCGCAXXCATAXXXAGXCAXAXACXGACXXCXTXXCXXGACTTATAAATAXTCXTACTACGXGT
556065	BRAC (BHP) -Lama; Lama , Bandarban, Chittagong	AGXTAATXTXGACCCGXGXAAXXGGXGCTTXGTCTXAXTGCACTCGTAXGXAAXCAGAXATXGACGCTGTAXCXXAACTCAGAACCGACACCATTATGXGT
556066	BRAC (BHP) -Panchhari; Panchhari, Khagrachhari, Chittagong	AGGCGACGTGAGCGCCTAACTGTXXTGXXXXGXCATATXXXTXXCXTACXGAGATAXXXATAAACAACGTCCCXCXAXXTCXCXCCGAXXTXAXTXXXAXT
556067	BRAC (BHP) -Dighinala; Dighinala, Khagrachhari, Chittagong	GNXTAGCNTXNGNGTNTNTATGTGXCGCCCTGTNATGACGCACTTAAANGXGGXCGNAXATTAGTGCTAAAXCXAAXCTCAXAACTGACCCCGCTACAXGT
556068	Bandarban Civil Surgeon Office; Bandarban Sadar, Bandarban, Chittagong	AGTXGXCGTXAATCTGTGXXTGGAGCACTXTATCTTXTCXCATACATGCAAXGATGGAXCCAGACXCTATCCCXCGGGTCAXAGATAXTATCACTXCGAAT
556069	Ramgarh Upazila Health Complex; Ramgarh, Khagrachhari, Chittagong	GGTCAACGCXGACCTGCAAAAGGGACACCCAGTCACAACGCATXXXXXXXXXXXXXXXXXXXXXXXXXXXXXXXXGGGTTAGAAACATCACCGTTATGXGT
556070	BRAC (BHP) -Panchhari; Panchhari, Khagrachhari, Chittagong	GGTXAATGTXGACCCGTATXTTGGGCGCCTAGCCTCATCXCATTTAAGAAAXGATGGAGACTGACACTGTAACCAAAGTTAXAAACAXCACCGTTTTGAGT
556073	Lama, Soroi Union, AKOTA Office; Lama, Bandarban, Chittagong	GAXTAATXXXGATCCGTXAAAGTGGTGCCTXATCTTGTTGCTXTCATACAXGGXTATAXATXGGXGCCATAXCXXAACTCAGAAACAATACCACTATAXGT
556074	Lama, Soroi Union, AKOTA Office; Lama, Bandarban, Chittagong	GGXTGXXXTXGATXXGCXXXAXXGAXACTTAGTCTXGACGCTXXCATXXXXAGXCGXAXXCXGAXXCCGTXXCXXGXGCCAGAGATAXCATCGCTACGXGT
556075	Alikadam, Chokhyong Union, AKOTA office; Alikadam, Bandarban, Chittagong	GAXCNGTGNGNATGNGTNXXAXXNNCGCNNAATCAXGXNGNNNTNNAGCXXAGXTNXAXANXGGXGCTGACXCXXGGNTNAGANNNNXCANCGNTACGXGT
556076	Alikadam, Chokhyong Union, AKOTA office; Alikadam, Bandarban, Chittagong	ANXNNGXGTGNANXNGXATNATGNGTGGNNTGNCNNNATNNNCTNANGNGXANXTGGNXNNAANTNCNGNNXCXXGNGTCNXANNTANCANCNCTANAXNT
556078	Alikadam, Chokhyong Union, AKOTA office; Alikadam, Bandarban, Chittagong	AGTTAGTGCGAGTGTGCGXCTXTAACGGCTTATCXCAATGAATTCATACAXGAXTGGAXACXAGXACCATAXCXCAGCCCAXCAACATCATCGCTATGXGT
556079	Bandarban Civil Surgeon Office; Bandarban Sadar, Bandarban, Chittagong	GATXAGTGTXGACGTCTATXTGGGGTGCCTAXCTTTAACXAATTCATGCAGAGACGGGXATTXGXACCGTCCCXCGAGTTAXAGACAXTACCGCTXCGAAT
556081	Lama, Soroi Union, AKOTA Office; Lama, Bandarban, Chittagong	NNXCAGCXTXGACCNGXXXXAXXNGNXGTTNXTCXXAXTGNATTTAAAAXXNGXTGGAXATXAGCGCTGTAACXXGGGNTAGNNCTNNNACCGCTACGNAT
556082	Lama Gozalia BRAC Office; Lama, Bandarban, Chittagong	GGXCAATXTXGATCCGCGXCAGXGGCGCCCTGCCTXGXTGXACXCATAXAXAGXTATAXATXGGTAACATCXCXXGGGCTAGAACTGACATCACTATAXGT
556083	BRAC (BHP)-Ruma; Ruma, Bandarban, Chittagong	GGGXGATACXGGCGTGTATXAXTGGCGCTCAGCCTCAACXCATTTGAAAAGAGACGGAXACAGGCACTGTCCCTCGGGTTAXAAATAXTACCATTXCAGAT
556085	BRAC (BHP)-Ruma; Ruma, Bandarban, Chittagong	AGGXAATGCXGACGCGTATXAGTAGTAGTTAGXCTTGACXAATTCAAGAGAAGATAGAXCTTAACGACAACCCXCAAGCCCXAGACAXCACCGTTXCAAAT
556086	Lama, Soroi Union, AKOTA Office; Lama, Bandarban, Chittagong	GGXTGGTXTXGATXCGXAXXAXGGATACTTAGTCTXGXCGCTXTCATAXGXAGXCGGAXACXGATGCCXTCCCXXGGGCCATAGATAACATXXCTACGGGT
556087	Lama, Soroi Union, AKOTA Office; Lama, Bandarban, Chittagong	GGGCGGTXTXAACXCGTGXAAGXAXTXXCTTATCAXAXTCCAXXTATGAAXAGXTAGGXACAAATGATATCXGXXGGGCCAGAAATAXCATTGCTACAXGT
556091	Lama, Soroi Union, AKOTA Office; Lama, Bandarban, Chittagong	AAXCAGXXTXGATCXGTXXAAXXAGCACTCTGCTTXAXCGXAXXCAAGXXXGAXTAGAXACXGGCXXCATCXCXXGGGTTCGAACTAACCCCGCTATGXAT
556092	Alikadam, Chokhyong Union, AKOTA office; Alikadam, Bandarban, Chittagong	GATCAGTATGAATGTGTGTCATTAGCGCTCAATCACAXCGCTTXTGAGCGXAGXTGGAXACTGGXGCXGACXCXXGGGTCAGAXATAACACCGTTACGGGT
556093	Lama, Soroi Union, AKOTA Office; Lama, Bandarban, Chittagong	GGGCGGTATXAACCCGTGXAAGXAGTXGCTTATCAXAXTCCATXTATGAAXAGXTAGGXACAAATGATATCXGXXGGGCCAGAAATAXCATTGCTACAGGT
556098	Lama Gozalia BRAC Office; Lama, Bandarban, Chittagong	GGGTAGCXTXGGCXTGXAXXAXXGGTXXCTAGCCTXAXCGAAXTTAXGAAXAGXCGGAXACTGGCGCCGTAXGXXGGCCTAGCGACAATACCATTACGGGT
556102	BRAC (BHP) -Dighinala; Dighinala, Khagrachhari, Chittagong	AAXTGAXXTXAACXCGXGXAAXXAGTXCTTTGCTAXAACGAATTTATAAAXGGXTAGGXACXGGXACCGACXCXAGACCTCGAGACATTACCACTACGXGT
556104	BRAC (BHP)-Ruma; Ruma, Bandarban, Chittagong	AGXCAGCGTGAGTXTCTAXATXXAATXCCTTGCCAXAXCCCATXXXXXXXXXXXXXXXXXXXXXXXXXXXXXXXXGGCCTAGAAACGATXCTATTACGAGT
556105	BRAC (BHP) -Lama; Lama , Bandarban, Chittagong	XGXTAAXXCXGATXXGTXXXAXXGGXGGTTAGTCTXAXXCATTXTATAXXXAGXTAXAGXCXAGCXCXGAXXGXXGXCCCATAAACAATATTACTACGXGT
556107	BRAC (BHP) -Dighinala; Dighinala, Khagrachhari, Chittagong	AGGTGATXTGGATGTGXAXAAXTAGCAGCTTACCTCAXCCAACXTAAGAAXAGXTGXAXACXGACGACATAXCXXGGCCCAGAACCAACACTGCATTAGGT
556109	Bandarban Civil Surgeon Office; Bandarban Sadar, Bandarban, Chittagong	NNNTGNNNTXGANNTNNNTNATNGXCGCTTAACTACGACCAACXTATNNANAGACAGGCACTNANNCNGTNACXAXGCCTCTCXXCNAXXXXXXTATXGXT
556110	Alikadam, Chokhyong Union, AKOTA office; Alikadam, Bandarban, Chittagong	AGTTAGTGXGGGCXCGXATAAXXGGTGGCTAGTXTXAXTGCTCTTAAGAGXAAXXGGGXACTGATAAXATAXCXXGGCTTCGAGACATCATCACTATAAAT
556112	Lama Gozalia BRAC Office; Lama, Bandarban, Chittagong	GGXCGGTXTXGGCXCGXAXXAXXAGTXCCTAXCCAXAXTGCACTCAAGCGXAGXCGGAXACTGGCGCCGACXCXCGGCTTCGAAACAATACTGCTACGGGT
556113	BRAC (BHP)-Ruma; Ruma, Bandarban, Chittagong	AAGXGATGTXAGCCCGTGTXAXTAACAGCCTGTTTCGACXATTTTAAACAGAGGTGTGXCCAXACGACAACCCXCAGGTCAXAACCGXTACCGTTXCAGGT
556118	Lama, Soroi Union, AKOTA Office; Lama, Bandarban, Chittagong	AGXTAGTXNXAGNCTGTAAAAGTGXNXCCTXGCCNTGXCNCTCATNTGNGXNNXNGNAXATTGGCAANGTNXCXXNNGTNATAACTGACANCATTANAXAT
556119	BRAC (BHP)-Ruma; Ruma, Bandarban, Chittagong	AGXTGGXXTXGGTXTGXXXXXXXAGCXGTTAGCTAXAXCGAAXTCAAACXXAGXCGGGXACXGACACTGTCXCXCGGGCTAXCGACATTATCGCTATGXAC
556120	BRAC (BHP)-Ruma; Ruma, Bandarban, Chittagong	NNGXNNTGNXANNCNCTNTXAXTANNANTNTGTCNNGANXATTTNAAGNAANGANNNGXNCNGGTGCNATCCCCANGGNNNXAANCGXTANCGNTXTAGGT
556122	BRAC (BHP)-Ruma; Ruma, Bandarban, Chittagong	GGGXGATACXXGCGTGTATXAXTGGCGCTCAGCCTCAACXCATXXXXXXXXXXXXXXXXXXXXXXXXXXXXXXXXXGGTTAXAAATAXTACCAXTXCAXAT
556123	Alikadam, Chokhyong Union, AKOTA office; Alikadam, Bandarban, Chittagong	GAXNAATXTGGATGCGTGXXAXXGAXAGTCTGCCXXGXTCCXTXCGAXXXXAGXCAXGXXCXGGXXCTGAXXCXXAXGTCCXAAATGACXTCGCTXCGXGT
556125	Ramu Upazila Health Complex (1); Ramu, Cox's Bazar, Chittagong	XGGTXACGTXGGXGCCCGTCTTTXXXACTTAATXTCGAXGAAXXTAAGAGGGGGTGTGXACAGGXAATGTAXCXCXGXCTXXCXXCGAXCXTAXAXXXXXT
556126	Lama Gozalia BRAC Office; Lama, Bandarban, Chittagong	AAXCAGCXTXGGCGTGTAXAAXXAGTAGTTXATCAXGXCGCTTXTATACAXAGXCGXAXXTXGACACCATCXGXXGGGTTAGAGATAACCCTGTTACGXGT
556127	Alikadam, Chokhyong Union, AKOTA office; Alikadam, Bandarban, Chittagong	AGXTAATGTXGACGTGXAAAAGTGGCGGCTTGTTTCAATCAATTTATACGXAAXTGGAXCCXGGCACCATAXCXXGGGTTCGCGACGACACCGTTTCAAGT
556135	BRAC (BHP) -Lama; Lama , Bandarban, Chittagong	GAXCAATGTXGANCCGTAXXAGGGXTXCTTTGXCTXGXCCCACXTATAAAXGGXCNNGXACTAGCACCGTACGXXNGNTCAGAAACGACANNNCTNNGGGT
556136	Lama, Soroi Union, AKOTA Office; Lama, Bandarban, Chittagong	NGXNANTXNXGNNNCGTNXNAXGNATAGNNNANNNXNANGCANXNANXXAXAGXNNGAXACXAACXATATCXCXXGNNNNCTANANNACACNNNTACNXGT
556137	Lama Gozalia BRAC Office; Lama, Bandarban, Chittagong	AAXCAATGTXGGCGTGTAXXAGXGGTGGTCTATCAXAXTGCATTTATGAGXAGXCGGGXACTGATGCCATAXGXCGAGTTAGAACTGACCTCGCTATGXAC
556138	BRAC (BHP)-Ruma; Ruma, Bandarban, Chittagong	GATXAATGTXGACCCCTATXAGTAACGCCTAGTCTCGTTXCATATAAAAGAAGACGTGXATTGGTGATATCCCTAAAGCCAXAACTGXCACCACTXTAGAT
556139	Alikadam, Chokhyong Union, AKOTA office; Alikadam, Bandarban, Chittagong	AGTTAATGTGGACGTGCAXAAGTGGCGGCTTGTTTCAATCAATTTAXACXXAAXTGGAXCCTGGCACCATAXCXXGGGTTCGCGACGACACCGTTTCAXGT
556147	BRAC (BHP)-Ruma; Ruma, Bandarban, Chittagong	GGGXGATGNXNANCTNTAAXAGTAGCNCCTTGTCTNGNCXCNTXXXXXXXXXXXXXXXXXXXXXXXXXXXXXXXXANCTCAXAAATGXCXCCNCTXNAXGT
556149	Lama Gozalia BRAC Office; Lama, Bandarban, Chittagong	AAXTAATXTXGGCCXGCAXXXXXXXXXXXXXXXXXXXXXXXXXXTATNXAXAGXCGTAXXCXGGCGCCXTXXGXXAGGTTCGAAACAATACTGTTATGXGT
556150	Lama, Soroi Union, AKOTA Office; Lama, Bandarban, Chittagong	GNXNGGCXTXGNNXNGTXXXAXXAGTXCTTANTTNXGXNNCAXXNAAGCAXGGXCNGAXACXGACGCCGNXXNXXGGGTNCGAGACAACACCNTTACGXGT
556151	BRAC (BHP)-Ruma; Ruma, Bandarban, Chittagong	GATXAATGTXXATCTCTAAXAGTAACGCCTAGCTTTGXXXCATATAAAAGAAGACGTGXATTXGCGAXATCCCXAGGCXCAXAAATGXCACCACTXCAGGT
556152	Lama Upazila Health Complex; Lama, Bandarban, Chittagong	GAXCNACXTXNACXXGTXXAAXXNNXGCTTTNCNNXAXNNCNXXXXXXXXXXXXXXXXXXXXXXXXXXXXXXXXXXXXXXXXXXXXXXXXXXXXXXXXXXX
556154	Lama, Soroi Union, AKOTA Office; Lama, Bandarban, Chittagong	XGXXAXXXTXAGCCXGXXXXAXXAGXGCTCTGTCTXAXTGCXXXTATAXXXXGXCGXAXXCXGGTXCTGTXXGXXGXCTCCXAAAXGACACCACAACAXGC
556156	Bandarban Civil Surgeon Office; Bandarban Sadar, Bandarban, Chittagong	GGGXAATGTXGATCCGTAAXAGTAGTGCCCTGCCATGTCXATTATAAACAGAGGCAGAGCCTGACAATGTCCGCCAACTCAXAAATAXCXCTATTXTAGAT
556157	BRAC (BHP) -Dighinala; Dighinala, Khagrachhari, Chittagong	GGXTAGTXTXGACCTGXAXCAGTAGTGGCTTGTCATAXCGATTTTAAGCXXAGXTGXAXCCXGACXCCGTAXCXXXXXXXXXXXXXXXXXXXXXXXXXXXX
556158	Ramgarh Upazila Health Complex; Ramgarh, Khagrachhari, Chittagong	GGXCAGTACXGACGCGTATATTGAATGCCTAGTCTTAXTCCATTTATAAGXAGXTGTAXACXAATAACGTCCCXXGGCTCCXAGATATCCTCACTATAXGC
556159	BRAC (BHP) -Dighinala; Dighinala, Khagrachhari, Chittagong	AGXCAGXXCXGGTXCGCGXCAXXGGCAGCCTGTCTXAACGCATTTAAGAXXAGXCGGAXATXGGTGCCGACXCXXAGCTTAGAGACAXCACTGTTACGGAT
556161	Ramu Upazila Health Complex; Ramu, Cox's Bazar, Chittagong	AAXCAATXTXGATXXGTXXCAXXGGTAGCTAACCTXGXCGCATXTATXXGXAGXCGXGXXCXGGCACCGACXCXXGGGCTCXCGACAACATTGCTACGXGT
556162	Bandarban Civil Surgeon Office; Bandarban Sadar, Bandarban, Chittagong	GGTTGATACXAACGCGTATAAGTGATACXTXATTTCGTXCXXXXTGTGAGAAGGCXGXXXCTAGCAATGXACCXAAAGXTCTXXXTAXXCXXXXTTCXGXT
556164	Ukhyia Upazila Health Complex; Ukhia, Cox's Bazar, Chittagong	GATNAGTGTXAGTGNGTGTCANTAGTGGTNTATCACAANCATTXNGAACGGAGNCAGAXATTNNTAANAANCGXCGANTTCTAAANGACANCGCTACAGNT
556166	BRAC (BHP) -Dighinala; Dighinala, Khagrachhari, Chittagong	GGXCAACXTXAGTXCGXXXAAXXGATGCCCAGTTAXGACCAATTTAXAAAXGGXCXGGXATXGGTACXGACAGXAAACTTCXAGCTATCACCACTACGXAT
556167	Ramu Upazila Health Complex; Ramu, Cox's Bazar, Chittagong	AGXTGGCGTXAGTXTGTXXAAXXAGTGGCTTGTCTXAXTGCATXTAAAAAXANXCGXGGACXAACACTGTCXCXXGAGCTCTAGATAACACTGTTTNAXAT
556168	Bandarban Civil Surgeon Office; Bandarban Sadar, Bandarban, Chittagong	NNNTGNNNTXGATNTNTNXNATNGXCGCTTAACTACGACCAACXTATNNANAGANAGGXACTNANNCNGTNACXXXGCCTCXCXXCGAXXXXXXTATXGXT
556169	Lama, Soroi Union, AKOTA Office (2); Lama, Bandarban, Chittagong	GGXTAGTXTGAGCGTGXGXAAXGGGTAGCCAGTCTXAXTCCATXCAAXAAXAGXCAXGXACXGACXCTGTCXGXXGAGCTAXAGCCAACACTGCTATAAAT
556170	BRAC (BHP) -Dighinala; Dighinala, Khagrachhari, Chittagong	AGXTAGXXNXGACXCNXXXXAXXNGCXNNCTGCCTXNACGNNTTTANGNXXGGXNNGAXACXAGCGNTGNAXCXANXXNTCGNAACATTANTNCTACNXAT
556171	Ramu Upazila Health Complex (1); Ramu, Cox's Bazar, Chittagong	AGTCAACGCXGACGCGTGTAATGGATAGCTAGCCTTAACGAATATGAGAGGGGACGTGXATTGGTACTGTCCCXCGGGCTCXAGATAACATCGCTATAAAT
556174	Lama, Soroi Union, AKOTA Office; Lama, Bandarban, Chittagong	GAGCGATGTXGACCTGCGACAGTAGCGCNCTGTCTTGACGCATTTANGCAXAGXXAGGXACTNACAATATAACTAGGGTCATCGACAACACCGCTATAXGT
556178	BRAC (BHP) -Panchhari; Panchhari, Khagrachhari, Chittagong	AGGTAGTATXAACCCCTAAAATTGGTAXCCAGTTTCAACXAAXXTATAAAAAGACAGAXACTGACGCCGXAACXCXACCCATXXXCATTXXXAXATTXAXT
556179	BRAC (BHP) -Dighinala; Dighinala, Khagrachhari, Chittagong	GGXCAGTGTXGACGCGTAXAAGGGGCXCCTTGCTTTAXTGCATXCATGCGXGGXTGGAXATAGACACCGTAXCXXGGCCTCXAAACATCACCACTATGGAT
556180	Ramgarh Upazila Health Complex; Ramgarh, Khagrachhari, Chittagong	NGTNNATATXAGTGCGTAANAXNGNTGGTCTNTCTCATCCAACTNNNNCGXAGXTGXAXACXGGCACTXAAXCXXAAGTNAXANANAATCTTGCTACGXNT
556181	BRAC (BHP) -Dighinala; Dighinala, Khagrachhari, Chittagong	AGXCGATGCXAACCCGXGXCTXTGXTGCCCTATCAXAXCGCTXTCAAAAXXAAXTAGAXATXGGCAATATCXCXXGGCTCAXAGATGTTACCATTACAXGC
556183	Lama, Soroi Union, AKOTA Office (2); Lama, Bandarban, Chittagong	AATCAAXANGNNNGTCCNXCATXGGTANNNTGTCNTATNGCTTTTAAACAXNNXTNTAXCCXGACACCGTCXGXXNNNTCCXAAACGACACTGTTNTNGAT
556186	BRAC (BHP) -Dighinala; Dighinala, Khagrachhari, Chittagong	GGXCGNXXTXGANXTGXAXAAXXAGCXCCCTACTTXAATCCATTCATGAGXAGXTGGAXACTAACACCGTAACXCAGGCTCGAAATAXCATCGTTACNXGT
556188	BRAC (BHP) -Dighinala; Dighinala, Khagrachhari, Chittagong	AGGCAGCATXGGCCCGXATATGTAGCGGCCAGCCTTAACCCATXTAAGAGXGGXTGXAXATTGACACTGTCXCXCGGGTTATAAACATCATCACTTTAGAT
556189	Lama, Soroi Union, AKOTA Office (2); Lama, Bandarban, Chittagong	AATCGACATGGATXTGTATAAGTGGTAGCTTGCCAXAACGCTTTTAAAAGXAGXCAXAXACXGATAACATCXCXXGAGCTCGAGCCGATACCGCTACAAGC
556190	Ramgarh Upazila Health Complex; Ramgarh, Khagrachhari, Chittagong	AGGTAAXGTXGACCTGCATCAXTAATAGCTTGCCATAACGCATTTATGCAXAAXCAGAXACAAACACTAACXCXCGGGCCAGAAACATTACCGCTACGXGT
556191	Ramu Upazila Health Complex; Ramu, Cox's Bazar, Chittagong	GAGTAATATGGACXTGTGXCATXAATGGCCTACTTCAXCGCATXTATGCXXAGXCGXGXCCAGAXAATGTCXCXXAGGTCAXAAAXATTACTXCTACAAGT
556194	Ramu Upazila Health Complex; Ramu, Cox's Bazar, Chittagong	GAXCGGCANGNANGTNTATAATXAGTGNCTTNCCNXGXCCCACXTATACXXAGXCAXGXCCXXAXXNNAACXCXXNGNCNAXANACNXTACCGTTATNAGN
556195	BRAC (BHP) -Dighinala; Dighinala, Khagrachhari, Chittagong	GGXCGGTXTGNACXNGXAXATGTGATGGCTAGTNTXNXCGAATTNGAAAXXANXNNXNXACXGACGNNNTCXGXXNAGNTAXAAANATTANCGCTACNNAC
556196	BRAC (BHP) -Dighinala; Dighinala, Khagrachhari, Chittagong	AGXTGGTATGGATXCGTAXATXXAGTXCCCTATCAXGXCCCTTXCGTXXXXAGXCGXAXACXAACXCTXTCXCXXAGGCTAXAGACAXTATCGCTATGAGC
556198	Bandarban Civil Surgeon Office; Bandarban Sadar, Bandarban, Chittagong	ANGXNGTNTXNNCCCGTNTXNGTGNNGNNCTNCCNNNANXCTNNNANNAGNNGANAGAXNNTGATGCTGTNCNTCANNTCNXAGANNXCANNGNNXCNGAN
556200	BRAC (BHP) -Dighinala; Dighinala, Khagrachhari, Chittagong	AGXCAXXXTXXACXTGXXXATXXGGCXCCTTATCTXAACGAATXTATAAXXAGXCAGAXCTTAACGCTATCACXAGGCTTAGAAACGATACTGCAACGXGT
556201	Ramgarh Upazila Health Complex; Ramgarh, Khagrachhari, Chittagong	GGTNAGNNTXGNCNNNTAAAATXNNTGCCNNGTNNCAATNCACTTNNNNNXAGXNNGAXNNTGANNCNAACCNXCNACTCAGAAACNATANCNCTTNGXNN
556205	BRAC (BHP) -Dighinala; Dighinala, Khagrachhari, Chittagong	AGXTAAXXTXAATXTGXXXAAXXAGTACCTAGCTAXAACGCATXTGTGAGXAGXTGGGXACXGGXGCCGTCXCXCGGGTTCGCAATGACATCGCTACGXGT
556206	Ramu Upazila Health Complex; Ramu, Cox's Bazar, Chittagong	AGGTNNCGCGGACXNGCAXAAXGNGTAGCTAGCCTTGXCGNATXNAAAAXXAGXCAXAXNTTAGCGCXXANXCXXGNNTCCGANCCAACATTANTACNGGT
556208	Ramu Upazila Health Complex; Ramu, Cox's Bazar, Chittagong	AGXCAATXCXGACXCGCAXCAXXGACGCCTTGTTAXGXCCCACXCATGXXXAGXTGXAGXCXGACGATXTXXCXXGGCTTCTAGCTGACATCGTTATAXGT
556209	Lama, Soroi Union, AKOTA Office (2); Lama, Bandarban, Chittagong	XAXCAACXNGNNNGXCCGXXATXGGTANNNTGTCNXAXNGCTTTTAAXXXXNNXTGXAXCCXGACXCCGTXXGXXNNGTCCXAAACGACACTGTTNTNGAT
556210	Lama, Soroi Union, AKOTA Office (2); Lama, Bandarban, Chittagong	AGTTGATACXGACCCGTGACATGGXCACXXAAXTTTATCXATXXTATACAGAGATGGAXATTAACACCGACACXCAGGXTXTXXCCGXXXXXXXAACXGGT
556213	Bandarban Civil Surgeon Office; Bandarban Sadar, Bandarban, Chittagong	AGTXGNTATXNNNCNGTATXAGTGGTGNCCTGCCTTNANXCNTATATGAGGGGACGGAXNNTGATGCTGNNCNNNNGGTNAXAGANAXCXNCGNAXNNGNC
556214	Panchari Upazila Health Complex; Panchhari, Khagrachhari, Chittagong	NGTXAGTNTXAACNNGTNTXTTNNGTGGCNNGTNNCNANXNNTTTATNAGGGNNNNGNXANANNCGCTNANACXNGANNTAXANNCNXTANNNNTTCGXNT
556215	Ramgarh Upazila Health Complex; Ramgarh, Khagrachhari, Chittagong	XGXCANTXTXGANXXGXXTXTTXGGTGGCNTGNNACAXNGNATTNXTAAXXNGXCGXNGXCXNNNXCCAAXXCXXGXCTTNGAAACNTNANNNCTTCNXGT
556216	BRAC (BHP) -Dighinala; Dighinala, Khagrachhari, Chittagong	AGXCAGCATXGATXCCXGTAAGTGGTGGTCAATCTTAXCCATTXCGAAAXXAGXTAXAXACTGGCGCXGTAXCXXGGGTTAXAGAXATCACCACTATAAAT
556217	Lama, Soroi Union, AKOTA Office; Lama, Bandarban, Chittagong	AGTCGACGCXAACGTGCATAAGXAGTGGCCAGCTACAATCCATATGAGCGXAGXCAGGXCCAGACGCTGTACCCAGGCTTCGAAACATCCCTACTATGGAT
556221	Lama, Soroi Union, AKOTA Office (2); Lama, Bandarban, Chittagong	AGTTGACGCGGGTGCGTGXCAXGAGCXGCTTGTTAXAXCCCTTXTGAGAAXGGXCGGAXACTGATAACAACXCXXAAGCTCXAAATGTCCTCGCTTCAGGT
556225	Ramu Upazila Health Complex; Ramu, Cox's Bazar, Chittagong	GGGNAGCGNGGACXCGTAXAAGXAGCGCTNTATNNCGXCGCACTTANGAAXGGXNGGAXXCXAACGNTGACXGXCAACTTAXAAANATCCCCATTATNAAN
556228	Lama, Soroi Union, AKOTA Office (2); Lama, Bandarban, Chittagong	GGGTAATXCXAATCCGXATXTXXGGCXGCCAACTTXAXCGCATACGTGCAXAGXTGTGXACTAACGCTATAXGXXGAGTTAXAAATAXCATTGTTACAAAT
556229	Bandarban District Hospital; Bandarban Sadar, Bandarban, Chittagong	AATTGATATXGATCTGXAXAATGGGCXXCTAACCTTAATGXAXTCATAAGXGGXCAGGXATAAGCGXXGTCXGXCGAGTCCGAAXCGATATCGCTATAXGC
556233	Matiranga Upazila Health Complex; Matiranga, Khagrachhari, Chittagong	GGTCGGTACXAATCCGCATCAGXGATXXTXAGTXTCATXGXAXXCATGCGAAGATGGAXCTTAACGCTGTACCXAGAXXCXTXXXCATXXTXXXAACXXXT
556236	Lama Gozalia BRAC Office; Lama, Bandarban, Chittagong	AAXTAGTXTXGANCNNCAXAAGGNGTGXTCTNTNNXNXNGCAXXTANXXAXAAXCGGAXATXAACGXNGNCXGXXGANTCNGANACGACNNNNTTACAXAT
556237	BRAC (BHP) -Dighinala; Dighinala, Khagrachhari, Chittagong	AAXCAGTXTXANTCCNXGXAAXGNAXGXCTTNTCTXAXCGCNXXNATXXAXANXCGGAXXCXGGCAANGTXXNXXGGNNNNGANACANCCCCGCNNTNXNT
556239	BRAC (BHP) -Alikadam ; Alikadam, Bandarban, Chittagong	AGXTAGCXTGGACXTGTAXCAXGANTGCTNTATTTXGXCGCTTTCATGCXXGGXCGXGXCCXAGCXCTXTXXGXXAAGTTCXAGACAACCCTGCTATAAGT
556240	Alikadam Upazila Health Complex; Alikadam, Bandarban, Chittagong	XXXXXXXXXXXXXXXXXXAAAGTGGTGGCTAACCATGXCGAATATATGAXXAGXTGGAXCCAGGCACTGTAXCXXAAGTCCGCAACATCXTCGCTACGGAT
556242	Alikadam Upazila Health Complex; Alikadam, Bandarban, Chittagong	AGGTGATXTGGACXCGXAXAAXXAGCGGCNAATCAXAXCCNTTXCGTXXXXGGXNAXAXANXANCXCNGTAXCXXAGGCTCXNNCCANCACCANTATGAGT
556249	BRAC (BHP) Matiranga (1); Matiranga, Khagrachhari, Chittagong	GGTXAATATXAATGTCTAAXAGTGGTGGTTTGTTACATCXATTATAAGCGAGAGCGGAGACTAGCAACAACACCCGGGTTAXAXACAXCACCATTTCAGAT
556250	Bandarban District Hospital; Bandarban Sadar, Bandarban, Chittagong	GAXCGGTXTXGGCGCGXGXAAGTGGCGGXCTATTATGXTGAATTCAAGCGXAGXCGGAXACTGGXACXGTAXCXCAACCTCXAAACAXCXCCGCTACAXGT
556251	Alikadam Upazila Health Complex; Alikadam, Bandarban, Chittagong	XAXTGATGTGAACXCCTAXXAXXAGXXGCTAGTTAXGXCGCAXXTAAXXXXGGXCGXAXXCXAGXXCTGTXXCXXGXGCCAXAGACATCXCCGCTACGXGT
556252	Bandarban District Hospital; Bandarban Sadar, Bandarban, Chittagong	XXXXXXXXXXXXXXXXXXACATTGATGXTTTGTCACAACGCAXXTATAAGXAGXTATAXACXGGTGCXGACXCXCGGCTCATCGACAACATCGCTACGXGT
556253	Bandarban Civil Surgeon Office; Bandarban Sadar, Bandarban, Chittagong	AAGXGATATXGGCCCGTAAXAGTAGCAGTTAATTATGACXCTTTCATAAGGAGACGGAXACTAACAATGAAACCCGGGTTCXAAATAXCATCATTXCGAGT
556254	BRAC (BHP) -Dighinala; Dighinala, Khagrachhari, Chittagong	GGTTGACATGGATXTGXAXAAXTAATGCCCAGTCACAXCGCAXTTAAXCGXAGXCGGAXACXGATACCGTAXCXXGGCTCCGCGATAACACTGCTACGAGT
556255	BRAC (BHP) -Dighinala; Dighinala, Khagrachhari, Chittagong	GGTCGAXATXGGCXCGCAXXXXXXXXXXXXXXXXXXXXXXXXXTTATGAGXAGXCATAXCCTAGCACCATCXGXCAGGTTAXAGACAXTXTTATTACGAGT
556260	Lama, Soroi Union, AKOTA Office (2); Lama, Bandarban, Chittagong	GAGCAATGCXGACCCCCGAAAGTGGCGXCCXACCTCGTTGXTCXCATAAGXAGXTGGAXACAGGCAATXACCCXXGGGTTATAGCTAACACCGCTACAXGT
556261	Ramgarh Upazila Health Complex; Ramgarh, Khagrachhari, Chittagong	GGXNAGNNTXGNCNNNTAANANTNNNGCCNNGTNNCANTNCANTTNNANNXAGXNNXAXNNTGNCNCNAACXNXXNACTNAGAAACNANANCNCTNNGXNN
556263	Lama Gozalia BRAC Office; Lama, Bandarban, Chittagong	GGXTGGTXTXAACCCGXATAAGGAACAGCCTGTCAXGXCCCATXCAAGXAXAGXCGTAXATXGATXCTATCXGXXAGGCCCXCGACATCACCACTTCGXGT
556264	Lama, Soroi Union, AKOTA Office; Lama, Bandarban, Chittagong	AAXCGACXTXGATCTGXAXAAXXGGTXGCTTGCCAXAXCGCTXTTAAAAGXAGXCAGAXACXGAXAACATCXCXAGAGCTCGAGCCGATACCGCTACAXGC
556265	Ramu Upazila Health Complex; Ramu, Cox's Bazar, Chittagong	GAXCGGTACGGATXTGCGXAATTGACXCCTTGTTAXGXCGCTTXTGAAAXXAGXTAXAXATXGGXXCTGACXGXXGGCCTCGAAACATCACTACTATGXAT
556266	Lama, Soroi Union, AKOTA Office (2); Lama, Bandarban, Chittagong	AGXTGATACGGACXXGXGXCAXGGGCACCCAATTTXAXCGCTTXTATXXXXAGXTGXAXXTXAACXCXXAXXCXXAGGTXAXAGCXGXCACCGCAACAGGT
556268	Ukhyia Upazila Health Complex; Ukhia, Cox's Bazar, Chittagong	XXXTGXXXTXXXTXXXNAXXXXXXGXXXXXAXXXXXXXXXCXXXTAXXXXXAXXXXXGXXTXXXXXCXAXXXXXXAXXXXATXXATXNXCXXACXXTAAXT
556272	Panchari Upazila Health Complex; Panchhari, Khagrachhari, Chittagong	AGXCGATATXAACCCGTGTCAXGAGCAGCTTGCCTTAACGCATXTATGAGXAGXTGTGXXCXGGCAATGTCXCXXGAGCCAGAAATAATACCGCTATAGGT
556273	BRAC (BHP) -Alikadam ; Alikadam, Bandarban, Chittagong	AGXCAATGCXNACGTNXNXCAGXGGCGGCCAGTNNTGANNCATACAAACAXANXNGXGXNCXGAXXATAANXNXXGNGTTNGAGACAATACTGCTACGGAT
556275	BRAC (BHP) -Panchhari; Panchhari, Khagrachhari, Chittagong	GGGXAACXXXAACCCCTXAXXTTGGXACCCAGXCXCXXCXCATTXATAAXXGXAXAGXXXXXAAXGXXXTAACXXAAXCCAXAXATXXCACCATXTTXXAT
556277	Chittagong Medical College Hospital; Panchlaish, Chittagong, Chittagong	AGTTGACGTGAATCCCTGXCATXXXTACXTXGXXTTGTXXXAXXCAAGAGGAAACGGAXATTAGTGCCGAAACXAXAGXCXXXXXCAAXCTXAXAATXGXT
556278	Lama, Soroi Union, AKOTA Office (2); Lama, Bandarban, Chittagong	AAGCAACXTXGACCTGTAXAXXXAGCXGTTTACCAXGXTGCAXXTGTGCGXAGXTAGAXACXGATGCCGTCXGXXGGCTTXGAAATGACXTCGCTATGGAT
556279	Bandarban District Hospital; Bandarban Sadar, Bandarban, Chittagong	GGXCGGXGTXGGCGCGTGXXAXXAAXGCTNNNTCAXAXNGAATTCANAAAXAGXTAXGXCNXGGXACTGTAXCXXAGCCCAGANANGANACCNCTNCAXAT
556280	Lama, Soroi Union, AKOTA Office (2); Lama, Bandarban, Chittagong	GAXCAXTXCXGACXCCCGXXXXXXXXXXXXXXXXXXXXXXXXXTCATAXGXAGXTGGAXACXGGCAATAACCCXXGGGTTAGAGCTAACACCGCTACAXGT
556281	Lama Gozalia BRAC Office; Lama, Bandarban, Chittagong	GGXTNNCXTXAACCCGXAXAAXXAGCXGCTTGCNNXGXCGCATXNAAAAAXAAXCGGAXNNXAATGCCXTCACXXGNCTXCGAAATNACANCNCTANGAAT
556282	Ramgarh Upazila Health Complex; Ramgarh, Khagrachhari, Chittagong	XAXTAAXXTXGATCCGXAAXATXGATXGCTAXTTAXAXTGCXCXXATAXXXAGXXAXAXACXAAXXCCXXXXCXXAXGTTCGAGCTATCACCACTAXAXAT
556284	Ramu Upazila Health Complex (1); Ramu, Cox's Bazar, Chittagong	AGGCGGTGTXGATCTCCAAAXGTXXCGXTTAGCTTCAACCXACXCXTGCAAAGACXXXXXCAXGCAATGXAXCXCGGCXTXTXAXTAAXXTXXCTATAGGC
556285	Bandarban Civil Surgeon Office; Bandarban Sadar, Bandarban, Chittagong	GAGXAGTATXGATGCCTAAXAGTAATAGCCTATCTCATTXCTCTTAXGCAGAGATGGGXCCTAACGACGTACCTCAGGCCAXAGCCGXCACCGCTXTAGAT
556286	BRAC (BHP) -Alikadam ; Alikadam, Bandarban, Chittagong	GAXCANCGCGNATGCGTAXAAXTNATXGCCAGCNTXAXCNCTTTCATACXXGGXCGNGXACXAGCXATGTCXCXXAGGTCNGAGANNNNACCGTTACAAGT
556290	Chittagong Medical College Hospital; Panchlaish, Chittagong, Chittagong	AGGTAATGTXAACCCGTATAAGTGXXAXXTXAXTACAAXXAACXTATGAAGAGAXAGXXCCTGGCACTGTCCCXCAGGXTATXAXCATXCXXXXTATGAAT
556292	Lama, Soroi Union, AKOTA Office; Lama, Bandarban, Chittagong	AATTAGCGTGAACCCGTGACXTGXAXGCTXAAXXATATCCAAXXTATAAAGAAGTGGAXACTAGTAACATAACXCAAGCTCXXAXXAXXXTTXXTATXAXT
556294	BRAC (BHP) -Panchhari; Panchhari, Khagrachhari, Chittagong	GGTXGGCATXAACGCCCATXAGGGGTAGCTAGTTATGTCXATTXTAAGAAGAGACATGXACTAGTACCGTACGXXGGCTTCXCAATGXTATCACTXCGXGT
556295	Bandarban District Hospital; Bandarban Sadar, Bandarban, Chittagong	GGGCGGCATXGGTCCGCATCAGXAGTGGCTAGTTATGATGCATTCAXGCAXAGXCGGAXXCTGATGCCGACAGCAGGCCTCGAGACAACACCGCTACGAGT
556296	Alikadam Upazila Health Complex; Alikadam, Bandarban, Chittagong	ANXNNNTNNGNNTGNNTNXANGTNGTGNCNNNCNNCNXNGNNCXTANGCXXAGXNGGAXACXGNCACCNNCXCXXGGGTTNGANACNANANNGCNACGANN
556298	Lama Gozalia BRAC Office; Lama, Bandarban, Chittagong	GGXCAATXCXAATXCGXXXXAXXGGXXGCTTGTCAXGXTGCTTXTGAGXGXGGXCAGGXXCXGGCACTXAXXGXXGGGTCATAACTAACATTGCTATAGGT
556300	Matiranga Upazila Health Complex; Matiranga, Khagrachhari, Chittagong	GNTCANTATGAGCCTGTGXAAGGXATXCXXAACTTCAACCXAXXTATGCAGAGACGGAXACTGGCGCCAXCCCXAXACXCXXXXXTGTXXTXAXTATXGXT
556301	BRAC (BHP) -Dighinala; Dighinala, Khagrachhari, Chittagong	AGTTGATGCGAATGCGCATAATTAGCACCTTATCATGACGCTTXTAAGAGXAGXCAGGXACTAATACCATCXCXXGACTTCXAAACGACXCCGCTACAAGC
556302	Panchari Upazila Health Complex; Panchhari, Khagrachhari, Chittagong	AGGXAGTATXAACCCCTAAXATTGGTAGCCAGTTTCAACXCATXTATAAAAAGACAGAXACTGACGCCGTAACXCAACCCAXAAACAXTACCACATTGXAT
556303	Lama Upazila Health Complex; Lama, Bandarban, Chittagong	ANNTNANGNXGANCCGCATANTTNGNANTCAANNNXGXNNNNNXTANGNXXAGXCGGAXACAAACACCGNAXNXXAGGTNAGANACNNNCTCGNTANNGGT
556305	Lama Gozalia BRAC Office; Lama, Bandarban, Chittagong	GAXCAGCGTXGACCCGTATAAGXAXCGCCCTGTCTXGXTGCTCXTAAACAXAGXCAXAXACXGGXGACATCXCXXAAGCTAXAAATGACACCATTATAGAT
556306	BRAC (BHP) -Dighinala; Dighinala, Khagrachhari, Chittagong	AGXCAATACXAATXCCTGTCATTGGTXCCCTGTCTTGATGCATACGTACAXGGXCAGAXACTGACGCTAAAXCXCAGCCTCGAGCCGACACTACTACGGAC
556307	Lama Gozalia BRAC Office; Lama, Bandarban, Chittagong	GGXTAATXCXGATXCGTXXCAXXGGTGXTTXGTCTXAXCCATTXTATAXXXAGXTAXAXXCXAGCACXGAXXGXXGGCCCATAAAXAATATTACTACGXGT
556308	Alikadam Upazila Health Complex; Alikadam, Bandarban, Chittagong	GAGXAGCGCXGATGCGTGAXAGTAGTACCTAGCCTTGTCXCATTTXTACXGAAATGGGXACTAACGATGAACCTXGGGCTAXAGATAXCCCCGCTXCAAGT
556310	Lama Upazila Health Complex; Lama, Bandarban, Chittagong	AAXTANCATXAACCTNTAANNTXNGCGCNTNGTNNXGANGATTTCNTGNNXGGXNGTNXANNAGNNCTNTCCNXXGNGCTCTAAANATTATNGCTANAGGT
556311	Lama Gozalia BRAC Office; Lama, Bandarban, Chittagong	GGGCGATXCXAATCTGTAAAATTAGCXCCTTGTCTXGXCGCTTTCATAAGXAAXTGGGXACXGGTGAXATAXCXXXGXTCAXAAXTGXCACCXCTATAXGX
556313	Lama Upazila Health Complex; Lama, Bandarban, Chittagong	AGTCAGTGCXGACGTGCATAATXGGTGGCTTGCCATGACCCATTCGAAAAXAGXTGGAXATTGACAACXACXCXXGACTTXTAACCAACATCATTATAAAT
556314	Lama Gozalia BRAC Office; Lama, Bandarban, Chittagong	AGXTGXTXTXGACXXCTXXAAXGAGCXXCCXGCCAXGXCGCAXXCGTGXXXAGXCGXAXACXGAXGCCGTXXCXXAGGCTCXAAATGATCTCACTACGXAT
556315	Lama Upazila Health Complex; Lama, Bandarban, Chittagong	GNGTAATGTXGACCTGTAACAGGGGTAGCTTGTTACGACGAATXTATGAXXAGXCAXAXACXGGCAACATCXCXXGGCCTCTANATAATACCGCTACAAAT
556318	BRAC (BHP) -Dighinala; Dighinala, Khagrachhari, Chittagong	AAXCAACXCXAATXCCXGXAAGTGGTGGCTTGTCACAXCCCTTTTGTGXAXAGXTGXAXCCXGACXXTGAAXCXXGACTCAGAXATAATACCATTACAAAT
556320	BRAC (BHP) -Dighinala; Dighinala, Khagrachhari, Chittagong	GGGTAGTGTGGATGCGTATATGXGGTAGCTTGCCAXATCGATTTTAAAXAXGGXTGXGXACXGATACXGTCXCXXGACTCCGAAACATCXCTGCTATAAAT
556321	Lama Gozalia BRAC Office; Lama, Bandarban, Chittagong	AAXCGGTGCXGACGCGTGACTTXAGTXCTCAGCCAXGXTGXACATAAACGXAGXTGGAXACAGGCACCAACXCXCGGGTTAXAAACAXCACCGCTACGXAT
556323	Lama Gozalia BRAC Office; Lama, Bandarban, Chittagong	NGXTANCXNXGANXXCTXXCAXXGGCGCCCTGTNAXAXTCANTTCATGAGXAAXTNXGGACXGGNGATXACXCXXGAGTTNTANANANNATCNNTACAXGT
556324	BRAC (BHP) -Lama; Lama , Bandarban, Chittagong	AGGCAATGTXGATCCGCAACAGTGXTAXXXXGXXACATCCAAXXCGTGAAAAGGTGTGXACAGGCACCATCACXCXGGXCXXXXXXXTXXTXXXTXTXGXT
556325	BRAC (BHP) -Dighinala; Dighinala, Khagrachhari, Chittagong	GGTCAGTGCGAATGCCCAXCTGTAGTGGCTTGTTTCAXCGCTTACATGCAXAGXTGTAXACTAGCGATGTCXCXXAAGTTCGCAACAXCATCGCTACAGGT
556326	Chittagong Medical College Hospital; Panchlaish, Chittagong, Chittagong	AGGCGGTATXAACCCGCATAAGTGXTGCXXXGCXTTGAXXXXXXTXTGAGGGGACXGAXCTTGATGCTGTCCGXCAGGXCXTXXXTATXXXXXXAACXGAC
556327	Lama Upazila Health Complex; Lama, Bandarban, Chittagong	GNGCGGTXTXNACCCGTNTAAGTAGTNNCTTANCACAXTCCATTTATGNNXNNXNNGGXACXANTGATATCAGXXGNNCCAGNAANATNATNGCTACNGGT
556328	Lama Upazila Health Complex; Lama, Bandarban, Chittagong	GNTTNNTGTXNATCTGTAXXXXXXXXXXXXXXXXXXXXXXXXXTTNNANGXGNXNNGGXACXGATAATGTNXCXXGGGNTNGAAANATTANCGCTNNANAT
556329	Lama Gozalia BRAC Office; Lama, Bandarban, Chittagong	GAXCAXXXCXXACXXGXXXAAXXAGCGCCCTGTCTXGXTGCTCXTAAACAXAGXCAXAXACXGGTGACATCXCXXAAGCTATAAATGACACCATTATAXAT
556330	Lama Upazila Health Complex; Lama, Bandarban, Chittagong	AGTTAAXATXAACCCGTAAAAGGAGTAGCCAACCTTGTCGCATTTATACGXAAXCATGXACAAACACTGACXGXCGGGTCCTAAACATCACCGTATCAAGT
556333	Chittagong Medical College Hospital; Panchlaish, Chittagong, Chittagong	GGGNAANGNXAATCCGNAAAAGXGGTGCXCXGXTTTATXCANXXTANANNNAGACGGXXATTAGTGCCATACCXCGAGXCXTXXXTAXXXXXAXTXTXAXT
556334	Alikadam Upazila Health Complex; Alikadam, Bandarban, Chittagong	GNXNANCXTGGGNGTGXAXAAGXNGXNGCTAANTNXGXTGNTTTTATGXXXGGXCGXAXANXAGCXCCATXXGXXGXGTTNGNGANAXCACCGTTACNAGT
556343	BRAC (BHP) -Dighinala; Dighinala, Khagrachhari, Chittagong	GGGCAGTATXGATGTGTAXATGTGACGCXXXACCACGTCXAAXXTXAAXAAAAACXGXXACXAAXGCTGXCACXXGAGXTCTXGXCGXTCTXACTAXGAGT
556346	Chittagong Medical College Hospital; Panchlaish, Chittagong, Chittagong	XGXTAGTXTXXACXXGXGTXAXXGGXGGCTTGCNAXGXCCCTCXTGTACXXXGXCAXGXACXAACXATXTXXCXXGXGTCATAAACANCANCGTTACAGAT
556349	BRAC (BHP) -Dighinala; Dighinala, Khagrachhari, Chittagong	AGTNAACGTXANCGTCTATAATTGXTACXTAAXTTNAACCAAXXTGAGAAGAGGCGXAXACTGNTGANGXAACXNXGXXCCXXAXCGAXCTXXXTXTXGXT
556350	Sindukchhari BRAC Laboratory Office (2); Mahalchhari, Khagrachhari, Chittagong	AATXGGCATXGGCCCGCATXATGGATGCCTAATCTCGACXAACTTGTAAAGAGACGTGGACTXACACCGTCCGXXAACTCAXAAACGXCCCTACTTTGAGT
556351	BRAC (BHP) -Dighinala; Dighinala, Khagrachhari, Chittagong	GGGTAGNATGAANGCGTAXXXXXXXXXXXXXXXXXXXXXXXXXXTAAXXAXAGXNGXAXACXGGCXCCATAXCXXAGNTNAXAAATGACNTCACTATGNNT
556355	Chittagong Medical College Hospital; Panchlaish, Chittagong, Chittagong	XGXCGGTGTXGATCCGTGXCAXXAGXGCTTTGTCAXGXCCCTTXTATAXGXAAXTGXGXCCXGATXAXXTXXCXXAAGTTATAAATAANCTTATTACAAGT
556363	Chittagong Medical College Hospital; Panchlaish, Chittagong, Chittagong	GGGTAACGNXNGCGTGTGXAATGXXTGCXTAAXXANATCCAAXXTATGNANANACGTGXATXAACANTAXCAGXCGGGXTCTXXXCGACACTGXNACAAGT
556364	BRAC (BHP) -Dighinala; Dighinala, Khagrachhari, Chittagong	AATCAACACGAATXCCTGXAAXXGGXGGCTTGTCAXAXCCCTXTTGTGXAXAGXTGGAXCCXGACAXTGAAXCXXGACTCAGAGATAATACCATTACAAAT
556366	BRAC (BHP) -Dighinala; Dighinala, Khagrachhari, Chittagong	GGXTANCXNGGGTXTGTAXAAXXGGXXNTTAANCNXGXTCATXTNATGCAXGGXCGXAXCCXAGCXCTGTCXCXXANGNCNGNAATNANCNCNCTNNGAAN
556367	BRAC (BHP) -Dighinala; Dighinala, Khagrachhari, Chittagong	GGGCAGCATXAACGTCTGTCTGTGXTGXXXTAXTATAACCATXXXXAGCGAXGACAXXXXCTGATGCCGXCCCXCXACCTXXXXXXXAXXXXXXTXXXAXT
556371	Sindukchhari BRAC Laboratory Office (2); Mahalchhari, Khagrachhari, Chittagong	GANXGANATXAGCNNGTNTXTGGNATACCCAACTTCAANXCATTTATNCGNAGACGGAGACTGNCGCNGTCCCXAGNCTCAXAGATGXCATCACTTNGGAT
556373	Naikhongchhari, Baishari BRAC office; Naikhongchhari, Bandarban, Chittagong	AGGXAGTGCXAACGTGTGTXAXGGGCAGCCTGTTTCGACXCATACATGAAGGGACGGAXCCTAGTAATATCACCAAGGCCCXAGATAXCCTCGCTXCAXGT
556374	Naikhongchhari, Baishari BRAC office; Naikhongchhari, Bandarban, Chittagong	AGGCAATGCXAATGCGTGTAATGGGTGGTTAATCTTAACGAATXTAAGAGGGGATGTGXCTAGGTACTGTCCCXCGGCCTCTAAATAACATCGCTACAGGT
556375	Naikhongchhari, Ghumdum BRAC office; Naikhongchhari, Bandarban, Chittagong	GNGCNNTNNGNNTGTGTAXAATXGNCGGCNNGTNAXGXCGCTTTTNNAAXXAGXTGGNXANXANTXNTAAAXCXXNNNTTCGAANNATCATNGCTACNNGT
556376	Alikadam Upazila Health Complex; Alikadam, Bandarban, Chittagong	AGGCAATATGAATCCCTAACATGGGCACCCTGCTATAACCAATTCAAGAGXGGXCGGAXATTGATACTGAAXCXAGGCTCCGAAACAATACTGCTACAGGT
556378	Ramu Mukti Office; Ramu, Cox's Bazar, Chittagong	GNGCGNTGTXAANCNNTNXNATGGXTACTTXAXTTCNNCCXXXXTXTACAAAGNTAXXXCTAXNTNCNATCXCXAAGGCCCTXAXTGAXXTXXXTATGGGC
556380	Naikhongchhari, Ghumdum BRAC office; Naikhongchhari, Bandarban, Chittagong	GNXNGGTNNGGATGNGTATAATXNNNGGNNTGNTATAXCNNTTXTGTAAXXAGXNGGGXACXAACAACGTAXCXXAANTTCGAAACNNNACTACTNCANGT
556383	Ramu Mukti Office; Ramu, Cox's Bazar, Chittagong	GGGCAACATXGACCCCTAAAAGGGXCAXXXAAXCATGTCXAACXXGAACXGXGACXGXXXCTXGCGATGXAXCXAGGCXTCTXACTATTXXXXXTACAGGT
556390	Ramu Mukti Office; Ramu, Cox's Bazar, Chittagong	GGTNANTNCXGATGTGCGTNAGTGXCGCXXXAXXACAAXXXXCXTGTNCGGAGACXGXXXNTAATGCCGXCCCXNGACXCCNXAXTGATATTXXTATAGGN
556391	Ramu Mukti Office; Ramu, Cox's Bazar, Chittagong	NNGCAGCXTGGACXTCXAAATTGGGCGGCTAATCNCAXCGATTTCAAGAGXGGXXGGAXACTGGXGCCGTCXCXXGACNTNXAAATAACXTCGCTACGXGC
556393	Naikhongchhari, Baishari BRAC office; Naikhongchhari, Bandarban, Chittagong	XXXXXXXXXXXXXXXXXXXXAXGAAXXGCNAGCNXXAXCGCACXNGTXXXXXNXNGXNXACXGGCXATGTXXCXXNNGTCNGANATGANACCNNTACAANT
556394	Lama, Soroi Union, AKOTA Office; Lama, Bandarban, Chittagong	GAXNAGTXTXAANXCGXGXNAXGNNXGGCTTGTNTXATNNCNTXCAAGCAXAGXCGXAGCTXANCXCNGTAXNXXGGGTTAXAGCTAACACTATTACNXGT
556396	Alikadam Upazila Health Complex; Alikadam, Bandarban, Chittagong	AGGTANNNTGAATNCGTNXNAGNGACGCTXAGCCATGAXXAAXXCATGAGGAGNCXXXXXCAGACGCCGXACGXAXGGXCCXXXXTATXXTXXXTXCXAXT
556397	Naikhongchhari, Baishari BRAC office; Naikhongchhari, Bandarban, Chittagong	AAXTAGTACGGATXTGTGXCAXXAXTAGCCAXTTTXAATGCATXCGTGXAXAGXCGXGXCCXGACACTXTCXCXXGAGCCAGAACCATCACCATTTTAAAT
556398	Lama, Soroi Union, AKOTA Office; Lama, Bandarban, Chittagong	NGXNAGTXNXAANXCGNXXXXXXXXXXXXXXXXXXXXXXXXXXTNATAXGXAGXCNXAXANXNNCXANXNXXCXXNAGTNNTNNNTNANANCNCTATNXNT
556401	Naikhongchhari, Baishari BRAC office; Naikhongchhari, Bandarban, Chittagong	GGXCGACANXGACCTCNAXAXXXXXXXXXXXXTXXXXACXXXXTXXXXXXXXXXXXXXGXXXXXTXXXXXXXXXXXXXXXAXXXXXXXXCXXXXXXXXXXX
556402	Lama, Soroi Union, AKOTA Office; Lama, Bandarban, Chittagong	AAXCAGXXTXGATCXGTGAAAGXAGCACTXTXCTTXATCGAATXCAAGXXXGAXTAXAXACXGGCXCCATCXCXXGGGTTCGAACTAACCCXGCTATGXAT
556403	Alikadam Upazila Health Complex; Alikadam, Bandarban, Chittagong	AGGCAATATGGACXTGTAXXAXXGATAGCTTATCTXAXCCCTTXCGTGAXXAAXCAGAXATXGATXCCGTAXCXXGGGTCAXAAACGACXCCGCTATGAGT
556404	Alikadam Upazila Health Complex; Alikadam, Bandarban, Chittagong	GNXCAGCANGGATXNGTAXCTGTGNTXNCTTGCNATAXNGAATTCATGAAXAAXNNGAXACTGNCGATGACXNXXNGGNNCXANCCAANANCGCTANAAGT
556405	Naikhongchhari, Baishari BRAC office; Naikhongchhari, Bandarban, Chittagong	AGGTANCGTGGATGTGTGXNNTGGGTXCTNTGTNTCAXTCCATTCNAGCAXAGXTATGXNNTAGCGCCGTAXCXXGGGNCAGAGATATTATTGNTTCAGGT
556406	Alikadam Upazila Health Complex; Alikadam, Bandarban, Chittagong	GGTCAGXGTXAACXCGCGXCAXXAGTXGCCAGCCTXGXCGCTTXTATAAXXAGXCGXGXACXGATGCCATCXCXXGAGTTCGAAACGTCATTACTTCGAGT
556408	Naikhongchhari, Baishari BRAC office; Naikhongchhari, Bandarban, Chittagong	GAXCGAXACGGATXTGTGTAAXXGGCXGTCAGTTAXGXCCCACTCATGCAXAAXTGGAXCCTAACACCATCXCXCAGGTTAXAAACAATCCTACTACGGGT
556410	Naikhongchhari, Baishari BRAC office; Naikhongchhari, Bandarban, Chittagong	ANXCGGTGTGAANXTGTAXAAXXGGTXCCNNGCNTXAXCCCATXTATACXXAGXTGXAXCTXGAXXCCATCXCXXNGGNCCXAAATAACATCGTTACGAGT
556411	Alikadam Upazila Health Complex; Alikadam, Bandarban, Chittagong	XXXCGGCXCGXACXTGCGXXTXXGGTGCCTAGTTTXAXTCAAXTTATXXXXGGXTAXAXACXAACXCCGTAXCXXGXCTTCXAGATATTACCACTACAXAT
556415	Alikadam Upazila Health Complex; Alikadam, Bandarban, Chittagong	GGXCAACXCGGANGCGTGXATXXAGTACCCTATCAXGXCGCTTTCAAGCAXGGXCGXAXACXGGCXATGTCXNXXGGCTTAGAGATAACCTCGCTATAAGT
556417	Naikhongchhari, Baishari BRAC office; Naikhongchhari, Bandarban, Chittagong	GATNAATNTXGATCTCTAACAGTAACGCCTAGCTTTNTCGNATXNAAACAAAGACAGGXANTAGNGACATCNCXANNNTCAGAACTGACCTCACTNCAGGT
556421	Naikhongchhari, Baishari BRAC office; Naikhongchhari, Bandarban, Chittagong	GGXTGGXXTXAACCTGXAXXXXXGGTXCTTTXTCAXGXCGATXTTATAAGXAGXCGGAXACAAACGCTGTAAGCCAACTTAGAAACAXTACCGTTACGXGT
556422	Bandarban Civil Surgeon Office; Bandarban Sadar, Bandarban, Chittagong	XXXXXXXXXXXXXXXXXXXAAXGAGXGNCTTACCTXAANNCACXNATGCXXANXCNXAXNCXGGCXNNNNCXCXXAGNTTAXAGACGTNANNNCTANNANN
556423	Bandarban Civil Surgeon Office; Bandarban Sadar, Bandarban, Chittagong	AAGCAGTXTGGATGCCCATATXGAGCGGCTAATCTXGACCATCACATAAAXAGXCAGGXACXGGCGATATCXCXXGAGCXCGAAXCAXCACCGCTACAGAT
556426	Bandarban Civil Surgeon Office; Bandarban Sadar, Bandarban, Chittagong	GGTTAGTGTGGATXNCTATCAGGGGTGNCTNATNTTATCCNATTTATAAAXAGXTGGNXACTAATNNNATCXCXCAAGTCNXAGANATNACCGCTACGXAT
556427	Bandarban Civil Surgeon Office; Bandarban Sadar, Bandarban, Chittagong	XAXNAXXXXXGXTCXXXXXXAXXGGXXCCCTXTNXXAXCCNTXXCAAXXXXANXTGXAXACXNGCXCTGTXXCXXGXCTCAXAGCTANCACCACTACAXAT
556430	Lama, Soroi Union, AKOTA Office; Lama, Bandarban, Chittagong	NGXTAGTXTXAATCCGTGXATXXGAXXXTNXGCNTXAXTGCACXXXXXXXXXXXXXXXXXXXXXXXXXXXXXXXXAAGTNAXCACTNACANCGCTATAXGT
556431	Bandarban Civil Surgeon Office; Bandarban Sadar, Bandarban, Chittagong	ANTCGACGCGGNCGTGXAXAAXXNGXGNNNAGTNAXAACNCATXTGAXXXXAGXNAXAXXCXGAXXNTXAXXNXXGXGCNCGAAACNNTANCNXTACGAAC
556432	Lama, Soroi Union, AKOTA Office; Lama, Bandarban, Chittagong	GGXTGGTXTXGATXCGXXXCAGXGATACTTAGTCTXGXCGCTTXCATAAGXAGXCGXAXACXGAXGCCXTCXCXXGGGCCATAGATAXCATCGCTACGXGT
556436	Naikhongchhari, Baishari BRAC office; Naikhongchhari, Bandarban, Chittagong	XGGTGACXTXGGCCCCCGXAXXGAGXXGCTTXXCXXXXCXCXTXCXXXXXXXXXXGXAXXXXXXTXCXXXXXXXXXXGXXXTAXAXXXXATCXCXACXXAX
556437	Bandarban Civil Surgeon Office; Bandarban Sadar, Bandarban, Chittagong	AGXNAGTANXAANXNGTATAAXGGGTXCTNNNNNNTAXCNCATTTANGAGXAGXNGGAXANTANCGANNTCXCXXANCTCCGANANATNACCNCTATNAGT
556439	Lama, Soroi Union, AKOTA Office; Lama, Bandarban, Chittagong	AGXTGGTXTXGACCTGTGACATXGGTAGCTTATTTTAACCCTTATATACGXAAXTAGGXCTTAACACXGTCXCXXGGGTCATAGACGACACCACTTCGXAT
556440	Lama, Soroi Union, AKOTA Office; Lama, Bandarban, Chittagong	GGGCAGCATXGGTCCGTGXCAXXAXTGCXCTACCTXAXTGCAXTTATACAXAGXCXXAGACTGACGCTATAXCXXGGGTCAGAAACGACACCACTATAXGT
556441	Lama, Soroi Union, AKOTA Office; Lama, Bandarban, Chittagong	AAXNAXXXTXANCXCGXXXXAXXGGXXCCTTGCCAXAXTGXTCXTXTAXXXAGXCGXAXXNXGACXATGNXXCXXAXGTCAXAGATAACANCANTATAXAT
556442	Bandarban Civil Surgeon Office; Bandarban Sadar, Bandarban, Chittagong	AGXCAGCXCXAGTGTCXAXAAGXAGTXCXTTGTCAXAXCCAAXTXATGAXXGAXCGXAXACXAATACTGTAXCXXAAGTTXXAGATAXCATTACTXTGXAT
556444	Lama, Soroi Union, AKOTA Office; Lama, Bandarban, Chittagong	AAXTGGTXTXAXTCXGCGXCAXXGGTXGCTTGCCTXGXCGCACXTATAXXXAGXCGXGGACXGATXATGTCXCXXGXGTTCGAGACGATATCGCTTTAXAX
556445	Bandarban Civil Surgeon Office; Bandarban Sadar, Bandarban, Chittagong	AGXNAGTANGAANXNGTATAAXGGGTACTNNNNNNTAACNCATXTATGAXXAGXNGXAXANXANXGANGTCXCXXAACTCCGANANATNACCNCTATNXGT
556449	Bandarban Civil Surgeon Office; Bandarban Sadar, Bandarban, Chittagong	AGXCAATXCGGACGTGTAXAAXXGGXXGCCAATCAXGXTGCACTTATXXXXGGXCGXGXACXGACXCTAAAXCXXGGGTCCXAAACAACACTATTATAXAT
556451	Lama, Soroi Union, AKOTA Office; Lama, Bandarban, Chittagong	GGXTAATXTXGGTCTCTXXAAXGGGCXCTTTGCCTXGXTCXAXXCATAAAXAGXTAXGXACXGGTGCTGTCXCXXGGGTCCGAAATAATCCCGCTATGXAT
556453	Ramu Upazila Health Complex; Ramu, Cox's Bazar, Chittagong	GGTTAGTGTGGATXNCTATCAGGGGTGNCTNATNTTAXCCNATTTATAAAXAGXTGGNXACTNANNNNATCXCXCAAGTCNXANANATNACCNCTACGAAT
556454	Naikhongchhari, Baishari BRAC office; Naikhongchhari, Bandarban, Chittagong	ANXNANCXNGNNNXXNXGXXXXXXXXXXXXXXXXXXXXXXXXXXNGTXXXXAGXCGXAXXTXGACXCNXTXXCXXGNGCNAGANACATCACCANTNNANAT
556455	Ramu Upazila Health Complex; Ramu, Cox's Bazar, Chittagong	GGXCGGCXCGGATGTGTAXCAXXGGTAGTTAGCCAXAXTCATXXTGTACGXAGXTGGGXATXAACGATGAAXGXXXXXXXXXXXXXXXXXXXXXXXXXXXX
556457	Ramu Upazila Health Complex; Ramu, Cox's Bazar, Chittagong	AAXCGAXGTXAATGTGXGXAAXTGGTGGTCAGCCAXAXCGCATXTATGAAXXGXTGXAXCCXGGXXCTGTXXCXXGAGTTAGAACTGACXTCACTATAGGT
556458	Ramu Upazila Health Complex; Ramu, Cox's Bazar, Chittagong	AGXTNACXNGGANXCGTAXATXGAGTXGCTNGNNTCAXCGAATXXXXXXXXXXXXXXXXXXXXXXXXXXXXXXXXGGCTNAGAACCAACATCNCTACNAGT
556460	Naikhongchhari, Baishari BRAC office; Naikhongchhari, Bandarban, Chittagong	GAGCGAXACGGATXTGTGTAAGXGGCXGTCAGTTATGXCCCACTXATGCAXAAXTGGAXCCXAACACCATCXCXCAGGTTAXAAACAATCCTACTACGGGT
556461	Ramu Upazila Health Complex; Ramu, Cox's Bazar, Chittagong	GGXCAGXGCXAATGTCCAXAAXXAGTGCCTAGCCACGXCGCAXTCAAGAXXAGXCGGGXCCXXGCGATGACXGXCGAGTCAGAACTGATXCCACTACGGAT
556462	Bandarban Civil Surgeon Office; Bandarban Sadar, Bandarban, Chittagong	AAXTAGTATGAATXCGXGXCAXGGGTXGCTAACCTTAXTGCTCATGAGAAXAGXCGTGXACTGACGCXGTAXCXCAGCTTAGAGATATCACTNCTTTGGAT
556463	Naikhongchhari, Baishari BRAC office; Naikhongchhari, Bandarban, Chittagong	AGXTGACGTXGATGTGTAXXTXXGGTACCTAACCTXAACGAATTCATGXAXAGXTAXAXATXAACXATXTCXCXXGGGCCAGAAACAACACCGCTATGAAT
556464	Ramu Upazila Health Complex; Ramu, Cox's Bazar, Chittagong	AGTTGNCNTGAATXCGTAXAAGGAGTGGTTANCTATGXTGCATATAAGNAXAAXTGGGXCCAGGCACCGTAXGXANGGTTCXAGNCATCATTATTTTGAGT
556465	Ramu Upazila Health Complex; Ramu, Cox's Bazar, Chittagong	AAXCAGTGTGAATGTGTAXAAXXGGCGGCTAGNTNXAXCGCTCXCGTXXXXAGXCGXAXACXGGCXXTGTXXCXXGGGTTCGAAACATTACCGCTACAAAT
556467	Chittagong Cantonment (CMH); Bayejid Bostami, Chittagong, Chittagong	AGXCAACGCXAATXTGXGTCAXTNATNCCTAGTCNXGATCCATTCANGCXXAGXCGXAXANXGATXCTXAAXCXXGGGNNAGAACCATTACCGCTTCGAAC
556469	Ramu Upazila Health Complex; Ramu, Cox's Bazar, Chittagong	AGGTNNCGCXGACXNGCATANTGNGTXGCTAGCCTTGXCGNATXCAAAAAXAGXCAGAXNTTAGCNCCNANXCXXGNNTCCGANCCAACATTACTACNGGT
556471	Ramu Upazila Health Complex; Ramu, Cox's Bazar, Chittagong	AAXTAAXGTXGACGCGXAXCAXXAGTXGTCTGTTTXGXCGCATTCGAGAGXAGXCGXGXACXGATAATATCXGXXAACTCCXAGATATCACCACTATAAGT
556472	Naikhongchhari, Baishari BRAC office; Naikhongchhari, Bandarban, Chittagong	XGXTAATXCXXATCXGNXTNATGANNGNTCAGCTNTGTCGCTTXCXTNAXGAGANGGNXATNGGCGATATCCNXAGGCTNATAAACAACNCNGCTATANAX
556475	Ramu Upazila Health Complex; Ramu, Cox's Bazar, Chittagong	AGXCANCXTGGNNXTNXGXAAXXGNTGNCCNNNCNXAXCCCTTTTNNXXAXGGXCGXAXACXGACXCCGACXNXXAGGTNCGANACGXNACCGTTTNGGNN
556476	Naikhongchhari, Baishari BRAC office; Naikhongchhari, Bandarban, Chittagong	GAXCGATAXGGATXTGTGTAAXXGGCXGTCAGTTAXGXCCCACTCATGCXXAAXTGGAXCCXAAXACCATCXCXXAGGTTAXAAANAATCCTACTACGGGT
556478	Ramu Upazila Health Complex; Ramu, Cox's Bazar, Chittagong	AGXCAGCXNXGNNXNNXXXAAXXGNTXNCCNGNCNXAXCCNNXTTNNGAXXGGXNGGAXACTGACACCGNCXNXXXGXTXNGAGXXGXCXCCXXXXXGXXX
556480	Ramu Upazila Health Complex; Ramu, Cox's Bazar, Chittagong	AATCAAXGTXGATXTGTATCAGTGGTXGCTAACCTTGXCGCATTTATGAGXAGXCGTGXACTGGCACCGACXCXCGGGCTCXCGACAACATTGCTACGAGT
556481	Chittagong Cantonment (CMH); Bayejid Bostami, Chittagong, Chittagong	AGXCAACXCXAATGTGTGTCATXAATXCCTAGTCAXGATCCATXCAAGXXXAGXCGXAXATXGATACTXAAXCXXGGGTTAGAACCATTACCGCTTCGXAC
556492	Thanchi Upazila Health Complex; Thanchi, Bandarban, Chittagong	NGGXNNTATXNNTCNGXNAXNGGNGNGNCCTGTCATNANXCNNTCAANAAGNGNCGGAXCNNGNTAACNTCNCTAAGGNCNXNGNCNXNXNTGNTXNAGGC
556493	Thanchi Upazila Health Complex; Thanchi, Bandarban, Chittagong	XXXXXXXXXXXXXXXXXXTXNGTANTGNCNANTXTTGNCXANTXXXXXXXXXXXXXXXXXXXXXXXXXXXXXXXXNNNTNNXANNNNXCXNCNCTXNAXXN
556495	Ramu Upazila Health Complex; Ramu, Cox's Bazar, Chittagong	NNTNNNTNNXNATGCNTATNAXTNGTXNCTNANNNTGXNNNACXNNAGNAXAGXNNTAXCNTAGCXCNATNXCXXNNNNNNXAANNNNNATNNNNANNNNN
556498	Thanchi Upazila Health Complex; Thanchi, Bandarban, Chittagong	AGGXAGTATXGGCGCGTGTXTGTAGTGGCCAATCTTGACXATTTTATAAAGAGACGTGXACTGACGCTATCACCCAACTTAXAACTGXCCCCACTXCAAGC
556499	Thanchi Upazila Health Complex; Thanchi, Bandarban, Chittagong	AGGXGGTATXGATCCGCGTXAXTAACGCCTAGTTTTGTCXCATTTGAGAAGAAACAGAXACTGGTGACGTCACCAGGGTCCXAGACAXCATCGCTXTAGGT
556506	Sajek Brac Office; Baghai Chhari, Rangamati, Chittagong	AGGXAGTGTXGACCCCTAAXATTGGTACCTAGCCACGTCXCATXTAAAAGGAGACGGAXATAGGCACCGACCCXCAGCCTCXAAATGXTACCGCTTCGGGT
556508	Thanchi Upazila Health Complex; Thanchi, Bandarban, Chittagong	AGGXGGTATXGATCCGXGTXAXTAACGCCTAGTTTTGTCXCATTTXAGAAGAAACAGAGACTGGTGACGTCACCAGGGTCCXAGACAXCXTCGCTXTAGGT
556516	Alikadam Upazila Health Complex; Alikadam, Bandarban, Chittagong	GGTNANCGNXNGTCCGNAANANTGXCAXXTAGCXNNNNCXAAXXCGTNAANXNANXGXXXTTXANGCNGACCCXAXGXCCCXXXCCGAXXTTXXTXTXGXT
556518	BRAC (BHP) -Rajasthali; Rajasthali, Rangamati, Chittagong	AGTXAATATXAACCCGCAAXAGGGGTAGCTTACCTTATCXCTCTCAAAAGGAGATGGAXACAAGXACCGTACCXAGAGTTAXAAATAXTACCACTTTAAAT
556523	Chillchari Brac Office; Jurai Chhari, Rangamati, Chittagong	AAGXGACGTXXACCTCXATXATGGATGCCTAGCCTTATCXCATXTATGCXAGGATXTAXACAXAXXCTGTCCCTAGGGTCAXAAATGXTATCGCTTTGXAT
556526	Alikadam Upazila Health Complex; Alikadam, Bandarban, Chittagong	AAGTGATGCGAACCTGTGAAAGTXXTAXTTAGXXACATCXAXCXCGTGCAAXGGTXGXXXCTXGTACTGXAACXCAAGXTATXGXCATCCXXGCTATXGGC
556528	Alikadam Upazila Health Complex; Alikadam, Bandarban, Chittagong	AGGTGGCXCGAACCTGTGTAAGGGXTGCCCAATXTTAACGAAXXXXAGAGAAGGTXGXXACAXACAACATACCXCXGCCCCTCXXTATTXXTAXTACXGXT
556536	Belaichari Upazila Health Complex; Belaichhari, Rangamati, Chittagong	GGTXAGTGTXGACGTCTATXAGTGGTACCTAATCTCGTCXCTCTTAAGAGAAGACGGGXACAAGCGCCATCACXCGGCTCAXAACCGXCATCACTTTAGAT
556538	BRAC (BHP) -Rajasthali; Rajasthali, Rangamati, Chittagong	GAGXAACGTXAATGCGTAAXTTTGGCAGCCTGTCTCGTCXCATXCGAAAAGAGATGGGXACTAGCACCATCCCCCAGGTTAXAAACGXCACCGCTTTGAGT
556540	Chillchari Brac Office; Jurai Chhari, Rangamati, Chittagong	GGGXAATGTXGGCCCGCATXTGTGGTACCTAACTTTGTCXAATTTAAGAGGAGATAGGGCCTAACACTGTAACTAAAGTTAXAAACGXCATCACTTCGGAT
556544	Kubbang Brac Office; Barkal, Rangamati, Chittagong	AGGXAATGCXGATGTGTATXAXTGGCAGCTAACTATATTXATTTTATACGGAAATGGAXACTGGTAATATCCGXAGGCTTCXAAACGXCACCGCTTTAXGT
556546	Alikadam Upazila Health Complex; Alikadam, Bandarban, Chittagong	GGGTGGCGTGAACCTGCATCAGTXXCAXXTAGCXACGTCXXAXXCATGAAGAAACGGAXCCTAACGCCAACCCXAXACXTCTXXXTAXXXXXXXTACXAXT
556551	Ramu Mukti Office; Ramu, Cox's Bazar, Chittagong	AGTCGGTATXGATCTGCATAAGTGXTAXXTAGCTACATXXXTXXTATACAAAGACAGAXXCAGACGATGTCACXAXXXXXCGXXXCXXXXTXXXTXXXXXT
556552	Alikadam Upazila Health Complex; Alikadam, Bandarban, Chittagong	AAGTGATGCGAACCTGTGAAAGTAGTAXTTAGTCACATCXATCXCGTGCAAGGGTGGAXACTXGTACTGAAACXCXAXXXXXXXXCXTXCXXXXTXTXGXC
556553	Ramu Upazila Health Complex (1); Ramu, Cox's Bazar, Chittagong	XATCAACATXGACCTGTAAAAGTGGTXCCCTATCTTAATCCATXCAAXCGAAGATGGGGATTAACACTAAACCXAAACCTAXAAATGATXCCGTTACGGGT
556555	Alikadam Upazila Health Complex; Alikadam, Bandarban, Chittagong	AATCAGTGCXGATCTGCGACATGGXCACTTXGCXTTAACGXAXXCATAAGAGGGTGGAXACTAACGCTGTCCCXCXXXXXXXXXXXGAXXTXXXTXTXXXT
556556	BRAC (BHP) -Rajasthali; Rajasthali, Rangamati, Chittagong	GGGXAGTGTXAGTGCGTAAXTGTGGTAGCXTGTCTTGTCXCATTCATGAGAAGATGGAXAXXAGCACCATCCGXCAGGTXXXAACTAXTACCGCTTTGAGT
556560	BRAC (BHP) -Rajasthali; Rajasthali, Rangamati, Chittagong	GGNXAATGNXANTCCGTAAXTGTGGTGGCTAATCACAACXCTNTTATGAGGAGATGNAXACTAANGCTGTCACXAGGGNTCXAAATAXTACTNNTTNNGGC
556561	Chillchari Brac Office; Jurai Chhari, Rangamati, Chittagong	AGTXGGTATXAGCCTGCATXATTGGCAGCTAGCTACAACXCACTTATAAAGAGACGGAXACTAACGCTGACACTAAAGTTAXAAACAXCATTACTXCGGAT
556565	Chillchari Brac Office; Jurai Chhari, Rangamati, Chittagong	AGTXGGTATXAGCCTGCATXAGTGGCAGCTAGCTACAACXCACTTATAAAGAGACGGAGACTAACGCTGACACXAAAGTTAXAAACAXCATTACTTCGGAT
556566	Ramu Upazila Health Complex (1); Ramu, Cox's Bazar, Chittagong	XXXXAXXXTXGGXGTGXXXXAXXXXCAXCXXGXXAXAXTXCXTTTATGAXXAGXXGXXXXXAXXCXXXGXXXXXXGACTXXXXAACAXXXXXGXTXCXXGC
556567	Lama, Soroi Union, AKOTA Office; Lama, Bandarban, Chittagong	GGGTGGCGTXAACCTGCATCAGTAGCAGCTAGCCACGTCGCATXCATGAAGAAACGGAXCCTAAXGCCAACCCXAGACTTCTAAATAXCACCGCTACGAGX
556568	Lama, Soroi Union, AKOTA Office; Lama, Bandarban, Chittagong	AGGTAATGCXAACCCGCGTATTTGACACTTAGCTTCAATGCATANATACGAAGACGGAXATAAATGACNTCCCXNAAGTCATAGATGATATCGCTATAAGT
556570	Alikadam Upazila Health Complex; Alikadam, Bandarban, Chittagong	AATCGATATGAATGCGCAXAATTXXTXXTTAAXXTTGAXCAACXTAAGAGAGAACXGXXACAXGTGACGTAACXAAGCXTATAGXTGACACXGCTATAAGC
556571	Ramu Mukti Office; Ramu, Cox's Bazar, Chittagong	GGTCAGTGTGGATCCGTAAATTXGXTACXXAACCACXAXCXAXXCXAGAAAAGGCGGGXACTAACGCCGACXCXCGGXXTXXXXXCATXXXTXXTXXXAXT
556574	Alikadam Upazila Health Complex; Alikadam, Bandarban, Chittagong	AGGCAATGCXAACCTGCATAATXXXTGXTTAACXTTATCXXAXTTATGAAAGGACGTGXCCAAGTACTGTACCXAGAXXCCTXAXTAAXXTXAXTACGGXT
556575	Chittagong Medical College Hospital; Panchlaish, Chittagong, Chittagong	AGGCGATGCXGATGTGTATAATTAGCACTCTGTCACGACGATTXCGAGCAAAGACATGXXCTGACGACATCAGXAGGCCCXTXACTAXXXXXAXTTCXGXT
556577	Ramu Upazila Health Complex (1); Ramu, Cox's Bazar, Chittagong	GGTTGATACGGACCCGTGTCATTGACGCXTAGXCACAAXXXAXXTGAAAGAAGACXGXXXCTXACAACATCCCXCXGXXTXXXXXXXXXXTTXXTXTXGXT
556580	Lama, Soroi Union, AKOTA Office (2); Lama, Bandarban, Chittagong	GGTXAACATXGACGTCCATXATTGGCAGCCTACCATAATXATTXXXXXXXXXXXXXXXXXXXXXXXXXXXXXXXXAACCCAXAAATAXTACCGCTTCGXGT
556581	Chittagong Medical College Hospital; Panchlaish, Chittagong, Chittagong	AGGTGACGCGAGCCCGCGTCXGXXXCGXXXXACXTTGACXXACXCXTGCGGAAACXGXXXCTGACACTGXCCCXAXAXCTXXXGXCATXXXXXXTXCXGXT
556582	Ramu Upazila Health Complex (1); Ramu, Cox's Bazar, Chittagong	GGGCAACGTGGGTCCGTAXCAGTXXTXXXTXXCTATATCCXAXXTATGAAAAGACGTGXACAGGCGCTGTACGXAXGXXCCGXXCXAXXXTXXXTXXXGXT
556583	Belaichari Upazila Health Complex; Belaichhari, Rangamati, Chittagong	XGXXAATGTXAANGTGTNAXTTXAGXACCCTATNTXXTCXCATTTNAAAXXAGXXXGGXACXNGXGCCGXAXCXXGGCTTCXAGCCAXCXCCGTTTCGXXX
556584	Chittagong Medical College Hospital; Panchlaish, Chittagong, Chittagong	GGTCAACATXGACGTCCAXAATTGXCXXXXXACXATAAXXAXXXCAAGAAGGGGTGGGXXCAAATACTATCCCXAAACCCXGXAXTAATXXXXCTACGAGT
556585	Ramu Upazila Health Complex (1); Ramu, Cox's Bazar, Chittagong	AAGCGGCACGAATGTGCATCTGGXXTXCTTAGTXTTAACGAXXXTATXAAGAGGCGGGXACTAATACTGTCCCXAGACCTATXAXTGATCXTXCTTCAAAT
556586	Chittagong Medical College Hospital; Panchlaish, Chittagong, Chittagong	XGTCAATGCGAACXCCTGAXATXXXTGCCXTACCTTAACCAAXXTXTAAGGAGXCATXXXTXGATAACXXCACXXGXCXCCXXAXTATCCXTXTTACAXAX
556587	Ramu Upazila Health Complex (1); Ramu, Cox's Bazar, Chittagong	XGTCGGTGTXGGCGCCCATAXTTXXXACTTXXCXTCGAXCAAXXTXAGXXGGGXTGTAXXTXAGCACTGTCXCXXGGGCTCXCACCAXTCTTACXATGXGT
556592	Belaichari Upazila Health Complex; Belaichhari, Rangamati, Chittagong	GGGXAGTGCXAGTGTGTATXATTAGTAGCTAGTTTCATTXCATTTAAGCAAAGATAGAGACTGATACTGACACCAGGGTCAXCGATAXCACCATTTTGGAC
556593	Ramu Mukti Office; Ramu, Cox's Bazar, Chittagong	GGTCANNNTXAGTCCGTNTCAGTGXXACXTTGCXTXNTCCAXXXCAAGAGNAGACGGGXXXXAGCACNXTXACXAXGCXXCXXXXCGXXXTTAXAXXXXXX
556594	BRAC (BHP) -Jurai Chhari; Jurai Chhari, Rangamati, Chittagong	NNTXNNNNNXNNNNNGTNNXNXTNGTNNCNNANNNTNANXNATTNNNNNAANNANNGNXNNNGNCACCGNNACXNGNGNNNXNNNNAXNNNNNNNTCNGNN
556595	Ramu Mukti Office; Ramu, Cox's Bazar, Chittagong	AGTCGGTATXGATCTGCATAAGTGXTAXXTAGCXACATXXATXXTXTACAAAGACAGXXXCAXACGATGXCACXAGAXXTCGXGXCAXTXTXACTACAAGT
556596	Lama, Soroi Union, AKOTA Office; Lama, Bandarban, Chittagong	XXXNXXXXXGXXXXXXXXTXXTXXGXGCCXAXXCAXXACXNATXXXXXXXXXXXXXXXXXXXGXXXXXXXXXXXCXXXXXATXXXTAAXNXXXXATXXXXT
556597	Alikadam Upazila Health Complex; Alikadam, Bandarban, Chittagong	AGGCAATATXGACGCGTGTAAGTGXTACXXAGXCTTGACCAAXXTGTGCAGAGGCGGGXCCAGGTACCAAACCXAGACXTATCGXTGATCXTGXTACGAAC
556599	Bandarban Civil Surgeon Office; Bandarban Sadar, Bandarban, Chittagong	AGNXGGCANXGATGTGTATXAXGGNTGCCNTNTTATAACXNATTNATNNGAAGATATAXCTTAGCACNGNCACCNGGGCNAXAANTAXCXNCGNTXCAGAT
556600	Lama Upazila Health Complex; Lama, Bandarban, Chittagong	GGTXAGCGTXGGTCCGTATXAGTGGTGCCCAGCCACGACXCTCACXAACAAAAGCAGACACTGGTGCTATCCCTCGGGCTCXAAATAXCATTACTXCGGGT
556601	Lama, Soroi Union, AKOTA Office (2); Lama, Bandarban, Chittagong	AGGTAATGTXAATCTGTAAAAGTGATGXXXXGCCATAACXXTCXCAAGCAAAGACGGAXACTGACGCTGTCACXCXAGXTCXXXXTXTXXXXXXTXCXGXT
556603	Lama, Soroi Union, AKOTA Office (2); Lama, Bandarban, Chittagong	AATCAGTGTXGATCTGTATAATTAXTACXXAGXTTCAACXAAXXXATACGAGGACGGGXACAAATGCCGTCACXAAGXCTXGXGXXATXXTXXXTACGXAT
556604	Bandarban Civil Surgeon Office; Bandarban Sadar, Bandarban, Chittagong	XXXXXXXXXXXXXXXXXXXXAXXXGXGCXXTGXXTTXTXXAXXXTXXXAXGAXAXAXXXXXXXGXGXXGTXXXXXGAXXXCXXXXXGXXXXCXXXXCXXXX
556605	Lama, Soroi Union, AKOTA Office (2); Lama, Bandarban, Chittagong	AGGTAACGCGGATGTGXGXAAGTGXCAXXTAACXXTAAXXXAXATGXGCAGAGXXGGGXCCTGXCACTAXACCXAGAGXCCTXGXCAAXXTXAXTACAGGT
556606	Lama Upazila Health Complex; Lama, Bandarban, Chittagong	GGGXGACGTXAATCCGTGAXAGGAACAGCCTGTTTCAACXAACXTXAGCAAAGACGGAXACTAACGATAACCXCCGGCTTAXAGCCAXCACCACAXTAAAC
556609	Lama, Soroi Union, AKOTA Office (2); Lama, Bandarban, Chittagong	GXTTAXTATXAATCCGTXAAATGGXTGCTTAAXXXTAACCAXXXTATACGAAGGCGGAXACAGGCGCTGTCACXAGACXTCGXAXCAATXXXAXTACXAXT
556612	Lama, Soroi Union, AKOTA Office; Lama, Bandarban, Chittagong	GGXNAGTGCXAACGCGCXTAAGXGGXGGTCAGCCXNAXTGCATXTATAXGAXGACGGAXANAXXXGCTXACXCXXGACTTNTAGATNACATXACXTTGGAT
556613	Lama Upazila Health Complex; Lama, Bandarban, Chittagong	NAGXAGCGTXGATGTGTATXTTTGGTACNTAGTCTCATCXANTTNATGAAAAAGCGGAXATTGACGCTGTCACCCAGGTTCXAAATAXTCTCGCTXCGAGT
556614	Lama Upazila Health Complex; Lama, Bandarban, Chittagong	NGGXANTNNXNANNCGTNTXNGGGGTNGNTANNNNTNACXAATNTATNNNNNNATGNGCNTNNGNACTNTCNCCCNGCNTNXNAATAXCATCGCTXCAGNT
556615	Lama, Soroi Union, AKOTA Office (2); Lama, Bandarban, Chittagong	AAGTAGTATGAACCTCCATATTXGXTACTXXAXXTCATXXAXXXCGTGCGAGAACXTXXACXGGCGATATCXCXAXGGCTXXXXXCGXTXTXXXTACXGXT
556617	Lama, Soroi Union, AKOTA Office; Lama, Bandarban, Chittagong	GGNNAGNANXGACNNGNNANANNNGNGCCNNANNTCNNTNNATXTGTNANNNNNCNNAXACNAACNNTGTNCCXANNGXTNGAGACNATANCANTACNGGT
556618	Bandarban Civil Surgeon Office; Bandarban Sadar, Bandarban, Chittagong	AGGXAGTGTXAACGCCTGTXTXTAGTAGTCTACCTTGACXCATTCATGCGGAAACGGGXCTAGGCACTGTACCXAAGCTTAXAGATAXCACCATTXCGAGT
556619	Lama, Soroi Union, AKOTA Office; Lama, Bandarban, Chittagong	AGGCAGTATXGGTCCCCATAAGGXGCGCCCXGTCTCAXTGCATXCGTACGAAGACATGXXCTGACGATGTAACXCGGCTCCTAAACXTCATCATTATAAGT
556620	Lama, Soroi Union, AKOTA Office (2); Lama, Bandarban, Chittagong	GGGCGGTACXAACGCGTGTCATTGGCGXXXTGCTTTAAXXAXCACATGAAAAGACGGGXACTAATGCTGTAAGTAGACCCXGXXXCGXXXTTAXTACXGXT
556621	Lama, Soroi Union, AKOTA Office; Lama, Bandarban, Chittagong	ANTNGGTATXGATCTCTGTAAGTNGTACCCAGTCATAACGCATXCANNAANGGATGGGXXTAGGCACTGTCACXAGGCTCATAACTAATCCCGTTACGAAC
556622	Lama, Soroi Union, AKOTA Office (2); Lama, Bandarban, Chittagong	AGTTAATGTGAATGTGTGAAXTTXXCAXXXAGCTATGAXXAACXTATAAGGAGACAGGXACTAACACTGTAACXAGGGCCXGXXXCAXTXTXAXTATXAXC
556623	Bandarban Civil Surgeon Office; Bandarban Sadar, Bandarban, Chittagong	GAGXAGTATXNACNCCTATXNXTGGNANCCTATNANANCXCNTTTATGCAAAGNTGNAXACTGACAATNTNAGXAGGGTCNXAAATAXNCNCGCTATNXNC
556624	Sajek Brac Office; Baghai Chhari, Rangamati, Chittagong	XATXAACATXAATCTGTAAXTTGGGTGGCCTATCACGTCXCTTTTATGAGAAAACGGAXACTGACACTGACACXCGAGCCAXAAATGXTATTGCTXTGGAT
556625	Bandarban Civil Surgeon Office; Bandarban Sadar, Bandarban, Chittagong	AAGXGATATXGGCCCGTAAXAGTAGCAGTTAATTATGACXCTTTCATAAGGAGACGGAXACTAACAATGAAACCCGGGTTCXAAATAXCXTCATTXCGAGT
556626	Lama, Soroi Union, AKOTA Office; Lama, Bandarban, Chittagong	GNGNNGNANXNNCCNGNATAAGNNACNGCNAGNCACNNCGCTTXNATNNGAANACGGAXCNTANCGCCATCXCXAGANTCCNNNANAXCACCGNTACGAGT
556627	Sajek Brac Office; Baghai Chhari, Rangamati, Chittagong	GGTXAGTGTXGATCCGTGTXAXGAGCGGCCTGCTXTATTXCATATATGCAAGAATGTGXACAGAXGCTGTACCXCGGCTTAXAAACGXCATCGCTTCAGGT
556628	BRAC (BHP) -Jurai Chhari; Jurai Chhari, Rangamati, Chittagong	AGGXAATGTXGGCCTCTGTXAGTAACAGCTAGTCACATCXCTCXTATGCGAAAATGGGXACTAATGCTGTCCCCAGACCTAXAGATAXCACCGTTXCGGGT
556629	Sajek Brac Office; Baghai Chhari, Rangamati, Chittagong	AATXAACATXAATCTGTAAXTTGGGTGGCCTATCACGTCXCTTTTATGAGAAAACGGAXACTGACACTGACACCCGAGCCAXAAATGXTATTGCTTTGGAT
556630	Bandarban Civil Surgeon Office; Bandarban Sadar, Bandarban, Chittagong	GGTXAGTATXAATCTGTATXTXTGGTAGCTTGCCATGATXAATXXXXXXXXXXXXXXXXXXXXXXXXXXXXXXXXAGGTCAXAAATGXCACCATTXCGXGT
556631	Bandarban Civil Surgeon Office; Bandarban Sadar, Bandarban, Chittagong	GNNXAGCACXNATGCGTNTXAXGNGNNCCTNNTTNNAACXCTTATGAGCAGGGNCGGAXCTTGGCNCNGTCCCCAANNTCNXAAANGXCCCCATNXCGNGT
556632	Lama, Soroi Union, AKOTA Office (2); Lama, Bandarban, Chittagong	AGGCAATGTXAATGTGTAAAATTGXTGXXTTATCTTGACXXTCXCATGCGAAGACGGGXACAGACACTGAAACXAAAGXTCGXAXCGATCXTXCTTCXGAT
556634	Bandarban Civil Surgeon Office; Bandarban Sadar, Bandarban, Chittagong	GGTXAGTATXAATCTGTATXTXTGGTAGCTTGCCATGATXAATTTATACAGAGATGTAXXCTAGTACCGTCACCAAGGTCAXAAATGXCACCATTXCGAGT
556635	Lama Upazila Health Complex; Lama, Bandarban, Chittagong	AGTXGATGTXAACCTGCAAXATTGGCACCTTGTCTTAATXAACTTXTGAGGGGACGTGGACTGGTGCCGTAACCCGACTTAXCAACAXTACTGTTXCAGAT
556636	Farua Brac Office; Belaichhari, Rangamati, Chittagong	GGGXGGTATXGGTGCGTATXATTGGCACCTAGTCATGTCXCTTXCGAAAAGAGGCGGGXCTTAACACTGAAACCAAAGTTAXAGACXXTATCATTTTGAGT
556638	Lama, Soroi Union, AKOTA Office (2); Lama, Bandarban, Chittagong	GGGCGGTACXAACGCGTGTCATTGGCGGXCTGCTTTAATXAXCXCATGAAAAGACGGGXACTAATGCTGTAAGXAXACCXXGXXXCGXXXTTAXTXCXXXT
556640	BRAC (BHP) -Rajasthali; Rajasthali, Rangamati, Chittagong	AGTXAATATXAACCCGCAAXAGGGGTAGCTTACCTTATCXCTCTCAAAAGGAGATGGAXACAAGTACCGTACCXAGAGTTAXAAATAXTACCACTTTAAAT
556642	Bandarban Civil Surgeon Office; Bandarban Sadar, Bandarban, Chittagong	AGTXGGTNCXGANCNGTANXAGGNNCACNTNATNATAANXAATTTANNCGNAGANAGAXANTGGCNNNGACCCXCNNCNCNXAAANGXNATCGNTXCNAGT
556643	Sajek Brac Office; Baghai Chhari, Rangamati, Chittagong	GGTXGATATXAGXXCGTAAXATTXGCGGCTAGTCTTAACXCATTTAXGAGAGAATAGAXACTAACAXTGACCGXCGACTCCXAAATAXCACTGCTTXAGAT
556645	Bandarban Civil Surgeon Office; Bandarban Sadar, Bandarban, Chittagong	AAGXGATATXGGCCCGTAXXAGTAGCAGTTAATTATGACXCTTTCATAAGGAGACGGAXACTAACAATGAAACCCGGGTTCXAAATAXCATCATTXCGAGT
556646	Bandarban Civil Surgeon Office; Bandarban Sadar, Bandarban, Chittagong	AAGXGATATXGGCCCGTAAXAGTAGCAGTTAATTATGACXCTTTCATAAGGAGACGGAXACTAACAATGAAXCCCGGGTTCXAAATAXCATCATTXCGAGT
556647	Bandarban Civil Surgeon Office; Bandarban Sadar, Bandarban, Chittagong	AGGXAGTGCXAATGTGTATXAXXAGTAGTTTGTCTTATTXATTTTXAACAAAGGTAGGCCCTGGCGCTGAAAGXAGGGTCCXAAACAXCATCATTXTAXGT
556648	Lama, Soroi Union, AKOTA Office; Lama, Bandarban, Chittagong	GGTCAGCATXAACCTGTAAAAGTAGCGCCTTATCACAXTCCATXTATGAAGGAGTAGGXACAAAXACTATAACCAAGCTCAGCGACATTATTGCTACGGGT
556649	Sajek Brac Office; Baghai Chhari, Rangamati, Chittagong	GXTXGATATXAACGTGTATXATTGGTAGTTTGTCATAACXCATATATGAGGAGGTGTAXATAGACGATAAACCXAGAGCCAXAGACGXTATTGTTTCAGAT
556650	BRAC (BHP) -Jurai Chhari; Jurai Chhari, Rangamati, Chittagong	GGTXAGTGTXGGTGTGTAAXAGGGACAGCTTATCATGATXAATXTATGAGGGGACGGAXACTAAXACCGAACCXCGAGTCAXAGCCGXCATCGCTTTAXGT
556652	Farua Brac Office; Belaichhari, Rangamati, Chittagong	GAGXAACATXGGTCTNCNTXAGTGGTGGNNANTCTCATTXCATATGAGCGGAGACAGNGATTGGCGNTANANCNAGNGTCCXAGCCAXCNCCGCTTTNAAT
556654	Farua Brac Office; Belaichhari, Rangamati, Chittagong	GGGXANTANXNNTNCGTNTXNTTNGTGNNCNGTTACAACXNATTNANNNAAANGNGGGXACNAACAACNTCNCXNGGCNTAXAGNCGXNATNGCTTCNNNT
556655	BRAC (BHP) -Laxmichari; Lakshmichhari, Khagrachhari, Chittagong	AGTXNGTGTXAATGTGNNTXTGNAGTGNCTTNTCTCNTCXCNNTNATACANAANTGGGGACTANNGANANNNGXNGNNNTNXAANTNXNANNNNTTNAANT
556656	Sajek Brac Office; Baghai Chhari, Rangamati, Chittagong	NGGXANTANXGGNCNNNAAXATGGNCGGNCNGCNTCNATXCATACGNNCNGAGGNGGGGACTGGCGNTNNNNCXCGNNTTAXANNNGXCACCNNTTTNNNN
556658	Kubbang Brac Office; Barkal, Rangamati, Chittagong	AGGXAACGCXAGTGTGCAAXTGTGGTAGTTTGTCTCGACXAACXCAAGAGAAGACAGAXATTAAXGACATCACXAGGGTTAXAACTGXCATCACTTCGXAT
556659	BRAC (BHP) -Laxmichari; Lakshmichhari, Khagrachhari, Chittagong	AAGXGGTGTXAACCTGTAAXXTXAGXACCXTAXTTXXXCXCXTXCAAAAGGAAACATGXACTGACACCGTCCCXCAGGTCCXAAACAXCACCGCTTCGXAT
556660	Kubbang Brac Office; Barkal, Rangamati, Chittagong	GGGXANNNCXANCNTGNGTXTGTNNCNNCNNNCNNTGANXAATXTGNGAXAAAATNGNXACTGAXGCCNTACCXANNNNCNXANATAXNANNGNTTNAXNT
556662	Horina Brac Office; Barkal, Rangamati, Chittagong	GGGXGXTGNXNNCNNGTGTXTXTNNCNNNNNNCNNCNANXAATXNNNGNAAANANNGNXACTGNCNACGTNCCXANNNNCNXANANAXNANCNNTTNNXNN
556663	Farua Brac Office; Belaichhari, Rangamati, Chittagong	GATXAGNGTXGANNNGCAAXTGGGATGNCTAATNATAACXCATXCAAAAXNGGXCGGGGACANGCGCCGTCACCAGAGTCAXAGCCGXCACNACTTCGXAT
556667	Lama, Soroi Union, AKOTA Office (2); Lama, Bandarban, Chittagong	GGGCGGXACGAACGCGTGTCATTGXCGXXXXGCTTTAAXXAXCXCAXGAAAAGACXGGXACTAATGXXGTAAGXAGACCCCGXXXCGXXXTTAXTXXXGXT
556669	Horina Brac Office; Barkal, Rangamati, Chittagong	XAGXGXTXCXAXCGXXXXTXXTTGATGGCCTGTNACAXXXNTTXXGXGXGAXGACAXGXXXAGAXACTAXAAXXAGAXTCCXAAATXXCAXCATTTNAXXT
556671	BRAC (BHP) -Laxmichari; Lakshmichhari, Khagrachhari, Chittagong	GAGXGATGTXGACGCGCATXATTGGTAGCTTGTTTTAATXAATXTAAGCXGAAGCATAXACTGATACCATACCXAGGGCTAXAAATAXTACTGCTTTAGAT
556674	BRAC (BHP) -Rajasthali; Rajasthali, Rangamati, Chittagong	GGGXAGTGTXAGTGCGTXAXTGTGGTAGCTTGTCTTGTCXCATTCATGAGAAGATGGAXACTAGCACCATCCGXCAGGTTAXAACTAXTACCGXTTTGAXT
556676	Fakirachara Brac Office; Jurai Chhari, Rangamati, Chittagong	GGTXAACATXGATCCCTATXATGAGTGCCTTGTTTTGTTXCTTTTATAAGGAAATAGGGACAGGCAXTGAACCCAGGCTTCXAAAXAXTACCACTTCGAGT
556677	BRAC (BHP) -Rajasthali; Rajasthali, Rangamati, Chittagong	GGTXNGTNNXNNNNCGTNTXTGTAGTNGCNNGTNNCGNCXCNTXNATAANNNNNNNGAXACTGACACTAACCCXCAAGTNAXAACTAXNNCCGTTTCNXNT
556678	BRAC (BHP) -Rajasthali; Rajasthali, Rangamati, Chittagong	AGTXAATATXAACCCXCAAXAXGGGTAGCTTACCTTATCXCTCTCAAAAGGAGATGGAXACAAGTACCGTACCXAGAGTTAXAAATAXTACCACTTTAAAT
556680	BRAC (BHP) -Rajasthali; Rajasthali, Rangamati, Chittagong	AGNXGANGTXGACNNNTATXATNNGNANTNNACNATAANXAANXNANGCGNANNNNGGXCCNAGCNCNATNCGXAGNGTNCXNAACAXCANNGCTTCAAAT
556684	Farua Brac Office; Belaichhari, Rangamati, Chittagong	GGGXGGTNTXGGTNCGTATXAGTGGCNCNTNGTCATGNCXCTTTCGANAAGAGGCGGGGCTTAATANTGANACCAAAGTTAXAGACAXTATCNNTTTNANT
556685	Fakirachara Brac Office; Jurai Chhari, Rangamati, Chittagong	GGGXGGCXTXGXCCTXCGXXATGAGXGCCTAGCCAXGTCXAATTTATGXAAGGACGXAXAXTXGCACCXTCACXCGGGTTAXXAACAXTXCCGCTTTXGAT
556687	Lama, Soroi Union, AKOTA Office; Lama, Bandarban, Chittagong	AGGCAATGTXGGCCCCCATAAGGAGTGCCCAATCTCGACGCATXCGAACAGAAATATAGACTGATAATGTAACXAGGCTTCTAACCGACATCATTATAAGT
556689	Sajek Brac Office; Baghai Chhari, Rangamati, Chittagong	AGGXAACGTXAATCCCCATXTTTAACGGCTTATCACGTCXAATXCATGAGGAAGCAGAXACTAGTGCCGTCCCXCGGCTTAXAGACAXCACCGCTTTAGAT
556690	Ramu Mukti Office; Ramu, Cox's Bazar, Chittagong	GGGTAATACXGATGCGCAAAATGGXXAXTTXGXXTTAACXXAXXCXAAAAAXAACAGXXACTGATAACGTCXGXXAACCTXGXXXCXAXCTTAXTXTXAXT
556691	BRAC (BHP) -Dighinala; Dighinala, Khagrachhari, Chittagong	AGGCAACGTXGGCGCCCGXAAGGGXTGCXTAGXXTTAAXCAAXXTAAAAGAAAACAGAXACTAGCACTATCAGXCAACXTCTXACTAAXXTXAXTACGGXT
556692	Ramu Mukti Office; Ramu, Cox's Bazar, Chittagong	XGGTAACGXXAACCCXCATAAGXGGXGCCTTAXCACAAXCAATXCGTAXXAAGXTAGXXXTXXACGCCGACXCXXAXCTCCTXGCCAXTAXXATTAXGXGT
556693	Ramu Upazila Health Complex (1); Ramu, Cox's Bazar, Chittagong	AGGTAGTGTXAATGCGCATAATTXXTAXTTAGCXATAACXXAXXTGTGAGAAGGCNGGXACAGANGCCNAACGXXXAXXTXXXXXTATTXXXAXTATXAXT
556695	BRAC (BHP) -Dighinala; Dighinala, Khagrachhari, Chittagong	AGGCAACGTGGGCGCCCGXAAGGGXTGCCTAGTXTTAAXCAAXXXXAAAGAAAACAXXXACTAGCACTAXCXGXCAACXTCXXACXAATXTXAXTACGGXT
556697	Lama Gozalia BRAC Office (2); Lama, Bandarban, Chittagong	GGTXAGCATXNACNCGTNTXAGTANNGGNNTGNCNTATCXCNTTTANGCGGGGANAGAXACTANCACNNTCACCAAGGCCNXAGCNGXCACNGCTXTNAGT
556698	Ramu Upazila Health Complex (1); Ramu, Cox's Bazar, Chittagong	GGTTANNGNGAANCTGNAXNXNNGXCGXTTAGCXNNNNCXAAXXCGTNAAGAAACGGAXCNTAANNNCAACNCXAGACCNCGXXCNAACAXXGXTANGAGT
556699	Naikhongchhari, Baishari BRAC office; Naikhongchhari, Bandarban, Chittagong	GGGTAGTGTXGATCCGTAAATTTGGCAGTTAGTCTTAACCCTCXCAAAAGAGGGCAGGXACTGACGACGTCAGXAAGGTTCTAAACATCATTACAACAAAT
556700	Ramu Upazila Health Complex (1); Ramu, Cox's Bazar, Chittagong	GGGCAGTACXGACCCCCGXCAGTXXCAXTXXGXXATGAXCAAXXXAAGCGAAGATAGXXACTGGCAATGACAGXCXGXXXXXXXCCGXXXXXXXTXTXXXT
556701	Lama, Soroi Union, AKOTA Office; Lama, Bandarban, Chittagong	GGGCAATGCGGGTCCGCATCAGTXATGCXTAGXTATAAXXXAXXCATGCGAAGATGGAXACTGACACTGACACXCXAXXTXGXXXCXAXXXXXXTXXXXXT
556704	Chittagong Medical College Hospital; Panchlaish, Chittagong, Chittagong	GGTCGGCATXAATCTGTAAAATGXXCGXXTAGCXATGACXAAXXTXAACGAGGGCXGGXACTAGTAATXXCXGXAXACXTCGCXCXXATCXXAXTACXGXT
556706	BRAC (BHP) -Dighinala; Dighinala, Khagrachhari, Chittagong	AGTTGGCGTXAACGCGTGXAATTGXTXXXXAACXACGAXXXAXXCXTAAGAAGACXGXXCCAXACAATGTCACXAGGCXCATXAXTATTAXTACTATAGAT
556707	Lama Gozalia BRAC Office (2); Lama, Bandarban, Chittagong	AGGXGGTGTXGATCTCTGTXTTGGGTAGTCTATCACAATXCTTATXAAAGGAGGCGTGXACAGACGACGTCCCXCGGGTCAXAXACAXXCTTGCTXCAAGT
556708	Ramu Upazila Health Complex (1); Ramu, Cox's Bazar, Chittagong	GNNTANTANXNNNGTGTNAAATTXATACXTAAXXTTANCXAAXXTANGCAGAGANGGAXCNTAACNCTNACCGXAGGXCTATXGCXNAXXTTXCTANXAXT
556709	Lama Gozalia BRAC Office (2); Lama, Bandarban, Chittagong	AGTXAANGTXGATGCGCATXAXGAACGNTCTGTCNCAACXCTTTTGNAAAAGAANNNGCACTAGCGCTGNCCCCNGNCTTNXANCCAXNNCNANTXNNGGT
556711	Ramu Upazila Health Complex (1); Ramu, Cox's Bazar, Chittagong	AGGTAACXCXGATGTGCGAAAGTGGCAGCTAGCCATAATGCATATGTGCAGAXGTXGGXCCTGGCACTATACCXAGAGTCAXAGACAXCATCACTACAGGT
556713	BRAC (BHP) -Dighinala; Dighinala, Khagrachhari, Chittagong	AATTAATATXGACCTGTATATGXXXTGCXXXGXXACXAXXXAXXXXAACAGXGACAGXXXCTAACGCCAXCXCXCAAGXTAGXGXTGATXTXACTATGGGT
556714	BRAC (BHP) -Dighinala; Dighinala, Khagrachhari, Chittagong	GGGTGACGTXGACCTGTGXAATXXXTGCXXAGXXTTGTCXAXXXCGTGAAAAGATXGXXACTXACGCCGTCXCXXXGXXTCTCAXCGXXXXXXXTACXAXT
556715	Naikhongchhari, Baishari BRAC office; Naikhongchhari, Bandarban, Chittagong	AGGCAATATXGACGCGCAAATGTAGCGGCCAACCTTAACCCATXTAAGAAAAAACGTGXATAGATAACGTCACXAAACCCCTCGACGACAXCACTATAAGC
556716	Chittagong Medical College Hospital; Panchlaish, Chittagong, Chittagong	AGTTAAXGTGGGTXCGXGXAATTXXCXXXTAACXACATCCAACXCATXAAGAXATXGGXACTAGCAATGTCCCXAXXXCXCXXXXCXAXXXXXXTXTXXXT
556717	BRAC (BHP) -Dighinala; Dighinala, Khagrachhari, Chittagong	AGGCAGTGTXGACGCCCAAATTTXXCGXXXAACTACGTCCATXXCXAGCXAGGATAGXXATTXACACTGTCCCXCXACXXXXXXCCXTXXTXXXTXTXGXT
556718	Chittagong Medical College Hospital; Panchlaish, Chittagong, Chittagong	GAGTAGTATGGACCCXTATCATTGXTGXXTXAXTTCAACXXAXXTXTGCGAGGACATGXACTGACACCATCCCXXAACCCATXXXCAATXXTXXTACXGXT
556719	Naikhongchhari, Baishari BRAC office; Naikhongchhari, Bandarban, Chittagong	AGTCAAXGTXGACCCGCATAATGAGCAGCTTATCTTGTCGCATXCATAAGAGGATGGAXATAAGCACCATCCCXAGGGTCCTAGACGATCTCGCTACGAAT
556720	Dulyatali BRAC Office; Lakshmichhari, Khagrachhari, Chittagong	NGTXGATNTXGATNNNTAAXATTGGNNNCCNGNCATGTTXATTTTNTGNNANGNTNNAXANTNGCACTGTNCNXCGANNTAXAGANNXCNNNACTTCGGNT
556721	BRAC (BHP) -Dighinala; Dighinala, Khagrachhari, Chittagong	AGTTAGTATGGGTGCCTAAAXTGAXTACTXAGCCATATCXAAXXXGAACGGAGACXXXXACTXGTACTGXCACXAAGGXTCXXXXCGATXXXAXTATXAXT
556722	Lama Upazila Health Complex; Lama, Bandarban, Chittagong	AAGXAGCATXAACCCGTATXAGTGATACCCAACTTCGATXCTTTCXAGAAAAGATAGGGACTGGCGCTGACACCCGAGCCAXAAACAXTATTGCTXTGAAT
556723	Lama Upazila Health Complex; Lama, Bandarban, Chittagong	GGTXAACGTXGATGCGCAXXXXXAAXXGTTXAXCXXAXCXAAXXTGTAAAAGAACATGGACTAGTGCCGACCCXCGGGTTAXAAACAXCACCGTTXCAGGT
556724	BRAC (BHP) -Dighinala; Dighinala, Khagrachhari, Chittagong	GGGTAATGTXGATCTCTAAAAGTXXTACTTXACXATGAXXAAXXCGTACGGAGGTAXXXXCTAGTACCAXAXGXAXAXCTCXXXXCATTXTXAXTXCXGAT
556726	BRAC (BHP) -Dighinala; Dighinala, Khagrachhari, Chittagong	GGTTANNGTGGGTNCNNATNANNGXTGCCTNANCTNNTCCAACXCANGAAAAGACAGAXANNGACNCNNXAXCXAXACCTNGXAXTATTATXAXNATAGGT
556727	Ramu Mukti Office; Ramu, Cox's Bazar, Chittagong	GGGCANNGTGGATCTGTNXCATTXXTAXXXAACXTNAAXXXXXXTANAAAAAAATGXAXACTGACNCTAXAACXCAGGXTCTCXXTAXCCCXGCTACXGAT
556728	Ramu Upazila Health Complex (1); Ramu, Cox's Bazar, Chittagong	AGTTAGTACXAGTCCGTAACAGTGGCACTCTGTCTCATCCCTTXTAAGCAAAGATGGAXACTAGCGCTGAAACTCAGGTTCXAGCCGXCCCTACTACGAGT
556729	Lama Gozalia BRAC Office (2); Lama, Bandarban, Chittagong	AGGXGATATXAACGCGTATXAGTGGTAGCCTACTACAATXCATTTATGAGGGGGTGGACATAAGCAACGTAACCAGAGTCCXAGATAXCXTTACTXTAAGT
556730	Lama Gozalia BRAC Office (2); Lama, Bandarban, Chittagong	GGTXAACGXXGATGCGCATXAGTAACGGTTTGTCTCAACXCATTTXTAAXAGXACATXXACTXGTGXCGACXXCCGGGTTAXAAACAXCACCGTTXCAGGT
556731	Lama Upazila Health Complex; Lama, Bandarban, Chittagong	GXGXGGCGTXAACCTGCAXXXXXXXXXXCXXXXCXXXXXXXXXTCXTGCAGAAAXGGAXCCTAACGCCAACCXXAGACTTCXAAATAXCACCXCTXCXAGT
556732	BRAC (BHP) -Dighinala; Dighinala, Khagrachhari, Chittagong	GGGCAACGTXGATGCCTGTCAGTGXTAXXTXGCXACATXXXTXXCXAAAGGAGACXGAXATAXATACCGTCCCXCGGGCTCGXAXTAAXCXXACTACAAGT
556733	Chittagong Medical College Hospital; Panchlaish, Chittagong, Chittagong	AANCAGNNCXGACCCGCNTAANTGXTGCCTAATXTNAAXNAACXCAANNNAAGACGGAXXTTNNCAATAXANNXNXACXCCTXGXCATCCTTGXTATXXXT
556735	BRAC (BHP) -Laxmichari; Lakshmichhari, Khagrachhari, Chittagong	NGTXGNCGTXNANGCGNNAXAGTNGTGNCCAGCTTTNACXNATANANGAANAGGCGGNXACAAGCGNCNTNCGXCAAGCCAXAANCAXNATCGCTTCAAAT
556736	Chittagong Medical College Hospital; Panchlaish, Chittagong, Chittagong	AGNTAACATXGACGCNTAXAATXGXXACTTAACXNTGAXXXACXTAAAAGAAGANAGAXXCNGACAATNTAACXCAGGXTXXXAXCGTTXXXXXNATAXAT
556737	Ramu Mukti Office; Ramu, Cox's Bazar, Chittagong	AATTAATATXAATCCGTAXAAGTGXCAXXTAAXTATGTCCXTXXTATGCGAAGATXTXXACTGGTGCCGXACCXXAAXXTXXXXCCGAXXTXAXTTTXGXT
556739	Ramu Mukti Office; Ramu, Cox's Bazar, Chittagong	AGGCGGTGTGAATGTGTAXAXGGGXTXCTTXGCXTTATCXXXXXCATAAAAAGATXGXXCTTAACACCAXCCCXCAGCXTCTXACCAAXCTXACTATGXAT
556741	Ramu Mukti Office; Ramu, Cox's Bazar, Chittagong	GGXXAATGXXGATGCGTATXAGTGATAXTTXGXCATAACCATXXTGXGXAAXGATAGAXACTXXTACXGTCCGXCXGCCTXXXXXTAAXCXXXXTXTXGXX
556742	BRAC (BHP) -Dighinala; Dighinala, Khagrachhari, Chittagong	GGTTAGTGTGGATCTCTAAAAGGGXTGXXXAGXCTCAAXXAAXXTATGCAAAGACAGAXACTXGCACTGTCACXCGGXCCXTXAXCGATXTXACTTTXAXT
556743	BRAC (BHP) -Laxmichari; Lakshmichhari, Khagrachhari, Chittagong	AGNXNNTGTXAATGTGTNTXTGGAGTGGCTTGTCACGTCXCATXTATANAAAAATGGGXACTAGCANCANAAGXNGANCTCXAACTAXTATTNCTTTAXNT
556744	Ramu Upazila Health Complex (1); Ramu, Cox's Bazar, Chittagong	AGNTAATGTXGATCTCTNAAANNGXXACXXXAXTNTGXCCAXXXXXNGAAGAAACXGXXACTAAXACNGXCXXXXAGXCXXGXXXCAAXCTTAXTACXGXT
556746	Ramu Upazila Health Complex (1); Ramu, Cox's Bazar, Chittagong	GAGCAGTGCXGACGCGTAAAAGGGXCAXXTTGXCTCATXXXAXTTATAAAGGGACATGXATTXGCGACATCACXAXGXCCXGXXXXGAXXXXXXTXTXGXT
556747	Lama, Soroi Union, AKOTA Office; Lama, Bandarban, Chittagong	GGGCAGCATGGGTCCGCGACATGXXCGCXXXACXTCGAXCXAXXXXTACAGAGACXGXXACTXATACTGTACCXCXXXCTXGXXXXXAXXXXXXTXTXXXT
556751	BRAC (BHP) -Dighinala; Dighinala, Khagrachhari, Chittagong	AGGTGATGTXGGCCTGTGTAAGTGXCAXTTAACXTTAACXAAXXTAAGCAGAGGTAGGXATAAGCACCATAACXAXGGCCCGXXXCGATXXTXXAACXGAT
556752	Ramu Upazila Health Complex (1); Ramu, Cox's Bazar, Chittagong	GGGTAACGCXGATCCGTGAATGGGGTACCCTGTTTTGACCCATXTAAACAAGGATAGGXACAAACAACGXCACXCAAGTTAXAGACAACACCACTATAXGT
556754	BRAC (BHP) -Dighinala; Dighinala, Khagrachhari, Chittagong	GATCGACATXGATCTGCAAATGTGACGXCCAACTATATXGXAXXCXTAAGGAGATAGXXXTAXATACCAXAAGXAGACXTCTXGXCAXXXTXAXTATXAXT
556755	BRAC (BHP) -Dighinala; Dighinala, Khagrachhari, Chittagong	AGGCAACGTXGGCGCCCGAAAGGGXTGCXTAGXXTTAAXCAAXXTXAAAGAAAACAGAXACTAGCACTAXCAGXCXACXXCXXXCTXATXTXAXTACXGXT
556758	BRAC (BHP) -Lama; Lama , Bandarban, Chittagong	GGTXAGCGTXGGTCCGTATXAGXGGTGCCCAGCCACGACXCTCTCAAACAXAAXCAGACACTGGTGCTATCCCXCGGGCTCXAAATAXCATTACTTCGXGT
556759	Chittagong Medical College Hospital; Panchlaish, Chittagong, Chittagong	GGGXGGTGNXGATGTCNATXATTAGCNCCNAATTTTNNCXNNTTCAANCAGAAACGGGXACXNGXGCTNTCACCANGCNNCXCAACGXCATCGCTTCAAGC
556760	BRAC (BHP) -Dighinala; Dighinala, Khagrachhari, Chittagong	AGTCAGCGTXGGCCTGCATCTTTXXCGCXTXGTTACAACXXACXTGAACAAAGATGGAXACTGATGCCGTCACXAGGCXCXTXACTATTXTXAXTATXAAT
556761	Chittagong Medical College Hospital; Panchlaish, Chittagong, Chittagong	AGGCAATATXGGCGCGCATAATXGATAXXTAGXCTTAAXXAAXXTXTACXGGGATAGGXACTAACACCGTCCCXAXAXXXXGXXXCXXTXXTXXTXTXXXT
556762	BRAC (BHP) -Laxmichari; Lakshmichhari, Khagrachhari, Chittagong	GANXGNTGTXANTGCGNAAXAGTAGTACNTAATCACATCXAATTCATACAAAGACAGAXANTGGCGCTGTCACTCAGCTNAXAACCAXCACCACTTNGAGT
556765	Ramu Upazila Health Complex (1); Ramu, Cox's Bazar, Chittagong	GGTTAATATXAACGTGCGTAATGGATGGCCAGTCACAACCCATXTATGAGGAGACGGGXCTTGGCACCATAACXAAGCTCATAGACATCACCACTATGGAT
556768	Lama, Soroi Union, AKOTA Office; Lama, Bandarban, Chittagong	GAGCAGTATXGACCTCTATAATTGACACXTXGCTTCGTCXAAXXTXTGAGGAGACXGXXATTXGCGCTGTCCCXAXAXXCXTXXXCATTXXXXXTTCGAXT
556769	Lama Upazila Health Complex; Lama, Bandarban, Chittagong	GGTXAACGTXGATGCGCATXAGXAACGGTTTGTCTCXACXCATXTGTAAAAGAACATGGACTAGTGCCGACCCCCGGGTTAXAAACAXCACCGTTXCAGGT
556770	Dulyatali BRAC Office; Lakshmichhari, Khagrachhari, Chittagong	AGNXGATNTXGATNCNTAAXTTTGGNNNCNNGNCATNNTXATTTTNTGAAANGGTGNAXACTNGCANTNTNAGXCGANNNAXAGATAXCANTACTTCGGAT
556771	Lama, Soroi Union, AKOTA Office; Lama, Bandarban, Chittagong	GATCAATGTGAACCTGTGTAXGGXXCGXXXXAXTACAACXXAXXCXTGAGGAAGCXGXXACTAACACTGXAACXAXGXXXXXXXXXGTXXXXXXTXTXAXT
556772	Dulyatali BRAC Office; Lakshmichhari, Khagrachhari, Chittagong	AGTXAATGCXGATCTCTAAXATTAGCGGCCTATTATAACXATTTCATACGAAGGCAGGGACAAACGCTGTAACCAGAGTCAXAGCTAXCCCCACTTCGAGT
556773	Lama, Soroi Union, AKOTA Office; Lama, Bandarban, Chittagong	GGTCAATGXXGATCTGTGXCAGTXXCGXXTAGXTTTGAXXATXXTXTGAAGAGATATXXACTGACAACGACACXAXACXCXXCXXTATXXXXXXAXXXAXT
556774	BRAC (BHP) -Lama; Lama , Bandarban, Chittagong	AGGXAATGTXGATCCGCAAXAGTGGTAGCCTGTCACATCXAATTCGTGAAAAGGTGTGGACAGGCACCATCACCCGGGTCAXAGATAXCATCGCTTTGGAT
556775	BRAC (BHP) -Lama; Lama , Bandarban, Chittagong	AATXAGTACXGATCCGTAAXATTGGCACCCTACCACGTCXCACXTAAGAAAGGACGTGGCCTAGTACTATCACXAGGCTTAXAGACAXCATTACTTCAAAT
556779	Lama Upazila Health Complex; Lama, Bandarban, Chittagong	AGTXNGNNTXGATCCGNANXAGNAGTANCTAGNCTCGACXCTTTNXANCAGGANCGTAGAXTGGCACTANACGCANANTCNXNAATAXCATTGCTXCGGAC
556783	Alikadam Upazila Health Complex; Alikadam, Bandarban, Chittagong	AAGXAATGTXGATCTGXATXAGTGGCAGTTAATTTTATCXCTCXCAAGAAGAGGCGTAXACTAAXGCTATCACXAGGGTCCXAAATGXCATTGCAXCGXGT
556784	BRAC (BHP) -Dighinala; Dighinala, Khagrachhari, Chittagong	AAGTAGCATXAACCTGTATCAGGGXTGCXXXAXXTTAACXAAXXTXTGAAAAGACAGXXXCTAACGATAXCCCXXGGCTTCTAGATAACACTGCAACGAGT
556785	Lama Gozalia BRAC Office (2); Lama, Bandarban, Chittagong	XATXAACACXGATCTGCATXAXTGGTACCTAGTCATATCXCATTCXTGAAGAGGXGGGGACTGGTACCGTCACCCGGGTTCXCAACGXTACCGCTXCGAGT
556787	Lama Upazila Health Complex; Lama, Bandarban, Chittagong	GGTXAGCGTXGGTCCGTATXAGTGGTGCCCAGCCACGACXCTCACXAXCAAAAGCAGACACTGGTGCTATCCCTCGGGCTCXAAATAXCATTACTXCGGGT
556788	Farua Brac Office; Belaichhari, Rangamati, Chittagong	GGTXGGCGTXAATCCGTAAXAGGAGTGCCTTACCACATCXCTTTTATACGGAGGTATXXACTAACGACAAACGXCAAGTTAXCACCGXCACCGTTXCAGAT
556789	BRAC (BHP) -Laxmichari; Lakshmichhari, Khagrachhari, Chittagong	GAGXAATATXGACGCGTGTXATGGGTGGCTTATCACGACXCATTTAAAAGGAAACGGAGACTGGCGACATAACXAGGGTTCXAGCTAXTCCCATTTCAAAT
556790	BRAC (BHP) -Dighinala; Dighinala, Khagrachhari, Chittagong	AGTTAATATXGATGTGCATAAGTAXTGXXXXAXCTTATXXXAXXXXAGCGAAGACXXXXACTXACGATGTAACXAXGCXTXTXXXCAXXXXTXXTATXAXT
556791	Lama, Soroi Union, AKOTA Office; Lama, Bandarban, Chittagong	AGGXAGTATXGGTCTGCATXANTNGCACCTTACCACANCXCACXTXAACAGGAGXAGAXCCTGGCGCTAANACXAGAGTTCXCAACAXCCTCNNTXCGGGT
556792	BRAC (BHP) -Lama; Lama , Bandarban, Chittagong	GGTXAGCGTXGGTCCGTATXAGTGGTGCCCAGCCACGACXCTCACAAACAAAAGCAGACACTGGTGCTATCCCTCGGGCTCXAAATAXCATTACTTCGGGT
556793	Ramu Upazila Health Complex (1); Ramu, Cox's Bazar, Chittagong	AGGCGGTGCXGATCTGTAAAATTXXCACTXXGXXTCGTCXAXXXTXAGAGGAAATATGXACTGGTGACATCXGXAAGCCCXTXAXTGTXCXXACTATAGGT
556794	Lama, Soroi Union, AKOTA Office; Lama, Bandarban, Chittagong	GGTCGXTGTXGACGTGCAAAAGGGXCGXXTXGXXTCAAXCATXXTGTACGAAGATGTAXATAXGCGAXATCXCXCXGXXXCXXAXTGXTCTXXXAXXXXXT
556795	Farua Brac Office; Belaichhari, Rangamati, Chittagong	AGGXAATGTXAGCCTGTGAXAGGGGCGGCCTGTTTTAACXCATTTAAGAGGAGGTAGAGACAGACGCTGACCCTAGAGTCAXAGATGXTCTCACTTCGAGT
556797	Lama, Soroi Union, AKOTA Office; Lama, Bandarban, Chittagong	AGXXAACGTXGATCXCCGTXXXXGGTACCTXAXCTTGACXCATTTXTXXXXGGATGGGXAXTGACACTGTCACXXGGGTTCXAXCTXXCATCACTXTAXGT
556798	Lama Upazila Health Complex; Lama, Bandarban, Chittagong	AGTXGATGTXAACCTGCAAXATTGGCACCTTGTCTTAATXAACTTATGAGGGGACGTGGACTGGTGCCXTAACCCGACTTAXCAACAXTACTGTTXCAGAT
556799	Dulyatali BRAC Office; Lakshmichhari, Khagrachhari, Chittagong	ANTXGANGTXAACGCGCNAXAGTGGTGCCCAGCNTTGACXCATATAAGAANAGGCGGGXANAAGCGCCGTCCNXCAAGCCNXAAACAXNATCGCTTCNAAT
556800	Chittagong Medical College Hospital; Panchlaish, Chittagong, Chittagong	GAGCAGTGTXAGCGTGTAXAATXXXTGXXXAACXTCGTCXXAXXCXAGAAAAGACAGAXXCAXACACTGACXCXAAGCXCATXXXCGXXAXTXXTACGGGT
556801	Lama, Soroi Union, AKOTA Office; Lama, Bandarban, Chittagong	GATTAGCGTGGACCCGTATCATXGXCGCXXXACTATATCXAAXXCAAGAGAAGACATAXACTGGTGCTGTCCGXCXGXXXCXCXXXXTXXTTXXTXXXAXT
556802	BRAC (BHP) -Dighinala; Dighinala, Khagrachhari, Chittagong	AATTGGCXCGAGTGTCCGTAATTGXTGCXTAGCTACATCCXTXTCGTAAAGAGACATAXCCTAGTGCTGTACCXAGGGTTCTXGACAACATXGCTACGGAT
556803	Dulyatali BRAC Office; Lakshmichhari, Khagrachhari, Chittagong	GANXGACATXGACGNGNAAXTGTGGTANCTTATTTTATTXCTTTTATAAGNAGACAGAXCCTAACNCNGTCCCXAGGCTTAXANATNXCACCGTTTCGGAT
556804	Lama Gozalia BRAC Office (2); Lama, Bandarban, Chittagong	ANTXANNGTXGACGCCTGTXAXTGGCGNCTTATCANNANXCNTTNATNCGAAGACGGAGACTAATAACGTCCCTAGNCNTAXANACAXNANNACTXTAGAT
556807	Farua Brac Office; Belaichhari, Rangamati, Chittagong	AATXAGCGTXGGTGTGTGTXATTAATAGCCTGCCTTATCXCATTTGTAAAAGGGTAGAGACTGGCGCTGACACTAGGCCTCXAAACAXCCCCATTTTGGGT
556808	BRAC (BHP) -Dighinala; Dighinala, Khagrachhari, Chittagong	GXGCAGTATXGATGTGTATAXGTGAXGCXXXACCACGTCXXAXXTAAXXXAAAXCXGXXACAAAXXCTGXCACXAXAXXTCXXXXCGAXCTXAXTAXXAXT
556809	BRAC (BHP) -Dighinala; Dighinala, Khagrachhari, Chittagong	AGGTAGTGCXGATCCGTGACTTGAATAXXXTGXXACAACXAAXXTAAGCGGAGACGGGXATTAGCGCTATCAGXCXGCXCXXXXXCXAXXTXXXTXXXGXT
556810	Ramu Mukti Office; Ramu, Cox's Bazar, Chittagong	GANXAANNNXAGNNCGTNTXAXGGACGGCNTNTNNNANNXXNCTNANNCAAAGNNNGAXANTNNCAANGTNACNNAAXTNNXANACNXNCNCGNTXNAGNT
556811	Lama Gozalia BRAC Office (2); Lama, Bandarban, Chittagong	AGGXGGTGTXGATCTCTGTXTXGGGTAGTCTATCACAATXCTTATAAAAGGAGGCGTGXACAGACGACGTCCCTCGGGTCAXAAACAXCCTTGCTXCAAGT
556813	Chittagong Medical College Hospital; Panchlaish, Chittagong, Chittagong	GGGCAGCGTXAATCTCTAACTGXAGTGCXCAGXCATGTCCAAXXCAAGAAGAGATAGGXACTAATGCCGTCACXCGGGCCXTXAXXATXXTTAXTACAGXT
556814	Lama, Soroi Union, AKOTA Office; Lama, Bandarban, Chittagong	AGGCAATGTXAATGTGTAAAATTGXTGXXTTATXTTGACXXTCXCATGCGAAGACXGXXACAGACACTGXAACXAXXXXXCGXXXCGATCXTXXTXXXXXT
556815	Ramu Mukti Office; Ramu, Cox's Bazar, Chittagong	GGTXXGTGTXAGTCCGTAXXAXTAACXCCCTGTCACGACXXAXTCATACAGAGACGGGGACTGATACTATCAGCAAGGTTAXCGACAXTXCCACTXCGGGT
556816	Lama Upazila Health Complex; Lama, Bandarban, Chittagong	GGTXANNGTXGANCTGCNAXAGTNGCNNCTTANNTCAANXANTATGTNCAAAGANNGAXACNGNNNATGACCCXAGGGTCAXAAACGXCATTNTNXTAGNT
556818	Lama, Soroi Union, AKOTA Office; Lama, Bandarban, Chittagong	GGTTAATGTXGACCTGTGTAATTGXXGCXXAAXXATGTXCXAXXCGTGCGGAGGTGGGXXCAAACAACGTCCCXCXGXXTCXXXXCGAXXTXXXTXTXGXT
556819	Lama, Soroi Union, AKOTA Office; Lama, Bandarban, Chittagong	GGTTAGTGTXAACCCCTGTAATTGGCAXXTXGCCATAACCXAXXXXTAAGGXGATXGXXATAXACGCTGXCCCXAXGGXCXGXXXCXTXXXXXXTACXAXT
556820	Lama, Soroi Union, AKOTA Office; Lama, Bandarban, Chittagong	GGTCAGCGTXGATCTCCGXAAGGXXCGCXXXACXTTAAXCAAXTTGTAAAAAXACAGAXACTGACGATGAXCCXAXGXXCXGXXXCGXXXXTAXTXTXXXT
556821	Lama Upazila Health Complex; Lama, Bandarban, Chittagong	GGTXAGCGTXGGTCCGTATXAGXGGTGCCCAGCCACGACXCTCACXAACAAAAGCAGACACTGGTGCTATCCCTCGGGCTCXAAATAXCATTACTXCGGGT
556822	Lama, Soroi Union, AKOTA Office; Lama, Bandarban, Chittagong	AGTTNNNGTXAACCNNTGXNATTGGCGCXTAAXTATANCCNAXXTANNNANAGANGGXXCNTGNCGCTGTCNNXCGNGXTAGXGXCATXXXTXCTACXGAT
556824	Chittagong Medical College Hospital; Panchlaish, Chittagong, Chittagong	AGTCAATATXGACCCCTAACATGAXTACTXAGXCTTATXCXAXXCXAACXAAGGTAXXXXTTXATACCAXXXGXAXGXXTCTXXXCAXTXTXAXTACXGXT
556825	Naikhongchhari, Baishari BRAC office; Naikhongchhari, Bandarban, Chittagong	XXXXXXXXXXXXXXXXXXAXAGTGGCGGCTAACXACAATXAACXXXXXXXXXXXXXXXXXXXXXXXXXXXXXXXXGGGTCAXAGATGXTXTCGCTXCAXXC
556827	Lama, Soroi Union, AKOTA Office; Lama, Bandarban, Chittagong	AGGTAGNATXGACCTGTNTAAGGGATGCTCXGTTTCAACGXAXXCXNGNGGAAGCXGGXACAXACGCTAXCCCXCGGCXTCTXXXCGATCTXXXTATXGXT
556828	Lama Gozalia BRAC Office (2); Lama, Bandarban, Chittagong	GGTXAACGTXGATGCGCATXAGXAACGGTTTGTCTCAACXCATTTXTAAAAGXACATXXACTXGXGCCGACXCCCGGGTTAXAAACAXCACCGTTXCAGGT
556829	Lama, Soroi Union, AKOTA Office; Lama, Bandarban, Chittagong	GGTXGATGCXGATCCGTAACATTXXXAXXXAGXTTTGTCXXAXXCGAGAAAAGAXAGXXATTAACGCCATAACXCGGGXCATCGACAAXCTTXCTATAAAT
556830	Lama, Soroi Union, AKOTA Office; Lama, Bandarban, Chittagong	AGGCAATGTXAATGTGTAAAATTGXXGXXTXAXXTTGACXXXCXCXTGCGAAGACXGXXXCAGACACTGXAACXAAAGXTCGAAACGATCXTGCTTCAGAT
556832	Ramu Mukti Office; Ramu, Cox's Bazar, Chittagong	GGGTAGTGCXNNTCTCTATAATTGXCACXTTGTCTTGNCXATXXCATNAGAAGANGTAXACTAGTACCGAAACXCAGXXCXTXAXTGTXCTTXXTATGAAT
556833	Lama, Soroi Union, AKOTA Office; Lama, Bandarban, Chittagong	GAGNGGCACXNACCTGTGXAAGGGAXAXTXXGXTACAAXXXAXXXXNGCGGAGACXGXXACAAAXNATGACCXXCGNCXTATCAXCAAXXTTXCTATAGAT
556835	Lama, Soroi Union, AKOTA Office; Lama, Bandarban, Chittagong	GGTCGATGTXGACGTGCAAAAGXGXCGXXTXGXCTCAAXCATXXXGTACGAAGAXGTAXATAGGCGACAACACXCXGXXXCXXXXTGAXCTXXXAXXXGXX
556836	BRAC (BHP) -Dighinala; Dighinala, Khagrachhari, Chittagong	GGGNGGCGNXGATGTGTATAXNTGXTXXXTXGXTTTAAXCXXXXCAAACGGANACATXXCCAGNTGCTGXNCCXAGGCCCCTXACCATTATXACTATXAGT
556837	Lama Upazila Health Complex; Lama, Bandarban, Chittagong	ANGXANTATXAATGTGNNTXAGTNNTGGNNAGNCNTNTNXCATXNXAGCAGANACNNAXACTANCNCCNNNCCXANANTCCXANANGXCCNCGCTXTGANT
556838	Chittagong Medical College Hospital; Panchlaish, Chittagong, Chittagong	AANCNGNNCXNACCCGNNTAANTGXTGCCTAATXTNAAXCAACXCAANNNAAGACXGXXXTTGNCANTAXACNXCXACXCCTXXXCATXCTXXXTATXXXT
556839	Farua Brac Office; Belaichhari, Rangamati, Chittagong	GGGXGATGTXGGCCCCTATXAGGAGTAGCTTGCTACGACXCATTTAAAAGGAGATAGACACTGACGCTGTCACTAGACTCAXAAXTGXCCTCGTTTCAAAT
556840	BRAC (BHP) -Dighinala; Dighinala, Khagrachhari, Chittagong	AATCAATGTXGGTGCGCGACAGGAGTGCXTXGCTATGTCCAAXXTATGAAGAGACGGGXATTGGCGACAXCCCXCGAXXTXTXXCXGAXXTXAXTATXXXT
556841	Lama Upazila Health Complex; Lama, Bandarban, Chittagong	AGGXAATATXXACGTGTXTXXTGGANACCTXACCTTXANXCXTXTXTNXAAANXTGGAGACTGGXGCCATNACXCGGGTTCXAGNXXXTNCTXTTXNGAGT
556843	Lama, Soroi Union, AKOTA Office; Lama, Bandarban, Chittagong	GGTCGATGTXGACGTGCAAAAGXGXCGXXTXGXXTCAAXCATXXTGTACGAAGAXGTAXATAGGCGANAACACXCGGGXTCTXAXTGATCTXXCAACAGAC
556846	Ramu Upazila Health Complex (1); Ramu, Cox's Bazar, Chittagong	GGGCGATGTGGACCCCTAXCAGXGACACXXXGCXATATXCAAXTTGTGAAGAGACXGXXCCTAACACCGXCCCXAAAGCCATAAACAXCACTGCTTTGAGT
556847	Lama Gozalia BRAC Office (2); Lama, Bandarban, Chittagong	GAGXAATATXAATCCGTNTXAGTNATGGCCTNTCTXAACXCATXXXXXXXXXXXXXXXXXXXXXXXXXXXXXXXXGACCXAXAAACAXTXTCACTXXGXGT
556848	Ramu Mukti Office; Ramu, Cox's Bazar, Chittagong	GXGTGGTACGGGCCCGTATCAGTGXCAXXTAGXXACGTXCXTXXTXAACGAAGATXTXXACTGGTACCGTCCCXCGGXCCCTXAXCGXXXXTAXTACGGAC
556849	Lama, Soroi Union, AKOTA Office; Lama, Bandarban, Chittagong	GGGCAGCATGGGTCCGCGXCATGXXCGCXXXACXTCGAXCXAXXTATACAGAGACXGAXACTXATACTGTACCXCGACCTXGXXXTAAXXXXXXTATXAXT
556852	Ramu Upazila Health Complex (1); Ramu, Cox's Bazar, Chittagong	GGTCAATGTGGATCCGTGACTGTGGXAXXTXGTTATGACCATXXCATACAAAGGCATGXACAGACACTGTACCXAGAGCCXGXGXTATXXXTXCTATAXGT
556854	Lama, Soroi Union, AKOTA Office (2); Lama, Bandarban, Chittagong	AGGXGGTGTXGATCTCTGTXTTGGGTAGTCTATCACAATXCTTATAAAAGGAGGCGTGXACAGACGACGTCCCXCGGGTCAXAAACAXCCTTGCTTCAAGT
556855	Farua Brac Office; Belaichhari, Rangamati, Chittagong	GGTXAATGTXGATCTCCAAXATTGGTGGCCAGCCTTATTXATTTTAAAAGAAAGCGGAGATTGATGATAAACCXCAGGCTCXCAATGXCATTGCTTCAAGT
556856	Alikadam Upazila Health Complex; Alikadam, Bandarban, Chittagong	GAGXAATGTXGATGTCTATXAGGAGTXGCTTACCATAACXXATTCGAGAGGAGACGTGXATAGACGCTAAAAGTAGACCCCXAAACGXCACCGCTXCGAGT
556857	Farua Brac Office; Belaichhari, Rangamati, Chittagong	GGGXAGTGTXGACGCGTAAXAGTGGCGCCTTACTACAATXCTTTTGTGCAGAGACGGAXACAGACGCTATACCXAGACTTAXAGACGXCCCCACTTCGAGT
556859	Ramu Upazila Health Complex (1); Ramu, Cox's Bazar, Chittagong	AGGCAGCGTXGATCTCTGTAAGTXXTACXTAAXXACGTCCXAXXCXAGAGAAGACXGXXATTGACGCTATCACXAGGCXCXTXAXTAXXXTXAXTACAAGT
556861	Lama, Soroi Union, AKOTA Office (2); Lama, Bandarban, Chittagong	AGGXAATACXGGCGCGTGTXAGGAGCGGCCAATCTTGACXATTXTAAGAAGGGACGTGXACTGACGCTGTCACXCAACTTCXAACCAXCCCCACTTCAAAC
556863	Farua Brac Office; Belaichhari, Rangamati, Chittagong	NNNXNNTGTXGNTGCGTNAXAGTGGNACCCNNTNNTNANXNATTNAANAANAGANNGGXACTGGTGANNTCNCXAGGGNNAXAGANAXCANCGCNXCAAGT
556864	Ramu Upazila Health Complex (1); Ramu, Cox's Bazar, Chittagong	GGGCGATGTXGACCCCTAACAGXGACACXXXGCCATATXCAAXXXGTGAAGAGACXGXXXCTAACACCGXCCCXAAAXCCXTXAXCAXXXXTXCTTTGAGT
556867	Ramu Upazila Health Complex (1); Ramu, Cox's Bazar, Chittagong	GGGCXGCGCXAACGTGTGTCAGTGGTACCCTGCCACGACGCTTATATACGAAGGTGGAXATTAATGACATCCCXCGGGCCCGCAATAXTATCGTTATAAGC
556868	Ramu Upazila Health Complex (1); Ramu, Cox's Bazar, Chittagong	GAGTAGTGCXGACGTGTGAAATGGXCAXXTAGXTTCATCXXAXXTATGAAGGGATGGGXATTAGCGATATCACXAXGXCCXXXXXXAXXXXXXXTXCXAXT
556869	Farua Brac Office; Belaichhari, Rangamati, Chittagong	GATXAGTATXAACGCGTGTXTGNGGTANCCTNTCTTGATXAATTCAAGCAAAGACATAXATTAATGATGAACCXCGGCTTCXAACCAXTATTACTXCAGAT
556870	Alikadam Upazila Health Complex; Alikadam, Bandarban, Chittagong	GGGXGGTGCXGACCCGCGAXTGTAGTGCCTTATCTTATCXAATTTATGCAGAGATGGGXACAXACAACATACCTCAGGTXAXAAACAXTCCCGCTXCAAAT
556871	Lama, Soroi Union, AKOTA Office (2); Lama, Bandarban, Chittagong	XATXXATGXXAXTXXCTAAXATXXXXXXCTXXXCXXGAXXCXTTXGAACGXGGAXXTGXXXXGXCGXCXXCXCXCXXXXCAXAXATGXXCXCXXXTXXXGX
556874	Alikadam Upazila Health Complex; Alikadam, Bandarban, Chittagong	AGTXGGCGCXGACGTCTAAXAGTAGCGCTTAGCCACGACXCATTTAAGAAAAGGTGGAXACTAGCAATATACCXCGGCTTAXCACCGXCCCCGCTXTAXGT
556876	Alikadam Upazila Health Complex; Alikadam, Bandarban, Chittagong	XXGXXXXXCXXAXXXXXAAXXGXAXXXXTXAAXTXXXTTXAAXXXXXXXGXXXAXXXAXXXXGGXXXXXTXXCXXXXXXTAXXXCCXXXAXCXXXXXXXXX
556877	Alikadam Upazila Health Complex; Alikadam, Bandarban, Chittagong	AATXGATATXAATGCGXAAXAXTAGTAGTTAATCTTGATXAACTTAAGAGAGAACGGAXACAGGTGACGTAACCAAGCTTAXAGATGXCXCCGCTXTAAGC
556878	Alikadam Upazila Health Complex; Alikadam, Bandarban, Chittagong	AAGXAGCATXAATCTGXAAXAGXGGCGGTCAGCCTTGATXATTTTATGAAGAGACGTAXACTGATACCGTAAGCCAAGCTCXAGACGXCCCCACTXCAGAT
556879	Lama, Soroi Union, AKOTA Office; Lama, Bandarban, Chittagong	AGTTAACACXGATCCCTGAAATGGXTAXTTAACXATGACCXAXXTXTAAGAGGATGGAXACTXACAATGTACCXAXACXCXXXXCXATXCXXXXTXTXGXT
556880	Alikadam Upazila Health Complex; Alikadam, Bandarban, Chittagong	GGTXAATATXGGTCTGTATXAXTGGTGGCCTGCCTCAACXCATACAAGAAGGAACGGGXACTAACACCGAAACXAGGGTTAXAGACAXCATCGCAXTGXGT
556881	Chittagong Medical College Hospital; Panchlaish, Chittagong, Chittagong	ANGCANTANGAATCTCCAAATNTAXTACTCTACTATNACCAAXXCGAGCAAANACXGXXCCTANNAATGXAAGXAXGXXXXGXXXXXTXXXTXXTXXXXXX
556882	Alikadam Upazila Health Complex; Alikadam, Bandarban, Chittagong	XGGXNGXAXXXGXGXGTGXXAGGGGNGCXCXXXCTCXAXXCXTTXAAXCAAXGAXXGAXNNXAGTXATAXXXCXXXXGTCAXCACXAXCXCCGCTXXAXXT
556884	Lama, Soroi Union, AKOTA Office; Lama, Bandarban, Chittagong	GATCGGTATXAATCCGCAAATTTGXTACTTAAXXATGAXXXAXXCXTACGAAAACGGAXACAAATAACXTCAGXAXGXXTCGXXXXGAXXXXXXTXTXAXT
556885	Alikadam Upazila Health Complex; Alikadam, Bandarban, Chittagong	AGTXGACATXAACGCGTATXAGTGGTGXCCTGTTATGTTXATTATAAAAGAAGACAGAGCTTAGCGCCGTACGTAGGGTTCXAAACAXCCCCGCTXCAAGT
556886	Lama, Soroi Union, AKOTA Office; Lama, Bandarban, Chittagong	AATTAATGTGGGTCCGTAAAAGTAXCACXXAAXTATGTCCATXXTGTACGAAAGCAGAXXCTGGXAATGTAACXCXAXXXCXXXXCXTXCTXAXTXTXGXT
556887	Alikadam Upazila Health Complex; Alikadam, Bandarban, Chittagong	GGGXGGTGCXGACCCGCGAXTGTAGTGCCTTATCTTATCXAATTTATGCAGAGATGGGXACAXACAACATACCXCAGGTCAXAAACAXTCCCGCTXCAXAT
556888	Lama, Soroi Union, AKOTA Office (2); Lama, Bandarban, Chittagong	AGTXAATACXGACCTGTAAXATGGATACCTTATCTTATCXCTTACGTGAGGAGGTAGAGATTGATACTGTCCCXCGGGTCAXAAACAXTCCCACTTTGAAT
556889	Alikadam Upazila Health Complex; Alikadam, Bandarban, Chittagong	GGTXAGTGNXAACCCNTAXXAGGAGTGGTCNGTNNTAACXCATXTGTANAANANCGNAXCCTGNXACTGACCNXNGGNTNAXAGANNXCXCTANTXCAXNT
556891	Alikadam Upazila Health Complex; Alikadam, Bandarban, Chittagong	GATXAGCGTXGACCCGTATXAXTGGCGCCCTACTATATCXCATTCAAGAGAAGACATAXACTGGXGCTGTCCGXCGGGTTCXCGACAXTCTTGCTXCGXAT
556892	Lama, Soroi Union, AKOTA Office; Lama, Bandarban, Chittagong	AAGCGGTACXGATGCGTAXAAGTGXTGXXXAGCXTCATCXXAXATATGAGAAGATGGACACTAATGATGTACCXXXGXXTCGXXXCXATCXXXXTXTXGXT
556893	Alikadam Upazila Health Complex; Alikadam, Bandarban, Chittagong	AAGXAATGTXGATCTGCATXAGTGGCAGTTAATTTTATCXCTCTCAAGAAGAGGCGTACACTAATGCTATCACTAGGGTCCXAAATGXCATTGCAXCGGGT
556895	Lama, Soroi Union, AKOTA Office (2); Lama, Bandarban, Chittagong	GATXAATGTXNATCTCTAAXATTAACGCCTAGCTTTGANXCATXTAAAAGAAGACGTGXATTAGCGANATCCCXAGGCNCAXAAATGXCACCACTTCAGGT
556896	Alikadam Upazila Health Complex; Alikadam, Bandarban, Chittagong	AGGXGGTGCXGACCTGTGAXAGTAGTGCCTAGCTTCATCXCATTTAAGAGAAGGTGGAXACAAGCACTATAAGXCAACTCAXCAATAXTXCCACTXCGXGC
556897	Alikadam Upazila Health Complex; Alikadam, Bandarban, Chittagong	NNTXANTGTXGACNNNTNXXAGTNGTACCCTNTNATANNXCTTXTANGCAAANANGGNXACAGAXGCTGTCCCXAANCNNCXAGNNAXTCNCACTXCGXAC
556898	Alikadam Upazila Health Complex; Alikadam, Bandarban, Chittagong	XGGXXXXXXXAAXXXCXGXXXXXGXXXXXTXXXCXCXXCXXXXXXXXXXXXXXXTXXGXXXXXXXXCXXAXXXXXAGXXXAXAACTAXCXCCXXXXXXXGT
556899	Chittagong Medical College Hospital; Panchlaish, Chittagong, Chittagong	GGGCGATGCXAATCTGTAAAATTAXCACXTTGXCTCGTCXATXXCATAAGGAAATGGGXACTGGTGACATAACXAAGCXCXTXAXXGTXXXXACTATAGGT
556900	Lama, Soroi Union, AKOTA Office (2); Lama, Bandarban, Chittagong	AGGXAGTGTXAGCGCGCATXATGGGCGCTTAACCTTATCXCATACATGCAGAGGCATGXCCTAATGATGTCAGXAGGGTTAXAGACAXTCCTACTTTAXGT
556901	Alikadam Upazila Health Complex; Alikadam, Bandarban, Chittagong	XAXXXXXXXXAXCXXXXXTXAXXXGXXGTXXXTTTXXXXXCXXXCAXXXXXAXXXXGGXAXXAXXXXCGXXXXXXXXCXXXXXAAXXXCXXXXXTXXXXXX
556903	Lama, Soroi Union, AKOTA Office (2); Lama, Bandarban, Chittagong	NNGXANNNNXNATNNGNATXTXGANNNNNCNGNTNNGNNXCNTTNATAAGGANNCGGAXATTGGXGNTNTCCNXCGGCNNAXANACAXCNCNGCTTNNGAN
556904	Alikadam Upazila Health Complex; Alikadam, Bandarban, Chittagong	AGTXAATGTXGACGTGXGAXAXTGGTGCTCAATCTCAATXCATATAAAAAGAGATAGAXCCTGACACCATACGXAGACTTCXAAATAXCCCCGTTXCGGGT
556906	Lama, Soroi Union, AKOTA Office; Lama, Bandarban, Chittagong	AAGCGGTACXGATGCGTATAAGTGXTGXXXAGCCTCATCXXAXATATNAGAAGATGGACACTAATGATGTACCXXXGXXTCGXXXCAATXXXXXTXTXGXT
556908	Lama, Soroi Union, AKOTA Office (2); Lama, Bandarban, Chittagong	GATXAATGTXNATCTCTAAXAXTAACGCCTAGCTTTGNNXCATXTAAAAGAAGACGTGXATTAGCGANATCCCXAGGCTCAXAAATGXCACCACTTCAGGT
556909	Lama, Soroi Union, AKOTA Office; Lama, Bandarban, Chittagong	GGGCAANGNGGATNCGCNXCATGGXXGCXTAGCXTNGNXCXAXXTATACANAGACGGAXACTGACNCTGXCANXXXGCXTXGXXXCXAXXXXAXTXTXAXT
556910	Alikadam Upazila Health Complex; Alikadam, Bandarban, Chittagong	GAGXAGTATXGATGCCTAXXAGTAATAGCCTATTTCGTTXCTCTTAAGCAGAGATGGGXCCTAAXGACGTACCXCAGGCCAXAGCCGXCACCGCTXTAXAT
556913	Chittagong Medical College Hospital; Panchlaish, Chittagong, Chittagong	AGGCAGTGTXAACGTGTGTAXTTGAXAXTTXGXXTCAAXCXAXXTXTAAGAAGACAGXXACAGATACCGTCXGXAGAXCTXTCAXCAAXXXXXXTATAGAT
556914	Ramu Upazila Health Complex (1); Ramu, Cox's Bazar, Chittagong	AGNCANCATXGNCCNGNATAATTNGTGCCTTGTTACAACNCATXNANGAAGNGACGNGXACAGATACCATCXCXXGGCTCAXAGCCATCNCCACTANAGAT
556915	Ramu Upazila Health Complex (1); Ramu, Cox's Bazar, Chittagong	AAGCAGTATXAATGTGTATATGTGGCACCCAATTTTATTGATTXTATAAAAAGATATAXACTGACAACAACACXAGAGTCCGAAATGATACCGCTATAAGT
556916	Ramu Upazila Health Complex (1); Ramu, Cox's Bazar, Chittagong	XXXXXXXGCXGXXGTXXGXXXGXGXXGCXXXXXXXXXATXXXTTXXXXXXGXGXXGXGXXCXXXXXCXXXXXGXXAGCCXXXXGXTXXXXCXXCXXCAXXX
556917	Ramu Upazila Health Complex (1); Ramu, Cox's Bazar, Chittagong	AGGCAXCATXGGCCCGTATAATTXGTGCCTTGTTACAACXCATXCAAGAAGXGACGGGXACAGATACCGTCACXXGGCTCATAGCCATCCCXACTACXGAT
556918	Ramu Upazila Health Complex (1); Ramu, Cox's Bazar, Chittagong	AAGCGATGTXGGCCCGCAAAAGGGGCGGTTTGTTACAACCCTTTTATACGAGGACGTGXATAGACACTGTACCXCAAGTCAXAAACATTCCCGCTACGAGT
556919	Ramu Upazila Health Complex (1); Ramu, Cox's Bazar, Chittagong	NNTCAANNNXNACCTCNNTNTGNNNCGGCNTNNCNNGNNGNATXNNTACAAANACGGNXACTGACANTAXCCCXNGNGNTCGANACGANNCNGNNATANGT
556920	Ramu Upazila Health Complex (1); Ramu, Cox's Bazar, Chittagong	AGTTAGCGCXAATGTGTAAAATTGATAGTCTGTCTTAACCAATACAAGAAAAGACGGGXCTTGACAATGTCCCXCAGGTCCTAGACAACCCTACTACAAGT
556923	Ramu Upazila Health Complex (1); Ramu, Cox's Bazar, Chittagong	GANNANTGCXNANCTGCATNNNNAGNANTCTANNNNAATGNACATAANAGGAAACGGAXCCAGGNGNCATACCXNNACTNNGANACAATCCCGTNNCNNGT
556924	Ramu Upazila Health Complex (1); Ramu, Cox's Bazar, Chittagong	XGNCXAXNTXNACGCNTGTCANGGGCGCNCTGTTACATCGNATXCANNAGAANACNGGXXCTGGCAATAAAACXCGGCTTATANACAATANTGCTACAAAT
556925	Ramu Upazila Health Complex (1); Ramu, Cox's Bazar, Chittagong	GGTCAGCATXAGTCTGTAACTGTGGCACCCTACTACATCCCATXTATACGGAAATGGAXCTAXGTGCCGTCCCTXAGCTTAXAGACAACATCATTACGAGT
556926	Ramu Upazila Health Complex (1); Ramu, Cox's Bazar, Chittagong	XXTNAATXCXAXTGCXTAXXAXXGXCGCXXXXTXAXXACXXXXXTATXAXXAGXTNTAXXCTGGXACCAXAXNXXAGCTXXXCGCXGAXCCXGCTACAXXT
556927	Ramu Upazila Health Complex (1); Ramu, Cox's Bazar, Chittagong	GGTCXGCATXAATCTGTAAAATGAGCGGCTAGCCATGACGAATXTAAACGAGGGCGGGXACTAGTAATXACAGXAGACTTCGCACTAATCCCACTACAGAT
556928	Ramu Upazila Health Complex (1); Ramu, Cox's Bazar, Chittagong	AAGCAGTATXAATCTCCAAAXTTAXTACTXXACTATGACCAAXXCGAGCAAAAACXGXXCCTAAXAATGXAAGXAGGXXTXGXAXCATTCXTXXTXCXGXC
556930	Ramu Upazila Health Complex (1); Ramu, Cox's Bazar, Chittagong	GGTXGACGCXGATCTCXAAXAGGGGTAGCTTGTTTCATCXAXTXCATAAGAAGATGGGXACTAGXAACGACAGXCAACCTAXAACTGXTACCGCTXCGXGC
556931	Ramu Upazila Health Complex (1); Ramu, Cox's Bazar, Chittagong	AGGCAGCGTXGACCTCTAACAGTAGCGCTTAGTCTTATTCCATATGAGCAAAGACGTAXATTAGTGCCGTAACXAGGCTCAXAAACATCACCGCAACAGGT
556932	Ramu Upazila Health Complex (1); Ramu, Cox's Bazar, Chittagong	AGTTXATGTXAATCCGCATCTTGAGCGCCTTGTTTTGTTGAATXTATACGGAGATGGGXACTAACACTGTCCCXCGAGTCCXAAACGATCTCGTTATGGGT
556935	BRAC (BHP) -Belai Chhari; Belaichhari, Rangamati, Chittagong	GGGXAATATXGATGCGTAAXAGGAGTAGCCAGCCTCATCXCTTXTAAAAGAAGACGGGXATAGGTACTGTAACXCGGGCTCXAAACGXTCTCGCTXTGXAC
556938	Chittagong Medical College Hospital; Panchlaish, Chittagong, Chittagong	GNTCANNATXGACCCNNATCANGAGCGXXXTAXCTCAACXAACXNATACAAGGATGGAXACAAACNCTGTACCXNGAGXTCNXAXCAAXAXXACAATGGGT
556939	BRAC (BHP) -Belai Chhari; Belaichhari, Rangamati, Chittagong	GGNXGACGTXANCGCCTNTXATGGGCGCNTTACCACATTXCACXCGANCAGANGNGNAXACAGATGNNGTACGXCAGCTTNXANCTAXTCTNACTTNAAAT
556944	Ramu Upazila Health Complex (1); Ramu, Cox's Bazar, Chittagong	AGTTAACGTXGACCCGTGAATGTAACGGTTAACTACGACGATCXCATGAAGAGACGGAXACTGACGXTATAACXCAGCTCAXAGACAXCXCCGTTTTAGAC
556949	Ramu Upazila Health Complex (1); Ramu, Cox's Bazar, Chittagong	GGTTAATGTXGATCTGTATCATTAGTACCTTATTTTGACGCATTTAAGCAGAGACAGGGATAAGCACCATCCCXCGAGTTCXAGACAXCATTGCTATGGGT
556950	Ramu Upazila Health Complex (1); Ramu, Cox's Bazar, Chittagong	AGGTGATGCXGATGTGTGACAGTGGTGGTCAACCTTAACGAATXTAAGCGGGGATGTGXCTTGGTACCGTCCCXCAACTTCXAAACGACXTCGCTACAGGC
556959	Ramu Upazila Health Complex (1); Ramu, Cox's Bazar, Chittagong	AATTAATATXAATXCGTAAAAGTGGCXGCTAATTATGTCCCTTXTATGCGAAGATGTAXACTGGTGCCGTACCXAAAGTTATAACCGACATCACTTTGGAT
556961	BRAC (BHP) -Belai Chhari; Belaichhari, Rangamati, Chittagong	GGNXGNTANXGATGCGTAAXAGNNATANCNAGTCTCATTXCTTXCANNAANGNATGTGXANAAGXACCATCACXCAGNTTNXAAACNXCANTACTTCGXGT
556963	Ramu Upazila Health Complex (1); Ramu, Cox's Bazar, Chittagong	AGGCGGTGTXAATGTGTATAXGGGXXACTTXGCXTTATCXXXXXCATAAAAAGATXGAGXTTAACACCAACCCXCAGCXTCTXXCCAAXCTXAXTXTXXAT
556964	Chittagong Medical College Hospital; Panchlaish, Chittagong, Chittagong	GATTGGTGTXGATCTGCGTAXGTGXXAXXTAGXTTCGAXCXAXXCGTGCGAAGACGGGXXCTAGCGCTATCCCXAAGXXCXXXACXGAXXTXACTACGAXT
556966	Ramu Upazila Health Complex (1); Ramu, Cox's Bazar, Chittagong	AGTTAGCGTXGATGCGTGAAATTAGCXCTCAGTTATGATGATTACGTAAGGAGACGGGXCCTAGTGACAAAACXAGGGCCCXAAACXACATCATTATAAGT
556968	Ramu Upazila Health Complex (1); Ramu, Cox's Bazar, Chittagong	GANTAGXGNXNACXCGNAAAAGTNGNGNNTAANTACNANNNATXTNNNCGAANANGGAXCCNAACNCNNTNCCXANAGTTCTNNATNACNCTGCTACNGGC
556970	Ramu Upazila Health Complex (1); Ramu, Cox's Bazar, Chittagong	GGGCGGCGCXAACGTGTGTCAGTGGTXCCCTGCCACGACGCTTXTATACGAAGGTGGAXATTAATGACATCCCXCGGGCCCXCAATAXTATCGTTATAXGC
556971	Lama Aziznagor BRAC Office; Lama, Bandarban, Chittagong	XAXXNATAXXAXCCXNTXTXXTXAXXXCTCAAXTTXAXCXANCTXXTXXAXAXGCXGAXXTXAXXGCXATXXGXAGGXXXAXXXATXXTXXCXCXTXGXXX
556973	Chittagong Medical College Hospital; Panchlaish, Chittagong, Chittagong	GAGXAGTATXGACCCGCAAXATTGGTACCTTATTACGTCXCATATATACAAAGATGTGXATTAACACTATACCXAAGGTTCXAAACGXTCCTGCTTCAXAT
556974	Chittagong Medical College Hospital; Panchlaish, Chittagong, Chittagong	GGTCXGXGTXAATCTGTATAATTGXCGXTXTAXXACAACXXTXXTGTGAGGAGACAGAXATAAACGXCXTCACXCGGGXTXGXAXTGXXXXXACTTCAAGT
556975	Lama Aziznagor BRAC Office; Lama, Bandarban, Chittagong	GGGXGGCGTXAACCTGCATXAGTAGCAGCTAGCCACGTCXCATTCATGAAGAAACGGAXCCTAACGCCAACCCTAGACTTCXAAATAXCACCGCTTCGAGT
556977	Lama Aziznagor BRAC Office; Lama, Bandarban, Chittagong	GGGXGGTACXAACGCGTGTXATTGGCGGCCTGCTTTAATXATCACATGAAAAGACGGGGACTAATGCTGTAAGCAGACCCAXAAACGXCATTACTTCAGGT
556979	Ramu Upazila Health Complex (1); Ramu, Cox's Bazar, Chittagong	GANTAGTGNXNACCCGNAXAAGTNGCGNNTAANTACGANNNATXTNNNCAAANANGGAXCCTAACNCTNTNCCXANAGTTCXNNATNACCCTGCTACNGGC
556980	Ramu Upazila Health Complex (1); Ramu, Cox's Bazar, Chittagong	AGGCAGCGTGGACCTCTAACAGTXXCGCTTAGXXTTATXCXAXXTGAGCAAAGACGTAXATTAGTGCCGTAACXAGGCTCATXAACATCAXCGCAACAGGT
556981	Chittagong Medical College Hospital; Panchlaish, Chittagong, Chittagong	AGTTAGTGTXAATGCGTGXCAGTXXTGXXXXGCXACAACXXXXXCGTGCAAAAACAGGXACTGGCACTATCCGXXAACXCAGCAXTAACAXXXCTTCGGAT
556983	BRAC (BHP) -Belai Chhari; Belaichhari, Rangamati, Chittagong	AGGXAATGTXGGTCTGTGAXTTGAGTACCTTGTTTTGTCXATTXCAAGAAAAGACGGGXACTAAXACTATCCCXAGGGTTAXAGATGXTCTCACTTCGXGC
556984	Ramu Upazila Health Complex (1); Ramu, Cox's Bazar, Chittagong	AGTTAACGTXGATXCGCATAATTAGCXGCCTACCTCAACGAATXCATAAGAGGATGGAXCCTAATACCATCACXCAGGTCCXAAACGACCCCGTTATGAGT
573660	Ramu Upazila Health Complex; Ramu, Cox's Bazar, Chittagong	AGXTGGCXTXAACGCGTAXATTGAGCACCTTATCTXGXTGATTACATACAXAGXTGXAXACAXGCACTGTCXCXXGAGTTCTAAACGATCTTGTTACGXGT
573661	Ramu Upazila Health Complex; Ramu, Cox's Bazar, Chittagong	AGXTGGCGTXAACGCGTATATTGAGCXCCTTATCTTGATGXTTACATACAXAGXTGGAXACAXGCAATGTCXCXXGAGTTCTAAACGATCTTGTTACGXXT
573662	Ramu Upazila Health Complex; Ramu, Cox's Bazar, Chittagong	AGXTGGCXTXAACXCGXXXXTXXAGCXCCTTATCTXGXTGATXXCATACXXAGXTGGAXACXGGCACTGTCXCXXGAGTTCXAAACGATATTGTTACGXGT
573702	Ramu Upazila Health Complex; Ramu, Cox's Bazar, Chittagong	AGXTAGXXCGGNCGNGTAXNATNNGCXGNNAGNNNTGXTGCATTNANGCXXNGXNGTAXNCTGGCACCGTAXCXXNNGTTAXAAACNTCACTNNTACGGAC
573703	Ramu Upazila Health Complex; Ramu, Cox's Bazar, Chittagong	AAGCAACATGGACGCGTAACAGTGGCAGTTAGCTATAACCCTTTCGTGCGXAGXTGGAXACTGGTGACGAAXCXAGAGCTAGAGATAATACCGTTACAAGT
573704	Ramu Upazila Health Complex; Ramu, Cox's Bazar, Chittagong	AAXCAACATGGACGCGTAACAGTGGCAGTTAGCTATAACCCTTXCGTGCXXAGXTGXAXACXGGTGACGAAXCXXGAGCTAGAGATAATACCGTTACAAGT
573705	Ramu Upazila Health Complex; Ramu, Cox's Bazar, Chittagong	XXXXXXXXXXXXXXXXXXXCAGTGGCXGTTAGCTATAACCCTTTCGTGCGXAGXTGGAXACTGGTGACXAACCXXGAGCTAGAGATAATACCGTTACAAGT
574007	Ramu Upazila Health Complex; Ramu, Cox's Bazar, Chittagong	NGXNAGCXNXGACCXGXAXATXXAGCXNTNNXCNNXAACGNXCTTANGXXXAGXCGGGXANXAACXNNGAXXGXXNACTNAXAAANATCNCNNTTACNXAN
574009	Ramu Upazila Health Complex; Ramu, Cox's Bazar, Chittagong	XGXNAGCXNGGACXXGXAXANXXAGXGCTCNACNNXNXCGNANXTAAXXXXGGXCGGNXXNXAACXAXXAXXGXXANCTXAXAAACXTCXCTNTTACNAAN
574015	Ramu Upazila Health Complex; Ramu, Cox's Bazar, Chittagong	XGXTXAXXTGAACGTGCAXXAXXGAXGGCCAGTCTXAXCCCATXTXTXXXXAGXCGXGXXTXGGXXCCXTXXCXXAGCTCXXAGACATCACCAXXATGGAT
574016	Ramu Upazila Health Complex; Ramu, Cox's Bazar, Chittagong	GGGTAGCGNGGACCCGTAXAAGXANCGCTNTATNNCGXCGCACTTANGAAXGGXNGGAXXNAAACGCNGACAGXCAACTTAXAAANATCCCCATTANNAAN
574021	Ramu Upazila Health Complex; Ramu, Cox's Bazar, Chittagong	XGXCANCATXGATXTCTAXANXXAGTXCTNAGTNTXAXTCAACXCANGXXXAGXCGXNXACXAATXCTGACXCXXAGGCTCXCAACATCATCGCTACAAGT
574258	Ramu Mukti Office; Ramu, Cox's Bazar, Chittagong	AAGTAATGTXGATGTGTATAAGTGXTXXXCAAXCATGAXXXAXXXXTAAXAAGACXXXXATTXGTGACGXCXXXAGAGXTXTXXXTAXTXTTXXTTCXAAT
585670	Ramu Upazila Health Complex (1); Ramu, Cox's Bazar, Chittagong	GGXXGXCGXGAXTCXXTGXCAGTXGCGGCCXACCTTAAXCAATXTAAXXXXAXXXGXXXXXXXXXGCXATCXXXXGGXTXAXAAATXACCTTGXTACAGXT
585766	Ramu Upazila Health Complex (1); Ramu, Cox's Bazar, Chittagong	GANXGATATXAGCNTGTNTXAGGGNNGGCCTNTCNNNNNXCNTXCATGCGGNGANATAXNNTGAXACCANACCXAAGCTCNXAGACAXCCCTACTXCGXNT
585773	Ramu Upazila Health Complex (1); Ramu, Cox's Bazar, Chittagong	GGTXAGCXTXGGTXCGTAXXAXTAGTAGCCTGTCACAAXXCATXCXTAAAAGGATXGAXXTTGAXGCTGAACGXXGGGXCCXAXCCGXTXTTGCTXCGXGT
585800	Ramu Upazila Health Complex (1); Ramu, Cox's Bazar, Chittagong	XXXXAXTXCXXXXCXXXATXXXXXGXXXXXXGXXXXXXXXXXTXCXXGXXXXGXXXGAXXXXXXXXACAXXCXXXGXXXXAXXXXXGXTXXCACXXXAXGT
585811	Ramu Upazila Health Complex (1); Ramu, Cox's Bazar, Chittagong	GAGXAGCGNXGATGTGXATXAXTGGNAGTCAGTCTTNACXCNTTTATACGGNGGCGGAXATTGGCGATGNAACXCAAGNTAXAAACGXCXTCGNTXCNXAT
585820	Ramu Upazila Health Complex (1); Ramu, Cox's Bazar, Chittagong	GGTXGATGTXGACGTGCAAXAGTGGCGGCTTGTCTCAATXATTTTGTACGAAGACGTAXATAGGCGATAACACTCGGGTTCXAAATGXTCTCGCAXCAGAC
585821	Ramu Upazila Health Complex (1); Ramu, Cox's Bazar, Chittagong	AGTXAGCGCXAATGTGTAAXAXTGATAGTCTGTCTTAACXAATACAXGAAAAGACGGGXCTTGACXATGTCCCXCAGGTCCXAGACAXCCCTACTXCAAGT
A000001	Naikhongchhari, Baishari BRAC office; Naikhongchhari, Bandarban, Chittagong	GGGXAGTGTXAATCCGTGTXAGTAATAGCTTATCATGACXCATTTATAAGGAGATAGAXACTAATACCGAACCXAGGGCTAXAAACAXCCCCGCTXTGAGT
A000002	Lama Upazila Health Complex; Lama, Bandarban, Chittagong	AAGXGATGCXGACCCGTATXATGAGTGCCCTGTCATATTXATTXTXTACAGAGGTGGAXAXTGGCACCATACCXAGGGTTAXAGACAXCACCACTXCAGGT
a000004	BRAC (BHP) -Barkal; Barkal, Rangamati, Chittagong	GGTXGATGTXGACGTGTGTXAGTAGCGCCCAACTACATCXCTTXTAAGAGGAGATGGAXACAGGTAACGTACCXCGGCTCAXAGACAXTATCGCTTTAXGT
A000005	Lama, Soroi Union, AKOTA Office; Lama, Bandarban, Chittagong	AGGXANTNTXNNTCTNTAAXNNGNNTNNCNTGCCNTAACXCNNTNAANCAAANNTGTAXACNGNCNCTGTCACTCNNNNTNXANANNXNNCCNCTXNGNAT
A000006	Lama Upazila Health Complex; Lama, Bandarban, Chittagong	GGTXAATGTXGATCTNNNAXAGGGGCACCTAATNTTAATXAATTTGTGAANAGANNGAGACTNACNATAACNCXAGGGNNNXAGNCGXCACTANTXCNNAT
A000008	BRAC (BHP)-Ruma; Ruma, Bandarban, Chittagong	GGTXGATACXGACCCGTGXXXXXXXXXXCXXXXCXXXXXXXXXXXXXXXXXXXXXXXXXXXXXXXXXXXXXXXXXGGGTTAXAGATAXTCTTATTXTGXGT
A000009	Lama, Soroi Union, AKOTA Office; Lama, Bandarban, Chittagong	GGNXANCGNXNNNCNNNATXAGTNGTGCNNNGNCNCNNNXNNNXNXNNCANNNNCNNNCACNNGTNCNANCCCTNNNGNTNXANANAXNANNACTXNNGNT
a000010	BRAC (BHP) -Lama; Lama , Bandarban, Chittagong	AGTXGATATXXACCTGTATXAGTGATACCCTGTTTCATTXCATXTAAGAGAAAGCAGGGACTAACACTATCACXAAAGTTCXAAATAXCATTGCTTCGAGT
A000011	Lama, Soroi Union, AKOTA Office; Lama, Bandarban, Chittagong	AGGXAATGTXAATCTGTAAXAGTGATGGCCTGCCATAACXCTCXCXAGCAAAGAXGGAXACTGACGCTGTCAXTCAAGTTCXAGATAXCACCGCTXCGGAT
a000015	Fakirachara Brac Office; Jurai Chhari, Rangamati, Chittagong	GATXGNTATXAGCNCGCNAXAXTAGTGGNTTGCCACAANXNATNNAANNAAAGACNNAGANAAGTNATATACCCANGGCCAXCNATNXCCCNNCTTCNNAN
A000016	Naikhongchhari, Baishari BRAC office; Naikhongchhari, Bandarban, Chittagong	GGGXNNCXNXAATGTGTGTXAXNGGTGGTNXXTXTCANXXAATTTAAXCGGAGACGTGXCTAXGNGCTATXXGXXGGCCCCXCAATAXCATXGCTXCAGGT
A000018	Lama Upazila Health Complex; Lama, Bandarban, Chittagong	AGTXAATACXGACCTGTAAXATGGATACCTTATCTTATCXCTTACGTGAGGAGGTAGAGAXTGATACTGTCCCCCGGGTCAXAAACAXTCCCACTXTGAAT
A000021	Ramu Upazila Health Complex (1); Ramu, Cox's Bazar, Chittagong	AGTXAGTGTXGGTCCGTAAXAGTGGCACTCTATCTCAACXCATXCAAGCGAAGATXTAXACTGGCGACAACACXCGACTCAXAGCCAXTACCGCTXTAGGT
A000022	Naikhongchhari, Baishari BRAC office; Naikhongchhari, Bandarban, Chittagong	AGTXGGCGTXGGTCCGXATXAGTGGCACCTTATTTTATTXAATATATGAAAAGATGGAXACTAACGCTGTCCCXCGGGTCAXCAACGXTCCCGCTXTGGGT
A000026	Lama Upazila Health Complex; Lama, Bandarban, Chittagong	GGTXAGTATXAATCCCTATXAGGGGTGCCTTATTTTATCXCATATXTAAGAAGACGTAXAXTAACAACATCCCCCAAGTCAXAGATAXTCTTGCTXCGAAT
A000027	BRAC (BHP)-Ruma; Ruma, Bandarban, Chittagong	GGTXGATACXGACCCGTGTXAXTGACGCCTAGTCACAATXCATXXXXXXXXXXXXXXXXXXXXXXXXXXXXXXXXGGGTTAXAGATAXTCTTATTXTGXGT
A000029	Lama Upazila Health Complex; Lama, Bandarban, Chittagong	GGGXANTGCXANCGCGCANXAGXGGTNNNCTGNCNNANTXCATXNXTACGAAGACGGAXACNGNCNCNGTCCCTNGANTTNXAGATAXNNTCACTXNGAAT
a000033	BRAC (BHP) -Lama; Lama , Bandarban, Chittagong	GGGXAGTGTXGATCCGTAAXTTTGGCAGTTAGTCTTAACXCTCTCAAAAGXGXGCAGGGACTXACGACGTCAGTAAGGTTCXAAACXXCATTACATCAAAT
a000034	BRAC (BHP) -Lama; Lama , Bandarban, Chittagong	AGGXGGTGTXAATGTGTATXATTGGCAGCCTATCATATCXCTTXTATACAAAGACGGGGCCTAGCGCCATCCCXAGGGTTAXAGACGXCACCACTTTAAGC
A000035	Lama Upazila Health Complex; Lama, Bandarban, Chittagong	GAGXAGCGTXGGCGTGTAAXAGTGGTGGTCAACCTCGTTXCTTTCXTGAGGAGATGGGGAXAGATAATATCCCCCGGCTTAXAGACGXCATCATTXTAGGT
A000036	Lama, Soroi Union, AKOTA Office; Lama, Bandarban, Chittagong	AGTXAGTGTXAGCCTGCGTXAGGGGCGGCTTGTCTCGACXAATTTGTAAAAAGATGGACACAGGTXCTGACAGTCGGCTTCXAGACGXTATTGTTXXAAXC
A000039	Naikhongchhari, Baishari BRAC office; Naikhongchhari, Bandarban, Chittagong	GGGXAGCATXAATCTGTATXAXTGGTXCCCAACTATATTXCTTTCAAGAXGAAACGGAGCCTGACGCTGTCAGCAGGCCTCXAAACAXTCCTGCTXCAAGT
A000040	Naikhongchhari, Ghumdum BRAC office; Naikhongchhari, Bandarban, Chittagong	GGGXAGTNNXGNTNTGTANXAXTNGTNGNCNGNTATAACXATTTTANAAGNAGGNGGAXNCTANCAATATACCCAAACTTCXAACCNXNANTNCTXCANGT
A000043	Lama, Soroi Union, AKOTA Office; Lama, Bandarban, Chittagong	AGNXGNNATXAATCTGNNTXNXNNGTGNCTAGTNNCAACXAATTCANGCAAAANCNGAXACTGNNNCCNNCNCCANNNTCCXAAATAXNANCACTXNNAGT
a000044	BRAC (BHP) -Lama; Lama , Bandarban, Chittagong	AGTXGATGCXGACGTGTGAXATTGGTAGCCAATTTTATCXCATATATACAAAGACGGGXACTAGCGACGTCCGXCAGGCCCXAGATAXCCTCACATTAAGT
A000052	Ramu Upazila Health Complex (1); Ramu, Cox's Bazar, Chittagong	GNGXNANGNXAGTNCGTNTXAXGGNCAGCNTNTNANANNXCNNTNANNNXNAGANNGAXANTGNCANNNTNACXAAACTNNXANNNNXNNNCGNTXCAXGT
A000054	Lama Upazila Health Complex; Lama, Bandarban, Chittagong	AGGXAATATXGACGTGTAAXATTAGTAGTCTGCTATGACXCACTTXAAAGAAGACAGAGACTGGCGCTATCAGCAGAGTCCXAAACAXCACTACTXCGGGT
A000055	Ramu Upazila Health Complex (1); Ramu, Cox's Bazar, Chittagong	GATXAATGCXAACCTGTATXAXGGXTGXCTTGCCTTAATXAAXTTAAGAGAGGATGGAXATAAGCGXTATACCTAGGGTCCXAAATAXCCCTGCTXCAGAT
A000056	Lama Upazila Health Complex; Lama, Bandarban, Chittagong	AGTXAACGTXGACCTGTATXAGGGGTACCTAGTCTCAATXAATTTXAGXAGAGATGGAGAXAAACACCATCAXCAGGGCTAXAGCCAXCCCCACTXCGAAT
a000057	BRAC (BHP) -Lama; Lama , Bandarban, Chittagong	GGTXAGCGTXGATCTCCGAXAGGGGCGCCTTACCTTAATXAATTTGTGAAAAGACAGAXACTGACGATGACCCXAGGGTCAXAAACGXCACTATTTTAGGT
A000060	Alikadam Upazila Health Complex; Alikadam, Bandarban, Chittagong	XXXXXXXXCXXXXGXXXXXXXXXGXXGXXXXXXCTXXXCXAXXXXXXGXXXXAGXGXXXXXXGGXXXCGXXXXCXXXXXXCXXXXXXXXXXCAXXXXXXXX
A000061	Alikadam Upazila Health Complex; Alikadam, Bandarban, Chittagong	AGTXAATATXGACGTCTAAXAXTGGTAGTTTGTTTTAACXAATTTATGCGAAGACGGAXATTAGCGCCAACCGTAGAGCTCXAAACGXCACCGTTXTGAAC
A000062	Lama, Soroi Union, AKOTA Office; Lama, Bandarban, Chittagong	GATXAATGTXAACCTGTGTXTXGAXCGGCCTATTACAACXCATTCXTGAGGAAGCGGGGACTAACACTGTAACCAAGCTTAXAGACGXCACCACTXTGAAT
a000063	BRAC (BHP) -Barkal; Barkal, Rangamati, Chittagong	GGGXAGTGTXGGTGTGTATXAGTGGCACCTTGCTATGTCXATTXTAAAAGGAAGTAGGXCCTXATGCTGTCCCXCGGCTTAXAGACGXTCCXGTTTCAXAT
a000064	BRAC (BHP) -Lama; Lama , Bandarban, Chittagong	GGGXAATACXGATCCCTATXTTGGGTACCTTATCTTATCXCATATATACGAAGATGGGXACTGACAATATCCCXCGAGTCAXAAATAXCCTCGCTXCGAAT
A000065	Lama, Soroi Union, AKOTA Office; Lama, Bandarban, Chittagong	GGGXGACGTXAATCCGTGAXATGAACAGCCTGTTTCAACXAACTTXAGCAAAGACGGAXACTAACGATAACCCXCGGCTTAXAGCCAXCACCACAXTAXAC
A000066	Alikadam Upazila Health Complex; Alikadam, Bandarban, Chittagong	GGTXAGCGTXGATGTGXGTXAXGGGCGCCTXGCCATAATXAATTCATGCAAAGGTGGAXACTGGCACCGTACCCAGACTCCXAGACGXTACCACTXCAXGT
a000067	BRAC (BHP) -Lama; Lama , Bandarban, Chittagong	NNGXNNNGNXAATNTGTAAXAXTGATANNCAGCNTTNATXCATXNATGAGAAGATGGGCCCTAATACCATNAGXCGAGNTAXAAANAXCCTNGCTXCGANC
A000068	Lama, Soroi Union, AKOTA Office; Lama, Bandarban, Chittagong	NGTXAATNTXNATNCGNATXATGNNCNCNNNGTCANAACXCNTTTGNANNANNNTGGNXACNGGCGCTGTCNCCAGACTTNXANNCAXTNCNACTXNNNNT
A000071	Naikhongchhari, Baishari BRAC office; Naikhongchhari, Bandarban, Chittagong	GGGXGATGNXAATGCNTGTXAXGGGTGGTTNANCNTATCXNATTTATAAGNAGANGTGXNNAGGNGCTATCCNTNAGCNTNXCAATAXCCNTGCTXCAGGT
A000072	Naikhongchhari, Baishari BRAC office; Naikhongchhari, Bandarban, Chittagong	AGTXAGTACXGGCCCGTAAXAGGGGCACTCTGTCTCAACXCATTTAAGCAAAGACGGAXACTAGCGCTAACCCXCAGGTTAXAGCCAXTACCGCTXCGAGT
A000075	Alikadam Upazila Health Complex; Alikadam, Bandarban, Chittagong	XXXXXXCXCXXAXCXGXXXXAXXXXXXCCTAXXXXXXTTXXTTXTXTGXAXAXXTGGAXXCXXXTXXXXTXXXXAXXXXXNXXGACXXXXXXXXXXXXXXX
a000077	BRAC (BHP) -Lama; Lama , Bandarban, Chittagong	GGGXANTGCXANCNCGCAAXAGXGGTNNNCTGNCNCANTXCATTNATAAGAAGACGGAXANNGNCNCTGNCCCXCGANTTNXAGATAXNNTCACTTNGAAT
A000078	Ramu Upazila Health Complex (1); Ramu, Cox's Bazar, Chittagong	GXGXAATGTXAGCCTGTGAXATTAGTGCTTAATCATATTXATTACATGCAGAAACAGXXXTTAGCGXCATACCCAAAXTCCXAAACGXTCTCACTXTGGGT
A000080	Naikhongchhari, Baishari BRAC office; Naikhongchhari, Bandarban, Chittagong	AGTXAATATXGATGCGCATXAGXGGTGCTCAGTTACAATXCATTCATGCGGGAGTAGAGATTAGCACXGTAACCAAAGTTCXCAATAXCACCGTTXCGGGT
A000081	Lama Upazila Health Complex; Lama, Bandarban, Chittagong	AGTXAATACXGACCTGTAAXAXGGATACCTTATCTTATCXCTTACGTGAGGAGGTAGAGAXTGATACTGTCCCCCGGGTCAXAAACAXTCCCACTXTGAAT
A000082	Ramu Upazila Health Complex (1); Ramu, Cox's Bazar, Chittagong	XXGXXGXXXXGXXCNXXGTXAXTXGXGCCTAGTCXTAXCXAXTXXXXXXXAAXATXGXXCTTXXCACTXXCXGXXGAXXXNXAAAXXXTAXCACXXXAXXX
A000083	Ramu Upazila Health Complex (1); Ramu, Cox's Bazar, Chittagong	XGGXAGTATXAGXGCGXXTXAXGGGCGCXTAACCXTAXCXCATXCATGCAGAGGCGTGXCCTAAXGATGTCCGXAGGGTTAXAGACAXTCCTACTXTAXGT
A000084	Ramu Upazila Health Complex (1); Ramu, Cox's Bazar, Chittagong	GATXAATACXGATCCGTAAXAXTGGCAGCTXATCTTAACXCATXTATGCAAAAACXGAXCCTAXXACCATAACXAAACTTCXAGACAXCAXCGCTXCXXAT
A000086	Ramu Upazila Health Complex (1); Ramu, Cox's Bazar, Chittagong	GAGXAGCGTXGATGTGXATXAXTGGTAGTCAGTCTTGACXCTTXXXXXXXXXXXXXXXXXXXXXXXXXXXXXXXXAAGTTAXAAACGXCXTCGCTXCAXAT
A000089	Naikhongchhari, Ghumdum BRAC office; Naikhongchhari, Bandarban, Chittagong	AGGXGGTGCXAATGTGTATXAXTGACGGCTTGTCACGTCXCTTTTATAAGAAGATGGGCATTAATACCAAACCTCGACCTCXAAACAXCATCGCTXCGGGT
A000090	Ramu Upazila Health Complex (1); Ramu, Cox's Bazar, Chittagong	GAGXAGCGCXGATGTGTAAXAXTGACACCCTGCTACATCXCATXTATAAAAAGGTGGGXXCTGGXACTGTAACXCGAGTCCXAGATAXTCTCACTXCGXGC
A000091	Naikhongchhari, Ghumdum BRAC office; Naikhongchhari, Bandarban, Chittagong	AGGXGGTGCXAATGTGTATXAXTGACGGCTTGTCACGTCXCTTTTATAAXAAGATGGXCATTXATACCAAAXCTCGACCTCXAAACAXCXTCGCTXCGGGT
A000092	Naikhongchhari, Ghumdum BRAC office; Naikhongchhari, Bandarban, Chittagong	AGGXAACGTXAATGTGTGTXAXTAGCACCTTGTTACGACXCTCTTAAGCAGAGACGTAXACAAGCACCGACCCCCGGCTTCXAGATGXTATTGCTXTAGGT
A000095	Ramu Upazila Health Complex (1); Ramu, Cox's Bazar, Chittagong	AATXAATACXAACGCGCGAXAXTGGCAGCCTGTCTTAATXCTCTCATACGAAGACGGGXCCTAAXGCTGTAAGXAGGCTTAXAAACAXCATTGTTXTAXAT
A000096	Ramu Upazila Health Complex (1); Ramu, Cox's Bazar, Chittagong	GGGXNNTGTXNATGNNTGTXAXTGGTGGNNTATCNCANCXAATXTAAAAGNAGANGNGXCNAGGTNCTNTCCGXANGCNNNXNAATAXCNNNGCTXCAXNT
A000097	Ramu Upazila Health Complex (1); Ramu, Cox's Bazar, Chittagong	GGTXGACATXGATGCGTGTXTXGAACGGCCTACTATAACXATTXCATGCAAAAACGGAXATAGGXACTATACGXCGAGTTCXAGATAXCACTGCTXTAXAT
A000098	Ramu Upazila Health Complex (1); Ramu, Cox's Bazar, Chittagong	AGTXAATGTXGATCCCCAXXAGGGGTACTCAGCTTTGTCXCATTCATGAAAAGGCAGGCACTAGTAATGAAACXCAGGTCXXAAATAXCATCGCTXTAXGT
A000100	Ramu Upazila Health Complex (1); Ramu, Cox's Bazar, Chittagong	AGTXAGTGTXGATCCGTGTXAGGGXTGCCCXGCCTTGACXXAXTCGAACGAAGATGGGXCCTAACGACATCCCCCGGXTTAXAGACGXTACCGCAXCGAGT
A000105	Ramu Upazila Health Complex (1); Ramu, Cox's Bazar, Chittagong	GAXXXGXXXXGATGXXTGTXXGXAXXXGXXXGTXXTXTTXCTTXXAXXCXXXGGTGXXGAXXXATAXCATAXXXXGXGTXXXAGACXXCXXCXCXXTXGXX
A000106	Lama Upazila Health Complex; Lama, Bandarban, Chittagong	AGTXAACGTXGACCTGTATXAGGGGTACCTAGTCTCAATXAATTTXAGAAGAGATGGAXAXAAACACCATCACXAGGGCTAXAGCCAXCCCCACTXCGAAT
A000107	Ramu Upazila Health Complex (1); Ramu, Cox's Bazar, Chittagong	GGGXNGTXNXNATGNNTGTXAXNGGTGGNNNATCNCANCXAATTTAANAGNAGANGNGXNNAGGTNCTNTCCGXANGCNCNXNAATAXCCNNGCTXCAXNT
A000111	Naikhongchhari, Baishari BRAC office; Naikhongchhari, Bandarban, Chittagong	GGGXGGCGTXAACCTGCATXAGTAGCAGCTAGCCACGTCXCATTCATGAAGAAACGGAXCCTAACGCCAACCCTAGACTTCXAAATAXCACCGCTXCGAGT
A000113	Lama Upazila Health Complex; Lama, Bandarban, Chittagong	GGGXAATGTXAACCCGCAAXAGXGGTGGCCTGTTTCATTXAATTCXTACGAAAACGGGXACTAGCACTGACCCCCGAGTTCXAGACGXCATCACTXCGAAT
A000114	Lama Upazila Health Complex; Lama, Bandarban, Chittagong	AGGXAATGTXAATCTGTAAXAGTGATGGCCTGCCATAACXCTCXCXAGCAAAGACGGAXACTGACGCTGTCAXTCAAGTTCXAGATAXCACCGCTXCGGAT
A000116	Naikhongchhari, Baishari BRAC office; Naikhongchhari, Bandarban, Chittagong	GGGXANTGTXAATGTNTGTXAXNGGTGGNNNATCNCANCXAATNTAANAXNAGANGNGGNNAGGNNNTNTCCGNANGCNCNXNAATAXCXNNGCTXCAGGT
A000117	Lama Upazila Health Complex; Lama, Bandarban, Chittagong	AGNXAATANXNANNTGTAAXAXNGNTNNCTTGNCNTNNCXCNNXNGTGCGNAGNTNGNXACTGACACCANCCXXNNNGTNNXANNCNXTCCCNCTXNNGNN
A000118	Ramu Upazila Health Complex (1); Ramu, Cox's Bazar, Chittagong	GGGXGGCGTXAACCTGXATXAGTAGCAGCTAGCCACGTCXCATTCATGAAGAAACGGAXCCTAAXGCCAACCCXAGACTTCXAAATAXCACCGCTXCGXGT
A000121	Ramu Upazila Health Complex (1); Ramu, Cox's Bazar, Chittagong	AAGXGATNTXGNNNNGTNAXAGTAGNNGNTNNTNACNNCXANTXNATNAXNAGNNNGNXACNANCNNTGNAACXNNGNNTCXNAANAXCACCACTXCGXGT
A000123	Lama Upazila Health Complex; Lama, Bandarban, Chittagong	GGTXAGCGTXGATCTCCGAXAGGGGCGCCTTACCTTAATXAATTTGTGAAAAGACAGAGACTGACGATGACCCTAGGGTCAXAAACGXCACTATTXTAGGT
a000125	BRAC (BHP) -Lama; Lama , Bandarban, Chittagong	GGGXAATATXGATGCGTATXTGTAGCAGTTAGTCATATTXCTTTCGAGAGAGGGCAGGXACTGGCGACATCCGXAGAGTTCXAGACAXCCCTGCTTCAGAT
A000126	Ramu Upazila Health Complex (1); Ramu, Cox's Bazar, Chittagong	XGXXAXCXCXGGCNXXCXXXXXTXXXXXXTXXXXXTAXCXXATXCXXXXXAXXXXGXXXXCXXXXNXXXTXXXXXNNXTTAXXGXTXXXXXXNTTXCXXGX
a000127	BRAC (BHP) -Lama; Lama , Bandarban, Chittagong	GGTXAGCGTXGATCTCCGAXAGGNGCNCCTNACCTTAATXAATTTGTNAAAAGACAGAGACTGACGATGACCCXAGGGTCAXAAACGXCACTATTTNAGGT
A000130	Lama Upazila Health Complex; Lama, Bandarban, Chittagong	GGTXNNNNCXNANGCGTATXAGTGGNACCTTGNNNTNANXCATTTXNGAGNNNATNGNGNCNANCNNCNNNNCCANNNNNNXAANCNXNATNACTXCNNNT
A000131	Ramu Upazila Health Complex (1); Ramu, Cox's Bazar, Chittagong	AGTXAGTGTXGGTXCGTAAXAGTGGCACTCTATCTCAACXCATACAAGCGAAGATGTAXACTGGCGACAACACXCGACTCAXAGCCAXTACCGCTXTAGGT
A000132	Ramu Mukti Office; Ramu, Cox's Bazar, Chittagong	GGGXAGTXTXAATGTCTGTXXXTGXTGXTTXATCTCAACXAAXTTAAAAGGAGATGTGGCTAGGCXCTGTCCGXAGGXXCCXCAAXAXCXTCGCTXCAGGT
A000133	Alikadam Upazila Health Complex; Alikadam, Bandarban, Chittagong	GGXXXXCGTXAATGXGXAAXAXTGXTXCTTTXCCXTGATXCXXTTAXXXXAXGATAGAGXCTGXTAXXGAXXCCXXXGTCAXXGACGXXACCXCXXCXAGT
a000134	BRAC (BHP) -Lama; Lama , Bandarban, Chittagong	GGGXANTGNXANCCCGCAAXAXXGGTGGCCTGTNTNATTXNATXNATACGAAGACGGGGACTAGCACTGNCCCXCGANTTNXAGATNXCATCACTTNGAAT
A000136	Lama Upazila Health Complex; Lama, Bandarban, Chittagong	GGGXGNNATXNNNCCCTNTXAGGNGNGCCTNGCCTTNTNXNNNTNXTNCAAANACATACACNGNCNCCANNACCAGNGTNAXANNCGXCANCNNTXCAAGT
A000137	Alikadam Upazila Health Complex; Alikadam, Bandarban, Chittagong	GGTXAGCGTXGATGTGXGTXAXTGGCGCCTAGCCATAATXAATTCATGCAAAGGTGGAXACTGGCACCGTACCXAGACTCCXAGACGXTACCACTXCAGGT
A000139	Lama, Soroi Union, AKOTA Office; Lama, Bandarban, Chittagong	GGTXAATGTXGACCCGTAAXAGTGGTACTTTATCTCGACXCACATXAGAAAAGATGGAXACTGGCGACATCCCCCGGCTTAXAACTAXCACCACAXCGGAC
A000140	Alikadam Upazila Health Complex; Alikadam, Bandarban, Chittagong	AAGXAATGTXGGTCTGTGTXAGTAGTGCTTTGCTTCATCXATTTCGTGAAAAAATGGAGCTTXATACCGACACCCGGGTTAXAAACGXCACCGTTXCGGGC
A000141	Lama Upazila Health Complex; Lama, Bandarban, Chittagong	GGTXAXTXTXGACXTXCGAXATTXXXGNCXXATXTTAATXAATTTGNGXXXXGXXXGXXXXXXXCNXXXAXXCXAXXGXXXXXXXXXXCAXXXXTXTAXGT
a000143	BRAC (BHP) -Lama; Lama , Bandarban, Chittagong	AGXXAXNXCXXAXNTXXAAXTTXAGTAXXXNAXNTXXXXXCTTTTAXXCXAGGXXGGGXATTGGXNXCAXCACXAGGNTXXXAAAXAXNCXCXCANTXGAT
A000147	Lama, Soroi Union, AKOTA Office; Lama, Bandarban, Chittagong	GGTXANCNTXGNNNNGNNTXAGTNNTGNCNNGNCNCNACXCNNNNGNNCANANNCNNNCACNGNNNNTATNCCNCGNNNTNXAAANNXNANNNCTXNNGGN
A000151	Naikhongchhari, Baishari BRAC office; Naikhongchhari, Bandarban, Chittagong	GGGXNATNTXGNNGCGTATXAGGNNTGGCNTNTCNTNTCXAANNNANGNAAAGNNGNNXNCNGNTNNTAANCCXNNAGTNNXAGCTNXNCCCGCTXCAAGN
A000154	Alikadam Upazila Health Complex; Alikadam, Bandarban, Chittagong	AGTXAGCATXGACGTGTAAXAXTAACGGTTAGTCACATCXAATTTATAAGGAGACGTGXCCTAGCAACATCAGCCGGCCTAXAAACGXTACCGCTXCAAGT
A000155	BRAC (BHP)-Ruma; Ruma, Bandarban, Chittagong	GNTXGANANXGATNTGTGTXATTGNNGCTNAGNNNNNANXCTTTNATANGNNGACATGXCCTXACGNNATAACNAGGGTNAXAGATNXNATTANTXCNAGT
A000156	Alikadam Upazila Health Complex; Alikadam, Bandarban, Chittagong	NNGXANTNTXNANNTNNNXXTGGNGCGGNCTGCCNNNATXCNTTTANNNGNNAANNNAXNCNAGNAANANCAGTNNAGNNNXANACGXCCNTGNTXNNAGN
a000157	BRAC (BHP) -Lama; Lama , Bandarban, Chittagong	GGNXAATGCXNATCCGCAAXAGGNGTNNNCTGTCACATNXCATXTATANAAANACGGNXANAGNCGCTATCACXCAAGTTNXANANNXNATCACTTNGGAT
A000158	Lama, Soroi Union, AKOTA Office; Lama, Bandarban, Chittagong	GGTXAGTATXANNGCGNAAXNTTGGTGCCTAANCATATTXCTNTCXTACAGANATGGAGACTGGCGATGNAACNNGGCCTNXAAACAXCACTGNTXCGANT
A000161	BRAC (BHP)-Ruma; Ruma, Bandarban, Chittagong	AGGXAGCATXGATCTGXGAXAXGAGTGGTCTGTCACGTTXATTACAAACAGAGATGGAXACAGATACTATAAGCAAACTCAXAAACGXCCTCACTXTAAGT
A000165	Lama, Soroi Union, AKOTA Office; Lama, Bandarban, Chittagong	GAGXAGTATXGACGCGTGAXATTNGTGNCTTNNCNCATCXCTNANXTNCGAGGNCGTAXAXTGGTACTATNACXCAGNNTCXAGATAXCCCTANTXCNGGT
a000170	BRAC (BHP) -Dighinala; Dighinala, Khagrachhari, Chittagong	GATXAATACXGACGCGTGTXAGGGACGGCCAGTCATAACXCTTXCATGAAGAGACGGAXACTGAXACCATCCCXCGACTCAXAAACGXCCCCACTTTAXGT
a000172	Chittagong Medical College Hospital; Panchlaish, Chittagong, Chittagong	GGNXGXTACXXATGTCTAAXXTGANXXGCTNATNTCAXCXCXTXNANGNGGXAGXAGAGACTGACGCCATAAXXCGGGXTXXAAATNXTAXCXCTTCGAXT
a000177	Kubbang Brac Office; Barkal, Rangamati, Chittagong	GGTXAGCGTXAATXTCTGTXATGGGTAGCCAGTTTCATTXCTTXTATGCAAAGACAGAXATTGAXGCCATCXGXCGAGTTAXAGACAXTACCGCTTTGXGT
a000187	Matiranga Upazila Health Complex; Matiranga, Khagrachhari, Chittagong	GGTXAACATXGGCGCGCAAXATGGGTGGCTTGTTACGATXCATXCAAGAGAAAACAGAXACAGGCACXAACXCXCAGGTCXXAGACGXCCTCGCTTTAXGC
a000188	Chittagong Medical College Hospital; Panchlaish, Chittagong, Chittagong	AGGXAACGCXGATCTGCATXTGTAACAGCCTATTTTAACXCTTTTAAGCAAAGATGGAGATTGGTAACGTCACTXAACTTAXAAACAXCCTCGCATCAGGT
a000190	Matiranga Upazila Health Complex; Matiranga, Khagrachhari, Chittagong	GGTXAACATXGGCGCGCAAXATGGGTGGCTTGTTACGATXCATTCAAGAGAAAACAGAXACAGGCACXAACCCXCAGGTCCXAGACGXCCTCGCTXTAXGC
a000193	Chittagong Medical College Hospital; Panchlaish, Chittagong, Chittagong	GGGXAATGCXAATGTCTGTXATGAGTACTTAATCTTGACXAATTTATXAGAAGACAGGGCTAGGTACXATCCCCAGGGCTCXAAATAXTCTCGCTTCGGAT
a000195	Chittagong Medical College Hospital; Panchlaish, Chittagong, Chittagong	GGGXGGTGCXGATGTCTATXAGTAGCACCTAATTTTAACXCTTTCAAACAGAAACGGGGACAGGCGATXTCACCAAGCXTCXCAACGXCATCGCTTCAAGC
a000196	Chittagong Medical College Hospital; Panchlaish, Chittagong, Chittagong	GGGXAGTATXAATCTCCGAXAGTAGCAGCCTATCATATTXCATTTAAACGGAAGCGGGGACAGACGACGTCCCXAGGGTTCXAGACGXCCTCGCTTCAAAT
a000197	Chittagong Medical College Hospital; Panchlaish, Chittagong, Chittagong	AGTXAATACXGACCTGTATXATTAGTAGCCAGCTTCAACXCATTTGAGAAAAGGCGGAGACTAGCACCGTCACCCGAGTTCXAAATGXTCCTACTTCGAGT
a000201	Chittagong Medical College Hospital; Panchlaish, Chittagong, Chittagong	GAGXAGTATXGACCCGCAAXATTGGTACCTTATTACGTCXCATXTATACAAAGATGTGXATTAAXACTATACCXAAGGTTCXAAACGXTCCTGCTTCAXAT
a000203	BRAC (BHP) -Lama; Lama , Bandarban, Chittagong	GAGXAATATXGATCCGCGTXATGAGTACCTTACCTCGACXCATXTAAACAGGAGCGTGGCCTGGCACTAAACGXAGAGTTCXAAATAXCATTGCTTCGGGX
A000208	Ramu Mukti Office; Ramu, Cox's Bazar, Chittagong	GANXGATATXAGCNTGTNTXAGGGAXGXCCXXTCANANNXXNXACATGCGGGGANATAXXNTGACAXCAAAXCCANGCTCNXANACAXCCCTACTXNGANT
a000210	Matiranga Upazila Health Complex; Matiranga, Khagrachhari, Chittagong	NNTXGACNTXGACNNNCGAXTXNNGTNCCNNGCNNCGTCXAATXCGTNCGGAGNCANGXCNAANXNATANCXCXCAGCNTNXANATAXCANNNNTTCGXNT
A000212	Naikhongchhari, Ghumdum BRAC office; Naikhongchhari, Bandarban, Chittagong	GGTXAATGCXAATCTGXGTXTXXAGCGGCCTATCACATCXAATTTAAAAAGAGACAXGXACTAACGCCATCAGCAGGGTCAXAAATGXCACTGTTXTAXGT
A000215	Ramu Mukti Office; Ramu, Cox's Bazar, Chittagong	AGGXAGTGTXGATCCCXATXTGTAXTXGCCAGTCACGACXXACATGTGAGAAGGTGGAXACTGACGCCATCCCCCGAGTCAXAAATAXCCTCGCTXCGAGC
a000216	Chittagong Medical College Hospital; Panchlaish, Chittagong, Chittagong	AGGXAATATXGGCGCGCATXATTGATAGCTAGTCTTAATXCATXTATACAGGGATAGGXACTAACACCGTCCCTAGAGTCAXAGACAXTACTGCTTTGXGT
a000218	BRAC (BHP) -Lama; Lama , Bandarban, Chittagong	GGGXAATGCXAACCCGCATXAGXGGTGGCCTGTCTCATTXAATXCATACGAAGACGGGGACTGGCACTGACCCXCGACTTAXAGATAXCATCACTTTGAAT
A000221	Lama, Soroi Union, AKOTA Office; Lama, Bandarban, Chittagong	GGGXNGTGNXNACCCGCATXAXGNGXNNCCTGTCTCANNXNATXNXTAAGAAGACGNGXACTGGCNCCATCNCTCGNNTTAXANANAXNATCACTXTNAAT
A000222	Ramu Upazila Health Complex (1); Ramu, Cox's Bazar, Chittagong	GGTXGACATXGATGCGTGTXTXGAACGGCCTACTATAACXATTXCATGCAAAAACGGAXATAGGXACTATACGXCGAGTTCXAGATAXCACTGCTXTAXAT
a000224	Chittagong Medical College Hospital; Panchlaish, Chittagong, Chittagong	AGTXNGTGTXGACNTCTAAXNXTGNCAGCNNGTTATAATXATTTNATAAGNGGANGGGGACTGGCACTAAACCCAGAGTTCXANCCAXCNNCGTTTTGAAT
a000226	Matiranga Upazila Health Complex; Matiranga, Khagrachhari, Chittagong	GATXAATXCXGACXXGTGTXTXXGACXGCCAAXTTTAXXXCXTXXATXAXXGGATGXAXXXTXAXAXCATXXCCCGAXTCAXAGACXXCCCCACTTCXXGX
a000228	Chittagong Medical College Hospital; Panchlaish, Chittagong, Chittagong	GGTXGGTGTXGATGTGTATXAGTAGTAGCTTGTCTTATTXCATTTATGCAAAGGTGGAGATTGATGCTGACCCCAGAGCTAXAGACAXCCCTGTTTCGAAT
a000229	Chittagong Medical College Hospital; Panchlaish, Chittagong, Chittagong	GGGXAACGNXGATNNGTNTXNGNGNNACCNNANNANANCXNNTTNANAAANGNACGTAXACTGGCGATGTCNGXNGAGTNNXAAANAXNATCACTXTNAGN
a000230	Chittagong Medical College Hospital; Panchlaish, Chittagong, Chittagong	GGTTAACGTXGACCCGCATCXGXXXTAXTTXGXTACXACCXAXXTGTAAAAXGGCAXXXATTXGTGCCGACCCXXGGGXTATXACTAAXAXXXCTATAGAT
a000231	Chittagong Medical College Hospital; Panchlaish, Chittagong, Chittagong	GGTXGGTGTXGATGTGTATXAGTAGTXGCTTGTCTTATTXXATTTATGCAAAGGTGGAGATTGATGCTGACCCCAGAGCTAXAGACAXCCCTGTTTCGAAT
a000232	Chittagong Medical College Hospital; Panchlaish, Chittagong, Chittagong	GGTXGGTGTXGATGTGTATXAGTAGTAGCTTGTCTTATTXCATTTATGCAAAGGTGGAGATTGATGCTGACCCCAGAGCTAXAGACAXCCCTGTTTCGAAT
A000233	Ramu Mukti Office; Ramu, Cox's Bazar, Chittagong	GGGXANTGNXAATGNGTGTXAXNGXTGXTNXATCNCANCXAAXTTAAAAGGAGANGNGXNNANGTNCTATCCGTANGCNNNXNAATAXCANCGCTXNAGNT
A000234	Ramu Mukti Office; Ramu, Cox's Bazar, Chittagong	AGGXAGCGTXGACCTGXATXAXTGGTGCCTAATTACATCXXATTCAAGAAGGGACGTGXACTGACACCATCACTAGGCTCAXAAACAXCXCCACTXTAAGT
A000236	Alikadam Upazila Health Complex; Alikadam, Bandarban, Chittagong	GGTXAGCGTXGATGTGXGTXAXTGGCGCCTAGCCATAATXAATTCATGCAAAGGTGGAXACTGGCACCGTACCCAGACTCCXAGACGXTACCACTXCAGGT
A000238	Ramu Upazila Health Complex (1); Ramu, Cox's Bazar, Chittagong	AGGXANCGNXGANCCGTAXXAXGANTGNCNAACCNTGACXCATXCATACAGAGACGGAXCCTNAXGATGTACGXXAAGTCAXANATGXCACCATTXNAXAT
A000239	Ramu Mukti Office; Ramu, Cox's Bazar, Chittagong	GGGXXATGTXAATCCGTGTXTXGAXTXCCCTATTATATCXAAXTTGTGAGAAGACGGAXACTGACACCGTCCCCAGAGCTAXAGCTAXCXTTACTXTAAGT
a000254	BRAC (BHP) -Dighinala; Dighinala, Khagrachhari, Chittagong	GGTXAACGCXAACGCGCGTXATTAGCAGTTAACCTCATTXCATXCATXAGAAGGCGTAXCTAGGCGCTATCCCXAGAGCCAXAAATGXTCCTGTTTCAXGT
a000256	Sajek Brac Office; Baghai Chhari, Rangamati, Chittagong	AGTXAATATXGGCCTGCGTXAGGGACGCCTAGTTTTATCXATTATATGCGGAGATAGAXCTTAGTGCTGTCACXAAAGCTAXAGACAXTCTCATTTCGGGT
a000265	BRAC (BHP) -Dighinala; Dighinala, Khagrachhari, Chittagong	GGNXGGTGTXNACNCGTNTXATGGGTANCCTACCACGTNXAACTTATAAGGAGNTANNXATTGNCGCTATCACCCAAGTTAXAAATAXTNCCACTTCGGGT
a000266	BRAC (BHP) -Dighinala; Dighinala, Khagrachhari, Chittagong	GGTXAATATXAGTCCGCGTXTGTGGTGCCTTACCACAACXCTTXTGAACGAGGGCGGAXATTAAXGCCGTCCCXAGGGTCCXAAATAXTCCCATTTCGXGC
a000270	BRAC (BHP) -Dighinala; Dighinala, Khagrachhari, Chittagong	XGXXNXTGTXXXCNXGTATXATGGGXNNXCTGCTTXXTCXCATTTNTACXXAAGXAXGXXCXXGXXCTXTXXXXXXXXTXAXAAXTXXXATTNTXTXNXNX
a000271	Sajek Brac Office; Baghai Chhari, Rangamati, Chittagong	GGTXAATATXAACGCGTATXATTGGTGCCCTATCATATCXCTCTCATGAGAAGATGGGXCTTGGCGCCATCACXCGAGCTAXAAATAXCACTAXTTTAAGT
a000282	Sajek Brac Office; Baghai Chhari, Rangamati, Chittagong	GGNXAATGNXNACCCGNATXATNAGTNNCNTGTNATNNNXNANTCNNNAANANANGGNXNCAAACANCGTACNXAGNCNCNXANNCNXNANCGNTTNGGGT
a000283	Sajek Brac Office; Baghai Chhari, Rangamati, Chittagong	XGXXAGCXCXGXCCCGNAAXXTXNGTNCTNTNTTTTXXCXNANTNAXGCAXAAXXGXNXNCXXAXAATXXNXXXAGXXXXAXXAATXXXATCGTXTXXXGX
a000285	BRAC (BHP) -Dighinala; Dighinala, Khagrachhari, Chittagong	GGTXAATGTXAACGCGCAAXATGGGCGCCCAACCATAACXCTCXTAAGCAAAGACAGGXCCAGGCGCCATCACXCGGGCCAXAAATGXCATCGTTTTAXGT
a000289	BRAC (BHP) -Dighinala; Dighinala, Khagrachhari, Chittagong	GNTXAATGTXGANGTNTNTXNXTGGTGNCTNGNCTTGANXNATXNATGAAGNNNCNGAXNCNGACANCNTCCCXAGNGNNNXANATNXNATCGNTTCAXGT
a000295	BRAC (BHP) -Dighinala; Dighinala, Khagrachhari, Chittagong	GGGXAATATXGACCCGTAAXATTAGCAGTTTATCTCAATXCTTXCATGAGGGGATATAXCCTAGTGCTAAACCXAAAGTTCXAGACGXTACCACTXCGXAT
a000296	Baghaichari Upazila Health Complex; Baghai Chhari, Rangamati, Chittagong	XAXXXXTXCXGGXXXXTXAXXTTGGXNXTXANXCAXGXXXCXXTNXTXAGGXGAXGTNXXXXXGXNXXXXCXCXXXXGTCAXXGATAXXXTXXCTTTXXXX
a000300	Baghaichari Upazila Health Complex; Baghai Chhari, Rangamati, Chittagong	AGTXXXTXXXGXCCCCXXAXXTXXXXAXCTTGTTXTGXXXCATXTATXCGXXAXXGXAXXXXNXXAXXGTXXCXXXXGTXXXXAATXXCXXCXXXTXAXXX
a000301	BRAC (BHP) -Dighinala; Dighinala, Khagrachhari, Chittagong	ANNXANTNNXGNNNCGTATXATTAGNGCNNTNNNNCANNXNANXNNTGNGNNGACGGGXANNANTNNCGNCNCXNGNGTNNXANNNNXCNTCNCNTTNXNN
a000302	Matiranga Upazila Health Complex; Matiranga, Khagrachhari, Chittagong	GGGXGACATXAACGTGTAAXAXTAGCAGCTTGTTATAATXAATXTGAAAAGAGGCAGAXCCTAGXACTGTACCXCGACCTAXCGACGXTACTACTTCAXGT
a000306	Sajek Brac Office; Baghai Chhari, Rangamati, Chittagong	GGGXANNACXAACNCGCNAXTTTGGTGNTTTGTCTCATCXCNCXTGAAANNGGATGGAXACAANTAATAAAACXCGAGCTAXCANTAXNACCACTXCNAGT
a000307	BRAC (BHP) -Dighinala; Dighinala, Khagrachhari, Chittagong	NNGXANTNCXNACNCGTATXATTANTGCCTTGTNNCAANXNACXNNNNAGGNNANGGAXACAANCACCNTNAGXCGNCTTNXAAANAXCNCNGTTTCNXAT
a000308	BRAC (BHP) -Dighinala; Dighinala, Khagrachhari, Chittagong	GGTXAATATXAGTCCGCGXXXXXXXXXXCXXXXCXXXXXXXXXXTGAACGAGGGCGGAXATTAACGCCGTCCCXAGGGTCCXAAATAXTCCCATTTCGAGC
a000309	Sajek Brac Office; Baghai Chhari, Rangamati, Chittagong	NGNXNNNNTXNNNCCGCNTXAGTNGTGNCCTGTCNTNTNXANNXTNNANGNAGNTNGNXNCNGNNNCTGNNACXANGNNCNXANNNNXCNNNNNTTCGXGT
a000311	Sajek Brac Office; Baghai Chhari, Rangamati, Chittagong	AGXXAATGTXGACXXGCATXATGGXXXCXTTGTXTXXXCXXTXTCGXXCGXGGXTAXAXCCTGGTGCXGTXXCXXAAGXTXXAAACXXTATCATTTTGXGT
a000312	Sajek Brac Office; Baghai Chhari, Rangamati, Chittagong	GGTXAGCATXGACCCCTGAXATTGACGCCTAGTCTCGTTXCTTACAAGCGAAAATAGAXACTGATACTGTAAGXCGACTTAXAGATGXCACCGCTTTGXGT
a000317	Sajek Brac Office; Baghai Chhari, Rangamati, Chittagong	GGGXGGTATXGACCCGCGTXATTAGCACTCTACTATGATXATTTCGTGAAAAGATGTGXCCTGGTGCTAACACXAGACCTAXAGATGXTATCGCTTCGGGT
a000323	Sajek Brac Office; Baghai Chhari, Rangamati, Chittagong	GGTXAGCGTXGATCCGCGAXAGTGGTGCCCAGTCTTAATXCTTTTGTACAGAGGTGGAXACTGACAXCGTAACXAAAGTCCXAAATAXCACCGCTTCGAGT
a000326	Baghaichari Upazila Health Complex; Baghai Chhari, Rangamati, Chittagong	GGTXGGTGTXGACNCGTNTXTXGGGTANCNTGCCNCNTNXNNCXTATNAGNAGNTANNXATAGNCGATATCACCNNACTTAXAAATAXTACCGCTXNNGNT
a000329	Sajek Brac Office; Baghai Chhari, Rangamati, Chittagong	AGTXAGCGTXGACCCCTATXAGXAGCAGCTTGTCATGTCXCATTTATGCGAAGACGGAXACTGGCACCGTCACXCGGCTTAXAAATAXCACCACTXCAXAT
a000335	Sajek Brac Office; Baghai Chhari, Rangamati, Chittagong	AGGXAGTGTXGATCCGTGTXATTAGTGGCTTATTATGTCXCATTTGAGAAAAAAXATAXATTAACGCTGTAACXAAGGTTAXAAACGXTATCACTTTAXGT
a000344	Sajek Brac Office; Baghai Chhari, Rangamati, Chittagong	AATXAGCGTXAACCTGCATXTGTGGCGCCCTGTCATATCXCATTCATGAGGAGATGTAXCCTGGCGCCAACACXAGGGCCCXAGACAXTATCGCTTTGGGT
a000352	Dulyatali BRAC Office; Lakshmichhari, Khagrachhari, Chittagong	AATXGGTGTXAACCTGTATXTTGGGTGCTTAGCCATGACXCATTTATAAAGAAGTAGAXACTGGCACCGTCACXCGGGTCAXAGATAXTATCGCTXCGGGT
a000354	Sajek Brac Office; Baghai Chhari, Rangamati, Chittagong	GGGXGACGCXAACCCGTATXAGTGGCAGCCTGCTACGATXCATATATGAAAAGATGGGXACTAATGCTAAAACCCAGCTCCXAAACGXTATTGCTTCAGAC
a000355	Sajek Brac Office; Baghai Chhari, Rangamati, Chittagong	GGTXAGTGTXAACGCGTATXATGAACAGTCAGCCTTAATXCTTXTATACGAAGACGGGXACTGATAATAACCCXAAGCTTAXAACTAXTACCGCTTTAXGT
a000363	BRAC (BHP) -Dighinala; Dighinala, Khagrachhari, Chittagong	GGTXANTNNXGANNCGCATXATGNNTGGCTTGTTATNACXNATXCGTAAAAAAACGGAXCCAAAXACCGTAAGXANACNNNXANACAXNANNANTTNNXGT
A000365	Lama, Soroi Union, AKOTA Office; Lama, Bandarban, Chittagong	XGXXXXXACXGXXGXGXATXANXNXXNGCXAGXXTXGAXXNATXCXXGXXXAXXXXNXXNCAXGTGACXXAXXXAAGXXXXXXXXCXXXXXXGTXXXAXAX
A000366	Lama, Soroi Union, AKOTA Office; Lama, Bandarban, Chittagong	GGNXANTGCXGNNGCNTATXAGGAGCNGCTTGNCNTNNCXNNTANGTGNGAGGATGTAXACNAACGCCANCCGTAGAGNTNXCGACAXCCCTGNTXTAGAT
a000367	BRAC (BHP) -Dighinala; Dighinala, Khagrachhari, Chittagong	AGXXAGTGTXAACCCGTATXAGTGGTGCCCTACCTTGTXXCXTXTATXCGAAAATGXAXATTAACGCTATACCXAAACCCCXAACCAXCATCACTTTXXGT
a000368	BRAC (BHP) -Lama; Lama , Bandarban, Chittagong	GGGXNNNNNXGNTNCGCNNXATNNGNNNCNNNNNTNGNTXCATXNANACANAGACGGAGACTGANNNTGNNANXNGNNNTAXAGANAXNACCNCTTNAAGT
A000370	Lama, Soroi Union, AKOTA Office; Lama, Bandarban, Chittagong	XGGXXGXXCXXXCCXCXXXXXXXXXXXXXXAACXTXXTXXXXTXXXXXXGXXAXXXXGXCXTGACXATXXXXXXXXXGXXXXXXACGXXCXXXXXXXXXGX
a000371	BRAC (BHP) -Dighinala; Dighinala, Khagrachhari, Chittagong	NGTXANNATXAGTCCNNGTXTGTGGTGCCNTACCACAACXCTTXTGAACGANGGCGGAXATTAACGCCGTCCCXAGGGTCCXAAANNXTCCCATTTCGXGC
a000374	BRAC (BHP) -Lama; Lama , Bandarban, Chittagong	GGGXAGCATXGGTCCGCGAXATGAGCGCCCTACCTCGATXCATATATACAGAGACGGAGACTGATACTGTACCXCGACCTAXAGATAXCACCGCTTTAAGT
a000378	Sajek Brac Office; Baghai Chhari, Rangamati, Chittagong	GNTXANCGTXNATGNGTNAXTGGGACNGCTTGTCNTGTCXCATXTATACGGGGACGGGXCCTAGXAATGTACCXCNNGTTAXAAANNXCANCGCTTCAXGT
a000379	Baghaichari Upazila Health Complex; Baghai Chhari, Rangamati, Chittagong	GGTXGGTGTXNACNCGTNTXTXGGGTANCNTGCCNCNTNXNANXTATNAGNAGNTANNXATNGNCGATATCACXNNACTTAXAAATAXNNCCGCTXNNGNT
a000380	Sajek Brac Office; Baghai Chhari, Rangamati, Chittagong	AATXAGCGTXGACCCGCGTXATGGNTNCCTNGTCNTATCXNTNTNATNAAAANATNGAXCNTAGCNATATACNXCGGGTNCXAAATNXNANCGCTTTAXNT
a000382	Sajek Brac Office; Baghai Chhari, Rangamati, Chittagong	AAGXXACACXAGCGTGCAAXATTAGXGGCCTXTCXTGTTXCTTTCATGAGGAGACAGAXACTGAXXCCXTCAXXAXACTTAXAXATGXTATTACTXTGXGT
a000383	Sajek Brac Office; Baghai Chhari, Rangamati, Chittagong	AATXAATGTXAACGCGTGAXAGTAGCGCCCAGTTACGTCXAATXTAAAAGGAAATGTAXACAAACGCCGAAACXAAGGTTAXAGACAXCCCCGCTTCGAGT
a000384	Sajek Brac Office; Baghai Chhari, Rangamati, Chittagong	GGTXGGTGCXAACGTGCATXAGGGGCGCCTAACTTCAACXCACTTATGAAAAGATAGAXATTGATGATATACGXCGGGTTCXAAATAXCATCACTXCAGAT
A000388	Lama, Soroi Union, AKOTA Office; Lama, Bandarban, Chittagong	GGGXNGTATXNNTCTGCANXNGTNGTACNTTANCANNTCXCANXNGTACAGAGNCGNAXNCTANTNCTANCCGXANNGTTCXCAANAXNCNNNNTXTGGGT
A000394	Lama, Soroi Union, AKOTA Office; Lama, Bandarban, Chittagong	GGGXAGTGTXANCGCGCATXAGXGGTGGTCTGTCATATTXAATXNXTAXGAAAACGGGXAXTGACNCTGACCCTAGANTTAXAGATAXCCTCACTXNGAAT
a000395	Sajek Brac Office; Baghai Chhari, Rangamati, Chittagong	GGTXAATGTXAACXTGTAAXTTGAGTACCCTATTTTATCXCATTTAAAAAXAXATGGGXACTAGTGXCGAAACTAGGCTTCXAGCCAXCACTGTTTCGAAT
a000397	Sajek Brac Office; Baghai Chhari, Rangamati, Chittagong	GGTXAGCGTXGGCCCGTAAXATGGGCGGTTTGTTTTATCXCATTCAAACGGAGACATAGATTAATGCCGTCACCAGGCTTAXAAATGXTACCGCTXCAGGT
A000402	Lama Upazila Health Complex; Lama, Bandarban, Chittagong	GXGXXGTAXXXACCCGTAAXATXXGTGXTTTATCATAXXXCTXXTXXACAAAGGTGGAXACTGGCGCCATACXXAGGGTTAXCGACAXCACCACTXCAGGT
a000416	BRAC (BHP) -Dighinala; Dighinala, Khagrachhari, Chittagong	AATXGGTACXAACGTGCAAXTTTAGCGCCTAGTTACAACXCTTTTAAACAGAAATGTAXACTAACACTGTCAGXCGGGTCCXAAATAXCCCCACTTCAXAT
A000417	Lama, Soroi Union, AKOTA Office; Lama, Bandarban, Chittagong	AGGXAGTATXGACCTGTXAXAXGGATGCTCAGTCTTAATXCATTTATGCGGAAACGGGXACAGACACTAACCCCCGACTTAXAAACGXTCCCGCTXTAGGT
A000418	Lama, Soroi Union, AKOTA Office; Lama, Bandarban, Chittagong	AGGXAATGTXAATCTGTAAXAGTGATGGCCTGCCATAACXCTCXCXAGCAAAGACGGAGACTGACGCTGTCACTCAAGTTCXAGATAXCACCGCTXCGGAT
a000419	BRAC (BHP) -Dighinala; Dighinala, Khagrachhari, Chittagong	GGTXAATACXGACCCGCATXATTAATGGCTTGTTATGACXAATXCGTAAAAAAACGGAXXCAAAXACCGTAXGXAAACCTAXAAACAXCATCATTTTGXGT
a000420	BRAC (BHP) -Lama; Lama , Bandarban, Chittagong	GGGXGXTGCXGATGCGCATXATTGGTAGCTAGTTTTGTTXCATTXAAACAAAGACGGAXACTGACGACGACAGXAGGGTTAXAGACAXTACCACTTCAAGT
A000421	Lama, Soroi Union, AKOTA Office; Lama, Bandarban, Chittagong	AGGXAATGTXAATCTGTAAXAGTGATGGCCTGCCATAACXCTCTCXAGCAAAGACGGAGACTGACGCTGTCACTCAAGTTCXAGATAXCACCGCTXCGGAT
A000422	Lama, Soroi Union, AKOTA Office; Lama, Bandarban, Chittagong	GGGXAGCGTXGATCTXCGAXAGGAGCGCCCTACCTTAATXCATTTGTAXAAAGATAGAGACTGACGATXAXCXXAGGGTCAXAAACGXCACCAXTXTAAGT
A000425	Lama Upazila Health Complex; Lama, Bandarban, Chittagong	GGTXAATATXGGCGCGTATXATGGGCGGCTTGXCTTATCXCTCXTGTACGGAGATGXGXACTAGCGACATCACTCGGCTTCXAAATGXTAXCGTTXTAAGT
A000427	Lama Upazila Health Complex; Lama, Bandarban, Chittagong	GNGXAANNNXGANNTGNNTXANNGNNNCCNTGNNTNNANXCNTXTXTNAANANANNNNXACNGNCNCCANNNCXNNANTNNXANNCNXNNNTNNTXNNNNT
A000428	Lama, Soroi Union, AKOTA Office; Lama, Bandarban, Chittagong	AGGXAGTATXGGTCTCTAAXATGAGTACCTTGCCTTAACXCATTTXAAAAAAAGTGTAXACAGGCACTGTCACTCGGCCTCXAAACGXTCCCACTXTGAAT
a000430	BRAC (BHP) -Lama; Lama , Bandarban, Chittagong	GGGXAGCATXGGTCCGCGAXATGAGCGCCCTACCTCGATXCATXTATACAGAGACGGAXACTGATACTGTACCXCGACCTAXAGATAXCACCGCTXTAAGT
A000432	Lama Upazila Health Complex; Lama, Bandarban, Chittagong	GAGXGATATXAATGTGTGTXAGTGGTAGCTAATCTTATTXCATXTXAGCGAAGAXATAXACTAATACTGTCCXXAAAGTCCXAAATGXCCTCGCTXTGAAT
A000433	Lama, Soroi Union, AKOTA Office; Lama, Bandarban, Chittagong	AGTXGGTGTXGACCCGCAAXATGAGCGGTCTGCCACATCXAATTTATACAAAAGTAGAXATTGACGCCATCXCXCGGGCTAXAAACGXCACCACTXCGGGT
A000434	Lama, Soroi Union, AKOTA Office; Lama, Bandarban, Chittagong	ANGXGATACXAATGCGTATXAGTGGTGGCCTGCTNCAXCXNATATAAGAAAAGATGGAXACTAAXGNTATACCCCGGGTTNXAAACAXTCCCGNTXTNXNC
A000438	Lama Upazila Health Complex; Lama, Bandarban, Chittagong	AGGXAATATXGATGTGCATXATTGACGCTTTGCCTCAACXCATXTXTGAAGAGACGGAGACTGGCGCCATACCCAGACTCCXAGCCAXTCCCGCTXTGGGT
a000439	BRAC (BHP) -Lama; Lama , Bandarban, Chittagong	AGGXAATGTXAATCTGTAAXAGTGATGGCCTGCCATAACXCTCTCAAGCAAAGACGGAGACTGACGCTGTCACTCAAGTTCXAGATAXCACCGCTTCGGAT
a000441	BRAC (BHP) -Lama; Lama , Bandarban, Chittagong	XAXXGNCGCXGXTXXGXAAXTTXGGTXXCXXGCCTCGXXXCXTTCAXGCANXAGXGXGXXXXAATGXNNTXCCXXGGGXTXXCXXTGXXAXTATXTCXXXX
a000442	BRAC (BHP) -Lama; Lama , Bandarban, Chittagong	GAGXAGTATXGACCCGCAAXATTGGTACCTTATTACGTCXCATATATACAAAGATGTGGATTAACACTATACCXAAGGTTCXAAACGXTCCTGCTTCAAAT
A000444	Lama, Soroi Union, AKOTA Office; Lama, Bandarban, Chittagong	AGTXNGTNTXGACCCGNAAXANGAGCGGNNTGCCACATCXANTXTXTACAAAAGTANAXAXTGACGCCATCNCXCGGNCTNXAAACGXCNCCACTXCGGGT
A000445	Lama, Soroi Union, AKOTA Office; Lama, Bandarban, Chittagong	AGGXANTGTXNATGTGTAAXNTTGGTGNCTNGTCTTGACXNTCTNGTNCGAAGACGGGXACAGACACNGAAACCANNGTTCXAAACGXNNCTNCTXCAGAN
A000446	Lama, Soroi Union, AKOTA Office; Lama, Bandarban, Chittagong	GGGXAATGCXAACCCGCAAXAXXGGTACCCTGCTTTATTXAATXTXTACGXAGACGGGXAXAAGCACCGACCXTCGAGTTAXAGATAXTATCACTXTGAAT
A000447	Lama, Soroi Union, AKOTA Office; Lama, Bandarban, Chittagong	AGGXAATGTXAATCTGTAAXAGTGATGGCCTGCCATAACXCTCXCXAGCAAAGACGGAXACTGACGCTGTCACXCAAGTTCXAGATAXCACCGCTXCGGAT
A000449	Lama, Soroi Union, AKOTA Office; Lama, Bandarban, Chittagong	AGGXAATGTXAATCTGTAAXAGTGATGGCCTGCCATAACXCTCXCXAGCAAAGACGGAXACTGACGCTGTCACTCAAGTTCXAXAXXXCACCGCTXCGGAT
A000450	Lama, Soroi Union, AKOTA Office; Lama, Bandarban, Chittagong	AGGXAGTACXGACCTGTNAXAGGGNCANTCTGTCNCAANXCATXNXTGCGGAGNTGGGXNCAGACGCTAANCCCCGNCTTAXAAACNXNNTCGNTXTAGAT
A000451	Lama Upazila Health Complex; Lama, Bandarban, Chittagong	GGGXGATGTXGANNCGTNAXATTGGTGNNCTGCCNTGACXCNTTTXNAAAAAGGCNGGCACAANTACTGTCNCCCNAGCTCXCAATGXNACCGNTXTNAAT
A000452	Lama, Soroi Union, AKOTA Office; Lama, Bandarban, Chittagong	AGGXAATGTXAATGTGTAAXATTGGTGGCTTATCTTGACXCTCTCXTGCGAAGACXGGXACAGACACTGAAACCAAAGTTCXAAACGXTCCTGCTXCXGAT
a000454	BRAC (BHP) -Lama; Lama , Bandarban, Chittagong	AGGXAATGTXAATCTGTAAXAGTGATGGCCTGCCATAACXCTCTCAAGCAAAGACGGAGACTGACGCTGTCACTCAAGTTCXAGATAXCACCGCTXCGGAT
A000455	Lama, Soroi Union, AKOTA Office; Lama, Bandarban, Chittagong	GGGXAGTGCXAGTGXGXATXXGXXGXGXXCTGXXTXXXTXCATXTXAAXXAXGAXGXGXAXXXAXXCCXAXXXXAGAXXTCXAGATXXXATXACXXXGAAT
a000456	Ramu Upazila Health Complex (1); Ramu, Cox's Bazar, Chittagong	AGTTAGCGCXAATGTGTAAAATTGATAGTCTGTCTTAACCAATACAAGAAAAGACGGGXCTTGACAATGTCCCXCAGGTCCXAGACAACCCTACTACAAGT
a000457	Ramu Mukti Office; Ramu, Cox's Bazar, Chittagong	AGGCGGTGTGGACGCGTAAXXGTGXTGCXXTGXCTTAACXATXXCXTGCXAAAACAGXXACTXACACTGTAXCXAXGXXXCXXXXXXAXXTXXXTXXXXXT
A000458	Naikhongchhari, Baishari BRAC office; Naikhongchhari, Bandarban, Chittagong	GGGXAAXGNXNATGNNTGTXAXTGGTGGNTAATCTCATCXNATTTAAAAGGAGANGTGXNTAGGXANTGTCCGTAAGCNCAXAAATAXCXTCGCTXCAXGT
a000459	Ramu Upazila Health Complex (1); Ramu, Cox's Bazar, Chittagong	AGTTAGCGCXAATGTGTAAAATTGATAGTCTGTCTTAACCAATXCAAGAAAAGACGGGXCTTGACAATGXCCCXCAGGTCCTAGACAACCCTACTACAAGT
a000462	Ramu Upazila Health Complex (1); Ramu, Cox's Bazar, Chittagong	GGGCGATGTXGACCCCTAACAGXGACACCCTGCCATATTCAATXTGTGAAGAGACGGGXCCXAACACXXTCCCXXAAGCCAXAAACAACAXTGCTTTGAGT
a000463	Ramu Upazila Health Complex (1); Ramu, Cox's Bazar, Chittagong	GGTNAGTGTXAACCCCTGTAATTGGCAGCTTGCCATAACCCATXTANAAGGGGATGGNXXTXGACGCTGTCCCXXGGGTCAGAGACATCACCGCTACGAAN
A000464	Ramu Mukti Office; Ramu, Cox's Bazar, Chittagong	NGGXNGTACXGNCCCGTATXAGNGACXGCNAGTCNCGTTXATTTTAAACGAAGATGTAXACTGGTACCGTNNCTCGGGCNCXAAACGXCANTACTXCGGNC
a000465	Ramu Mukti Office; Ramu, Cox's Bazar, Chittagong	AGTTAACGTXGACCCGTGAAXGTXACGXTTAACTACGACXAXCXCXTGAXGAGACGGAXACTXACGCTATAXCXCAGCXCXTXXXCAXXXXXXXTTTXGAT
a000468	Ramu Upazila Health Complex (1); Ramu, Cox's Bazar, Chittagong	GNNNAATGNXNGTCNNTNTNAGTGATACTTAGTNACGTTGCATXCAAGCGAAGGTNNGXACTAGCGNNGTCACXCGAGTCAXAACCATCANTACTATNGAC
a000469	Naikhongchhari, Baishari BRAC office; Naikhongchhari, Bandarban, Chittagong	AGGTAACATXGATGCGTATNAGTANCAGTCTATCACAACCCACXCATACAAAGGCGGAXACTAGCGNTGTCCCXAGAGTCATANATAACANCNTTANNGAN
a000470	Naikhongchhari, Baishari BRAC office; Naikhongchhari, Bandarban, Chittagong	GGTTGGCANXNATNTGTAAAANGGGTGNNTNATTATANCCANTACANGNGAAANTNNAXCNTAGCNNCNANACCNGGGNNATAACNATCATTGTTNCAAAT
a000472	Ramu Mukti Office; Ramu, Cox's Bazar, Chittagong	AGGTGGTATGAATGCGTATAXGXGXTACXXAAXTACAACXAAXXCAAGCGGGAACGGAXXTTAGCAACGTCAGXCAAGXTCTXGXTAXTXXTXXTACAGGT
a000473	Ramu Mukti Office; Ramu, Cox's Bazar, Chittagong	GGGTAATGTXAATGCGCGAAATTAATGXCCAGXCATATCCAATXCGTAAAAAGACGGGXXCTGGTGCTATAACXCXGCXXCXXXXCXTXCTXXXTXCXXXT
a000474	Ramu Mukti Office; Ramu, Cox's Bazar, Chittagong	AGTCAACGCGGACGCGTGTAATGGATAXCTAGCCTTAACXAAXXXGAGAGGXGACXXXXXTTXGTACTGXCCCXCXGXCTCXXXXXXAXXTXXXTXTXAXX
a000475	Ramu Upazila Health Complex (1); Ramu, Cox's Bazar, Chittagong	GGTTAGTGTXAACCCCTGTAATTGGCAGCTTGCCATAACCCATXTATAAGGGGATGGAXATAGACGCTGTCCCXXGGGTCAGAGACATCACCGCTACGAAT
a000476	Ramu Mukti Office; Ramu, Cox's Bazar, Chittagong	GGTTANCGCGNACCCCCAAATGGGXTAXTTXGTTNCATCGAXXXCXTAAAAAGATAXXXXCTXGTACTGXCXGXCAAXXTCTXXCTGATXXXXCTACXAXC
A000479	Naikhongchhari, Baishari BRAC office; Naikhongchhari, Bandarban, Chittagong	AGGXGGTXTXGATGTGTAXXTGGGGTXCCTAACCTTATCXCATTCATGAAGAGATAGAGATTAACACTATACCCAGGCCCAXCAACAXCXCCGCTXTGAAT
a000483	Ramu Upazila Health Complex (1); Ramu, Cox's Bazar, Chittagong	GGTTAGTGTXAACCCCTGTAATTGGCXGCTTGCCATAACCCATXTATAAGGGGATGGAXATXGACGCTGTCCCXXGGGTCAGAGACATCACCGCTACGAAT
a000484	Naikhongchhari, Baishari BRAC office; Naikhongchhari, Bandarban, Chittagong	GGTXGGCATXXATCTGTAAAAGXGGTGCCCXACCATATCCAATACAAGCGAAGATATAXCTTGGCGACATAACXCGGGTXATAACTATCATXGTTTCAAAT
a000485	Ramu Upazila Health Complex (1); Ramu, Cox's Bazar, Chittagong	XGXTAXXXTXAAXXTXTXXXXXXAGXACXCXGXXTXXXXXAXXXXXXXXAAXXXXXXGXXXXXXXXXXXXXXXXXXXXTXXTXGAXXXXNCNXXATXXXXT
a000486	Naikhongchhari, Baishari BRAC office; Naikhongchhari, Bandarban, Chittagong	GAGCGATAXXGATCTGTGTAAGXGGCAGTCAGTTATGTCCCACXCATGCAAAAATGGAXCCTAACACCATCCCXCAGGTXATAAACAXTCCTACTACGGGT
a000488	Ramu Upazila Health Complex (1); Ramu, Cox's Bazar, Chittagong	AGGCGGTGTXNACGCGTAANTGNNGTGCNCTGTCNTAANGCTTXCATGCGAAAACNGGXACTGACANTGTAACXXGGGTTCGAAATAACCTCGTTTCNAGT
A000489	Naikhongchhari, Baishari BRAC office; Naikhongchhari, Bandarban, Chittagong	NNNXGATATXAGCNTGTNTXAGGGNNGGCCNGTCNNANNXCNTNNATGNGGNGANNNNXNNTGACACNANAACCANNCTCNXANACAXCNCNACTXNGANT
a000492	Ramu Upazila Health Complex (1); Ramu, Cox's Bazar, Chittagong	GAGCAACGCXAATCTCCGACTGTGGCAGCTTACCTCGATGAATXCGTACAAAGACGGAXACTGACAAXATCCCXXGGGCTCGAAACGACACTGCAATAGGT
a000493	Ramu Mukti Office; Ramu, Cox's Bazar, Chittagong	AGGTGNTNCXGATNTGTNXCAGTGXXGXTTAACXTTAACXAAXXXXAGCGNANATAXXXXNTGGTACCNXCCCXCAAXXTCXXAXCGAXXTXXXTXCXGXT
A000494	Ramu Upazila Health Complex (1); Ramu, Cox's Bazar, Chittagong	ANGXANNNTXGANGNGTAXXAGGNNNGGNNTGNCTNANTXANCTNATGAAAAGANNNGXNNNGAXANNGTNNCXNNGNTNNXNNATNXCCCCGNTXTNXNC
a000495	Ramu Mukti Office; Ramu, Cox's Bazar, Chittagong	AGTTAGCGCGAATGTGTAAAATTGATAXTXTGXCTTAACCAAXXCXAGAAAAGACXGXXCTTGACAATGTCCCXCAGXXCCXXGXCAAXCXTAXTACXXXT
A000496	Ramu Mukti Office; Ramu, Cox's Bazar, Chittagong	GNGXANCGCXAGNCCGTNTXAXGGACXXCCTATNACANCXXTXTNAANCAAAGATNGAXACTAACAANGTAACCAAACTNNXANNCNXNXNCGNTXNAAGT
a000499	Ramu Mukti Office; Ramu, Cox's Bazar, Chittagong	XNGCAGCGTXGANCXCCATAATGGAXGXTTAACTAXGTXCAXXXXXTXXXAAGXXAGXXXXXXXTANCGXXXGXXAXCCXXXCXXTAATCXXACTXCGXAT
a000500	Ramu Upazila Health Complex (1); Ramu, Cox's Bazar, Chittagong	GGGNAACGTXGACCTCNNACATTAACACNNNGNCTTNATGNNTXTAAGCAGAGGTGNAXACTGACANTGXCXGXANNGTNATAACCAATATNACTANNNGT
a004101	Fakirachara Brac Office; Jurai Chhari, Rangamati, Chittagong	GGTXNNTATXAACNCNCAAXAGGNGTNNCNNACTATGTTXCTCTTGAACGNGGNCNGNCACAGACGACAACACTCNGGTTNXANATNXCANNGCTTTNGAT
a004102	Fakirachara Brac Office; Jurai Chhari, Rangamati, Chittagong	GAGXAATATXGACGCGTAAXAGGAGTAGTCTATTTCATCXATTTCAAACGAAGACATGGATTAATACTGTCACCCAAGTCCXAAACGXTATTGCATXGAAC
a004103	BRAC (BHP) -Barkal; Barkal, Rangamati, Chittagong	GGTXGGNATXNATGCGTAAXAGXAATAGCCANTCTCATTXCTTXTAAACGGGGATGNAXANTGATACTGTCCNXCGGGNCAXAGATAXNNNNANTTCAGGT
a004105	Kubbang Brac Office; Barkal, Rangamati, Chittagong	GGTXAGCGTXAATGTCTGTXATGGGTAGCCAGTTTCATTXCTTXTATGCAAAGACAGAXATTGATGCCATCAGXCGAGTTAXAGACAXTACCGCTTTGXGT
a004110	BRAC (BHP) -Barkal; Barkal, Rangamati, Chittagong	AGGXAATGCXGACCCGCATXATTGATGGCCTATTATAATXCATXCAAAAGGGAACGGAXACTAATACCATCACXAGGCCCAXCGACGXCATCGCTTCAXAC
a004111	Fakirachara Brac Office; Jurai Chhari, Rangamati, Chittagong	GGTXAGTGTXAGCCCGTATXAGGAATGCCTTGCTATATTXCTTTCATGCGAAGATGGAGACTGGCACTAACACCCGACTCCXAACCAXTCTCACTXCGGAC
a004112	Fakirachara Brac Office; Jurai Chhari, Rangamati, Chittagong	ANTXAGTATXNGNNCGCNTXTXNGGTNNNNANNCNCNANXANTTCATNAAANGNCNNAGACAAGTACCATNCCTCNGGNCAXAGATGXNANNACTTCNGGN
a004115	BRAC (BHP) -Barkal; Barkal, Rangamati, Chittagong	GGTXAGCGTXAATGTCTGTXATGGGTAGCCAGTTTCATTXCTTXTATGCAAAGACAGAXATTGAXGCCATCAGXCGAGTTAXAGACAXTACCGCTTTGXGT
a004117	Fakirachara Brac Office; Jurai Chhari, Rangamati, Chittagong	GNNXAATATXGATGCNTATXNGTNGTAGTTTATTATGNCXNTTTCATGCAGAGATNGGGATAGGTAATGTCACCAGNCNTNXNAATAXNNCCGCTTCANAT
a004118	Fakirachara Brac Office; Jurai Chhari, Rangamati, Chittagong	GNNXAATNTXGATNCNNATXNGTNGTAGTTTANTATGTCXANTTCATGCAGAGATNGNGNTAGGNNATGTCACCNGNCNTNXCAATAXNNCCGCTTCAGAT
a004119	BRAC (BHP) -Barkal; Barkal, Rangamati, Chittagong	AGGXAATGCXGACCCGCATXATTGATGGCCTATTATAATXCATACAAAAGGGAACGGAXACTAATACCATCACXAGGCCCAXCGACGXCATCGCTTCAGAC
a004135	Fakirachara Brac Office; Jurai Chhari, Rangamati, Chittagong	GNNXAATNTXGATCCNCATXNGTNGTAGTTNACTNCGNCXNNTTCATGCAGAGATNGAGATTGGTNATGAANCCNGNCNTCXNAATAXNNCCGCTTCANAT
a004137	Fakirachara Brac Office; Jurai Chhari, Rangamati, Chittagong	GGTXAATGTXAACCCNCGTXAGTAGTGCCCAATCATNACXATTTTANAAANGGGCNGAGACTAACNCTGTACCTAGAGCCAXANACGXTCCTGCTTNAGNT
a004140	BRAC (BHP) -Barkal; Barkal, Rangamati, Chittagong	GGGXAACGTXGGNCCGTAAXAGTGGTANCCTGTCACNATXCACTCATACGGNNGCNTAXACTAGCACCGTCCGXAGACCCNXANNTAXNACNGNTTNGGAT
a004150	Chittagong Medical College Hospital; Panchlaish, Chittagong, Chittagong	GGGXGGCGTXAACCTGCATXAXTAGCAGCTAGCCACGTCXCATTCATGAAGAAACGGAXCCTAACGCCAACCCTAGACTTCXAAATAXCACCGCTTCGAGT
a004151	BRAC (BHP) -Rajasthali; Rajasthali, Rangamati, Chittagong	AGTXAATATXGACCTGTAAXTTTAATGGCTTATCTCGTCXATCTTAAGCAAAGACGGAXACTGATGACATAAGTAGAGCTAXAAACAXCACCACTXCAGGT
a004152	Islampur Brac Office; Rajasthali, Rangamati, Chittagong	AGGXGGTGTXAACCCGTATXTGGAATAGCCTGCCTTAACXCTTXCATACXAGGATGGGXATTXGXACTAAAXCXCGGCTCAXAAATAXCATTGTTTTAXGC
a004153	BRAC (BHP) -Rajasthali; Rajasthali, Rangamati, Chittagong	AGTXAATATXGACCTGTAAXTTTAATGGCTTATCTCGTCXATCXTAAGCAAAGACGGAGACTGATGACATAAGXAGAGCTAXAAACAXCACCACTTCAGGT
a004156	Chittagong Medical College Hospital; Panchlaish, Chittagong, Chittagong	AGGXAATATXGGCGCGCATXATTGATAGCTAGTCTTAATXCATTTATACAGGGATAGGCACTAACACCGTCCCTAGAGTCAXAGACAXTACTGCTTTGAGT
a004157	BRAC (BHP) -Lama; Lama , Bandarban, Chittagong	GGTXAATATXAATCCGTAAXATGGGTGCCTTGTCATAACXCTTTTATACGAAGGCGGAGACAGGCGCTGTCACXAGACTTAXAAACAXTACCACTXCGAAT
a004161	BRAC (BHP) -Rajasthali; Rajasthali, Rangamati, Chittagong	GGTXGGCATXAACCCGTGTXTGTGGTGCCTTGTCTTGTCXCATXTATGAGGAGATGGGXCTTGACAACGTACGXCGGGTTCXAGACAXTACTGTTTTAAGC
a004163	BRAC (BHP) -Rajasthali; Rajasthali, Rangamati, Chittagong	AGGXAACGCXGATCTGCATXTGTAACAGCCTATTTTAACXCTTTTAAGCAAAGATGGAXATTGGTAACGTCACXXAACTTAXAAACAXCCTCGCATCAGGT
a004172	Lama Gozalia BRAC Office (2); Lama, Bandarban, Chittagong	GGGXGACATXAGCCCCTAAXAXTAXTAGCTTATTACGATXCATXXXXXXXXXXXXXXXXXXXXXXXXXXXXXXXXAAGCCAXAAATGXCCCCGCTXCAXGT
a004173	BRAC (BHP) -Lama; Lama , Bandarban, Chittagong	AAGXAGTATXGGCCCGNGTXNGXGGNGGTCTACCTTAATXCTNTTGTNAGAANANNGAGCTTGATGCNGTCCNXCAGGTCCXAGACAXCANNGTATCGGGN
a004174	BRAC (BHP) -Rajasthali; Rajasthali, Rangamati, Chittagong	GAGXAACGTXAATGCGTAAXTTTGGCAGCCTGTCTCGTCXCATACGAAAAGAGATGGGXACTAGCACCATCCCXCAGGTTAXAAACGXCACCGCTXTGAGT
a004175	BRAC (BHP) -Rajasthali; Rajasthali, Rangamati, Chittagong	GGTXAATGTXAATCCGTAAXAGTGGTAGCTAATCATAATXCTTTTAAGAGGAGATGGAXACTAATGCCGTCAGXAGGGTTCXAAATAXCCCTATTTCGGAT
a004181	Lama Gozalia BRAC Office (2); Lama, Bandarban, Chittagong	GGTXAGTGTXGATCTGTGTXTGGGACAGCTTGTTTTAATXCATTTATGAAAAGACAGAXACTGATGATGTCCCCCAAGTCCXCAATGXCACTATTXCAGGT
a004182	BRAC (BHP) -Lama; Lama , Bandarban, Chittagong	XATXAATATXAACCTGCGTXAXTGGTACCTAGTCATAATXCATTCGAGAGAAGACGGAXCCTGGCGACGTCCCXAAAGCTCXAAACGXTCCTATTTCAGAT
a004185	Chittagong Medical College Hospital; Panchlaish, Chittagong, Chittagong	AAGXGGCATXGACGCCTATXATTGGTAGCCTACCACGATXCATTTATGCGGAGATGTACATTGACAACGTCACCAGAGTTCXAGATAXCACCACTTTAAAT
a004187	BRAC (BHP) -Rajasthali; Rajasthali, Rangamati, Chittagong	GGTXGGTGTXAGTCCGTATXTGTAGTAGCCTGTTACGACXCATTTATAAGAGAGTAGAXACTGACACTAACCCXCAAGTTAXAACTAXCCCCGTTTTAAAT
a004196	Chittagong Medical College Hospital; Panchlaish, Chittagong, Chittagong	AGGXAATATXGGCGCGCATXATTGATAGCTAGTCTTAATXCATTTATACAGGGATAGGCACTAACACCGTCCCXAGAGTCAXAGACAXTACTGCTXTGAGT
a004197	Lama Gozalia BRAC Office (2); Lama, Bandarban, Chittagong	GGTXAGTGTXGATCTGTGTXTGGGACAGCTTGTTTTAATXCATTTATGAAAAGACAGAXACTGATGATGTCCCCCAAGTCCXCAATGXCACTXTTXCAGGT
a004200	BRAC (BHP) -Lama; Lama , Bandarban, Chittagong	GGGXNATNTXANCCCGCAAXAGGNGNNNCCTGNNNCATTXAATTNATACGAANACGGNXANNNNCNCTGNCCCXCNAGTTNXANANNXNANCACTTCNAAT
a004204	Lama Gozalia BRAC Office (2); Lama, Bandarban, Chittagong	ANNXNNTNNXNANNTNTATXAGTNGNGNNCNNCNACAANXCATNNNANCGAAGANNGNXNNNGACGCTGTNNCNANGNTNNXAAACAXNCNNNCTXNGGNT
a004207	Lama Gozalia BRAC Office (2); Lama, Bandarban, Chittagong	GATXAATGTXAACCTGTGTXTGGAGCGGCCTATTACAACXCATTCATGAGGAAGCGGGGACTAACACTGTAACCAAGCTTAXAGACGXCACCACTXTGAAT
a004208	Lama Gozalia BRAC Office (2); Lama, Bandarban, Chittagong	GGGXGACATXAGCCCCTAXXAXTAGTAGCTTATTACGATXCATTTAAGAAGAGACGTAXCCAAGCGCTATCCCTCAAGCCAXAAATGXCCCCGCTXCAAGT
a004212	BRAC (BHP) -Rajasthali; Rajasthali, Rangamati, Chittagong	GGTXGGTGTXAGTCCGTATXTXTAGTAGCCTGTTACGACXCATTTATAAGAGAGTAGAXACTGACACTAACCCXCAAGTXAXAACTAXCCCCGTTTTAAAT
a004213	BRAC (BHP) -Rajasthali; Rajasthali, Rangamati, Chittagong	AGGXAXCGCXGATCTGCATXTGXAACAGCCTATTTTAACXXTTTTAAGCAAAGATGGAGATTGGTAACGTCACTXAACTTAXAAACAXCCTCGCAXCAGGT
a004214	BRAC (BHP) -Rajasthali; Rajasthali, Rangamati, Chittagong	GGTXAGTATXGGCCCGTATXTGTAGTAGCTTGTTACGACXCATXTATAAGAGGGXAGAXACTGACACTAACCCXCAAGTTAXAACTAXCCCCGTTTTGAGT
a004217	BRAC (BHP) -Lama; Lama , Bandarban, Chittagong	GAGXXATGTXGATCCGTATXATGXGCGCCTTGTCTCGTTXCTTXCATXCAGAGAXXXAGATTGGTGACATCCCXAAAGTCAXAAATGXXACCACTTTAGGT
a004218	BRAC (BHP) -Lama; Lama , Bandarban, Chittagong	GGGXGGTGTXGACGCGCGTXATTGGCACCTAGCCACATCXCTTTCAAAAGAAGACGGGXATTGACGCTGAACGXCGACTTCXAGACGXCCCCACTTTGGAT
A004227	Alikadam Upazila Health Complex; Alikadam, Bandarban, Chittagong	AGTXXXXATXXXCCXCXXXXXXXXGXXXXXXXTXXTXXXXAXXXXXTAXXGXGGXXXAGCXTXATGCXATXXXXXXXXXXCXXGXCXXTAXXXXXXXXAGT
A004228	Alikadam Upazila Health Complex; Alikadam, Bandarban, Chittagong	GAGXAGTATXGATGCCTAAXAGTAATAGCCTATTTCGTTXCTCTTAAGCAGAGATGGGXCCTAACGACGTACCTCAGGCCAXAGCCGXCACCGCTXTAGAT
A004229	Ramu Mukti Office; Ramu, Cox's Bazar, Chittagong	XGGXXXXXXXGAXCCGXXXXTXTGXXACXTXGXTXXGTCXXXTAXXTXCAAAXXTGXGGATXXACGCTAXXXXXXAXXTTCXCAXXGXTCCXGCXXXAAAX
a004233	BRAC (BHP) -Lama; Lama , Bandarban, Chittagong	GGGXAATGTXAATGTGTATXAGTGGTGCCCTGTTACGTCXCTTXTATACAGAGGCGGAXACAAGTGATGTCACXAGACTTAXAAACAXTATCACTTTAAAT
A004242	Alikadam Upazila Health Complex; Alikadam, Bandarban, Chittagong	NNTXAGTNTXGATGTGTATXAXTAGTGCTCTGCNATGNCXNATNNAAGAAGGGNTGGAXCCTXGCGCTGNAXCXAAGCTTAXCNNTAXNCCTANTXTNAAT
a004244	BRAC (BHP) -Lama; Lama , Bandarban, Chittagong	GGGXAATGTXAATGTGTATXAGTGGTGCCCTGTTACGTCXCTTXTATACAGAGGCGGAXACAAGTGATGTCACXAGACTTAXAAACAXTATCACTXTAAAT
A004248	Alikadam Upazila Health Complex; Alikadam, Bandarban, Chittagong	XGXXAXXGTXXXTCXNXGTXXXXXXXXCXXXXTCXTGAXXAXXXXATGXXXXXXXAXXXXXXGXNGXXXXXXXXXXXXTTXXXXXXGXTXXXAXXXXAXXC
a004251	Lama Gozalia BRAC Office (2); Lama, Bandarban, Chittagong	GGGXGACATXAGCCCCTAAXAXGAGTAGCTTATTACGATXCATTTAAGAAGAGACGTAXCCAAGCGCTATCCCTCAAGCCAXAAATGXCCCCGCTXCAAGT
a004257	Suwalak BRAC Laboratory Office (2); Bandarban Sadar, Bandarban, Chittagong	GGTXGATATXAGCCTCTATXAGGGACACTTTGCCTCAXCXAATTTXAGAAAAAGTGGAXACTGACGATGACCCCCGACTTCXCACCGXCACCGCTXCAXAT
A004262	Alikadam Upazila Health Complex; Alikadam, Bandarban, Chittagong	GXXXXXTXTXXXXXTXXXXXXXXXGXGXXXAAXXXXAXTXAAXXXATACAAXXXXXXXXCCXXGCAAXXXACXXXXGXTCXXAGXTXXTAXXXCXXXAXGX
a004269	BRAC (BHP) -Lama; Lama , Bandarban, Chittagong	NNGXNGNANXNACCNGTANXATTNGCANNTAGCCACANNXCNTXTANGAAAAAACAGAXNCANACNCCNTCCCXAANNNCNXANATNXNCNTGCTXCNGGT
A004278	Alikadam Upazila Health Complex; Alikadam, Bandarban, Chittagong	GAGXAGTATXGATGCCTAXXAGTAATAGCCTATTTCGTTXCTCTTAAGCAGAGATGGGXCCTAACGACGTACCTCAGGCCAXAGCCGXCACCGCTXTAGAT
A004284	Lama Upazila Health Complex; Lama, Bandarban, Chittagong	GATXAATGTXAACCTGTGTXTGGAGCGGCCTATTACAACXCATXCXTGAGGAAGCGGGXACTAACACTGTAACCAAGCTTAXAGACGXCACCACTXTGAAT
A004286	Bandarban Civil Surgeon Office; Bandarban Sadar, Bandarban, Chittagong	AAGXGATATXGGCCCGTAAXAGTAGCAGTTAATTATGACXCTTTCATAAGGAGACGGAXACTAACAATGAAACCCGGGTTCXAAATAXCATCATTXCGAGT
A004295	Bandarban Civil Surgeon Office; Bandarban Sadar, Bandarban, Chittagong	GNNXNATNTXGNCNNGTNTXAGNNNCGGCTTATCNCNTCXANTTCATNNNNANNCGGNXACNNNCNNTGNAACTCNNNNTNXCAANAXCANCNCTXCNXGT
A004302	Alikadam Upazila Health Complex; Alikadam, Bandarban, Chittagong	XAXXGXXGCXXXXCXXTXXXXXXAGTXXCXAXXXXXGAXXXXXXXAXGCXXAXXXXXGXACXXXXXXXXTXXXXAXXXXXXXXXXXXXTACCXCXXCXXGX
a004304	BRAC (BHP) -Lama; Lama , Bandarban, Chittagong	AGGXGATATXGACGTGCAAXATTAGCAGTTTGTCATATTXCATXCATGAGGAGGTGGGXCCAGAXGCTAAAAGXAGACTCCXAGACGXTACCGTTTCAXGC
A004312	Alikadam Upazila Health Complex; Alikadam, Bandarban, Chittagong	GGXXAXXXXXGXXCNGXXXXXXTGGXGXCTXXXCXXAXTXAATTCATGXXXXXXXGGXXACXAXXXXCNXAXXXXGAGNNXXAGXXXXXXCXXCXXXAXAT
a004315	Thanchi Upazila Health Complex; Thanchi, Bandarban, Chittagong	GGTXAGTGTXGGTCTGTATXAGTGGCAGCCTGTCTCGACXAATTTATACGGAAATGGAXATAGGCAATGTCCCTCGGGCTAXAAATAXCCCCGTTXCAGAT
a004317	BRAC (BHP) -Lama; Lama , Bandarban, Chittagong	XAXXAATGCXXAXCCXCXAXATXXXXXXXXXXXTTXXXXXCXXXCXTXCXXAAACGGAXXTXXAXXCCXAXXCXXXXXXTXXXXACXXXXXTAXXTXGXXX
A004319	Alikadam Upazila Health Complex; Alikadam, Bandarban, Chittagong	GGGXGATGCXAACCCGXATXTGGGACACCTTATCTTGACXATTTTATGCAGAGATAGGXACAXACAACATAACTCAAGTCCXAAACAXTACCGCTXCAAAT
A004359	Bandarban Civil Surgeon Office; Bandarban Sadar, Bandarban, Chittagong	AGXXAXXGTXXATGCCXXTXXGXGXXAGTCTXXTXTGXXXCXTTXAAXCGAGXAXGXAXXXXGXTAXTXAAXXXXXXCXCAXAXACXXCCXCAXXXXAXGT
A004365	Bandarban Civil Surgeon Office; Bandarban Sadar, Bandarban, Chittagong	AAGXGATATXGGCCCGTAAXAGTAGCAGTTAATTATGACXCTTTCATAAGGAGACGGAGACTAACAATGAAACCCGGGTTCXAAATAXCATCATTXCGAGT
A004368	Bandarban Civil Surgeon Office; Bandarban Sadar, Bandarban, Chittagong	GATXAATGNXGACNNGTNTXAGTAGCGGCTTATCNCATCXAATTCATNCANANNCGGGXACAGGCACTGTAACTCANCNTCXCAANAXCANCGCTXCGXGT
A004394	Bandarban Civil Surgeon Office; Bandarban Sadar, Bandarban, Chittagong	GATXAATGTXGACGTGTNTXAGTAGCGGCTTATCTCATCXAATTCATGCANANNCGGGXACAGGCACTGTAACTCANCCTCXCAACAXCACCGCTXCGGGT
