# Supplementary material for: Mapping imported malaria in Bangladesh using parasite genetic and human mobility data
Source: eLife journal article supplement (doi:10.7554/elife.43481), 2019-04-01
Supplement: supp [file elife-43481-supp-v1.zip › elife_poa_e43481_Supplementary_File_5.xls]

## Sheet: travel_survey
	10065126	10795869	20030431	20030463	20031415	20031431	20031447	20031463	20031479	20035115	20035127	20035131	20035147	20035163	20035168	20035179	20037319	20037338	20037357	20037376	20038919	20038938	20038957	20038976	20039119	20039138	20039157	20039176	20039519	20039538	20039557	20039576	20129490	20150415	20150476	20150495	20150602	20150811	20150844	20150850	20150863	20150875	20150888	20151017	20151018	20151838	20151895	20151904	20151905
10065126	0.6	0	0.2	0	0.2	0	0	0	0	0	0	0	0	0	0	0	0	0	0	0	0	0	0	0	0	0	0	0	0	0	0	0	0	0	0	0	0	0	0	0	0	0	0	0	0	0	0	0	0
10795869	NA	NA	NA	NA	NA	NA	NA	NA	NA	NA	NA	NA	NA	NA	NA	NA	NA	NA	NA	NA	NA	NA	NA	NA	NA	NA	NA	NA	NA	NA	NA	NA	NA	NA	NA	NA	NA	NA	NA	NA	NA	NA	NA	NA	NA	NA	NA	NA	NA
20030431	0	0	0.9808	0.0064	0	0	0.0016	0	0	0	0	0.0016	0	0.0016	0	0	0	0	0	0	0	0	0	0	0	0	0	0	0	0	0	0	0	0	0	0	0	0	0	0	0	0	0	0	0	0	0	0	0
20030463	0	0	0.108571	0.845714	0.00285714	0	0	0	0	0	0	0	0	0.00857143	0.00285714	0	0	0	0	0	0	0	0	0	0	0	0	0	0	0	0	0	0	0	0	0	0	0	0	0	0	0	0	0	0	0	0	0	0
20031415	0	0	0	0	0.846154	0	0	0	0	0	0	0	0	0	0	0	0	0	0	0	0.0153846	0	0.0153846	0	0	0	0.0307692	0	0.0153846	0	0	0	0	0	0	0	0	0	0	0	0	0	0	0	0	0	0	0	0
20031431	NA	NA	NA	NA	NA	NA	NA	NA	NA	NA	NA	NA	NA	NA	NA	NA	NA	NA	NA	NA	NA	NA	NA	NA	NA	NA	NA	NA	NA	NA	NA	NA	NA	NA	NA	NA	NA	NA	NA	NA	NA	NA	NA	NA	NA	NA	NA	NA	NA
20031447	0	0	0	0	0.2	0	0.8	0	0	0	0	0	0	0	0	0	0	0	0	0	0	0	0	0	0	0	0	0	0	0	0	0	0	0	0	0	0	0	0	0	0	0	0	0	0	0	0	0	0
20031463	0	0	0	0	0.0266667	0.0133333	0	0.92	0.0133333	0	0	0	0	0	0	0	0	0	0	0	0	0	0	0	0	0	0	0.0133333	0	0	0	0	0	0	0	0	0	0	0	0	0	0	0	0	0	0	0	0	0
20031479	0	0	0	0	0	0	0	0.1	0.9	0	0	0	0	0	0	0	0	0	0	0	0	0	0	0	0	0	0	0	0	0	0	0	0	0	0	0	0	0	0	0	0	0	0	0	0	0	0	0	0
20035115	0	0	0	0	0	0	0	0	0	1	0	0	0	0	0	0	0	0	0	0	0	0	0	0	0	0	0	0	0	0	0	0	0	0	0	0	0	0	0	0	0	0	0	0	0	0	0	0	0
20035127	0	0	0	0	0	0	0	0	0	0	1	0	0	0	0	0	0	0	0	0	0	0	0	0	0	0	0	0	0	0	0	0	0	0	0	0	0	0	0	0	0	0	0	0	0	0	0	0	0
20035131	0	0	0.0105263	0	0	0	0	0	0	0	0	0.968421	0	0	0	0	0	0	0	0	0	0	0	0	0	0	0	0.0105263	0	0	0	0	0	0	0	0	0	0	0	0	0	0	0	0	0	0	0	0	0
20035147	0	0	0	0.00235294	0	0	0	0	0	0.00235294	0	0	0.967059	0.00705882	0	0.0141176	0	0.00235294	0	0	0	0	0	0	0	0	0	0	0	0	0	0	0	0	0	0	0	0	0	0	0	0	0	0	0	0	0	0	0
20035163	0	0	0.00934579	0.000934579	0	0	0	0	0	0	0	0.00186916	0.0149533	0.956075	0.00560748	0.00280374	0	0	0	0	0.000934579	0.00186916	0	0	0	0	0	0	0	0.000934579	0.00186916	0	0	0	0	0.000934579	0	0	0	0	0	0	0	0	0	0	0	0	0
20035168	0	0	0.00434783	0.00144928	0	0	0	0	0	0	0	0	0	0.0144928	0.969565	0.00144928	0	0	0	0	0	0	0	0	0	0	0	0.00289855	0	0	0.00144928	0	0	0	0	0	0	0	0	0	0	0	0	0	0	0	0	0	0.00144928
20035179	0	0	0	0	0	0	0	0.00192308	0.00384615	0	0	0	0.0173077	0.00192308	0	0.951923	0	0	0	0	0	0	0	0	0	0	0	0	0	0	0.00192308	0	0	0	0	0	0	0	0	0	0	0	0	0	0	0	0	0	0.00192308
20037319	0	0	0	0	0	0	0	0	0	0	0	0	0	0	0	0.00869565	0.973913	0.0130435	0	0	0	0	0	0	0	0	0	0	0	0	0	0	0	0	0	0	0	0	0	0	0	0	0	0	0	0	0	0	0
20037338	0	0	0	0	0	0	0	0	0	0	0	0	0	0	0	0	0	0.938462	0	0.0307692	0	0	0	0	0	0	0	0.00769231	0	0	0	0	0	0	0	0	0	0	0	0	0	0	0	0	0	0	0	0	0
20037357	0	0	0	0	0	0	0	0	0	0	0	0	0	0	0	0	0	0	0.995122	0.00487805	0	0	0	0	0	0	0	0	0	0	0	0	0	0	0	0	0	0	0	0	0	0	0	0	0	0	0	0	0
20037376	0	0	0.00392157	0	0	0	0	0	0	0	0	0	0	0	0	0	0.00392157	0	0	0.984314	0	0	0	0	0	0	0	0	0	0	0	0	0	0	0	0	0	0	0	0	0	0	0	0	0	0	0	0	0
20038919	0	0	0	0	0	0	0	0	0	0	0	0	0	0	0	0	0	0	0	0	0.9	0.1	0	0	0	0	0	0	0	0	0	0	0	0	0	0	0	0	0	0	0	0	0	0	0	0	0	0	0
20038938	0	0	0	0	0	0	0	0	0	0	0	0	0	0	0	0	0	0	0	0	0.114286	0.828571	0.0571429	0	0	0	0	0	0	0	0	0	0	0	0	0	0	0	0	0	0	0	0	0	0	0	0	0	0
20038957	0	0	0	0	0	0	0	0	0	0	0	0	0	0	0	0	0	0	0	0	0	0	1	0	0	0	0	0	0	0	0	0	0	0	0	0	0	0	0	0	0	0	0	0	0	0	0	0	0
20038976	0	0	0	0	0	0	0	0	0	0	0	0	0	0	0	0	0	0	0	0	0	0	0	1	0	0	0	0	0	0	0	0	0	0	0	0	0	0	0	0	0	0	0	0	0	0	0	0	0
20039119	0	0	0	0	0	0	0	0	0	0	0	0	0	0	0	0	0	0	0	0	0	0	0	0	0.986667	0	0	0	0.0133333	0	0	0	0	0	0	0	0	0	0	0	0	0	0	0	0	0	0	0	0
20039138	0	0	0	0	0	0	0	0	0	0	0	0	0	0	0	0	0	0	0	0	0	0	0	0	0	1	0	0	0	0	0	0	0	0	0	0	0	0	0	0	0	0	0	0	0	0	0	0	0
20039157	NA	NA	NA	NA	NA	NA	NA	NA	NA	NA	NA	NA	NA	NA	NA	NA	NA	NA	NA	NA	NA	NA	NA	NA	NA	NA	NA	NA	NA	NA	NA	NA	NA	NA	NA	NA	NA	NA	NA	NA	NA	NA	NA	NA	NA	NA	NA	NA	NA
20039176	0	0.00952381	0	0	0	0	0	0.00952381	0	0	0	0	0	0	0	0	0	0	0	0	0	0	0	0	0	0	0	0.961905	0	0	0.00952381	0	0	0	0	0	0	0	0	0	0	0	0	0	0	0	0	0	0
20039519	0	0	0	0	0	0	0	0	0	0	0	0	0	0	0	0	0	0	0	0	0	0	0	0	0	0	0	0	1	0	0	0	0	0	0	0	0	0	0	0	0	0	0	0	0	0	0	0	0
20039538	0	0	0	0	0	0	0	0	0	0	0	0	0	0	0	0	0	0	0	0	0	0	0	0	0	0	0	0	0.1	0.9	0	0	0	0	0	0	0	0	0	0	0	0	0	0	0	0	0	0	0
20039557	0	0	0	0	0	0	0	0	0	0	0	0	0	0	0	0	0	0	0	0	0	0	0	0	0	0	0	0	0	0	1	0	0	0	0	0	0	0	0	0	0	0	0	0	0	0	0	0	0
20039576	0	0	0	0	0	0	0	0	0	0	0	0	0	0	0	0	0	0	0	0	0	0	0	0	0	0	0	0	0	0	0	1	0	0	0	0	0	0	0	0	0	0	0	0	0	0	0	0	0
20129490	0	0	0	0	0.4	0	0	0	0	0	0	0	0	0	0	0	0	0	0	0	0	0	0	0	0	0	0	0	0	0	0	0	0.6	0	0	0	0	0	0	0	0	0	0	0	0	0	0	0	0
20150415	0	0	0	0	0	0	0	0	0	0	0	0	0	0	0	0	0	0	0	0	0	0	0	0	0	0	0	0	0	0	0	0	0	1	0	0	0	0	0	0	0	0	0	0	0	0	0	0	0
20150476	0	0	0	0	0	0	0	0	0	0	0	0	0	0	0	0	0	0	0	0	0	0	0	0	0	0	0	0	0	0	0	0	0	0	1	0	0	0	0	0	0	0	0	0	0	0	0	0	0
20150495	NA	NA	NA	NA	NA	NA	NA	NA	NA	NA	NA	NA	NA	NA	NA	NA	NA	NA	NA	NA	NA	NA	NA	NA	NA	NA	NA	NA	NA	NA	NA	NA	NA	NA	NA	NA	NA	NA	NA	NA	NA	NA	NA	NA	NA	NA	NA	NA	NA
20150602	0	0	0	0	0	0	0	0	0	0	0	0	0	0	0	0	0	0	0	0	0	0	0	0	0	0	0	0	0	0	0	0	0	0	0	0	0.866667	0	0	0	0	0	0	0	0	0	0	0	0
20150811	0	0	0	0	0	0	0	0	0	0	0	0	0	0	0	0	0	0	0	0	0	0	0	0	0	0	0	0	0	0	0	0	0	0	0	0	0	0.8	0	0	0	0	0	0	0	0	0	0	0
20150844	0	0	0	0	0	0	0	0	0	0	0	0	0	0	0	0	0	0	0	0	0	0	0	0	0	0	0	0	0	0	0	0	0	0	0	0	0	0	1	0	0	0	0	0	0	0	0	0	0
20150850	0	0	0	0	0	0	0	0	0	0	0	0	0	0	0	0	0	0	0	0	0	0	0	0	0	0	0	0	0	0	0	0	0	0	0	0	0	0	0	1	0	0	0	0	0	0	0	0	0
20150863	0	0	0	0	0	0	0	0	0.2	0	0	0	0	0	0	0	0	0	0	0	0	0	0	0	0	0	0	0	0	0	0	0.2	0	0	0	0	0	0	0	0	0.6	0	0	0	0	0	0	0	0
20150875	0	0	0	0	0	0	0	0	0	0	0	0	0	0	0	0	0	0	0	0	0	0	0	0	0	0	0	0	0	0	0	0	0	0	0	0	0	0	0	0	0	0.8	0	0	0	0	0	0.2	0
20150888	NA	NA	NA	NA	NA	NA	NA	NA	NA	NA	NA	NA	NA	NA	NA	NA	NA	NA	NA	NA	NA	NA	NA	NA	NA	NA	NA	NA	NA	NA	NA	NA	NA	NA	NA	NA	NA	NA	NA	NA	NA	NA	NA	NA	NA	NA	NA	NA	NA
20151017	0	0	0	0	0.266667	0	0	0	0	0	0	0	0	0	0	0	0	0	0	0	0	0	0	0	0	0	0	0	0	0	0.0666667	0	0	0	0	0	0	0	0	0	0	0	0	0.666667	0	0	0	0	0
20151018	0	0	0	0	0	0	0	0	0	0	0	0	0	0	0	0	0	0	0	0	0	0	0	0	0	0	0	0	0	0	0	0	0	0	0	0	0	0	0	0	0	0	0	0	0.6	0	0	0	0
20151838	0	0	0	0	0	0	0	0	0	0	0	0	0	0	0	0	0	0	0	0	0	0	0	0	0	0	0	0	0	0	0	0	0	0	0	0	0	0	0	0	0	0	0	0	0	1	0	0	0
20151895	0	0	0	0	0	0	0	0	0	0	0	0	0	0	0	0	0	0	0	0	0	0	0	0	0	0	0	0	0	0	0	0	0	0	0	0	0	0	0	0	0	0	0	0	0	0	0.8	0	0
20151904	NA	NA	NA	NA	NA	NA	NA	NA	NA	NA	NA	NA	NA	NA	NA	NA	NA	NA	NA	NA	NA	NA	NA	NA	NA	NA	NA	NA	NA	NA	NA	NA	NA	NA	NA	NA	NA	NA	NA	NA	NA	NA	NA	NA	NA	NA	NA	NA	NA
20151905	NA	NA	NA	NA	NA	NA	NA	NA	NA	NA	NA	NA	NA	NA	NA	NA	NA	NA	NA	NA	NA	NA	NA	NA	NA	NA	NA	NA	NA	NA	NA	NA	NA	NA	NA	NA	NA	NA	NA	NA	NA	NA	NA	NA	NA	NA	NA	NA	NA
20151906	0	0	0	0	0	0	0	0	0	0	0	0	0	0	0	0	0	0	0	0	0	0	0	0	0	0	0	0	0	0	0	0	0	0	0	0	0	0	0	0	0	0.2	0	0	0	0	0	0	0
20152824	NA	NA	NA	NA	NA	NA	NA	NA	NA	NA	NA	NA	NA	NA	NA	NA	NA	NA	NA	NA	NA	NA	NA	NA	NA	NA	NA	NA	NA	NA	NA	NA	NA	NA	NA	NA	NA	NA	NA	NA	NA	NA	NA	NA	NA	NA	NA	NA	NA
20153313	0	0	0	0	0	0	0	0	0	0	0	0	0	0	0	0	0	0	0	0	0	0	0	0	0	0	0	0	0	0	0	0	0	0	0	0	0	0	0	0	0	0	0	0	0	0	0	0	0
20153319	0	0	0	0	0	0	0	0	0	0	0	0	0	0	0	0	0	0	0	0	0	0	0	0	0	0	0	0	0	0	0	0	0	0	0	0	0	0	0	0	0	0	0	0	0	0	0	0	0
20153323	NA	NA	NA	NA	NA	NA	NA	NA	NA	NA	NA	NA	NA	NA	NA	NA	NA	NA	NA	NA	NA	NA	NA	NA	NA	NA	NA	NA	NA	NA	NA	NA	NA	NA	NA	NA	NA	NA	NA	NA	NA	NA	NA	NA	NA	NA	NA	NA	NA
20153342	0	0	0	0	0	0	0	0	0	0	0	0	0	0	0	0	0	0	0	0	0	0	0	0	0	0	0	0	0	0	0	0	0	0	0	0	0	0	0	0	0	0	0	0	0	0	0	0	0
20153361	0	0	0	0	0	0	0	0	0	0	0	0	0	0	0	0	0	0	0	0	0	0	0	0	0	0	0	0	0	0	0	0	0	0	0	0	0	0	0	0	0	0	0	0	0	0	0	0	0
20153366	0	0	0	0	0	0	0	0	0	0	0	0	0	0	0	0	0	0	0	0	0	0	0	0	0	0	0	0	0	0	0	0	0	0	0	0	0	0	0	0	0	0	0	0	0	0	0	0	0
20153395	0	0	0	0	0	0	0	0	0	0	0	0	0	0	0	0	0	0	0	0	0	0	0	0	0	0	0	0	0	0	0	0	0	0	0	0	0	0	0	0	0	0	0	0	0	0	0	0	0
20153525	0	0	0	0	0	0	0	0	0	0	0	0	0	0	0	0	0	0	0	0	0	0	0	0	0	0	0	0	0	0	0	0	0	0	0	0	0	0	0	0	0	0	0	0	0	0	0	0	0
20153526	0	0	0	0	0	0	0	0	0	0	0	0	0	0	0	0	0	0	0	0	0	0	0	0	0	0	0	0	0	0	0	0	0	0	0	0	0	0	0	0	0	0	0	0	0	0	0	0	0
20153735	0	0	0	0	0	0	0	0	0	0	0	0	0	0	0	0	0	0	0	0	0	0	0	0	0	0	0	0	0	0	0	0	0	0	0	0	0	0	0	0	0	0	0	0	0	0	0	0	0
20154133	NA	NA	NA	NA	NA	NA	NA	NA	NA	NA	NA	NA	NA	NA	NA	NA	NA	NA	NA	NA	NA	NA	NA	NA	NA	NA	NA	NA	NA	NA	NA	NA	NA	NA	NA	NA	NA	NA	NA	NA	NA	NA	NA	NA	NA	NA	NA	NA	NA
20154713	NA	NA	NA	NA	NA	NA	NA	NA	NA	NA	NA	NA	NA	NA	NA	NA	NA	NA	NA	NA	NA	NA	NA	NA	NA	NA	NA	NA	NA	NA	NA	NA	NA	NA	NA	NA	NA	NA	NA	NA	NA	NA	NA	NA	NA	NA	NA	NA	NA
20154718	0	0	0	0	0	0	0	0	0	0	0	0	0	0	0	0	0	0	0	0	0	0	0	0	0	0	0	0	0	0	0	0	0	0	0	0	0	0	0	0	0	0	0	0	0	0	0	0	0
20154725	0	0	0	0	0.2	0	0	0	0	0	0	0	0	0	0	0	0	0	0	0	0	0	0	0	0	0	0	0	0	0	0	0	0	0	0	0	0	0	0	0	0	0	0	0	0	0	0	0	0
20154732	0	0	0	0	0	0	0	0	0	0	0	0	0	0	0	0	0	0	0	0	0	0	0	0	0	0	0	0	0	0	0	0	0	0	0	0	0	0	0	0	0	0	0	0	0	0	0	0	0
20154743	NA	NA	NA	NA	NA	NA	NA	NA	NA	NA	NA	NA	NA	NA	NA	NA	NA	NA	NA	NA	NA	NA	NA	NA	NA	NA	NA	NA	NA	NA	NA	NA	NA	NA	NA	NA	NA	NA	NA	NA	NA	NA	NA	NA	NA	NA	NA	NA	NA
20154762	0	0	0	0	0	0	0	0	0	0	0	0	0	0	0	0	0	0	0	0	0	0	0	0	0	0	0	0	0	0	0	0	0	0	0	0	0	0	0	0	0	0	0	0	0	0	0	0	0
20154773	0	0	0	0	0	0	0	0	0.2	0	0	0	0	0	0	0	0	0	0	0	0	0	0	0	0	0	0	0	0	0	0	0	0	0	0	0	0	0	0	0	0	0	0	0	0	0	0	0	0
20154780	0	0	0	0	0	0	0	0	0	0	0	0	0	0	0	0.4	0	0	0	0	0	0	0	0	0	0	0	0	0	0	0	0	0	0	0	0	0	0	0	0	0	0	0	0	0	0	0	0	0
20155335	0	0	0	0	0	0	0	0	0	0	0	0	0	0	0	0	0	0	0	0	0	0	0	0	0	0	0	0	0	0	0	0	0	0	0	0	0	0	0	0	0	0	0	0	0	0	0	0	0
20155353	0	0	0	0	0	0	0	0	0	0	0	0	0	0	0	0	0	0	0	0	0	0	0	0	0	0	0	0	0	0	0	0	0	0	0	0	0	0	0	0	0	0	0	0	0	0	0	0	0
20155395	0	0	0	0	0	0	0	0	0	0	0	0	0	0	0	0	0	0	0	0	0	0	0	0	0	0	0	0	0	0	0	0	0	0	0	0	0	0	0	0	0	0	0	0	0	0	0	0	0
20155509	NA	NA	NA	NA	NA	NA	NA	NA	NA	NA	NA	NA	NA	NA	NA	NA	NA	NA	NA	NA	NA	NA	NA	NA	NA	NA	NA	NA	NA	NA	NA	NA	NA	NA	NA	NA	NA	NA	NA	NA	NA	NA	NA	NA	NA	NA	NA	NA	NA
20155707	NA	NA	NA	NA	NA	NA	NA	NA	NA	NA	NA	NA	NA	NA	NA	NA	NA	NA	NA	NA	NA	NA	NA	NA	NA	NA	NA	NA	NA	NA	NA	NA	NA	NA	NA	NA	NA	NA	NA	NA	NA	NA	NA	NA	NA	NA	NA	NA	NA
20155708	NA	NA	NA	NA	NA	NA	NA	NA	NA	NA	NA	NA	NA	NA	NA	NA	NA	NA	NA	NA	NA	NA	NA	NA	NA	NA	NA	NA	NA	NA	NA	NA	NA	NA	NA	NA	NA	NA	NA	NA	NA	NA	NA	NA	NA	NA	NA	NA	NA
20155715	NA	NA	NA	NA	NA	NA	NA	NA	NA	NA	NA	NA	NA	NA	NA	NA	NA	NA	NA	NA	NA	NA	NA	NA	NA	NA	NA	NA	NA	NA	NA	NA	NA	NA	NA	NA	NA	NA	NA	NA	NA	NA	NA	NA	NA	NA	NA	NA	NA
20156142	0	0	0	0	0	0	0	0	0	0	0	0	0	0	0	0	0	0	0	0	0	0	0	0	0	0	0	0	0	0	0	0	0	0	0	0	0	0	0	0	0	0	0	0	0	0	0	0	0
20156540	NA	NA	NA	NA	NA	NA	NA	NA	NA	NA	NA	NA	NA	NA	NA	NA	NA	NA	NA	NA	NA	NA	NA	NA	NA	NA	NA	NA	NA	NA	NA	NA	NA	NA	NA	NA	NA	NA	NA	NA	NA	NA	NA	NA	NA	NA	NA	NA	NA
20156541	NA	NA	NA	NA	NA	NA	NA	NA	NA	NA	NA	NA	NA	NA	NA	NA	NA	NA	NA	NA	NA	NA	NA	NA	NA	NA	NA	NA	NA	NA	NA	NA	NA	NA	NA	NA	NA	NA	NA	NA	NA	NA	NA	NA	NA	NA	NA	NA	NA
20157017	NA	NA	NA	NA	NA	NA	NA	NA	NA	NA	NA	NA	NA	NA	NA	NA	NA	NA	NA	NA	NA	NA	NA	NA	NA	NA	NA	NA	NA	NA	NA	NA	NA	NA	NA	NA	NA	NA	NA	NA	NA	NA	NA	NA	NA	NA	NA	NA	NA
20157025	0	0	0	0	0	0	0	0	0	0	0	0	0	0	0	0	0	0	0	0	0	0	0	0	0	0	0	0	0	0	0	0	0	0	0	0	0	0	0	0	0	0	0	0	0	0	0	0	0
20157030	NA	NA	NA	NA	NA	NA	NA	NA	NA	NA	NA	NA	NA	NA	NA	NA	NA	NA	NA	NA	NA	NA	NA	NA	NA	NA	NA	NA	NA	NA	NA	NA	NA	NA	NA	NA	NA	NA	NA	NA	NA	NA	NA	NA	NA	NA	NA	NA	NA
20157077	0	0	0	0	0	0	0	0	0	0	0	0	0	0	0	0	0	0	0	0	0	0	0	0	0	0	0	0	0	0	0	0	0	0	0	0	0	0	0	0	0	0	0	0	0	0	0	0	0
20157099	0	0	0	0	0.2	0	0	0	0	0	0	0	0	0	0	0	0	0	0	0	0	0	0	0	0	0	0	0	0	0	0	0	0	0	0	0	0	0	0	0	0	0	0	0	0	0	0	0	0
20157469	0	0	0	0	0	0	0	0	0	0	0	0	0	0	0	0	0	0	0	0	0	0	0	0	0	0	0	0	0	0	0	0	0	0	0	0	0	0	0	0	0	0	0	0	0	0	0	0	0
20157475	0	0	0	0	0	0	0	0	0	0	0	0	0	0	0	0	0	0	0	0	0	0	0	0	0	0	0	0	0	0	0	0	0	0	0	0	0	0	0	0	0	0	0	0	0	0	0	0	0
20157835	NA	NA	NA	NA	NA	NA	NA	NA	NA	NA	NA	NA	NA	NA	NA	NA	NA	NA	NA	NA	NA	NA	NA	NA	NA	NA	NA	NA	NA	NA	NA	NA	NA	NA	NA	NA	NA	NA	NA	NA	NA	NA	NA	NA	NA	NA	NA	NA	NA
20157875	0	0	0	0	0.2	0	0	0	0	0	0	0	0	0	0	0	0	0	0	0	0	0	0	0	0	0	0	0	0	0	0	0	0	0	0	0	0	0	0	0	0	0	0	0	0	0	0	0	0
20158214	NA	NA	NA	NA	NA	NA	NA	NA	NA	NA	NA	NA	NA	NA	NA	NA	NA	NA	NA	NA	NA	NA	NA	NA	NA	NA	NA	NA	NA	NA	NA	NA	NA	NA	NA	NA	NA	NA	NA	NA	NA	NA	NA	NA	NA	NA	NA	NA	NA
20158221	0	0	0	0	0	0	0	0.2	0	0	0	0	0	0	0	0	0	0	0	0	0	0	0	0	0	0	0	0	0	0	0	0	0	0	0	0	0	0	0	0	0	0	0	0	0	0	0	0	0
20158236	0	0	0	0	0	0	0	0	0	0	0	0	0	0	0	0	0	0	0	0	0	0	0	0	0	0	0	0	0	0	0	0	0	0	0	0	0	0	0	0	0	0	0	0	0	0	0	0	0
20158254	0	0	0	0	0	0	0	0	0	0	0	0	0	0	0	0	0	0	0	0	0	0	0	0	0	0	0	0.1	0	0	0.3	0	0	0	0	0	0	0	0	0	0	0	0	0	0	0	0	0	0
20158287	0	0	0	0	0	0	0	0	0	0	0	0	0	0	0	0	0	0	0	0	0	0	0	0	0	0	0	0	0	0	0	0	0	0	0	0	0	0	0	0	0	0	0	0	0	0	0	0	0
20158638	0	0	0	0	0	0	0	0	0	0	0	0	0	0	0	0	0	0	0	0	0	0	0	0	0	0	0	0	0	0	0	0	0	0	0	0	0	0	0	0	0	0	0	0	0	0	0	0	0
20158699	0	0	0	0	0	0	0	0	0	0	0	0	0	0	0	0	0	0	0	0	0	0	0	0	0	0	0	0	0	0	0	0	0	0	0	0	0	0	0	0	0	0	0	0	0	0	0	0	0
20191544	0	0	0	0	0	0	0	0	0	0	0	0	0	0	0	0	0	0	0	0	0	0	0	0	0	0	0	0	0	0	0	0	0	0	0	0	0	0	0	0	0	0	0	0	0	0	0	0	0
20221612	0	0	0	0	0	0	0	0	0	0	0	0	0.116667	0.0333333	0.0166667	0	0	0	0	0	0	0	0	0	0	0	0	0	0	0	0	0	0	0	0	0	0	0	0	0	0	0	0	0	0	0	0	0	0
20221616	NA	NA	NA	NA	NA	NA	NA	NA	NA	NA	NA	NA	NA	NA	NA	NA	NA	NA	NA	NA	NA	NA	NA	NA	NA	NA	NA	NA	NA	NA	NA	NA	NA	NA	NA	NA	NA	NA	NA	NA	NA	NA	NA	NA	NA	NA	NA	NA	NA
20221622	NA	NA	NA	NA	NA	NA	NA	NA	NA	NA	NA	NA	NA	NA	NA	NA	NA	NA	NA	NA	NA	NA	NA	NA	NA	NA	NA	NA	NA	NA	NA	NA	NA	NA	NA	NA	NA	NA	NA	NA	NA	NA	NA	NA	NA	NA	NA	NA	NA
20221627	0	0	0	0	0	0	0	0	0	0	0	0	0.0666667	0	0	0.0666667	0	0	0	0	0	0	0	0	0	0	0	0	0	0	0	0	0	0	0	0	0	0	0	0	0	0	0	0	0	0	0	0	0
20221633	0	0	0	0	0	0	0	0	0	0	0	0	0	0	0	0	0	0	0	0	0	0	0	0	0	0	0	0	0	0	0	0	0	0	0	0	0	0	0	0	0	0	0	0	0	0	0	0	0
20221639	NA	NA	NA	NA	NA	NA	NA	NA	NA	NA	NA	NA	NA	NA	NA	NA	NA	NA	NA	NA	NA	NA	NA	NA	NA	NA	NA	NA	NA	NA	NA	NA	NA	NA	NA	NA	NA	NA	NA	NA	NA	NA	NA	NA	NA	NA	NA	NA	NA
20221644	0	0	0.4	0	0	0	0	0	0	0	0	0	0	0	0	0	0	0	0	0	0	0	0	0	0	0	0	0	0	0	0	0	0	0	0	0	0	0	0	0	0	0	0	0	0	0	0	0	0
20221650	0	0	0	0	0	0	0	0	0	0	0	0	0	0	0	0	0	0	0	0	0	0	0	0	0	0	0	0	0	0	0	0	0	0	0	0	0	0	0	0	0	0	0	0	0	0	0	0	0
20221655	0	0	0.2	0	0	0	0	0	0	0	0	0	0	0	0	0	0	0	0	0	0	0	0	0	0	0	0	0	0	0	0	0	0	0	0	0	0	0	0	0	0	0	0	0	0	0	0	0	0
20221667	NA	NA	NA	NA	NA	NA	NA	NA	NA	NA	NA	NA	NA	NA	NA	NA	NA	NA	NA	NA	NA	NA	NA	NA	NA	NA	NA	NA	NA	NA	NA	NA	NA	NA	NA	NA	NA	NA	NA	NA	NA	NA	NA	NA	NA	NA	NA	NA	NA
20221680	NA	NA	NA	NA	NA	NA	NA	NA	NA	NA	NA	NA	NA	NA	NA	NA	NA	NA	NA	NA	NA	NA	NA	NA	NA	NA	NA	NA	NA	NA	NA	NA	NA	NA	NA	NA	NA	NA	NA	NA	NA	NA	NA	NA	NA	NA	NA	NA	NA
20221687	0	0	0	0	0	0	0	0	0	0	0	0	0	0	0	0	0	0	0	0	0	0	0	0	0	0	0	0	0	0	0.4	0	0	0	0	0	0	0	0	0	0	0	0	0	0	0	0	0	0
20222420	0	0	0.08	0	0	0	0	0	0	0	0	0	0	0	0	0	0	0	0	0	0	0	0	0	0	0	0	0	0	0	0	0	0	0	0	0	0	0	0	0	0	0	0	0	0	0	0	0	0
20222435	0	0	0.0285714	0.0285714	0	0	0	0	0	0	0	0	0	0	0	0.0285714	0	0	0	0	0	0	0	0	0	0	0	0	0	0	0	0	0	0	0	0	0	0	0	0	0	0	0	0	0	0	0	0	0
20222442	0	0	0	0	0	0	0	0	0	0	0	0	0	0	0	0	0.2	0	0	0	0	0	0	0	0	0	0	0	0	0	0	0	0	0	0	0	0	0	0	0	0	0	0	0	0	0	0	0	0
20222445	0	0	0	0	0	0	0	0	0	0	0	0	0	0	0	0	0	0	0	0	0	0	0	0	0	0	0	0	0	0	0	0	0	0	0	0	0	0	0	0	0	0	0	0	0	0	0	0	0
20222447	0	0	0	0	0.0285714	0	0	0	0	0	0	0	0	0	0	0	0	0	0	0.0285714	0	0	0	0	0	0	0	0	0	0	0.0285714	0	0	0	0	0	0	0	0	0	0	0	0	0	0	0	0	0	0
20222459	0	0	0	0	0	0	0	0	0	0	0	0	0	0	0	0	0	0	0	0	0	0	0	0	0	0	0	0	0	0	0	0	0	0	0	0	0	0	0	0	0	0	0	0	0	0	0	0	0
20222499	NA	NA	NA	NA	NA	NA	NA	NA	NA	NA	NA	NA	NA	NA	NA	NA	NA	NA	NA	NA	NA	NA	NA	NA	NA	NA	NA	NA	NA	NA	NA	NA	NA	NA	NA	NA	NA	NA	NA	NA	NA	NA	NA	NA	NA	NA	NA	NA	NA
20224911	0	0	0	0	0	0	0	0	0	0	0	0	0	0	0	0	0	0	0	0	0	0	0	0	0	0	0	0	0	0	0	0	0	0	0	0	0	0	0	0	0	0	0	0	0	0	0	0	0
20224947	0	0	0	0	0	0	0	0	0	0	0	0	0	0	0	0	0	0	0	0	0	0	0	0	0	0	0	0	0	0	0	0	0	0	0	0	0	0	0	0	0	0	0	0	0	0	0	0	0
20224959	0	0	0	0	0	0	0	0	0	0	0	0	0	0	0	0	0	0	0	0	0	0	0	0	0	0	0	0	0	0	0	0	0	0	0	0	0	0	0	0	0	0	0	0	0	0	0	0	0
20224983	0	0	0	0	0	0	0	0	0	0	0	0	0	0	0	0	0	0	0	0	0	0	0	0	0	0	0	0	0	0	0	0	0	0	0	0	0	0	0	0	0	0	0	0.2	0	0	0	0	0
20225611	0	0	0	0	0	0	0	0	0	0	0	0	0	0	0	0	0	0	0	0	0	0	0	0	0	0	0	0	0	0	0	0	0	0	0	0	0	0	0	0	0	0	0	0	0	0	0	0	0
20225683	0	0	0	0	0.1	0	0	0	0	0	0	0	0	0	0	0	0	0	0	0	0	0	0	0	0	0.1	0	0.1	0	0	0	0	0	0	0	0	0	0	0	0	0	0	0	0	0	0	0	0	0
20225689	0	0	0	0	0	0	0	0	0	0	0	0	0	0	0	0	0	0	0	0	0	0	0	0	0	0	0	0	0	0	0	0	0	0	0	0	0	0	0	0	0	0	0	0	0	0	0	0	0
20225696	0	0	0	0	0	0	0	0	0	0	0	0	0	0	0	0	0	0	0	0	0	0	0	0	0.025	0.1	0	0	0	0.025	0.1	0	0	0	0	0	0	0	0	0	0	0	0	0	0	0	0	0	0
20226613	0	0	0	0	0	0	0	0	0	0	0	0	0	0	0	0	0	0	0	0	0	0	0	0	0	0	0	0	0	0	0	0	0	0	0	0	0	0	0	0	0	0	0	0	0	0	0	0	0
20226615	NA	NA	NA	NA	NA	NA	NA	NA	NA	NA	NA	NA	NA	NA	NA	NA	NA	NA	NA	NA	NA	NA	NA	NA	NA	NA	NA	NA	NA	NA	NA	NA	NA	NA	NA	NA	NA	NA	NA	NA	NA	NA	NA	NA	NA	NA	NA	NA	NA
20226619	0	0	0.0214286	0	0	0	0	0	0	0	0	0	0.0047619	0	0	0	0.0357143	0.0690476	0	0.0047619	0	0	0	0	0	0	0	0	0	0	0.00238095	0	0	0	0	0	0	0	0	0	0	0	0	0	0	0.00238095	0	0	0
20226628	0	0	0.00952381	0	0	0	0	0	0	0	0	0	0	0.00952381	0	0	0.0380952	0	0	0.0285714	0	0	0	0	0	0	0	0	0	0	0.00952381	0	0	0	0	0	0	0	0	0	0	0	0	0	0	0	0	0	0
20226638	0	0	0.0333333	0	0	0	0	0	0	0	0	0	0	0	0	0	0.00833333	0.0166667	0	0.0166667	0	0	0	0	0	0	0	0	0	0	0	0	0	0	0	0	0	0	0	0	0	0	0	0	0	0	0	0	0
20226647	0	0	0.00645161	0	0	0	0	0	0	0	0	0	0	0	0	0	0.00322581	0.129032	0	0.0129032	0	0	0	0	0	0	0	0	0	0	0	0	0	0	0	0	0	0	0	0	0	0	0	0	0	0	0	0	0
20226657	0	0	0	0	0	0	0	0	0	0	0	0	0	0	0	0	0	0	0	0	0	0	0	0	0	0	0	0	0	0	0	0	0	0	0	0	0	0	0	0	0	0	0	0	0	0	0	0	0
20226666	0	0	0.133333	0	0	0.00606061	0	0.00606061	0	0	0	0	0	0	0	0	0	0	0	0	0	0	0	0	0	0	0	0	0	0	0	0	0	0	0	0	0.00606061	0	0	0	0	0	0	0	0	0	0	0	0
20226670	0	0	0.0888889	0	0.0333333	0	0	0	0	0	0	0	0	0.0444444	0	0	0	0	0	0	0	0	0	0	0	0	0	0	0	0	0	0	0	0	0	0	0	0	0	0	0	0	0	0	0	0	0	0	0
20226676	0	0	0	0	0	0	0	0	0	0	0	0	0	0	0	0	0	0.05	0	0	0	0	0	0	0	0	0	0	0	0	0	0	0	0	0	0	0	0	0	0	0	0	0	0	0	0	0	0	0
20226685	0	0	0	0	0	0	0	0	0	0	0	0	0	0	0	0	0	0.0666667	0	0	0	0	0	0	0	0	0	0	0	0	0	0	0	0	0	0	0	0	0	0	0	0	0	0	0	0	0	0	0
20229031	0	0	0	0	0	0	0	0	0	0	0	0	0	0	0	0	0	0	0	0	0	0	0	0	0	0	0	0	0	0	0	0	0	0	0	0	0	0	0	0	0	0	0	0	0	0	0	0	0
20229415	0	0	0	0	0	0	0	0	0	0	0	0	0	0	0	0.0666667	0	0	0	0	0	0	0	0	0	0	0	0	0	0	0	0	0	0	0	0	0	0	0	0	0	0	0	0	0	0	0	0	0
20229431	0	0	0	0	0	0	0	0	0.2	0	0	0	0	0	0	0	0	0	0	0	0	0	0	0	0	0	0	0	0	0	0	0	0	0	0	0	0	0	0	0	0	0	0	0	0	0	0	0	0
20229447	0	0	0	0	0	0	0	0	0	0	0	0	0	0	0	0	0	0	0	0	0	0	0	0	0	0	0	0	0	0	0.1	0	0	0	0	0	0	0	0	0	0	0	0	0	0	0	0	0	0
20229479	0	0	0	0	0	0	0	0	0	0	0	0	0	0	0	0	0	0	0	0	0	0	0	0	0	0	0	0	0	0	0	0	0	0	0	0	0	0	0	0	0	0	0	0	0	0	0	0	0
20464315	0	0	0	0	0	0	0	0	0	0	0	0	0	0	0	0	0	0	0	0	0	0	0	0	0	0	0	0	0	0	0	0	0	0	0	0	0	0	0	0	0	0	0	0	0	0	0	0	0
20464331	0	0	0	0	0	0	0	0	0	0	0	0	0	0	0	0	0	0	0	0	0	0	0	0	0	0	0	0	0	0	0	0	0	0	0	0	0	0	0	0	0	0	0	0	0	0	0	0	0
20464347	0	0	0	0	0	0	0	0	0	0	0	0	0	0.0153846	0	0	0	0	0	0	0	0	0	0	0	0	0	0	0	0	0	0	0	0	0	0	0	0	0	0	0	0	0	0	0	0	0	0	0
20464363	0	0	0	0	0	0	0	0	0	0	0	0	0	0	0	0	0	0	0	0	0	0	0	0	0	0	0	0	0	0	0	0	0	0	0	0	0	0	0	0	0	0	0	0	0	0	0	0	0
20464379	0	0	0	0	0	0	0	0	0	0	0	0	0	0	0	0	0	0	0	0	0	0	0	0	0	0	0	0	0	0	0	0	0	0	0	0	0	0	0	0	0	0	0	0	0	0	0	0	0
20464915	NA	NA	NA	NA	NA	NA	NA	NA	NA	NA	NA	NA	NA	NA	NA	NA	NA	NA	NA	NA	NA	NA	NA	NA	NA	NA	NA	NA	NA	NA	NA	NA	NA	NA	NA	NA	NA	NA	NA	NA	NA	NA	NA	NA	NA	NA	NA	NA	NA
20464963	0	0	0	0	0	0	0	0	0	0	0	0	0	0	0	0	0	0	0	0	0	0	0	0	0	0	0	0	0	0	0	0	0	0	0	0	0	0	0	0	0	0	0	0	0	0	0	0	0
20464975	NA	NA	NA	NA	NA	NA	NA	NA	NA	NA	NA	NA	NA	NA	NA	NA	NA	NA	NA	NA	NA	NA	NA	NA	NA	NA	NA	NA	NA	NA	NA	NA	NA	NA	NA	NA	NA	NA	NA	NA	NA	NA	NA	NA	NA	NA	NA	NA	NA
20466123	0	0	0	0	0	0	0	0	0	0	0	0	0	0	0	0	0	0	0	0	0	0	0	0	0	0	0	0	0	0	0	0	0	0	0	0	0	0	0	0	0	0	0	0	0	0	0	0	0
20466147	0	0	0	0	0	0	0	0	0	0	0	0	0	0	0	0	0	0	0	0	0	0	0	0	0	0	0	0	0	0	0	0	0	0	0	0	0	0	0	0	0	0	0	0	0	0	0	0	0
20466171	0	0	0	0	0	0	0	0	0	0	0	0	0	0	0	0	0	0	0	0	0	0	0	0	0	0	0	0	0	0	0	0	0	0	0	0	0	0	0	0	0	0	0	0	0	0	0	0	0
20466531	NA	NA	NA	NA	NA	NA	NA	NA	NA	NA	NA	NA	NA	NA	NA	NA	NA	NA	NA	NA	NA	NA	NA	NA	NA	NA	NA	NA	NA	NA	NA	NA	NA	NA	NA	NA	NA	NA	NA	NA	NA	NA	NA	NA	NA	NA	NA	NA	NA
20466579	0	0	0	0	0	0	0	0	0	0	0	0	0	0	0	0	0	0	0	0	0	0	0	0	0	0	0	0	0	0	0	0	0	0	0	0	0	0	0	0	0	0	0	0	0	0	0	0	0
20466719	0	0	0	0	0	0	0	0	0	0	0	0	0	0	0	0	0	0	0	0	0	0	0	0	0	0	0	0	0	0	0	0	0	0	0	0	0	0	0	0	0	0	0	0	0	0	0	0	0
20466742	0	0	0	0	0	0	0	0	0	0	0	0	0	0	0	0	0	0	0	0	0	0	0	0	0	0	0	0	0	0	0	0	0	0	0	0	0	0	0	0	0	0	0	0	0	0	0	0	0
20466763	0	0	0	0	0	0	0	0	0	0	0	0	0	0	0	0	0	0	0	0	0	0	0	0	0	0	0	0	0	0	0	0	0	0	0	0	0	0	0	0	0	0	0	0	0	0	0	0	0
20467023	0	0	0	0	0	0	0	0	0	0	0	0	0	0	0	0	0	0	0	0	0	0	0	0	0	0	0	0	0	0	0	0	0	0	0.0153846	0	0	0	0	0	0	0	0	0	0	0	0	0	0
20467035	0	0	0	0	0	0	0	0	0	0	0	0	0	0	0	0	0	0	0	0	0	0	0	0	0	0	0	0	0	0	0	0	0	0	0	0	0	0	0	0	0	0	0	0	0	0	0	0	0
20467047	0	0	0	0	0	0	0	0	0	0	0	0	0	0	0	0	0	0	0	0	0	0	0	0	0	0	0	0	0	0	0	0	0	0	0	0	0	0	0	0	0	0	0	0	0	0	0	0	0
20467059	0	0	0	0	0	0	0	0	0	0	0	0	0	0	0	0	0	0	0	0	0	0	0	0	0	0	0	0	0	0	0	0	0	0	0	0	0	0	0	0	0	0	0	0	0	0	0	0	0
20467719	0	0	0	0	0	0	0	0	0	0	0	0	0	0	0	0	0	0	0	0	0	0	0	0	0	0	0	0	0	0	0	0	0	0	0	0	0	0	0	0	0	0	0	0	0	0	0	0	0
20467738	0	0	0	0	0	0	0	0	0	0	0	0	0	0	0	0	0	0	0	0	0	0	0	0	0	0	0	0	0	0	0	0	0	0	0	0	0	0	0	0	0	0	0	0	0	0	0	0	0
20467757	0	0	0	0	0	0	0	0	0	0	0	0	0	0	0	0	0	0	0	0	0	0	0	0	0	0	0	0	0	0	0	0	0	0	0	0	0	0	0	0	0	0	0	0	0	0	0	0	0
20467776	0	0	0	0	0	0	0	0	0	0	0	0	0	0	0	0	0	0	0	0	0	0	0	0	0	0	0	0	0	0	0	0	0	0	0	0	0	0	0	0	0	0	0	0	0	0	0	0	0
20467789	0	0	0	0	0	0	0	0	0	0	0	0	0	0	0	0	0	0	0	0	0	0	0	0	0	0	0	0	0	0	0	0	0	0	0	0	0	0	0	0	0	0	0	0	0	0	0	0	0
20468038	0	0	0	0	0	0	0	0	0	0	0	0	0	0	0	0	0	0	0	0	0	0	0	0	0	0	0	0	0	0	0	0	0	0	0	0	0	0	0	0	0	0	0	0	0	0	0	0	0
20468057	0	0	0	0	0	0	0	0	0	0	0	0	0	0	0	0	0	0	0	0	0	0	0	0	0	0	0	0	0	0	0	0	0	0	0	0	0	0	0	0	0	0	0	0	0	0	0	0	0
20468076	0	0	0	0	0	0	0	0	0	0	0	0	0	0	0	0	0	0	0	0	0	0	0	0	0	0	0	0	0	0	0	0	0	0	0	0	0	0	0	0	0	0	0	0	0	0	0	0	0
20517323	0	0	0	0	0	0	0	0	0	0	0	0	0	0	0	0	0	0	0	0	0	0	0	0	0	0	0	0	0	0	0	0	0	0	0	0	0	0	0	0	0	0	0	0	0	0	0	0	0
20752159	0	0	0	0	0	0	0	0	0	0	0	0	0	0	0	0	0	0	0	0	0	0	0	0	0	0	0	0	0	0	0	0	0	0	0	0	0	0	0	0	0	0	0	0	0	0	0	0	0
20840711	0	0	0	0	0	0	0	0	0	0	0	0	0	0	0	0	0	0	0	0	0	0	0	0	0	0	0	0	0	0	0	0	0	0	0	0	0	0	0	0	0	0	0	0	0	0	0	0	0
20840723	0	0	0	0	0	0	0	0	0	0	0	0	0	0	0	0	0	0	0	0	0	0	0	0	0	0	0	0	0	0	0	0	0	0	0	0	0	0	0	0	0	0	0	0	0	0	0	0	0
20840735	0	0	0	0	0	0	0	0	0	0	0	0	0	0	0	0	0	0	0	0	0	0	0	0	0	0	0	0	0	0	0	0	0	0	0	0	0	0	0	0	0	0	0	0	0	0	0	0	0
20840747	0	0	0	0	0	0	0	0	0	0	0	0	0	0	0	0	0	0	0	0	0	0	0	0	0	0	0	0	0	0	0	0	0	0	0	0	0	0	0	0	0	0	0	0	0	0	0	0	0
20840759	0	0	0	0	0	0	0	0	0	0	0	0	0	0	0	0	0	0	0	0	0	0	0	0	0	0	0	0	0	0	0	0	0	0	0	0	0	0	0	0	0	0	0	0	0	0	0	0	0
20840771	0	0	0	0	0	0	0	0	0	0	0	0	0	0	0	0	0	0	0	0	0	0	0	0	0	0	0	0	0	0	0	0	0	0	0	0	0	0	0	0	0	0	0	0	0	0	0	0	0
20840783	0	0	0	0	0	0	0	0	0	0	0	0	0	0	0	0	0	0	0	0	0	0	0	0	0	0	0	0	0	0	0	0	0	0	0	0	0	0	0	0	0	0	0	0	0	0	0	0	0
20842115	0	0	0	0	0	0	0	0	0	0	0	0	0	0	0	0	0	0	0	0	0	0	0	0	0	0	0	0	0	0	0	0	0	0	0	0	0	0	0	0	0	0	0	0	0	0	0	0	0
20842131	NA	NA	NA	NA	NA	NA	NA	NA	NA	NA	NA	NA	NA	NA	NA	NA	NA	NA	NA	NA	NA	NA	NA	NA	NA	NA	NA	NA	NA	NA	NA	NA	NA	NA	NA	NA	NA	NA	NA	NA	NA	NA	NA	NA	NA	NA	NA	NA	NA
20842147	0	0	0	0	0	0	0	0	0	0	0	0	0	0	0	0	0	0	0	0	0	0	0	0	0	0	0	0	0	0	0	0	0	0	0	0	0	0	0	0	0	0	0	0	0	0	0	0	0
20842163	0	0	0	0	0	0	0	0	0	0	0	0	0	0	0	0	0	0	0	0	0	0	0	0	0	0	0	0	0	0	0	0	0	0	0	0	0	0	0	0	0	0	0	0	0	0	0	0	0
20842538	0	0	0	0	0	0	0	0	0	0	0	0	0	0	0	0	0	0	0	0	0	0	0	0	0	0	0	0	0	0	0	0	0	0	0	0	0	0	0	0	0	0	0	0	0	0	0	0	0
20842557	0	0	0	0	0	0	0	0	0	0	0	0	0	0	0	0	0	0	0	0	0	0	0	0	0	0	0	0	0	0	0	0	0	0	0	0	0	0	0	0	0	0	0	0	0	0	0	0	0
20842923	0	0	0	0	0	0	0	0	0	0	0	0	0	0	0	0	0	0	0	0	0	0	0	0	0	0	0	0	0	0	0	0	0	0	0	0	0	0	0	0	0	0	0	0	0	0	0	0	0
20842947	0	0	0	0	0	0	0	0	0	0	0	0	0	0	0	0	0	0	0	0	0	0	0	0	0	0	0	0.0133333	0	0	0	0	0	0	0	0	0	0	0	0	0	0	0	0	0	0	0	0	0
20842971	0	0	0	0	0	0	0	0	0	0	0	0	0	0	0	0	0	0	0	0	0	0	0	0	0	0	0	0	0	0	0	0	0	0	0	0	0	0	0	0	0	0	0	0	0	0	0	0	0
20843619	0	0	0	0	0	0	0	0	0	0	0	0	0	0	0	0	0	0	0	0	0	0	0	0	0	0	0	0	0	0	0	0	0	0	0	0	0	0	0	0	0	0	0	0	0	0	0	0	0
20843638	0	0	0	0	0	0	0	0	0	0	0	0	0	0	0	0	0	0	0	0	0	0	0	0	0	0	0	0	0	0	0	0	0	0	0	0	0	0	0	0	0	0	0	0	0	0	0	0	0
20843657	0	0	0	0	0	0	0	0	0	0	0	0	0	0	0	0	0	0	0	0	0	0	0	0	0	0	0	0	0	0	0	0	0	0	0	0	0	0	0	0	0	0	0	0	0	0	0	0	0
20843676	0	0	0	0	0	0	0	0	0	0	0	0	0	0	0	0	0	0	0	0	0	0	0	0	0	0	0	0	0	0	0	0	0	0	0	0	0	0	0	0	0	0	0	0	0	0	0	0	0
20844719	0	0	0	0	0	0	0	0	0	0	0	0	0	0	0	0	0	0	0	0	0	0	0	0	0	0	0	0	0	0	0	0	0	0	0	0	0	0	0	0	0	0	0	0	0	0	0	0	0
20844738	0	0	0	0	0	0	0	0	0	0	0	0	0	0	0	0	0	0	0	0	0	0	0	0	0	0	0	0	0	0	0	0	0	0	0	0	0	0	0	0	0	0	0	0	0	0	0	0	0
20844757	0	0	0	0	0	0	0	0	0	0	0	0	0	0	0	0	0	0	0	0	0	0	0	0	0	0	0	0	0	0	0	0	0	0	0	0	0	0	0	0	0	0	0	0	0	0	0	0	0
20844776	0	0	0	0	0	0	0	0	0	0	0	0	0	0	0	0	0	0	0	0	0	0	0	0	0	0	0	0	0	0	0	0	0	0	0	0	0	0	0	0	0	0	0	0	0	0	0	0	0
20845867	0	0	0	0	0	0	0	0	0	0	0	0	0	0	0	0	0	0	0	0	0	0	0	0	0	0	0	0	0	0	0	0	0	0	0	0	0	0	0	0	0	0	0	0	0	0	0	0	0
20845881	NA	NA	NA	NA	NA	NA	NA	NA	NA	NA	NA	NA	NA	NA	NA	NA	NA	NA	NA	NA	NA	NA	NA	NA	NA	NA	NA	NA	NA	NA	NA	NA	NA	NA	NA	NA	NA	NA	NA	NA	NA	NA	NA	NA	NA	NA	NA	NA	NA
20847557	NA	NA	NA	NA	NA	NA	NA	NA	NA	NA	NA	NA	NA	NA	NA	NA	NA	NA	NA	NA	NA	NA	NA	NA	NA	NA	NA	NA	NA	NA	NA	NA	NA	NA	NA	NA	NA	NA	NA	NA	NA	NA	NA	NA	NA	NA	NA	NA	NA
20847823	0	0	0	0	0	0	0	0	0	0	0	0	0	0	0	0	0	0	0	0	0	0	0	0	0	0	0	0	0	0	0	0	0	0	0	0	0	0	0	0	0	0	0	0	0	0	0	0	0
20847846	0	0	0	0	0.00869565	0	0	0	0	0	0	0	0	0	0	0	0	0	0	0	0	0	0	0	0	0	0	0	0	0	0	0	0	0	0	0	0	0	0	0	0	0	0	0	0	0	0	0	0
20847871	0	0	0	0	0	0	0	0	0	0	0	0	0	0	0	0	0	0	0	0	0	0	0	0	0	0	0	0	0	0	0	0	0	0	0	0	0	0	0	0	0	0	0	0	0	0	0	0	0
20848799	NA	NA	NA	NA	NA	NA	NA	NA	NA	NA	NA	NA	NA	NA	NA	NA	NA	NA	NA	NA	NA	NA	NA	NA	NA	NA	NA	NA	NA	NA	NA	NA	NA	NA	NA	NA	NA	NA	NA	NA	NA	NA	NA	NA	NA	NA	NA	NA	NA
30261417	0	0	0	0	0	0	0	0	0	0	0	0	0	0	0	0	0	0	0	0	0	0	0.4	0	0	0	0	0	0	0	0	0	0	0	0	0	0	0	0	0	0	0	0	0	0	0	0	0	0
30261429	0	0	0	0	0	0	0	0	0	0	0	0	0	0	0	0	0	0	0	0	0	0	0	0	0	0	0	0	0	0	0	0	0	0	0	0	0	0	0	0	0	0	0	0	0	0	0	0	0
30295652	0	0	0	0	0	0	0	0	0	0	0	0	0	0	0	0	0	0	0	0	0	0	0	0	0	0	0	0	0	0	0	0	0	0	0	0	0	0	0	0	0	0	0	0	0	0	0	0	0
30333299	0	0	0	0	0	0	0	0	0	0	0	0	0	0	0	0	0	0	0	0	0	0	0	0	0	0	0	0	0	0	0	0	0	0	0	0	0	0	0	0	0	0	0	0	0	0	0	0	0
30338699	NA	NA	NA	NA	NA	NA	NA	NA	NA	NA	NA	NA	NA	NA	NA	NA	NA	NA	NA	NA	NA	NA	NA	NA	NA	NA	NA	NA	NA	NA	NA	NA	NA	NA	NA	NA	NA	NA	NA	NA	NA	NA	NA	NA	NA	NA	NA	NA	NA
30353294	0	0	0	0	0.2	0	0	0.4	0	0	0	0	0	0	0	0	0	0	0	0	0	0	0	0	0	0	0	0	0	0	0	0	0	0	0	0	0	0	0	0	0	0	0	0	0	0	0	0	0
30489267	0	0	0	0	0	0	0	0.2	0	0	0	0	0	0	0	0	0	0	0	0	0	0	0	0	0	0	0	0	0	0	0	0	0	0	0	0	0	0	0	0	0	0	0	0	0	0	0	0	0
30615299	NA	NA	NA	NA	NA	NA	NA	NA	NA	NA	NA	NA	NA	NA	NA	NA	NA	NA	NA	NA	NA	NA	NA	NA	NA	NA	NA	NA	NA	NA	NA	NA	NA	NA	NA	NA	NA	NA	NA	NA	NA	NA	NA	NA	NA	NA	NA	NA	NA
30617215	0	0	0	0	0	0	0	0	0	0	0	0	0	0	0	0	0	0	0	0	0	0	0	0	0	0	0	0	0	0	0	0	0	0	0	0	0	0	0	0	0	0	0	0	0	0	0	0	0
30824795	NA	NA	NA	NA	NA	NA	NA	NA	NA	NA	NA	NA	NA	NA	NA	NA	NA	NA	NA	NA	NA	NA	NA	NA	NA	NA	NA	NA	NA	NA	NA	NA	NA	NA	NA	NA	NA	NA	NA	NA	NA	NA	NA	NA	NA	NA	NA	NA	NA
30932585	0	0	0	0	0.2	0	0	0	0	0	0	0	0	0	0	0	0	0	0	0	0	0	0	0	0	0	0	0	0	0	0	0	0	0	0	0	0	0	0	0	0	0	0	0	0	0	0	0	0
40576085	0	0	0	0	0	0	0	0	0	0	0	0	0	0	0	0	0	0	0	0	0	0	0	0	0	0	0	0	0	0	0	0	0	0	0	0	0	0	0	0	0	0	0	0	0	0	0	0	0
40652847	NA	NA	NA	NA	NA	NA	NA	NA	NA	NA	NA	NA	NA	NA	NA	NA	NA	NA	NA	NA	NA	NA	NA	NA	NA	NA	NA	NA	NA	NA	NA	NA	NA	NA	NA	NA	NA	NA	NA	NA	NA	NA	NA	NA	NA	NA	NA	NA	NA
40657699	NA	NA	NA	NA	NA	NA	NA	NA	NA	NA	NA	NA	NA	NA	NA	NA	NA	NA	NA	NA	NA	NA	NA	NA	NA	NA	NA	NA	NA	NA	NA	NA	NA	NA	NA	NA	NA	NA	NA	NA	NA	NA	NA	NA	NA	NA	NA	NA	NA
50108599	NA	NA	NA	NA	NA	NA	NA	NA	NA	NA	NA	NA	NA	NA	NA	NA	NA	NA	NA	NA	NA	NA	NA	NA	NA	NA	NA	NA	NA	NA	NA	NA	NA	NA	NA	NA	NA	NA	NA	NA	NA	NA	NA	NA	NA	NA	NA	NA	NA
50647586	NA	NA	NA	NA	NA	NA	NA	NA	NA	NA	NA	NA	NA	NA	NA	NA	NA	NA	NA	NA	NA	NA	NA	NA	NA	NA	NA	NA	NA	NA	NA	NA	NA	NA	NA	NA	NA	NA	NA	NA	NA	NA	NA	NA	NA	NA	NA	NA	NA
50690919	NA	NA	NA	NA	NA	NA	NA	NA	NA	NA	NA	NA	NA	NA	NA	NA	NA	NA	NA	NA	NA	NA	NA	NA	NA	NA	NA	NA	NA	NA	NA	NA	NA	NA	NA	NA	NA	NA	NA	NA	NA	NA	NA	NA	NA	NA	NA	NA	NA
50696351	0	0	0.2	0	0	0	0	0	0	0	0	0	0	0	0	0	0	0	0	0	0	0	0	0	0	0	0	0	0	0	0	0	0	0	0	0	0	0	0	0	0	0	0	0	0	0	0	0	0
50884476	NA	NA	NA	NA	NA	NA	NA	NA	NA	NA	NA	NA	NA	NA	NA	NA	NA	NA	NA	NA	NA	NA	NA	NA	NA	NA	NA	NA	NA	NA	NA	NA	NA	NA	NA	NA	NA	NA	NA	NA	NA	NA	NA	NA	NA	NA	NA	NA	NA
55855817	0	0	0	0	0	0	0	0	0	0	0	0	0	0	0	0	0	0	0	0	0	0	0	0	0	0	0	0	0	0	0	0	0	0	0	0	0	0	0	0	0	0	0	0	0	0	0	0	0
60586595	NA	NA	NA	NA	NA	NA	NA	NA	NA	NA	NA	NA	NA	NA	NA	NA	NA	NA	NA	NA	NA	NA	NA	NA	NA	NA	NA	NA	NA	NA	NA	NA	NA	NA	NA	NA	NA	NA	NA	NA	NA	NA	NA	NA	NA	NA	NA	NA	NA
[truncated: 173 more columns]

## Sheet: mobile_phone
	10065126	10795869	20030463	20031415	20031499	20035163	20037319	20037357	20037376	20038976	20039119	20039176	20129490	20150415	20150419	20150428	20150438	20150457	20150466	20150476	20150485	20150495	20150601	20150602	20150603	20150811	20150812	20150818	20150844	20150850	20150863	20150869	20150875	20150882	20150888	20150899	20151017	20151018	20151019	20151035	20151217	20151219	20151238	20151247	20151250	20151257	20151266	20151276	20151285
10065126	0.983947	0.000380031	1.37361e-05	0	1.83148e-05	9.15738e-06	0	4.57869e-06	4.12082e-05	4.57869e-06	0	0	0	4.57869e-06	2.28935e-05	0	9.15738e-06	0	0	4.57869e-06	0	1.37361e-05	9.15738e-06	6.86804e-05	9.15738e-06	0	4.57869e-06	4.57869e-06	4.57869e-06	0	4.57869e-06	0	0	0	0	1.83148e-05	9.15738e-06	0	0	2.28935e-05	0	0	0	0	0	0	0	0	0
10795869	0.00016334	0.996926	0	1.42034e-06	0	0	0	0	5.68137e-06	5.68137e-06	0	0	0	0	5.68137e-06	0	4.26103e-06	2.84069e-06	0	0	0	0	2.84069e-06	3.26679e-05	1.13627e-05	0	0	0	0	0	0	0	0	0	1.42034e-06	0	0	1.42034e-06	0	2.84069e-06	0	1.42034e-06	2.84069e-06	0	0	0	0	0	0
20030463	1.80091e-05	0	0.745531	0.000261132	0.0143713	0.0647067	0.00108955	0.000612309	0.00433119	0.0035658	0.00306155	0.000126064	0	9.00455e-06	3.60182e-05	2.70136e-05	9.00455e-06	0	2.70136e-05	2.70136e-05	1.80091e-05	1.80091e-05	0.00325965	0.00528567	0.000288146	1.80091e-05	4.50227e-05	9.905e-05	1.80091e-05	0	0.000243123	2.70136e-05	3.60182e-05	0.000117059	0	0.000261132	7.20364e-05	0	0	0.000135068	0	1.80091e-05	5.40273e-05	9.00455e-06	3.60182e-05	0	4.50227e-05	6.30318e-05	9.00455e-06
20031415	0	0.000123244	0.00345083	0.406335	0.29862	0.00406704	0.000123244	0.000123244	0.000246488	0.126202	0.0157752	0.00764111	0	0	0	0	0	0	0	0.000123244	0	0	0.000123244	0.00184866	0.000246488	0	0	0	0.000123244	0	0.000123244	0	0	0.000123244	0	0	0.000123244	0	0	0.000616219	0	0.000246488	0	0	0.000123244	0	0.000123244	0	0
20031499	7.83569e-06	1.95892e-06	0.00312252	0.00499525	0.757372	0.00396682	0.000521073	0.000481895	0.00164745	0.0652438	0.00787095	0.00533806	1.37124e-05	0.000119494	8.03158e-05	0.000207646	5.0932e-05	4.50552e-05	7.05212e-05	4.50552e-05	0.000125371	2.15481e-05	0.000722842	0.00317737	0.000432922	9.01104e-05	4.8973e-05	0.000229194	0.000205687	6.26855e-05	9.40282e-05	9.40282e-05	0.000191974	0.0001097	3.91784e-06	0.000378072	0.000237029	7.83569e-06	2.93838e-05	0.000268372	5.87676e-05	7.4439e-05	7.05212e-05	1.76303e-05	7.83569e-05	1.76303e-05	7.63979e-05	3.72195e-05	2.15481e-05
20035163	6.09381e-06	0	0.0436378	0.000103595	0.0121632	0.710788	0.000298597	0.000481411	0.00149298	0.00396707	0.0521508	0.000134064	0	1.82814e-05	2.43752e-05	6.70319e-05	4.26567e-05	1.82814e-05	1.21876e-05	1.21876e-05	1.21876e-05	0	0.000134064	0.00126751	0.00038391	3.0469e-05	7.92195e-05	0.000195002	0.000170627	4.26567e-05	0.00012797	5.48443e-05	4.87505e-05	7.92195e-05	0	0.000237659	9.75009e-05	0	2.43752e-05	0.000170627	4.26567e-05	6.70319e-05	0.000121876	2.43752e-05	2.43752e-05	3.65628e-05	5.48443e-05	6.09381e-06	3.65628e-05
20037319	3.75615e-05	0	0.00495812	3.75615e-05	0.00942794	0.00180295	0.373925	0.00251662	0.0838748	0.00105172	0.000187808	7.5123e-05	0	0	0	0	0	0	0	0	0	0	0	0.000413177	3.75615e-05	0	0	0.000150246	0	3.75615e-05	0.000300492	0	0	0	0	3.75615e-05	0	0	0	7.5123e-05	0	0	3.75615e-05	0	3.75615e-05	0	0	0	0
20037357	4.71915e-05	0	0.000684277	2.35958e-05	0.00326801	0.000825852	0.000589894	0.600017	0.00202924	0.000483713	0.000176968	4.71915e-05	0	3.53936e-05	0.000106181	0.000117979	1.17979e-05	0.000342138	8.25852e-05	3.53936e-05	4.71915e-05	1.17979e-05	0.000200564	0.00061349	0.000235958	3.53936e-05	4.71915e-05	0.000188766	5.89894e-05	3.53936e-05	5.89894e-05	5.89894e-05	1.17979e-05	0.000106181	1.17979e-05	0.000625288	0.000117979	0	0	0.00022416	2.35958e-05	5.89894e-05	4.71915e-05	1.17979e-05	4.71915e-05	4.71915e-05	0.000153372	2.35958e-05	1.17979e-05
20037376	0.000235465	5.4338e-05	0.0084405	3.62253e-05	0.0140011	0.00451005	0.0406086	0.00387611	0.512751	0.0011411	0.00081507	0.000217352	0	0	0	0	0	0	0	0	1.81127e-05	0	0.000108676	0.000796957	0.000217352	0	0	3.62253e-05	0	0	3.62253e-05	0	0	0	0	0.000181127	5.4338e-05	0	0	9.05633e-05	0	1.81127e-05	5.4338e-05	1.81127e-05	3.62253e-05	3.62253e-05	0	5.4338e-05	0
20038976	2.67625e-05	8.92085e-06	0.00362186	0.00909034	0.291961	0.00574502	0.000231942	0.000374676	0.000660143	0.387486	0.0900381	0.0670491	1.78417e-05	0.000124892	6.24459e-05	9.81293e-05	8.92085e-06	3.56834e-05	3.56834e-05	2.67625e-05	0.000196259	1.78417e-05	0.000686905	0.00270302	0.000258705	8.02876e-05	6.24459e-05	0.000151654	0.000133813	2.67625e-05	0.000178417	8.02876e-05	0.000142734	0.00010705	0	0.000187338	8.02876e-05	0	8.92085e-06	0.000240863	6.24459e-05	7.13668e-05	9.81293e-05	3.56834e-05	1.78417e-05	8.92085e-06	5.35251e-05	2.67625e-05	8.92085e-06
20039119	0	0	0.0074069	0.00323335	0.0739314	0.195606	4.58631e-05	0.000550358	0.0012383	0.233994	0.133966	0.0286186	0	0	4.58631e-05	2.29316e-05	2.29316e-05	0	0	0	4.58631e-05	2.29316e-05	0.000412768	0.00126124	9.17263e-05	0	2.29316e-05	0.000160521	4.58631e-05	2.29316e-05	0.000137589	9.17263e-05	0.000160521	4.58631e-05	0	6.87947e-05	0	0	4.58631e-05	0.000206384	6.87947e-05	6.87947e-05	6.87947e-05	0	2.29316e-05	0	0	0	0
20039176	0	0	0.000477783	0.00266762	0.111841	0.000955566	3.98153e-05	0.000278707	0.000437968	0.301441	0.0562988	0.445851	0	0	0.000199076	0.000199076	0	3.98153e-05	0	3.98153e-05	0	0	7.96305e-05	0.000437968	0.000358337	0	3.98153e-05	7.96305e-05	0.000159261	3.98153e-05	0.000159261	3.98153e-05	0	0	0	0.000238892	0.000358337	0	0	0.000597229	0	0	0.000477783	0	0	0	0	0	0
20129490	0	0	0	0	5.30073e-05	0	0	0	0	0	0	0	0.987685	0	0.000106015	0	0	0	0.000106015	0	0	0	5.30073e-05	0.000176691	0.000353382	0	0	0	0	0	0	0	0	0	0	0	0	0	0	1.76691e-05	0	0	1.76691e-05	0	1.76691e-05	1.76691e-05	0	0	0
20150415	0	0	5.54593e-05	0	0.000526863	4.15945e-05	1.38648e-05	2.77296e-05	0	0.000152513	0	0	0	0.383958	0.023279	0.230281	0.00454766	0.0106482	0.0324991	0.0349255	0.0784055	0.00409012	0.000249567	0.00180243	0.000720971	0.000485269	0.000443674	0.000762565	0.00174697	0.000388215	0.000360485	0.00855459	0.00130329	0.000499133	0	0.0025234	0.000901213	1.38648e-05	0.000263432	0.0020104	0.000263432	0.000790295	0.000499133	0.000124783	0.000845754	4.15945e-05	0.000526863	0.000235702	0.000124783
20150419	4.06399e-05	4.06399e-05	9.0311e-06	0	0.000189653	2.25777e-05	0	3.16088e-05	0	1.35466e-05	1.35466e-05	1.80622e-05	2.25777e-05	0.00763579	0.467106	0.015958	0.0879042	0.0241537	0.0732783	0.00209521	0.00326474	0.00724294	0.000266417	0.00222617	0.00104309	0.000835377	0.000207715	0.000383822	0.000745066	0.000356728	0.000108373	0.00328732	0.00170236	0.000239324	3.61244e-05	0.000609599	0.00049671	2.70933e-05	4.06399e-05	0.00131402	6.77332e-05	0.000212231	0.000176106	0.000257386	0.00028448	4.51555e-05	0.000329635	0.000207715	4.51555e-05
20150428	0	0	8.58052e-06	1.7161e-05	0.000892374	9.43858e-05	0	6.86442e-05	0	0.000128708	8.58052e-06	4.29026e-05	0	0.1403	0.0303922	0.352599	0.00411865	0.0526758	0.0652549	0.0373253	0.0231846	0.00849472	0.000540573	0.00362098	0.00117553	0.00144153	0.00114979	0.0029946	0.00308041	0.00102108	0.00108115	0.0509426	0.00380117	0.00137288	1.7161e-05	0.00388698	0.0012356	0.000102966	0.000197352	0.00245403	0.00032606	0.000429026	0.000437607	0.000188772	0.000634959	6.86442e-05	0.000454768	0.000223094	8.58052e-05
20150438	3.81548e-05	0	9.53871e-06	0	0.000248006	3.81548e-05	0	9.53871e-06	0	0	1.90774e-05	0	0	0.00320501	0.184746	0.00428288	0.530295	0.0277481	0.01034	0.000429242	0.000610477	0.0179232	0.00021939	0.00111603	0.0005914	0.00221298	0.000104926	0.000333855	0.000391087	0.000801251	0.000124003	0.00152619	0.000486474	0.000124003	2.86161e-05	0.000391087	0.000333855	1.90774e-05	2.86161e-05	0.00237514	5.72322e-05	0.000143081	0.000419703	0.000724942	0.000410164	1.90774e-05	0.000124003	6.6771e-05	1.90774e-05
20150457	0	2.89272e-05	1.44636e-05	0	0.000766572	1.44636e-05	0	0.000390518	0	4.33909e-05	1.44636e-05	0	0	0.0106308	0.0802152	0.0867094	0.0400787	0.445884	0.0208565	0.00335556	0.00269023	0.0701485	0.000896744	0.00248774	0.00130173	0.00498995	0.000853353	0.000896744	0.001591	0.00128726	0.000347127	0.0217388	0.00417999	0.000477299	1.44636e-05	0.00229972	0.000752108	8.67817e-05	0.000188027	0.00271916	0.000115709	0.000578545	0.000491763	0.000115709	0.000506227	7.23181e-05	0.000260345	0.000303736	7.23181e-05
20150466	0	0	2.53017e-05	0	0.000341573	3.79526e-05	0	5.06034e-05	0	3.79526e-05	1.26509e-05	2.53017e-05	6.32543e-05	0.0291476	0.207575	0.0992713	0.0142955	0.01761	0.303507	0.00712244	0.00939959	0.00657845	0.000417478	0.00254282	0.000670496	0.0014675	0.00148015	0.00212534	0.00304886	0.000708448	0.000910862	0.0105382	0.00228981	0.00136629	5.06034e-05	0.0043519	0.000746401	5.06034e-05	0.000164461	0.00301091	0.000101207	0.000303621	0.00059459	0.000278319	0.00059459	0.000101207	0.000556638	0.000341573	2.53017e-05
20150476	0	0	0.00013838	0	0.000691898	0.000103785	0	6.91898e-05	0	0.00013838	3.45949e-05	0	0	0.0850342	0.016398	0.14983	0.0020065	0.00736871	0.0191656	0.199682	0.116758	0.0020411	0.000484329	0.00297516	0.000830277	0.000276759	0.000276759	0.000795683	0.000795683	0.000553518	0.000276759	0.111292	0.00152218	0.000449734	3.45949e-05	0.00128001	0.000795683	3.45949e-05	0.000622708	0.0020065	0.000345949	0.000345949	0.000588113	0.000207569	0.000691898	0.000103785	0.000380544	0.000103785	0.00013838
20150485	1.57729e-05	0	4.73186e-05	0	0.000899054	3.15457e-05	0	7.88644e-05	1.57729e-05	0.00022082	1.57729e-05	0	0	0.0883281	0.0113091	0.0439432	0.00116719	0.00317035	0.0116719	0.0539905	0.345521	0.00135647	0.000347003	0.00268139	0.000977918	0.000599369	0.000205047	0.000283912	0.000457413	0.000252366	0.000268139	0.00856467	0.000567823	0.000189274	0	0.00121451	0.00105678	7.88644e-05	0.000189274	0.0035489	0.000914826	0.000741325	0.000725552	0.000268139	0.000835962	0.00011041	0.000851735	0.000615142	7.88644e-05
20150495	0	0	8.58762e-05	0	0.000400756	2.86254e-05	0	0.000143127	0	0	0	0	0	0.00884525	0.0472605	0.0258774	0.0537585	0.138833	0.0144845	0.00108777	0.00249041	0.0895975	0.000543883	0.00220416	0.00108777	0.0822408	0.00111639	0.00237591	0.00289117	0.00724223	0.000887388	0.0806664	0.0289689	0.00151715	8.58762e-05	0.00294842	0.000830137	0.000229003	8.58762e-05	0.0120227	5.72508e-05	0.000114502	0.000314879	0.000343505	0.000486632	5.72508e-05	0.000343505	8.58762e-05	2.86254e-05
20150601	4.30397e-06	4.30397e-06	0.000598252	0	0.000824211	4.51917e-05	0	5.59516e-05	2.79758e-05	0.000152791	2.79758e-05	1.72159e-05	8.60794e-06	3.65838e-05	0.000120511	0.000114055	4.94957e-05	0.000111903	8.60794e-05	2.36718e-05	7.53195e-05	4.30397e-05	0.477706	0.139154	0.00907923	2.79758e-05	3.22798e-05	6.24076e-05	7.96235e-05	7.10155e-05	2.15199e-05	0.00063914	0.000114055	7.10155e-05	2.15199e-06	0.000146335	0.000286214	1.29119e-05	5.59516e-05	0.000187223	5.81036e-05	0.000101143	0.000167855	0.000144183	0.000213047	0.000137727	9.25354e-05	4.73437e-05	3.01278e-05
20150602	5.79262e-06	1.50608e-05	0.00038463	9.84745e-06	0.000976056	0.000122804	7.5304e-06	3.41764e-05	6.37188e-05	0.000167407	2.54875e-05	1.21645e-05	9.84745e-06	7.70418e-05	0.000283838	0.000216644	7.47248e-05	9.38404e-05	0.000108901	4.57617e-05	9.78953e-05	4.57617e-05	0.0373462	0.675941	0.0408988	6.42981e-05	7.87796e-05	0.000189998	9.21026e-05	5.32921e-05	0.000168565	0.000218961	9.7316e-05	6.89322e-05	6.37188e-06	0.000254296	0.000505696	3.7652e-05	9.67367e-05	0.000232284	3.99691e-05	0.000155242	0.000227071	0.000130913	0.000239235	7.47248e-05	0.000178992	7.58833e-05	4.98165e-05
20150603	6.68697e-06	8.91595e-06	5.79537e-05	2.22899e-06	0.000497064	0.000127052	2.22899e-06	5.34957e-05	2.89768e-05	5.79537e-05	8.91595e-06	1.33739e-05	3.34348e-05	9.36175e-05	0.000512667	0.000280853	9.13885e-05	0.000209525	0.000149342	2.89768e-05	0.000147113	8.91595e-05	0.00932386	0.158013	0.422897	0.000118136	0.000100304	0.000213983	8.91595e-05	9.13885e-05	0.000196151	0.0003076	0.000106991	0.000133739	2.22899e-06	0.000294226	0.00102088	9.36175e-05	8.91595e-05	0.00044134	4.90377e-05	0.000225128	0.000423508	0.000251876	0.000517125	7.80146e-05	0.00046363	0.000207296	6.68697e-05
20150811	0	0	5.27384e-05	0	0.00105477	0.000105477	0	0.000105477	0	0.000184585	2.63692e-05	0	0	0.000975661	0.0047992	0.00443003	0.00675052	0.00970387	0.00271603	0.000210954	0.00105477	0.0766026	0.000421908	0.00305883	0.00166126	0.202621	0.0140812	0.0111278	0.101943	0.118635	0.00295335	0.0616512	0.12238	0.0134483	0.000158215	0.0375234	0.000922923	0.000131846	0.000580123	0.00326978	5.27384e-05	0.000105477	0.000237323	7.91077e-05	0.000290061	7.91077e-05	0.000316431	7.91077e-05	2.63692e-05
20150812	3.09377e-05	0	6.18754e-05	0	0.00117563	0.00040219	0	0.000185626	0	0.000216564	3.09377e-05	0	0	0.000897194	0.00191814	0.00361971	0.000371253	0.00167064	0.00334127	0.000309377	0.00040219	0.00111376	0.000464066	0.00355784	0.00145407	0.0167682	0.208675	0.0236364	0.181604	0.0971135	0.0107663	0.0108901	0.0128701	0.0176036	0.000247502	0.247347	0.00102094	0.00040219	0.000247502	0.00136126	0.000123751	0.000309377	0.000433128	0	0.000247502	3.09377e-05	0.000525941	0.00027844	3.09377e-05
20150818	0	0	7.05658e-05	0	0.00061157	0.000170534	2.35219e-05	0.000176415	1.1761e-05	0.00011761	2.94024e-05	5.88049e-06	0	0.000399873	0.000546885	0.0018994	0.000258741	0.000405753	0.0010232	0.000170534	0.000129371	0.000570407	0.000152893	0.00177003	0.000552766	0.00244628	0.00450445	0.517059	0.00696837	0.0063274	0.0900361	0.00263446	0.00550413	0.164789	0.00305785	0.0807391	0.000541005	2.35219e-05	1.1761e-05	0.00205229	0	8.23268e-05	0.00011761	3.52829e-05	4.70439e-05	2.35219e-05	2.94024e-05	4.11634e-05	2.94024e-05
20150844	2.87902e-05	0	5.75805e-05	1.43951e-05	0.00149709	0.000431854	0	4.31854e-05	1.43951e-05	0.000172741	2.87902e-05	5.75805e-05	0	0.00182818	0.00213048	0.00498071	0.00064778	0.00152588	0.00341164	0.000431854	0.000446249	0.00138193	0.000489434	0.00241838	0.000806127	0.0564145	0.0849312	0.0175908	0.455591	0.034793	0.00607474	0.0153596	0.0740917	0.00922727	8.63707e-05	0.0531036	0.00143951	1.43951e-05	0.000259112	0.00179939	0.000115161	0.000172741	0.000374273	0.000129556	0.000316693	2.87902e-05	0.000244717	0.000158346	5.75805e-05
20150850	2.36939e-05	0	0	0	0.000829286	0.000260633	0	9.47755e-05	0	9.47755e-05	0	0	0	0.000687122	0.00222722	0.00251155	0.00139794	0.00229831	0.00111361	0.00030802	0.000473878	0.00561545	0.000876673	0.00213245	0.00085298	0.10468	0.0746357	0.0254946	0.0559175	0.155147	0.00383841	0.00634996	0.0134107	0.114489	9.47755e-05	0.286506	0.000544959	0.000142163	7.10816e-05	0.00293804	2.36939e-05	7.10816e-05	0.000379102	4.73878e-05	0.000213245	0	0.000142163	0.000165857	2.36939e-05
20150863	0	0	0.000260475	0	0.000674868	0.000213116	9.47183e-05	4.73591e-05	4.73591e-05	0.000118398	5.91989e-05	2.36796e-05	0	0.000307834	0.000378873	0.00162205	0.000165757	0.000414392	0.000580149	8.28785e-05	0.000201276	0.00052095	0.000118398	0.00316122	0.00120766	0.00125502	0.00412024	0.181954	0.0052095	0.00194172	0.350896	0.00213116	0.00190621	0.0142196	0.00841809	0.0329383	0.000426232	3.55194e-05	2.36796e-05	0.0020838	1.18398e-05	0.000201276	0.000118398	0.000165757	0.000236796	0	2.36796e-05	4.73591e-05	2.36796e-05
20150869	1.07064e-05	0	3.21192e-05	0	0.000578146	0.000107064	0	5.3532e-05	0	6.42385e-05	4.28256e-05	3.21192e-05	0	0.00620972	0.00822252	0.0643348	0.00196998	0.0149783	0.00882208	0.0347316	0.00603841	0.0300957	0.00310486	0.00376866	0.00143466	0.0243035	0.00372583	0.00507484	0.011488	0.00288002	0.00189503	0.461618	0.0473009	0.00214128	8.56513e-05	0.0117021	0.0016702	3.21192e-05	0.000203422	0.0020021	0.00011777	0.000182009	0.00041755	0.000224835	0.000396137	4.28256e-05	0.000278367	3.21192e-05	9.63577e-05
20150875	0	0	4.90533e-05	2.45266e-05	0.00228098	0.000245266	0	0	7.35799e-05	0.000392426	0.000122633	0	0	0.00196213	0.00907486	0.0112577	0.00122633	0.00689198	0.00470911	0.000956539	0.000809379	0.0247228	0.00120181	0.00409595	0.00154518	0.113583	0.0107427	0.0250417	0.124105	0.0133915	0.004145	0.105906	0.294442	0.00468459	9.81065e-05	0.0330864	0.00169234	4.90533e-05	0.00022074	0.00228098	0.000441479	0.000269793	0.000539586	7.35799e-05	0.000416953	0.00014716	0.000416953	0.000245266	2.45266e-05
20150882	7.31534e-06	0	8.77841e-05	0	0.000402344	6.58381e-05	0	7.31534e-05	1.46307e-05	0.000117045	2.92614e-05	7.31534e-06	0	0.000307244	0.000416975	0.00106804	0.000146307	0.000336506	0.000731534	0.000131676	8.77841e-05	0.000307244	0.000226776	0.000965625	0.000504759	0.00367962	0.0037674	0.206249	0.00449162	0.0362475	0.00866137	0.00141186	0.00130945	0.412951	0.000526705	0.238553	0.000256037	2.92614e-05	4.38921e-05	0.00119972	5.85227e-05	4.38921e-05	9.50995e-05	7.31534e-06	5.85227e-05	2.1946e-05	8.77841e-05	2.92614e-05	1.46307e-05
20150888	0	0	0	0	0.00028777	0.00028777	0	0	0	0.00028777	0.00028777	0	0	0	0.00057554	0.00028777	0.00057554	0.00028777	0.000863309	0.00028777	0	0.00115108	0	0.00230216	0.00057554	0.00115108	0.00115108	0.141583	0.00143885	0.0028777	0.192806	0.00115108	0.00057554	0.018705	0.413813	0.0244604	0.00115108	0	0.00028777	0.00115108	0	0.00028777	0	0	0	0	0	0	0
20150899	1.88679e-05	0	0.000113208	0	0.000759434	0.000198113	4.71698e-06	0.000193396	3.77358e-05	0.000108491	9.43396e-06	2.83019e-05	4.71698e-06	0.000924528	0.000566038	0.00232075	0.000160377	0.000679245	0.0015566	0.000160377	0.000353774	0.000448113	0.000268868	0.00216038	0.000551887	0.00683962	0.0375236	0.0651509	0.0177311	0.0565094	0.0138255	0.00534434	0.00641038	0.154495	0.000485849	0.525783	0.000792453	3.30189e-05	5.66038e-05	0.000985849	6.13208e-05	0.000117925	0.000462264	3.30189e-05	0.000113208	1.41509e-05	0.000150943	6.60377e-05	3.77358e-05
20151017	1.06672e-05	0	6.40031e-05	0	0.000661365	0.000112005	0	3.20015e-05	1.60008e-05	9.60046e-05	1.06672e-05	3.20015e-05	5.33359e-06	0.000368018	0.000544026	0.000741369	0.000138673	0.000288014	0.000394686	0.000112005	0.000378685	0.000128006	0.000864041	0.00496024	0.00253345	0.00020801	0.000149341	0.000533359	0.000501357	0.000154674	0.000261346	0.000938712	0.000378685	0.000192009	4.80023e-05	0.000880042	0.586135	5.86695e-05	0.0104325	0.00125873	0.000165341	0.000597362	0.000746703	0.00041602	0.000640031	0.000266679	0.000677366	0.000181342	0.000240012
20151018	0	0	9.41797e-05	0	0.000188359	0	0	0	0	0	0	0	9.41797e-05	0	0.000847617	0.000753438	0.000188359	0.000470898	0.000565078	0.000188359	0.000376719	0.00103598	0.000753438	0.00499152	0.00386137	0.000470898	0.00113016	0.000282539	0.000470898	0.000847617	0	0.000659258	0.000282539	0.000470898	0	0.000565078	0.000941797	0.179224	0.000470898	0.00574496	0.000188359	0.000659258	0.000847617	0.00169523	0.0349407	0.000376719	0.000470898	0.000376719	0.000188359
20151019	0	0	2.61917e-05	0	0.000471451	0.000130959	2.61917e-05	2.61917e-05	0	2.61917e-05	0	0	0	0.000340492	0.000261917	0.000654793	0.000130959	0.000209534	0.000392876	0.000523834	0.000288109	0.000130959	0.000550026	0.00416448	0.00107386	0.000497643	5.23834e-05	0.000130959	0.000419068	0.000104767	7.85752e-05	0.000628601	0.000104767	7.85752e-05	0	0.000445259	0.0509167	0.000183342	0.601938	0.00432163	7.85752e-05	0.000261917	0.000523834	0.000235726	0.000576218	5.23834e-05	0.000576218	5.23834e-05	5.23834e-05
20151035	3.13376e-05	2.35032e-05	0.000109682	4.70065e-05	0.000846116	0.000180191	3.13376e-05	0.000133185	4.70065e-05	0.00019586	8.61785e-05	0.000164523	0	0.00112816	0.00206828	0.00209962	0.00154338	0.00133968	0.00198994	0.000587581	0.00190376	0.00227198	0.000791276	0.00300058	0.00152771	0.000642422	0.000329045	0.00242083	0.00102631	0.000705097	0.00126917	0.00130051	0.000517071	0.00123	5.48409e-05	0.00151988	0.00205262	0.000446561	0.00123784	0.299564	0.000383886	0.000477899	0.000908792	0.0010028	0.00473198	0.000109682	0.000767772	0.000587581	0.000289873
20151217	0	0	0	0	0.000849033	9.17873e-05	0	2.29468e-05	0	6.88405e-05	4.58937e-05	0	0	0.000390096	0.000481883	0.00103261	4.58937e-05	0.000183575	0.000252415	0.000206521	0.00114734	4.58937e-05	0.000803139	0.00153744	0.000642511	0	9.17873e-05	4.58937e-05	0.000367149	2.29468e-05	6.88405e-05	0.00043599	0.000298309	0.000183575	0	0.000413043	0.000711352	2.29468e-05	6.88405e-05	0.000849033	0.406641	0.124395	0.00722825	0.000596618	0.00190459	0.000619564	0.0323321	0.00167512	0.00846738
20151219	1.21159e-05	0	2.42319e-05	1.21159e-05	0.00059368	0.000145391	0	4.84637e-05	1.21159e-05	8.48115e-05	1.21159e-05	0	0	0.000751187	0.000617912	0.000448289	0.000145391	0.000363478	0.000242319	0.000193855	0.000642144	7.26956e-05	0.000642144	0.00345304	0.00133275	3.63478e-05	9.69274e-05	0.000145391	0.000218087	6.05796e-05	0.000302898	0.000218087	0.000193855	7.26956e-05	0	0.000399826	0.00119948	8.48115e-05	0.000145391	0.000751187	0.0662499	0.451427	0.0333915	0.00236261	0.00831152	0.00722109	0.134099	0.00508869	0.0744887
20151238	0	8.1694e-06	5.71858e-05	0	0.000285929	0.000147049	8.1694e-06	4.90164e-05	0	4.90164e-05	1.63388e-05	0.000114372	0	0.000351284	0.000351284	0.000392131	0.000310437	0.000318607	0.000400301	9.80328e-05	0.000343115	0.000122541	0.000490164	0.00311254	0.00138063	4.90164e-05	9.80328e-05	0.00027776	0.00027776	0.00013888	9.80328e-05	0.000171557	0.000212404	0.00013888	0	0.000857787	0.00124992	8.1694e-05	0.000106202	0.000939481	0.00261421	0.0233481	0.4381	0.0231112	0.11612	0.0455444	0.0904843	0.0504787	0.00596366
20151247	0	0	8.07689e-05	0	0.000100961	0.000141346	0	2.01922e-05	0	6.05767e-05	4.03845e-05	0	0	0.000121153	0.00090865	0.000383652	0.00151442	0.000302883	0.00036346	0.00018173	0.000323076	0.000161538	0.00147403	0.00405864	0.00248364	6.05767e-05	4.03845e-05	0.000100961	0.000161538	8.07689e-05	0.000282691	0.000444229	0.000161538	4.03845e-05	0	0.000161538	0.00147403	0.000302883	0.000141346	0.00220095	0.000424037	0.00365479	0.0591632	0.369881	0.0512075	0.0441402	0.00819805	0.00367499	0.00274614
20151250	0	0	2.46162e-05	0	0.000418475	2.46162e-05	1.64108e-05	4.92324e-05	3.28216e-05	1.64108e-05	1.64108e-05	8.2054e-06	1.64108e-05	0.000508735	0.000549762	0.000557967	0.0003036	0.000336421	0.000402064	0.000147697	0.000459502	0.000131286	0.00082054	0.00341345	0.00180519	9.02594e-05	4.92324e-05	4.1027e-05	0.000229751	9.84648e-05	9.02594e-05	0.000295394	0.000131286	9.84648e-05	0	0.00019693	0.0010667	0.00294574	0.000254367	0.00495606	0.000656432	0.0051612	0.117756	0.0205955	0.398142	0.003955	0.0138425	0.0631159	0.00144415
20151257	0	0	0	0	0.000231351	5.14112e-05	0	0.000128528	2.57056e-05	2.57056e-05	0	0	0	0.000102822	0.000205645	0.000257056	7.71169e-05	0.000102822	0.000308467	5.14112e-05	7.71169e-05	0	0.00161945	0.00359879	0.00105393	5.14112e-05	2.57056e-05	7.71169e-05	5.14112e-05	0	2.57056e-05	0.000102822	0.000257056	7.71169e-05	0	0.000179939	0.0013881	5.14112e-05	5.14112e-05	0.000514112	0.000848285	0.014498	0.142152	0.0576063	0.0136497	0.465452	0.0939026	0.00490977	0.0197419
20151266	2.52105e-05	0	2.52105e-05	8.4035e-06	0.000319333	0.000100842	0	0.000134456	0	4.20175e-05	8.4035e-06	0	0	0.00033614	0.00067228	0.000428579	0.000126053	0.000176474	0.000361351	0.00016807	0.000487403	0.000100842	0.000327737	0.00254626	0.00180675	0.000126053	0.000126053	2.52105e-05	0.000117649	4.20175e-05	0	0.000260509	0.000126053	3.3614e-05	0	0.000210088	0.00115128	1.6807e-05	0.000151263	0.000890771	0.0110674	0.0917242	0.0931612	0.00339502	0.0144624	0.0306896	0.477075	0.0217315	0.00945394
20151276	0	0	0.000200145	0	0.000525381	0.000100073	0	2.50181e-05	7.50544e-05	7.50544e-05	2.50181e-05	0	0	0.000325236	0.00112582	0.000650472	0.000150109	0.000525381	0.00067549	0.000100073	0.00102574	0.000150109	0.000875635	0.00365265	0.00265192	5.00363e-05	0.000175127	0.000225163	0.000175127	0.000150109	0.000125091	0.000125091	0.000225163	5.00363e-05	0	0.000250181	0.00067549	0.000100073	0.000125091	0.00167622	0.00200145	0.00983213	0.155588	0.00460334	0.197068	0.00465337	0.066173	0.28986	0.00175127
20151285	0	0	4.51386e-05	0	0.000270831	0.000225693	0	9.02772e-05	0	0	4.51386e-05	0	0	0.000361109	0.000677079	0.00063194	4.51386e-05	0.000406247	0.000180554	9.02772e-05	0.00063194	4.51386e-05	0.000361109	0.00446872	0.00148957	4.51386e-05	4.51386e-05	0.000361109	9.02772e-05	9.02772e-05	4.51386e-05	0.000361109	9.02772e-05	0.000270831	0	0.00031597	0.0011736	0.000135416	0.000225693	0.00171527	0.0173332	0.279272	0.0311908	0.00609371	0.00762842	0.0345761	0.0502392	0.00293401	0.061253
20151813	1.99263e-05	0	7.97051e-05	0.000139484	0.0050812	0.000139484	0	0.000199263	7.97051e-05	0.00284946	9.96314e-05	0.000577862	1.99263e-05	0.00221182	0.000836903	0.0031882	0.000199263	0.000478231	0.00153432	0.00221182	0.00261034	0.000298894	0.000338747	0.00187307	0.00085683	9.96314e-05	0.000179336	0.000597788	0.000577862	0.000298894	0.000139484	0.00597788	0.000458304	0.00015941	0	0.000816977	0.000816977	7.97051e-05	0.000219189	0.00103617	0.000278968	0.000338747	0.000298894	0.00015941	0.000298894	0.000298894	0.000538009	0.000259042	5.97788e-05
20151828	0	0	2.60085e-05	0	0.00241879	0.000104034	0	3.90127e-05	2.60085e-05	0.000325106	1.30042e-05	0.000143047	0	0.00801061	0.00412234	0.0143437	0.000468153	0.00161253	0.0046165	0.0320815	0.0321725	0.000806263	0.000468153	0.00210669	0.000923301	0.000325106	0.000325106	0.000533174	0.00136545	0.000234076	0.000247081	0.0699238	0.00102733	0.000208068	0	0.00105334	0.00101433	1.30042e-05	0.000260085	0.00169055	0.000546178	0.000533174	0.000546178	0.000195064	0.000494161	9.10297e-05	0.000598195	0.000442144	0.000130042
20151847	0.00010101	0	0.00031746	4.329e-05	0.00959596	0.00044733	2.886e-05	0.000692641	0.00011544	0.00235209	0.00018759	0.00033189	0	0.00044733	0.000591631	0.000793651	0.0001443	0.00046176	0.00049062	0.0002886	0.000533911	0.00041847	0.0004329	0.00197691	0.000836941	0.00011544	0.00018759	0.000793651	0.000577201	0.00031746	0.00017316	0.00145743	0.000519481	0.00034632	0	0.000707071	0.000793651	2.886e-05	7.21501e-05	0.000836941	0.0002886	0.000562771	0.000721501	0.00017316	0.000533911	8.65801e-05	0.00106782	0.00046176	0.0001443
20151866	1.27192e-05	5.0877e-05	0.000311622	6.99559e-05	0.0050559	0.000298902	7.63155e-05	0.000413376	0.000108114	0.00160263	0.00017171	0.000178069	6.35962e-06	0.00103662	0.000941224	0.0013546	0.000146271	0.000661401	0.000635962	0.000833111	0.00228946	0.000190789	0.000566007	0.00255021	0.00113837	0.000158991	7.63155e-05	0.000375218	0.000368858	8.26751e-05	0.000152631	0.00164078	0.00016535	9.53944e-05	1.90789e-05	0.00050241	0.000712278	6.99559e-05	0.000139912	0.00101118	0.000432454	0.000483331	0.000559647	0.000127192	0.000534208	2.54385e-05	0.000686839	0.000241666	8.90347e-05
20151885	2.4139e-05	0	0.00017702	1.60927e-05	0.00271967	0.0003299	6.43708e-05	0.000337947	0.000152881	0.000756357	8.04635e-05	6.43708e-05	0	0.000691986	0.000547152	0.00107821	0.00024139	0.000313808	0.000635661	0.000563244	0.00318635	0.000112649	0.000949469	0.00520599	0.00159318	0.000144834	0.000209205	0.000249437	0.000289668	8.04635e-05	0.00024139	0.000740264	0.000160927	8.85098e-05	0	0.000708079	0.00134374	4.02317e-05	0.000337947	0.000965562	0.000675893	0.000571291	0.000700032	0.000152881	0.000675893	0.000128742	0.00141616	0.000225298	0.000136788
20151899	0	0	8.34394e-05	2.08598e-05	0.00360875	0.000166879	2.08598e-05	4.17197e-05	4.17197e-05	0.000750954	8.34394e-05	6.25795e-05	0	0.00189825	0.00198169	0.00252404	0.000354617	0.00100127	0.00137675	0.00271178	0.0103465	0.000229458	0.000125159	0.00175223	0.000730094	0.000208598	0.000187739	0.000438057	0.00112643	6.25795e-05	0.000417197	0.00204426	0.000542356	0.000312898	6.25795e-05	0.000938693	0.000625795	0	6.25795e-05	0.00108471	0.000584076	0.000312898	0.000730094	0.000104299	0.000521496	2.08598e-05	0.000458917	0.000146019	0.000104299
20151904	1.25983e-05	2.22893e-05	6.78371e-05	9.69101e-07	0.000460323	0.000137612	9.69101e-06	6.78371e-05	1.74438e-05	5.23315e-05	2.51966e-05	1.74438e-05	0	0.000335309	0.000569831	0.000519438	0.000182191	0.000373104	0.000402177	0.000227739	0.000327556	0.000160871	0.00130829	0.00923263	0.0101339	0.000198666	0.000177346	0.000425435	0.000395393	0.000134705	0.000321742	0.000508778	0.000270379	0.000203511	3.8764e-06	0.000639607	0.00038861	0.00308562	3.29494e-05	0.00107667	0.000202542	0.001035	0.00244117	0.00182869	0.00686705	0.000652205	0.00163294	0.000713258	0.000371166
20151905	0	1.69768e-05	0.000203721	1.13179e-05	0.000282946	0.000611164	5.65893e-06	4.52714e-05	0.00041876	2.26357e-05	2.26357e-05	5.65893e-06	0.000113179	0.00010752	0.000401784	0.000435737	0.000616823	0.000254652	0.000265969	0.000181086	0.000294264	0.000124496	0.00140341	0.0103445	0.00877699	0.000135814	0.000113179	0.000203721	0.000232016	5.09303e-05	0.000198062	0.000260311	0.000294264	7.9225e-05	0	0.000299923	0.00015845	0.000243334	2.82946e-05	0.000939382	0.000401784	0.00227489	0.00932591	0.033846	0.0510152	0.00216737	0.00514396	0.00214473	0.00102992
20151906	1.18219e-05	0	0.00012413	1.18219e-05	0.000981215	0.000212794	3.54656e-05	0.000153684	3.54656e-05	0.000135951	6.50203e-05	6.50203e-05	5.91093e-06	0.000797976	0.00263037	0.00247077	0.000325101	0.000975304	0.00139498	0.000579272	0.000786154	0.00044332	0.00180283	0.0100368	0.00602915	0.000514251	0.000549717	0.00148956	0.00117036	0.000407854	0.000957571	0.00169053	0.000998948	0.00103441	5.91093e-06	0.00201563	0.00155458	0.01447	0.000230526	0.00353474	0.000159595	0.00109352	0.00195652	0.000815709	0.00688033	0.000597004	0.00144227	0.000638381	0.000401944
20152036	5.4585e-06	1.63755e-05	1.50109e-05	1.36463e-06	0.000156932	3.2751e-05	2.72925e-06	4.09388e-05	5.4585e-06	0.000186954	1.50109e-05	5.4585e-06	8.18775e-06	0.00010917	0.000678219	0.000244268	0.000614081	0.00030977	0.00016239	6.82313e-05	0.000137827	0.00071097	0.00142194	0.00353847	0.000806493	0.000169214	4.3668e-05	0.000115993	9.14299e-05	0.000133733	7.09605e-05	0.000289301	0.000113264	6.68666e-05	6.82313e-06	0.000100982	0.000417575	7.6419e-05	3.82095e-05	0.000731439	6.95959e-05	0.000110535	0.000177401	7.77836e-05	0.00087336	4.91265e-05	0.000343886	0.000155567	2.04694e-05
20152037	6.15703e-06	3.07851e-05	0	0	8.00414e-05	2.46281e-05	0	1.23141e-05	0	1.23141e-05	6.15703e-06	0	6.15703e-06	9.23554e-05	0.000597232	0.000104669	0.000203182	0.000221653	8.61984e-05	3.69422e-05	5.54133e-05	0.000209339	0.000381736	0.00195178	0.000572604	7.38843e-05	3.07851e-05	4.30992e-05	7.38843e-05	3.69422e-05	2.46281e-05	6.77273e-05	1.84711e-05	4.92562e-05	0	6.15703e-05	0.000160083	8.61984e-05	2.46281e-05	0.000277066	3.07851e-05	3.69422e-05	4.92562e-05	6.77273e-05	9.23554e-05	0	4.92562e-05	6.77273e-05	3.07851e-05
20152038	8.72226e-06	0.000201801	8.72226e-06	7.92932e-07	0.000101495	3.80608e-05	4.36113e-06	1.50657e-05	3.96466e-06	1.03081e-05	6.73993e-06	2.3788e-06	1.98233e-06	5.19371e-05	0.000621659	8.8412e-05	0.000128059	0.000144314	7.69144e-05	1.7048e-05	6.22452e-05	0.000171273	0.000239069	0.00135948	0.000468227	9.55484e-05	1.58586e-05	5.82805e-05	5.11441e-05	4.63865e-05	3.44926e-05	0.000105064	6.10558e-05	3.60784e-05	7.92932e-07	6.58134e-05	0.000143917	1.22905e-05	2.10127e-05	0.000239466	2.06162e-05	5.59017e-05	4.91618e-05	3.01314e-05	9.03943e-05	2.14092e-05	5.273e-05	2.85456e-05	1.11011e-05
20152039	1.78826e-05	0.000100046	1.15995e-05	9.66627e-07	7.63635e-05	3.62485e-05	9.66627e-07	9.18295e-06	3.86651e-06	1.59493e-05	9.18295e-06	2.41657e-06	3.86651e-06	2.36824e-05	0.00102752	9.76293e-05	0.000426766	0.000151277	8.69964e-05	1.40161e-05	4.88146e-05	0.000426766	0.000245523	0.00156497	0.000374568	0.000118895	1.83659e-05	8.65131e-05	4.10816e-05	9.66627e-05	3.52819e-05	0.000204442	5.7031e-05	4.34982e-05	1.15995e-05	7.87801e-05	0.000118412	1.40161e-05	1.88492e-05	0.000276455	1.93325e-05	3.18987e-05	5.46144e-05	3.09321e-05	0.000287088	1.01496e-05	6.52473e-05	2.94821e-05	7.2497e-06
20152812	6.37016e-06	6.37016e-06	1.27403e-05	0	0.000222955	5.09613e-05	1.91105e-05	3.18508e-05	1.27403e-05	0	6.37016e-06	6.37016e-06	6.37016e-06	0.000637016	0.000337618	0.000293027	0.000108293	0.000222955	0.000235696	8.91822e-05	5.73314e-05	0.000121033	0.00082812	0.00481584	0.00148425	9.55524e-05	7.00717e-05	3.82209e-05	0.000127403	5.09613e-05	6.37016e-05	0.000152884	6.37016e-05	5.09613e-05	6.37016e-06	0.000191105	0.000433171	3.18508e-05	5.09613e-05	0.000656126	1.27403e-05	0.000522353	0.000191105	0.000108293	0.000171994	0.000146514	0.000184735	0.000108293	0.000178364
20152823	1.49514e-05	9.51454e-06	3.26213e-05	2.71844e-06	0.000447183	7.06794e-05	5.43688e-06	5.02911e-05	3.12621e-05	5.5728e-05	2.4466e-05	9.51454e-06	6.7961e-06	0.000247378	0.00064427	0.000517863	0.000273203	0.000248737	0.000274562	0.000144077	0.000284077	0.000217475	0.00150466	0.00879687	0.00267223	0.000182135	0.000160388	0.000163106	0.000251456	0.000120971	7.33979e-05	0.000312621	0.000169903	8.29124e-05	2.71844e-06	0.000403688	0.00104388	6.7961e-05	0.000149514	0.000699998	0.000118252	0.000297669	0.0003833	0.000126407	0.000390096	9.51454e-05	0.000339805	8.97085e-05	7.61163e-05
20152824	2.75919e-06	8.96738e-06	1.93144e-05	4.13879e-06	0.00027385	5.38043e-05	9.65718e-06	2.41429e-05	1.7245e-05	3.51797e-05	1.31062e-05	5.51839e-06	2.55225e-05	0.000115196	0.000621508	0.000275919	0.000255225	0.000200042	0.000200731	6.13921e-05	0.00013589	0.000140719	0.000870526	0.00483963	0.00160102	0.000109678	4.82859e-05	0.000106919	0.000128992	6.00125e-05	6.55308e-05	0.00023798	9.65718e-05	6.13921e-05	3.44899e-06	0.000199352	0.000602884	4.06981e-05	0.00013727	0.000401463	5.65635e-05	0.00017107	0.000186935	8.48452e-05	0.000221425	3.79389e-05	0.000209009	7.58778e-05	3.03511e-05
20152827	3.15703e-06	1.99945e-05	1.57852e-05	9.47109e-06	0.00023783	2.84133e-05	2.10469e-06	2.31516e-05	1.36805e-05	2.52562e-05	1.05234e-05	6.31406e-06	2.20992e-05	0.00010313	0.000498811	0.000198893	0.000244144	0.000232568	0.000178898	4.84078e-05	5.99836e-05	0.000169427	0.000647191	0.00308337	0.000966051	0.000108391	3.0518e-05	0.000107339	0.000102077	5.05125e-05	2.94656e-05	0.000137857	0.000207312	3.0518e-05	2.10469e-06	0.000161009	0.00033675	2.10469e-05	6.52453e-05	0.000264138	2.73609e-05	9.57633e-05	0.000158904	4.52508e-05	0.000190474	3.78844e-05	9.26062e-05	6.735e-05	3.0518e-05
20152828	1.10747e-05	1.27785e-05	2.12975e-05	4.2595e-06	0.000328833	5.53735e-05	0	3.91874e-05	1.19266e-05	3.49279e-05	1.7038e-05	5.1114e-06	8.519e-06	0.00011671	0.000834862	0.000288794	0.000322018	0.000179751	0.000167824	8.43381e-05	0.000218938	0.00025131	0.000844233	0.00456959	0.00159476	8.60419e-05	7.24115e-05	0.000110747	0.000179751	5.36697e-05	5.70773e-05	0.000239384	0.000111599	6.13368e-05	8.519e-07	0.000230865	0.000943053	4.85583e-05	8.60419e-05	0.000757339	0.000124377	0.000208715	0.000242791	0.000133748	0.000341612	4.68545e-05	0.000333093	9.88204e-05	5.02621e-05
20152829	1.22631e-05	9.81047e-06	2.20736e-05	3.67893e-06	0.000250167	3.92419e-05	1.5942e-05	5.1505e-05	9.81047e-06	2.45262e-05	1.83946e-05	6.13155e-06	3.06577e-05	0.000301672	0.000846153	0.000337235	0.000359309	0.000244036	0.000230546	0.000190078	0.000213378	0.000361761	0.000815496	0.0041486	0.00130357	0.000148383	6.86733e-05	0.000128762	0.000161873	9.07469e-05	0.000170457	0.000241583	0.000110368	6.25418e-05	3.67893e-06	0.000226867	0.00050156	6.25418e-05	0.000147157	0.00192163	5.64102e-05	0.000208473	0.00033233	0.000123857	0.000340914	5.76365e-05	0.000320067	9.19732e-05	5.1505e-05
20152836	0	7.67538e-06	2.55846e-05	1.02338e-05	0.000376094	3.58185e-05	0	1.02338e-05	1.79092e-05	0.000158625	2.55846e-06	2.55846e-06	1.53508e-05	9.978e-05	0.000483549	0.000227703	0.000358185	0.000153508	0.000120248	6.14031e-05	0.000220028	0.000322366	0.00108479	0.00518856	0.00159136	0.000140715	8.18707e-05	0.000171417	0.000168858	6.90784e-05	6.90784e-05	0.000250729	0.000191885	5.62861e-05	2.55846e-06	0.000307015	0.000857084	3.83769e-05	3.58185e-05	0.00036586	0.000104897	0.000324925	0.000281431	8.69877e-05	0.000307015	0.000102338	0.000491224	0.000102338	9.21046e-05
20153313	0	0	3.41076e-05	0	0.000102323	3.41076e-05	0	3.41076e-05	0	6.82152e-05	0	0	0	0	6.82152e-05	0	0	0	0	0	0	0	0.000511614	0.00187592	0.000545721	0	0	0	0	0	0	0	0	0	0	0	3.41076e-05	0	0	0.000102323	0	0	0	0	0	0	0	0	0
20153319	0	0	0	0	0.000162206	5.40687e-05	0	0.000108137	0	0	0	0	0	0.000108137	0.000108137	0.000270343	2.70343e-05	0.000108137	0.000108137	2.70343e-05	5.40687e-05	0.000135172	0.00391998	0.010246	0.00792106	0.000108137	0	0.000108137	0.000216275	0.000108137	5.40687e-05	0.000432549	5.40687e-05	5.40687e-05	0	0.000432549	0.00081103	0	2.70343e-05	0.000162206	0.000135172	0.000135172	8.1103e-05	2.70343e-05	8.1103e-05	2.70343e-05	0.000243309	8.1103e-05	2.70343e-05
20153323	0	0	0	0	0.000298849	9.96165e-05	0	4.98082e-05	0	4.98082e-05	0	0	4.98082e-05	4.98082e-05	0.000174329	7.47124e-05	2.49041e-05	4.98082e-05	4.98082e-05	2.49041e-05	0	0	0.00151915	0.0048563	0.00276436	0	0	0	0	0	0	7.47124e-05	0	0	0	0	0.000298849	4.98082e-05	0	0.000224137	0	9.96165e-05	7.47124e-05	2.49041e-05	0	0	2.49041e-05	0	2.49041e-05
20153328	0	0	0	0	0.000120784	3.45098e-05	0	1.72549e-05	2.58824e-05	8.62746e-06	5.17647e-05	0	0	8.62746e-06	0.000224314	3.45098e-05	1.72549e-05	2.58824e-05	4.31373e-05	0	7.76471e-05	6.90197e-05	0.00142353	0.00467608	0.00233804	4.31373e-05	1.72549e-05	2.58824e-05	6.90197e-05	2.58824e-05	8.62746e-06	4.31373e-05	8.62746e-06	1.72549e-05	0	2.58824e-05	0.000483138	8.62746e-06	8.62746e-06	7.76471e-05	0	0.000172549	6.03922e-05	8.62746e-05	9.4902e-05	2.58824e-05	0.000129412	5.17647e-05	0.000103529
20153338	0	0	5.84025e-05	6.48917e-06	0.000584025	4.54242e-05	1.29783e-05	3.8935e-05	0	1.29783e-05	1.94675e-05	6.48917e-06	0	7.787e-05	0.000110316	7.787e-05	7.787e-05	0.000272545	0.000123294	3.24458e-05	3.24458e-05	5.84025e-05	0.00240748	0.00568451	0.00449699	1.29783e-05	1.94675e-05	5.19133e-05	7.787e-05	6.48917e-06	2.59567e-05	6.48917e-05	3.24458e-05	2.59567e-05	6.48917e-06	6.48917e-05	0.000402328	6.48917e-06	4.54242e-05	0.000162229	1.29783e-05	7.13808e-05	0.000201164	6.48917e-05	0.000110316	6.48917e-05	5.19133e-05	5.84025e-05	3.24458e-05
20153352	0	0	0	0	8.37413e-05	7.61284e-06	0	7.61284e-06	0	6.85156e-05	0	0	0	2.28385e-05	2.28385e-05	5.32899e-05	0	4.5677e-05	1.52257e-05	0	2.28385e-05	7.61284e-06	0.000928767	0.0024894	0.00139315	0	1.52257e-05	7.61284e-06	2.28385e-05	7.61284e-06	0	2.28385e-05	0.000137031	1.52257e-05	0	7.61284e-06	0.000137031	0	0	9.89669e-05	0	3.80642e-05	5.32899e-05	7.61284e-06	3.80642e-05	0	3.04514e-05	7.61284e-06	3.04514e-05
20153355	0	0	0	0	0.000216806	3.09722e-05	3.09722e-05	0.000371667	0	3.09722e-05	0	3.09722e-05	0	0	0	0	0	0	0	0	0	3.09722e-05	0.00126986	0.00309722	0.00145569	0	9.29167e-05	3.09722e-05	3.09722e-05	3.09722e-05	3.09722e-05	3.09722e-05	3.09722e-05	0	0	0.000154861	0.000185833	0	0	0.000123889	3.09722e-05	6.19444e-05	9.29167e-05	0	0	0	0	0	0.000123889
20153357	0	0	0	0	0.000129786	0	0	1.29786e-05	0	2.59572e-05	0	0	0	2.59572e-05	2.59572e-05	2.59572e-05	1.29786e-05	3.89358e-05	6.48929e-05	2.59572e-05	0	1.29786e-05	0.00114212	0.00382868	0.00266061	1.29786e-05	1.29786e-05	1.29786e-05	1.29786e-05	1.29786e-05	1.29786e-05	0.000194679	1.29786e-05	1.29786e-05	1.29786e-05	5.19143e-05	0.000415315	1.29786e-05	6.48929e-05	6.48929e-05	0	5.19143e-05	0	1.29786e-05	0	1.29786e-05	0	1.29786e-05	9.08501e-05
20153361	5.62911e-06	5.62911e-06	5.62911e-06	0	0.000591056	0.000106953	5.62911e-06	0.000112582	1.12582e-05	6.19202e-05	2.25164e-05	0	5.62911e-06	3.94038e-05	0.000225164	0.000163244	4.50329e-05	0.000709268	0.000118211	1.12582e-05	5.0662e-05	9.56949e-05	0.00217284	0.00887711	0.00382779	2.25164e-05	6.19202e-05	6.19202e-05	0.000101324	6.19202e-05	6.19202e-05	8.44366e-05	3.37747e-05	0.000174502	0	0.000146357	0.000410925	2.81455e-05	9.00657e-05	0.000236423	2.81455e-05	9.56949e-05	0.000151986	5.0662e-05	0.000208277	0.000106953	0.000433441	6.75493e-05	3.37747e-05
20153366	0	0	0	0	4.09433e-05	4.09433e-05	0	0	0	0	0	0	0.000286603	4.09433e-05	0.00024566	0.000204717	0	0.00012283	4.09433e-05	0	4.09433e-05	4.09433e-05	0.00171962	0.00700131	0.00605961	4.09433e-05	0	0	4.09433e-05	0	0	8.18867e-05	4.09433e-05	0	0	0.00012283	0.00024566	4.09433e-05	4.09433e-05	8.18867e-05	0	8.18867e-05	0.000163773	8.18867e-05	0.00024566	0	0.000163773	8.18867e-05	0
20153371	0	0	2.32932e-05	0	0.000279518	0	0	6.98796e-05	4.65864e-05	0	0	0	0	2.32932e-05	4.65864e-05	2.32932e-05	2.32932e-05	4.65864e-05	2.32932e-05	6.98796e-05	4.65864e-05	0	0.00286506	0.0081992	0.00675503	2.32932e-05	0	2.32932e-05	2.32932e-05	0	6.98796e-05	0.000116466	0	2.32932e-05	0	6.98796e-05	0.000349398	0	2.32932e-05	0.000186346	6.98796e-05	6.98796e-05	0.000186346	4.65864e-05	6.98796e-05	2.32932e-05	4.65864e-05	9.31728e-05	2.32932e-05
20153376	8.7149e-06	0	1.74298e-05	0	0.000322451	7.84341e-05	8.7149e-06	1.74298e-05	8.7149e-06	2.61447e-05	2.61447e-05	0	8.7149e-06	9.58639e-05	0.000113294	0.000156868	5.22894e-05	8.7149e-05	0.000113294	3.48596e-05	7.84341e-05	1.74298e-05	0.00238788	0.00699807	0.00558625	6.97192e-05	9.58639e-05	0.000104579	6.10043e-05	6.10043e-05	2.61447e-05	0.000148153	9.58639e-05	4.35745e-05	0	0.000174298	0.000653618	0	2.61447e-05	0.000217873	3.48596e-05	0.000200443	0.000339881	6.97192e-05	6.97192e-05	0.000113294	0.000339881	7.84341e-05	6.10043e-05
20153385	0	0	2.97451e-05	0	5.94902e-05	0	0	4.46176e-05	1.48725e-05	2.97451e-05	1.48725e-05	0	0	2.97451e-05	5.94902e-05	2.97451e-05	0.000104108	0.000104108	2.97451e-05	4.46176e-05	1.48725e-05	1.48725e-05	0.00288527	0.00907225	0.00388173	2.97451e-05	0	4.46176e-05	2.97451e-05	1.48725e-05	0	0.00011898	4.46176e-05	4.46176e-05	0	5.94902e-05	0.000535412	1.48725e-05	4.46176e-05	5.94902e-05	2.97451e-05	0.000223088	4.46176e-05	7.43627e-05	0.000104108	1.48725e-05	0.000342068	4.46176e-05	1.48725e-05
20153390	0	0	0	0	0.00012634	2.10566e-05	0	2.10566e-05	0	0	0	0	0	2.10566e-05	2.10566e-05	0	2.10566e-05	0.00018951	0	2.10566e-05	8.42265e-05	0.00018951	0.00210566	0.00600114	0.00429555	2.10566e-05	0	6.31699e-05	2.10566e-05	2.10566e-05	4.21132e-05	0.000105283	2.10566e-05	6.31699e-05	0	0	0.000442189	2.10566e-05	6.31699e-05	0.00012634	6.31699e-05	0.000147396	0.000147396	4.21132e-05	0.000315849	2.10566e-05	2.10566e-05	0.000147396	6.31699e-05
20153511	2.29717e-05	7.46582e-05	5.74293e-06	5.74293e-06	0.000241203	7.46582e-05	8.6144e-06	4.59435e-05	5.74293e-06	3.73291e-05	1.72288e-05	8.6144e-06	0.000160802	8.32726e-05	0.000241203	0.000281404	7.17867e-05	9.1887e-05	8.90155e-05	3.73291e-05	9.1887e-05	7.46582e-05	0.000617365	0.0030897	0.00105957	2.29717e-05	5.74293e-05	6.31723e-05	6.03008e-05	3.15861e-05	3.44576e-05	0.000103373	9.76299e-05	3.73291e-05	5.74293e-06	7.46582e-05	0.000255561	1.72288e-05	4.3072e-05	0.000249818	4.88149e-05	0.000114859	0.000157931	5.16864e-05	0.000134959	5.16864e-05	0.000106244	2.87147e-05	2.01003e-05
20153524	8.96893e-06	0	3.28861e-05	2.98964e-06	0.000822152	6.27825e-05	0	3.28861e-05	5.97929e-06	2.09275e-05	8.96893e-06	2.39172e-05	5.97929e-06	0.000227213	0.00050525	0.000158451	0.000200306	0.000116596	0.000113606	3.58757e-05	8.07204e-05	0.00016443	0.000687618	0.00338428	0.00116596	0.000104638	6.27825e-05	0.000206285	0.000182368	8.96893e-05	6.87618e-05	0.000131544	0.000116596	0.000119586	0	0.00058896	0.000227213	4.1855e-05	4.48447e-05	0.000245151	2.69068e-05	5.68032e-05	0.000266078	2.98964e-05	0.000137524	4.1855e-05	0.000125565	5.68032e-05	8.96893e-06
20153525	6.03273e-06	2.29244e-05	1.80982e-05	3.61964e-06	0.000351105	6.3947e-05	1.20655e-06	4.22291e-05	1.56851e-05	6.51535e-05	2.89571e-05	6.03273e-06	4.82618e-06	0.000138753	0.000590001	0.000190634	0.000205113	0.000139959	0.00013272	4.22291e-05	5.3088e-05	0.000133927	0.000694971	0.00386336	0.00127653	6.636e-05	3.61964e-05	6.15339e-05	9.89368e-05	2.41309e-05	5.55011e-05	0.000153231	4.58488e-05	3.25767e-05	0	0.000188221	0.000360757	3.25767e-05	4.82618e-05	0.000353518	2.05113e-05	8.56648e-05	0.000156851	4.34357e-05	0.000149612	2.53375e-05	0.000114622	4.58488e-05	2.53375e-05
20153526	2.61233e-06	1.24086e-05	2.93887e-05	2.48171e-05	0.000261886	4.96342e-05	4.57157e-06	5.74712e-05	8.22883e-05	9.60031e-05	0.000105799	3.91849e-06	7.83699e-06	3.91849e-05	0.000409482	6.72675e-05	0.000129963	8.29414e-05	7.1186e-05	3.59195e-05	4.63688e-05	7.31452e-05	0.0012709	0.00355669	0.000774555	7.83699e-05	1.5674e-05	5.09404e-05	8.35945e-05	1.89394e-05	5.02873e-05	6.53082e-05	6.3349e-05	2.61233e-05	6.53082e-07	0.000253396	0.000163924	1.82863e-05	3.46134e-05	0.000261886	2.02455e-05	9.01253e-05	0.000102534	2.93887e-05	0.000106452	1.43678e-05	0.000106452	5.42058e-05	2.15517e-05
20153710	1.98394e-05	0	1.98394e-05	0	0.000171942	0.000112423	0	1.98394e-05	6.61314e-06	1.98394e-05	1.98394e-05	6.61314e-06	6.61314e-06	9.2584e-05	0.000185168	0.000376949	7.27446e-05	0.000211621	0.000171942	0.000152102	0.000271139	0.00010581	0.0038224	0.0117449	0.0198659	4.6292e-05	7.27446e-05	0.000185168	0.000138876	0.000251299	7.93577e-05	0.000185168	0.000205007	9.2584e-05	0	0.000277752	0.00023146	0.00012565	1.32263e-05	0.000489373	0.000238073	0.000780351	0.00128295	0.00626265	0.00209637	0.000416628	0.000892774	0.00056873	0.000324044
20153711	0	0	0.000124471	0	0.000248942	0	0	0	0	0	0	0	0	0	0.000124471	4.14903e-05	4.14903e-05	0	4.14903e-05	4.14903e-05	0	0	0.0034437	0.00551821	0.00290432	4.14903e-05	0	0	8.29807e-05	0.000124471	0	0.000124471	4.14903e-05	0.000165961	0	0.000331923	0.000290432	0	0	0.000373413	4.14903e-05	0	8.29807e-05	0.000290432	8.29807e-05	0	4.14903e-05	0	4.14903e-05
20153717	0	0	2.85006e-05	0	0.000423437	3.66436e-05	8.14302e-06	3.25721e-05	8.14302e-06	3.66436e-05	1.22145e-05	0	4.07151e-06	0.000158789	0.000138431	0.00021579	3.66436e-05	9.36448e-05	6.10727e-05	3.66436e-05	0.000154717	6.10727e-05	0.260508	0.0558896	0.00958841	2.85006e-05	2.03576e-05	0.000101788	0.000105859	6.10727e-05	6.51442e-05	0.000171004	8.95733e-05	4.47866e-05	0	0.000175075	0.000724729	1.6286e-05	6.92157e-05	0.000236148	9.36448e-05	0.000240219	0.000195433	0.000166932	0.000199504	7.32872e-05	0.000280934	0.00013436	7.73587e-05
20153723	3.74613e-06	3.74613e-06	7.49226e-06	0	0.000134861	1.12384e-05	3.74613e-06	3.37152e-05	3.74613e-06	1.12384e-05	3.74613e-06	7.49226e-06	0	7.86688e-05	8.24149e-05	0.000221022	4.12075e-05	0.000123622	0.000112384	1.87307e-05	0.000153591	4.12075e-05	0.0415259	0.0137221	0.0056679	1.87307e-05	3.74613e-05	7.86688e-05	5.6192e-05	0.000146099	2.62229e-05	7.49226e-05	3.74613e-05	0.000138607	0	0.000176068	0.000554428	6.36842e-05	3.37152e-05	0.000479505	5.99381e-05	0.00021353	0.000565666	0.00398214	0.000749226	0.000221022	0.000340898	0.000161084	0.000202291
20153729	0	0	1.67266e-05	8.3633e-06	0.000284352	8.3633e-06	0	0	0	2.50899e-05	1.67266e-05	1.67266e-05	0	5.01798e-05	0.000117086	0.000108723	9.19963e-05	0.000175629	0.00010036	1.67266e-05	6.69064e-05	2.50899e-05	0.00486744	0.00696663	0.00492598	1.67266e-05	0	4.18165e-05	0.000267626	8.3633e-06	1.67266e-05	9.19963e-05	1.67266e-05	8.3633e-06	0	0.00012545	0.000443255	8.3633e-06	5.85431e-05	0.000150539	8.3633e-06	0.000108723	5.01798e-05	4.18165e-05	9.19963e-05	3.34532e-05	0.000150539	6.69064e-05	0
20153735	2.02498e-06	0	2.83497e-05	2.02498e-06	0.000546744	4.25245e-05	0	3.23996e-05	1.21499e-05	6.27743e-05	2.22747e-05	8.0999e-06	1.61998e-05	5.66993e-05	0.000208573	7.89741e-05	0.000184273	0.000111374	5.87243e-05	3.03746e-05	4.25245e-05	2.42997e-05	0.0311016	0.0122592	0.00456025	4.45495e-05	4.85994e-05	5.87243e-05	4.25245e-05	1.41748e-05	6.68242e-05	6.47992e-05	4.04995e-05	2.42997e-05	2.02498e-06	0.000121499	0.000789741	1.01249e-05	0.000105299	0.000161998	6.07493e-05	0.000153898	0.000139723	0.000113399	7.28991e-05	1.01249e-05	0.000202498	3.44246e-05	8.0999e-06
20153741	0	0	0	0	0.000450944	6.44205e-05	0	0	0	2.14735e-05	2.14735e-05	0	0	0	8.5894e-05	8.5894e-05	6.44205e-05	0.000257682	0.000107368	0	0	0	0.00261977	0.00989929	0.00388671	6.44205e-05	4.2947e-05	0	6.44205e-05	2.14735e-05	2.14735e-05	8.5894e-05	2.14735e-05	4.2947e-05	0	6.44205e-05	0.000322103	0	4.2947e-05	6.44205e-05	0	6.44205e-05	0.000214735	2.14735e-05	8.5894e-05	6.44205e-05	0.000107368	0	0
20153747	0	0	0	0	2.62034e-05	2.62034e-05	0	0	0	2.62034e-05	0	0	0	7.86102e-05	5.24068e-05	0.000131017	5.24068e-05	7.86102e-05	5.24068e-05	0	0	0	0.0101407	0.0077562	0.00398292	0	0	2.62034e-05	0	0	2.62034e-05	2.62034e-05	2.62034e-05	2.62034e-05	0	2.62034e-05	0.000393051	2.62034e-05	2.62034e-05	0.000183424	2.62034e-05	7.86102e-05	7.86102e-05	0.000235831	0.000314441	0	0.000131017	0	7.86102e-05
20153753	0	0	0	0	6.79871e-05	0	0	0	0	4.53248e-05	0	0	0	6.79871e-05	0.000113312	0.000181299	4.53248e-05	0.000135974	0.000135974	2.26624e-05	0	0.000135974	0.00251552	0.00534832	0.00373929	9.06495e-05	2.26624e-05	4.53248e-05	6.79871e-05	0.000113312	2.26624e-05	9.06495e-05	0	4.53248e-05	0	2.26624e-05	0.000611884	0	0.000158637	6.79871e-05	0	2.26624e-05	6.79871e-05	2.26624e-05	0.000249286	0	4.53248e-05	6.79871e-05	4.53248e-05
20153759	2.85144e-06	1.42572e-06	0.00027659	0	0.000191047	2.28116e-05	0	0.000135444	2.85144e-06	1.71087e-05	1.56829e-05	2.85144e-06	8.55433e-06	5.41774e-05	0.000102652	7.6989e-05	4.13459e-05	7.55633e-05	9.26719e-05	2.13858e-05	5.41774e-05	4.41974e-05	0.0148831	0.00963075	0.00322071	3.13659e-05	2.70887e-05	6.55832e-05	4.70488e-05	1.99601e-05	4.56231e-05	6.1306e-05	5.41774e-05	1.85344e-05	4.27717e-06	0.000139721	0.000287996	2.70887e-05	1.85344e-05	0.000143998	2.70887e-05	8.98205e-05	0.000179641	5.1326e-05	6.41575e-05	5.1326e-05	7.41375e-05	4.70488e-05	2.42373e-05
20153765	0	0	3.79061e-05	0	0.000208483	4.73826e-05	0	2.84296e-05	9.47652e-06	4.73826e-05	3.79061e-05	0	0	9.47652e-06	0.000142148	6.63356e-05	4.73826e-05	4.73826e-05	4.73826e-05	3.79061e-05	7.58121e-05	3.79061e-05	0.00656723	0.00595125	0.00230279	0	9.47652e-06	2.84296e-05	9.47652e-06	2.84296e-05	0	2.84296e-05	9.47652e-06	2.84296e-05	9.47652e-06	0.00018953	0.000350631	9.47652e-06	1.8953e-05	0.000236913	1.8953e-05	7.58121e-05	0.000151624	0.000123195	6.63356e-05	0	0.000123195	9.47652e-06	9.47652e-06
20153771	0	0	0.000358518	0	0.00259236	2.75783e-05	0	4.59639e-05	0	0.000183856	2.75783e-05	0	0	4.59639e-05	0.000174663	0.000137892	9.19278e-06	0.000119506	9.19278e-05	9.19278e-06	4.59639e-05	3.67711e-05	0.0135502	0.0126401	0.00365873	9.19278e-06	1.83856e-05	6.43495e-05	2.75783e-05	9.19278e-06	3.67711e-05	7.35423e-05	9.19278e-06	2.75783e-05	0	0.000119506	0.00039529	1.83856e-05	9.19278e-06	0.000220627	6.43495e-05	0.000101121	0.000101121	1.83856e-05	0.000211434	3.67711e-05	0.000110313	0.000147085	3.67711e-05
20153777	0	0	0	0	0	0	0	0	0	0	0	0	0	0	4.30645e-05	4.30645e-05	0	0.000129193	0.000559838	4.30645e-05	0.000172258	8.61289e-05	0.00267	0.00667499	0.00370354	4.30645e-05	0.000301451	0	4.30645e-05	0.000215322	0	8.61289e-05	4.30645e-05	4.30645e-05	0	0.000258387	0.000258387	0	8.61289e-05	0.000129193	4.30645e-05	0.000172258	0.000129193	8.61289e-05	0	4.30645e-05	0	0	4.30645e-05
20153789	0	0	0	0	0.000143373	0	0	0	0	0	0	0	0	7.16863e-05	0.000334536	0.000310641	2.38954e-05	0.000238954	0.000143373	0.000143373	0.000119477	2.38954e-05	0.0208846	0.0854501	0.141437	4.77909e-05	9.55817e-05	7.16863e-05	4.77909e-05	4.77909e-05	0.000143373	0.000143373	0.000167268	0.000286745	0	0.000238954	0.000597386	0.000191163	4.77909e-05	0.000454013	0.000191163	0.00026285	0.000740758	0.000955817	0.00124256	0.000143373	0.000406222	0.000167268	0.000238954
20153795	0	0	0	0	0.000254913	0	0	1.15869e-05	1.15869e-05	0	0	0	0	3.47608e-05	6.95217e-05	0.000139043	4.63478e-05	0.000104283	0.000104283	2.31739e-05	3.47608e-05	9.26956e-05	0.0128152	0.0092348	0.0039048	1.15869e-05	3.47608e-05	2.31739e-05	5.79347e-05	1.15869e-05	1.15869e-05	4.63478e-05	2.31739e-05	5.79347e-05	0	0.000231739	0.000648869	2.31739e-05	3.47608e-05	0.000220152	2.31739e-05	0.000196978	0.000672043	0.00127456	0.000660456	9.26956e-05	0.0002665	8.11086e-05	0.00015063
20154115	4.67831e-06	0	4.39761e-05	1.87132e-06	0.000839288	9.07591e-05	1.21636e-05	7.67242e-05	4.959e-05	0.000145027	5.05257e-05	1.40349e-05	4.67831e-06	0.000331224	0.00111157	0.000528649	0.000351809	0.000310639	0.000393913	0.000101987	0.000307833	0.000115086	0.00198922	0.0121065	0.00396346	9.07591e-05	0.000157191	0.000208652	0.000229237	5.70753e-05	0.000157191	0.000271342	0.000185261	0.000161869	6.54963e-06	0.000472509	0.00328417	9.82444e-05	0.000354616	0.000781277	0.000111344	0.00032561	0.000613794	0.000228301	0.00050245	0.000201167	0.000509	0.00015532	9.63731e-05
20154116	1.70627e-06	1.70627e-06	5.80132e-05	5.11881e-06	0.000848016	0.000179158	3.41254e-06	8.8726e-05	2.5594e-05	0.000174039	3.75379e-05	2.5594e-05	1.19439e-05	0.000414623	0.000945273	0.000801947	0.000576719	0.000341254	0.000371967	0.000156977	0.000313954	9.04323e-05	0.00180865	0.0107973	0.00390906	0.000153564	0.000180865	0.000576719	0.000435099	9.04323e-05	0.000225228	0.000487993	0.000286653	0.000286653	1.8769e-05	0.000868491	0.0305525	0.00015527	0.000754171	0.000948686	0.000158683	0.000563069	0.000938448	0.000307128	0.000743933	0.000247409	0.000689333	0.000264472	0.000126264
20154120	0	0	2.81524e-05	9.38412e-06	0.000609968	0.000103225	0	9.38412e-06	1.87682e-05	1.87682e-05	9.38412e-06	9.38412e-06	0	0.0005912	0.000581815	0.000938412	6.56888e-05	0.000206451	0.000375365	9.38412e-05	0.000469206	0.000140762	0.00047859	0.00406332	0.00145454	5.63047e-05	0.000103225	0.000403517	0.000516127	5.63047e-05	6.56888e-05	0.000234603	0.000178298	6.56888e-05	9.38412e-06	0.000731961	0.0449781	4.69206e-05	0.00849263	0.0010041	0.000422285	0.000675657	0.000816418	0.000140762	0.000534895	0.000140762	0.000525511	0.000168914	6.56888e-05
20154121	0	0	2.35866e-05	4.71732e-06	0.000646273	7.8622e-05	3.14488e-06	4.08835e-05	5.50354e-05	7.70496e-05	2.04417e-05	1.57244e-06	1.25795e-05	0.00046387	0.000882139	0.000654135	0.000283039	0.000311343	0.000301909	0.000157244	0.000551927	0.000121078	0.0013979	0.00814682	0.00278165	0.000124223	0.000114788	0.000314488	0.000498464	8.64842e-05	0.000154099	0.000526768	0.000336502	0.00014152	0	0.000647846	0.00837796	7.54772e-05	0.00109442	0.00122021	0.000331785	0.000794083	0.0012155	0.000246873	0.000754772	0.000213852	0.00072804	0.000305054	0.000232721
20154122	3.25579e-06	3.25579e-06	4.39532e-05	1.6279e-06	0.000641391	0.000118836	8.13948e-06	9.27901e-05	2.11626e-05	0.000117208	2.44184e-05	2.93021e-05	8.13948e-06	0.00034837	0.000675577	0.000582787	0.00021651	0.000395579	0.000301161	0.000198603	0.000392323	9.93016e-05	0.00160999	0.00726855	0.00237998	0.000105813	7.97669e-05	0.000170929	0.000327207	0.000107441	0.000102557	0.000319068	0.000234417	0.000105813	3.25579e-06	0.00052581	0.00243859	8.46506e-05	0.000608833	0.00136906	0.000265347	0.000537206	0.000599066	0.000328835	0.000660926	0.000118836	0.000520927	0.000229533	0.000126976
20154130	6.39685e-06	1.91905e-05	2.34551e-05	4.26457e-06	0.000403001	5.54393e-05	0	2.77197e-05	3.62488e-05	3.41165e-05	2.77197e-05	1.06614e-05	8.52913e-06	0.000213228	0.000748431	0.000550129	0.000413663	0.000375282	0.000341165	0.000238816	0.000311313	0.000381679	0.000703653	0.0041217	0.00162906	0.000183376	0.000144995	0.000176979	0.000311313	9.8085e-05	8.3159e-05	0.00034543	0.000200435	9.16881e-05	2.13228e-06	0.000509616	0.000872104	4.47779e-05	0.000138598	0.00270587	0.0002708	0.000452044	0.00043925	0.000142863	0.00036462	0.00010235	0.000396605	9.38204e-05	0.000100217
20154131	2.32922e-05	0.000119955	0.000108309	5.82305e-06	0.000947992	0.000135095	1.63045e-05	0.000112967	3.84321e-05	0.000132765	6.05597e-05	3.02798e-05	5.47366e-05	0.000666157	0.00132765	0.00103883	0.000685955	0.000613749	0.000690613	0.000289988	0.000610255	0.000294646	0.00223605	0.0091154	0.00276129	0.00017935	0.00019449	0.000369181	0.00049263	0.000137424	0.000270189	0.000633548	0.000348218	0.000217782	4.65844e-06	0.000762819	0.00295345	0.000109473	0.000774465	0.00366503	0.000348218	0.000777959	0.000981766	0.000350547	0.000920041	0.000163045	0.000886268	0.000294646	0.000150235
20154132	0	0	8.59291e-05	7.81174e-06	0.000925691	0.0001328	7.81174e-06	0.000109364	3.51528e-05	0.000128894	1.95293e-05	3.51528e-05	5.46822e-05	0.00101162	0.0014647	0.00182404	0.000437457	0.000804609	0.000999902	0.000511669	0.000808515	0.000351528	0.00306611	0.0152407	0.00442144	0.000308564	0.000429646	0.00113661	0.000812421	0.000402304	0.000335905	0.00103115	0.000456987	0.000687433	2.34352e-05	0.0015311	0.0117567	0.000117176	0.00389806	0.00267943	0.000578069	0.000753833	0.00160141	0.000453081	0.000796797	0.000363246	0.000960844	0.000417928	0.000199199
20154133	8.44901e-06	8.44901e-06	4.22451e-05	0	0.000920943	8.44901e-05	0	2.5347e-05	0	0.000177429	1.6898e-05	3.37961e-05	0	0.00109837	0.00152927	0.00119976	0.000414002	0.000608329	0.00107302	0.000261919	0.000777309	0.000464696	0.000718166	0.00354859	0.00136029	0.000447798	0.000152082	0.000397104	0.000608329	0.000278817	0.000321063	0.000633676	0.000692819	0.000177429	8.44901e-06	0.000811105	0.0025347	8.44901e-05	0.000870248	0.00908269	0.00025347	0.000608329	0.000726615	0.000152082	0.000878697	5.06941e-05	0.000498492	0.000211225	8.44901e-05
20154134	4.99293e-06	0	5.24258e-05	0	0.00108097	0.000102355	0	5.99152e-05	9.98587e-06	0.000134809	0.000139802	5.49223e-05	4.99293e-06	0.000913707	0.00140801	0.00175502	0.000411917	0.00062911	0.000936175	0.000409421	0.000981112	0.00054423	0.00083382	0.00448615	0.00165017	0.00024715	0.000232171	0.00079887	0.000609138	0.000197221	0.000352002	0.000646585	0.000471832	0.00037447	2.49647e-05	0.000743947	0.00241658	0.000139802	0.000983608	0.0711993	0.00045935	0.000708997	0.000636599	0.000347009	0.00108347	0.00012732	0.000644089	0.000314555	0.00012732
20154135	0.000232293	7.49333e-06	5.24533e-05	0	0.000322213	5.24533e-05	2.99733e-05	3.74667e-05	2.99733e-05	5.24533e-05	7.49333e-06	2.248e-05	0	0.0004496	0.000464587	0.00111651	0.000149867	0.00038216	0.00035968	0.000464587	0.000434613	0.00015736	0.000756826	0.00427869	0.00194077	0.00020232	7.49333e-05	0.00026976	0.000509547	0.000164853	5.99466e-05	0.00038216	0.000322213	0.000149867	0	0.00031472	0.0141999	3.74667e-05	0.0276804	0.011255	0.000194827	0.00031472	0.00058448	0.000307227	0.00113149	0.00017984	0.000464587	0.00035968	5.99466e-05
20154308	3.36177e-06	1.12059e-06	3.47383e-05	5.60294e-06	0.000653303	5.60294e-05	6.72353e-06	5.715e-05	2.24118e-05	7.28383e-05	2.4653e-05	5.60294e-06	3.36177e-06	0.000125506	0.000815789	0.000262218	0.000249891	0.000161365	0.000191621	5.82706e-05	0.000141194	7.50794e-05	0.00214145	0.0509991	0.00451037	0.000115421	9.74912e-05	0.000134471	0.000199465	6.49942e-05	8.85265e-05	0.000259977	0.000145677	7.73206e-05	3.36177e-06	0.0003429	0.00139513	8.62853e-05	0.000138953	0.00047625	4.81853e-05	0.000330574	0.000401171	0.000145677	0.000340659	0.000154641	0.000401171	0.000131109	6.49942e-05
20154309	1.19338e-05	2.98344e-06	2.23758e-05	1.49172e-06	0.000519119	0.000101437	1.49172e-06	4.47517e-05	1.93924e-05	0.000108896	6.26523e-05	1.64089e-05	2.98344e-06	0.000140222	0.000542987	0.000195416	0.000299836	0.000116354	0.000128288	4.92268e-05	0.000122321	7.0111e-05	0.00110537	0.00750187	0.00177217	5.07186e-05	2.83427e-05	9.39785e-05	9.09951e-05	2.23758e-05	4.77351e-05	0.000105912	5.81772e-05	3.87848e-05	7.45861e-06	0.000262543	0.000551937	2.6851e-05	5.66855e-05	0.000335638	4.02765e-05	0.000108896	0.00019094	7.60778e-05	0.000252101	4.02765e-05	0.000123813	6.56358e-05	3.43096e-05
20154313	5.19095e-06	6.48869e-06	4.54208e-05	1.29774e-06	0.000330923	8.30552e-05	2.59547e-06	3.89321e-05	1.29774e-05	4.02299e-05	2.07638e-05	9.08416e-06	2.33593e-05	0.000110308	0.000558027	0.000168706	0.000282907	0.000163515	0.000132369	7.3971e-05	0.00013756	7.78642e-05	0.00107582	0.0104143	0.00195958	5.19095e-05	6.61846e-05	9.73303e-05	0.000138858	4.28253e-05	4.67185e-05	0.000134965	4.9314e-05	2.9848e-05	2.59547e-06	0.000180385	0.000851316	5.96959e-05	7.9162e-05	0.000582684	5.58027e-05	0.000158324	0.000301075	0.000102521	0.000194661	6.48869e-05	0.000272525	6.22914e-05	4.15276e-05
20154314	5.96113e-06	5.96113e-06	2.98057e-05	1.98704e-06	0.000584191	7.94818e-05	1.98704e-06	5.36502e-05	2.38445e-05	7.35206e-05	4.17279e-05	1.19223e-05	1.98704e-06	0.000276199	0.000834559	0.00031594	0.000313953	0.000153002	0.00026229	0.0001073	0.000180821	7.55077e-05	0.00155586	0.0105333	0.00291897	0.000103326	6.75595e-05	0.000168899	0.000176847	3.77538e-05	9.93522e-05	0.000226523	0.000109287	0.000153002	5.96113e-06	0.000421253	0.00168303	5.56372e-05	0.000250368	0.000669634	8.743e-05	0.000248381	0.000417279	0.000125184	0.000319914	0.000139093	0.000294083	0.0001073	7.94818e-05
20154710	0	0	0.000452021	0.000322872	0.0227948	0.00142064	6.45745e-05	0.000129149	0.000129149	0.00213096	0.00154979	0.000968617	0	0.000322872	6.45745e-05	0.000129149	6.45745e-05	0.000129149	0.000129149	0.000193723	0	0.000129149	0.000193723	0.00316415	0.000452021	6.45745e-05	6.45745e-05	0.000322872	0.000387447	0.000129149	0.000322872	0.000387447	0.000129149	0.000387447	0	0.00103319	0.00142064	0	6.45745e-05	0.000904042	0	6.45745e-05	0	6.45745e-05	6.45745e-05	0	0.000129149	0	0
20154718	0	0	0.000412018	0.00025355	0.00488083	0.00110928	0	0.000221856	0	0.00180654	0.00177485	0.000221856	0	0.000158469	0.000126775	0.000316937	6.33874e-05	0.000158469	0.00025355	3.16937e-05	0.000158469	0	0.000412018	0.00145791	0.000570487	0.000126775	0.000126775	0.000982505	0.000412018	0.000221856	0.00025355	0.000316937	0.000190162	0.0010142	0	0.00117267	0.000728955	0	0.000316937	0.000633874	0	9.50811e-05	3.16937e-05	9.50811e-05	9.50811e-05	0	9.50811e-05	0	0
20154725	3.72439e-05	0	0.000223464	0.000837989	0.0110242	0.001527	0	0.000316574	0.000167598	0.0297952	0.0139479	0.001527	0	1.8622e-05	9.31099e-05	0.000111732	1.8622e-05	0.000111732	5.58659e-05	5.58659e-05	7.44879e-05	3.72439e-05	0.000242086	0.00126629	0.000335196	5.58659e-05	5.58659e-05	0.000204842	7.44879e-05	3.72439e-05	0.000167598	0.00018622	0.000204842	0.000148976	1.8622e-05	0.000242086	0.000409683	1.8622e-05	1.8622e-05	0.000465549	1.8622e-05	3.72439e-05	9.31099e-05	1.8622e-05	0.000111732	7.44879e-05	0.000111732	1.8622e-05	0.00018622
20154732	2.19891e-05	2.19891e-05	0.00134134	6.59674e-05	0.00496955	0.00252875	4.39783e-05	0.0010115	0.00050575	0.00219891	0.00419993	6.59674e-05	0	0.000109946	0.000197902	0.000131935	8.79565e-05	0.000109946	0.000175913	4.39783e-05	6.59674e-05	6.59674e-05	0.000637685	0.00279262	0.000703652	0.000131935	0.000285859	0.000527739	0.000483761	0.000109946	0.000219891	8.79565e-05	0.00026387	0.000483761	0	0.000725642	0.00050575	2.19891e-05	6.59674e-05	0.000571718	4.39783e-05	0.000219891	0.000153924	6.59674e-05	0.000307848	6.59674e-05	0.000109946	2.19891e-05	0
20154743	1.16584e-05	0	0.000384727	0.000198193	0.00577091	0.00475663	4.66336e-05	0.00022151	0.000198193	0.00634217	0.0235966	0.000128242	0	4.66336e-05	6.99505e-05	0.000163218	0	5.8292e-05	5.8292e-05	0.000116584	0.000139901	2.33168e-05	0.000209851	0.000862722	0.000408044	4.66336e-05	0.000116584	0.000338094	0.000163218	6.99505e-05	0.000163218	8.16089e-05	0.000186535	9.32673e-05	1.16584e-05	0.000524628	0.000629554	1.16584e-05	0.000104926	0.000408044	1.16584e-05	3.49752e-05	0.000139901	0	0.000174876	3.49752e-05	0.000104926	4.66336e-05	1.16584e-05
20154762	3.40499e-05	0	0.00120688	0.000170249	0.00733586	0.00220189	0.00010215	0.000385899	0.000272399	0.00230404	0.00367361	0.000249699	0	0.000139983	0.000226999	0.000211866	7.18831e-05	0.000196733	0.000185383	9.4583e-05	0.000200516	5.67498e-05	0.000393465	0.00124471	0.000612898	6.43165e-05	0.000200516	0.000401032	0.000401032	9.07997e-05	0.000359416	0.000264833	0.000105933	0.000155116	2.26999e-05	0.000802064	0.000828547	1.89166e-05	0.000105933	0.000491832	6.05331e-05	8.70164e-05	0.000192949	3.78332e-05	0.000139983	6.05331e-05	0.000177816	6.05331e-05	2.26999e-05
20154773	3.84448e-05	0	0.000538227	8.97045e-05	0.0131353	0.00153779	8.97045e-05	0.000551042	0.000269113	0.00716354	0.0014609	0.000474152	0	0.000217854	0.00093549	0.000397263	2.56299e-05	0.000205039	0.000230669	5.12597e-05	0.000192224	0.000179409	0.000307558	0.00175564	0.000589487	0.000153779	0.000153779	0.000499782	0.000512597	0.000205039	0.000448522	0.000346003	0.000256299	0.000153779	2.56299e-05	0.000999564	0.00096112	6.40746e-05	0.000102519	0.000768896	5.12597e-05	0.000102519	0.000397263	6.40746e-05	0.000307558	0.000102519	0.000384448	8.97045e-05	2.56299e-05
20154780	0	0	0.00105255	0	0.00526276	0.0136456	0.000150365	0.000112773	3.75912e-05	0.00962334	0.102624	0.000112773	0	0.000112773	0	7.51823e-05	3.75912e-05	7.51823e-05	3.75912e-05	7.51823e-05	3.75912e-05	3.75912e-05	0.000225547	0.000563867	0.000526276	0	0.000526276	0.000789414	0.000225547	7.51823e-05	0.00063905	0.000187956	0.000112773	0.000150365	0	0.000300729	0.00063905	7.51823e-05	7.51823e-05	0.00033832	3.75912e-05	3.75912e-05	0.000112773	3.75912e-05	0.000225547	0	3.75912e-05	3.75912e-05	3.75912e-05
20155335	0	0	1.72634e-05	0	0.000241688	1.72634e-05	0	0.00010358	1.72634e-05	0	0	1.72634e-05	0	0	6.90536e-05	1.72634e-05	0.00010358	6.90536e-05	5.17902e-05	3.45268e-05	5.17902e-05	5.17902e-05	0.000673273	0.00189897	0.000673273	3.45268e-05	0	5.17902e-05	1.72634e-05	0	5.17902e-05	1.72634e-05	8.6317e-05	1.72634e-05	0	6.90536e-05	0.000207161	3.45268e-05	3.45268e-05	6.90536e-05	0	0.000120844	5.17902e-05	6.90536e-05	0.000138107	3.45268e-05	0	3.45268e-05	0
20155353	0	0	0	0	0	4.26367e-05	0	4.26367e-05	0	0	0	0	0.00012791	8.52733e-05	0.00012791	8.52733e-05	0.000341093	4.26367e-05	0	0	0	8.52733e-05	0.000852733	0.00238765	0.000724823	4.26367e-05	4.26367e-05	0	0	0	0	0	0	8.52733e-05	0	4.26367e-05	0.000213183	0	4.26367e-05	0.000213183	0	0	0.000170547	4.26367e-05	8.52733e-05	0	0	0	0
20155359	9.62084e-06	1.92417e-05	2.88625e-05	0	0.000548388	4.81042e-05	9.62084e-06	0.000134692	2.88625e-05	7.69667e-05	9.62084e-06	0	1.92417e-05	0.000153933	0.000240521	0.000105829	0.000192417	6.73459e-05	5.77251e-05	1.92417e-05	3.84834e-05	9.62084e-06	0.000740805	0.00336729	0.000817772	3.84834e-05	1.92417e-05	7.69667e-05	0.000105829	9.62084e-06	3.84834e-05	4.81042e-05	3.84834e-05	9.62084e-06	0	0.000173175	0.000481042	5.77251e-05	3.84834e-05	0.000404075	1.92417e-05	7.69667e-05	8.65876e-05	1.92417e-05	0.000182796	8.65876e-05	5.77251e-05	2.88625e-05	3.84834e-05
20155389	5.82564e-05	4.36923e-05	4.36923e-05	1.45641e-05	0.000393231	0.000291282	0	0.000349538	0.000145641	0.000131077	4.36923e-05	1.45641e-05	2.91282e-05	5.82564e-05	0.000669948	0.000174769	0.000131077	7.28205e-05	0.000189333	5.82564e-05	5.82564e-05	7.28205e-05	0.001136	0.00630625	0.00104861	1.45641e-05	2.91282e-05	0.000145641	0.000101949	0	1.45641e-05	0.000189333	2.91282e-05	5.82564e-05	0	0.000203897	0.000451487	2.91282e-05	1.45641e-05	0.0012962	1.45641e-05	0.000116513	0.000305846	5.82564e-05	0.000305846	2.91282e-05	5.82564e-05	0.000262154	1.45641e-05
20155395	5.4609e-05	8.19135e-05	5.4609e-05	0	0.00054609	0.000273045	0	0.000737221	2.73045e-05	0.000163827	8.19135e-05	0	0	5.4609e-05	0.000982962	5.4609e-05	0.000491481	8.19135e-05	5.4609e-05	8.19135e-05	5.4609e-05	0.000109218	0.0012014	0.00895588	0.0012014	2.73045e-05	2.73045e-05	0.000136522	0.000136522	5.4609e-05	5.4609e-05	0.000163827	5.4609e-05	0	0	0.000136522	0.000136522	0.000327654	5.4609e-05	0.0012014	5.4609e-05	0.000109218	0.000327654	0.000109218	0.000191131	5.4609e-05	0	8.19135e-05	0
20155509	1.21961e-05	4.87845e-05	9.7569e-05	3.04903e-06	0.000326246	6.40297e-05	9.14709e-06	0.000115863	5.48826e-05	3.35393e-05	6.09806e-05	9.14709e-06	1.52452e-05	0.000100618	0.000329295	0.000277462	0.000210383	0.00015855	0.000167697	3.65884e-05	7.01277e-05	7.31768e-05	0.000954347	0.00602184	0.00177454	5.18335e-05	4.26864e-05	6.70787e-05	0.000131108	2.74413e-05	3.96374e-05	9.7569e-05	6.40297e-05	3.65884e-05	3.04903e-06	0.000155501	0.000496992	1.21961e-05	8.84219e-05	0.00044211	0.000109765	0.000128059	0.000128059	0.000100618	0.00021953	3.35393e-05	0.000201236	8.23238e-05	5.79316e-05
20155510	1.35429e-05	2.70859e-05	7.85491e-05	0	0.000390037	5.28175e-05	4.06288e-06	5.68804e-05	1.89601e-05	6.09432e-05	3.52116e-05	1.48972e-05	2.3023e-05	8.53205e-05	0.000468586	0.000231584	0.000264087	0.000127304	0.000111052	5.95889e-05	0.000108344	0.000131367	0.000942589	0.00528446	0.00162109	9.34463e-05	7.58405e-05	0.000115115	0.000100218	2.84402e-05	8.80291e-05	0.000162515	0.000132721	4.87546e-05	0	0.000153035	0.000417123	2.84402e-05	0.000108344	0.000457751	7.85491e-05	0.000204498	0.000165224	7.58405e-05	0.000178767	4.74003e-05	0.000166578	0.000142201	3.11488e-05
20155511	2.24022e-05	0.000363413	4.72934e-05	4.97826e-06	0.000229	8.21412e-05	0	6.22282e-05	2.24022e-05	3.73369e-05	1.9913e-05	1.74239e-05	1.9913e-05	9.95651e-05	0.000410706	0.000296206	0.000121967	0.000144369	0.000112011	3.48478e-05	0.000129435	7.46739e-05	0.000756695	0.00456506	0.00161793	0.000107033	4.97826e-05	0.000129435	0.000112011	5.22717e-05	2.48913e-05	0.000189174	5.22717e-05	2.98695e-05	0	9.95651e-05	0.000308652	3.23587e-05	5.97391e-05	0.000390793	3.98261e-05	9.95651e-05	0.000159304	6.72065e-05	0.000149348	7.7163e-05	0.000169261	6.72065e-05	4.72934e-05
20155512	5.23911e-06	4.45325e-05	3.66738e-05	0	0.000217423	6.28694e-05	0	6.28694e-05	2.3576e-05	1.83369e-05	5.23911e-06	2.61956e-06	1.04782e-05	6.28694e-05	0.000461042	0.000112641	0.000133597	9.4304e-05	8.12063e-05	8.12063e-05	0.000136217	0.000151934	0.00077015	0.00443753	0.00135955	6.28694e-05	2.88151e-05	0.000107402	6.54889e-05	4.19129e-05	5.23911e-05	0.000154554	5.50107e-05	9.16845e-05	2.61956e-06	9.95431e-05	0.000348401	3.14347e-05	7.59671e-05	0.000696802	2.3576e-05	9.69236e-05	0.00011788	3.66738e-05	0.00017551	2.09565e-05	8.64454e-05	6.02498e-05	4.97716e-05
20155707	0	4.00288e-06	3.40245e-05	0	0.000476342	0.000123089	1.70122e-05	6.70482e-05	1.70122e-05	5.80417e-05	2.90209e-05	8.00576e-06	2.20158e-05	0.000193139	0.000645464	0.000448322	0.00018113	0.000237171	0.000240173	9.20662e-05	0.000196141	0.00011108	0.00441117	0.0629272	0.0644924	0.00018013	0.000108078	0.000184132	0.000255183	0.000118085	0.000154111	0.000276199	0.000156112	0.000156112	6.00432e-06	0.000430309	0.00150608	0.000146105	0.000164118	0.000577415	9.10655e-05	0.000392282	0.000572412	0.000307221	0.00050036	0.000246177	0.000537386	0.0001391	0.000102073
20155708	2.78446e-06	2.78446e-06	3.43416e-05	7.42522e-06	0.000798211	0.000115091	6.49707e-06	5.19765e-05	2.22757e-05	8.63182e-05	2.78446e-05	1.02097e-05	1.48504e-05	0.000237607	0.00080378	0.000516981	0.000250601	0.000246889	0.000259883	9.46716e-05	0.000191199	0.000105809	0.00276682	0.038936	0.00757094	0.000118804	0.000109522	0.000225541	0.000289584	0.000106738	0.000155001	0.000352698	0.000157786	0.00012066	1.11378e-05	0.000503059	0.00387968	9.0959e-05	0.000298865	0.000621862	0.000136438	0.00030165	0.000776864	0.000407459	0.000529975	0.000286799	0.000563389	0.000188415	0.000106738
20155715	2.75423e-06	2.75423e-06	3.5805e-05	5.50846e-06	0.000795972	0.000112923	1.37711e-05	4.95761e-05	1.92796e-05	0.000112923	6.88557e-05	1.37711e-05	2.75423e-06	0.000212076	0.00136885	0.000537075	0.000360804	0.000245126	0.000446185	8.81353e-05	0.000369067	0.000101906	0.00299385	0.017101	0.0050788	0.000129449	0.000115678	0.000308474	0.000336016	3.5805e-05	0.000115678	0.000341524	0.000280931	0.000184533	5.50846e-06	0.000479236	0.00550295	0.000112923	0.000487499	0.000685803	0.000126695	0.000369067	0.000735379	0.000275423	0.000583897	0.000176271	0.000537075	0.000140466	9.6398e-05
20156112	0	0	3.4236e-05	0.000136944	0.00164333	6.8472e-05	0	3.4236e-05	0	0.000308124	0.000102708	3.4236e-05	0	0.00318395	0.00352631	0.00311548	0.000205416	0.000616248	0.00136944	0.00136944	0.0523126	0.000273888	0.00017118	0.00270465	0.00154062	6.8472e-05	0.000102708	0.000582012	0.000308124	6.8472e-05	0.000102708	0.000890137	0.000376596	0.000582012	0	0.000616248	0.000445068	0.000136944	0.000376596	0.00900407	0.00112979	0.000958609	0.000924373	0.000445068	0.00236229	0.000239652	0.00109555	0.000890137	0.000273888
20156115	0	0	8.69716e-05	0	0.00147852	0.000260915	0	0.000260915	0	0.000173943	0.000434858	0	8.69716e-05	0.00052183	0.00173943	0.00165246	8.69716e-05	0.000608802	0.000608802	0.000347887	0.00321795	0.000260915	0.00052183	0.00321795	0.00287006	0.000608802	0	0.000260915	0.00130457	8.69716e-05	0	0.000869716	0.000434858	0.000608802	0	0.00052183	0.00139155	0.000173943	8.69716e-05	0.00347887	0.000695773	0.000956688	0.00217429	0.000608802	0.00260915	8.69716e-05	0.00321795	0.00139155	0.000434858
20156118	2.22305e-05	7.41015e-06	2.96406e-05	7.41015e-06	0.00124491	9.6332e-05	7.41015e-06	5.92812e-05	1.48203e-05	0.000933679	2.22305e-05	0	7.41015e-06	0.00646906	0.0529678	0.0131827	0.00528344	0.0046684	0.0381697	0.00167469	0.00297147	0.00250463	0.00048166	0.00280104	0.00107447	0.00095591	0.000770656	0.00172657	0.00143016	0.000622453	0.000711375	0.00347536	0.00128196	0.00097814	2.22305e-05	0.00271212	0.000874398	0.000185254	0.000214894	0.00583179	0.000140793	0.000444609	0.000681734	0.000518711	0.0010226	0.000170433	0.00048907	0.00047425	0.000140793
20156119	0	0	0.000309885	0	0.00142547	0.000123954	0	0.000185931	0	6.19771e-05	0	0	6.19771e-05	0.000371862	0.000867679	0.000743725	0.000185931	0.000433839	0.000371862	0.000185931	0.00935854	6.19771e-05	0.000123954	0.00142547	0.000619771	0	6.19771e-05	0.000123954	6.19771e-05	6.19771e-05	0.000371862	0.000433839	0.000309885	0.000123954	6.19771e-05	0.000433839	0.000309885	0	0.000123954	0.00210722	0.00272699	0.00117756	0.000929656	0.000123954	0.00123954	0.000185931	0.00154943	0.000371862	0.000371862
20156121	0	3.30841e-05	3.30841e-05	3.30841e-05	0.000397009	0.000132336	0	6.61682e-05	0	0.000198505	0	3.30841e-05	0	0.00109178	0.000794018	0.00129028	0.00016542	0.000496261	0.000661682	0.0012572	0.089294	0	0.000198505	0.00205121	0.000893271	0	0	6.61682e-05	9.92523e-05	6.61682e-05	6.61682e-05	0.00056243	9.92523e-05	0	0	0.000231589	0.000794018	6.61682e-05	0	0.0020843	0.00218355	0.00135645	0.000430093	6.61682e-05	0.000694766	0.000198505	0.00122411	0.000231589	0.000132336
20156124	0.000246295	1.44879e-05	0.000115903	0	0.000188343	7.24396e-05	0	7.24396e-05	1.44879e-05	4.34638e-05	1.44879e-05	0	1.44879e-05	0.000391174	0.0052736	0.00155021	0.0014343	0.00163714	0.00202831	0.000231807	0.000521565	0.00104313	0.000449126	0.00323081	0.000912739	0.000449126	8.69275e-05	0.000188343	0.000289758	0.000376686	0.000202831	0.00076786	0.000260783	0.000188343	0	0.000289758	0.000449126	0.000173855	7.24396e-05	0.00385379	7.24396e-05	0.000246295	0.000391174	0.000188343	0.000565029	1.44879e-05	0.000246295	0.000173855	0.000115903
20156127	4.99604e-06	4.99604e-06	3.49723e-05	3.3307e-06	0.000321412	4.66298e-05	1.66535e-06	0.000101586	6.66139e-06	5.16258e-05	1.83188e-05	4.99604e-06	3.3307e-06	0.000263125	0.00257796	0.00104251	0.000995878	0.000761064	0.000940922	0.000159873	0.000328074	0.0010092	0.000341396	0.00251301	0.000789375	0.000363046	0.000131563	0.000519589	0.000379699	0.000291436	0.000271452	0.000782714	0.000369707	0.00026479	9.99209e-06	0.000549565	0.00040801	0.000106582	0.00011824	0.0176827	8.16021e-05	0.000184854	0.000258129	0.000114909	0.000887631	7.49407e-05	0.000269786	0.000216495	4.49644e-05
20156130	0	0	0.000120113	0	0.000360339	0.000180169	0	6.00565e-05	0	0.000360339	0	0	0	0.000360339	0.00120113	0.000300282	0.000300282	0.000300282	6.00565e-05	0.000120113	0.000960903	6.00565e-05	0.000600565	0.00270254	0.00120113	6.00565e-05	0	0.000480452	0.000240226	6.00565e-05	0.000120113	0.000180169	0	6.00565e-05	0	0.000120113	0.000720677	6.00565e-05	0.000120113	0.00174164	0.00900847	0.00570536	0.0123716	0.000240226	0.00582548	0.000960903	0.176926	0.00750706	0.000480452
20156139	1.33998e-05	0	4.01994e-05	0	0.00064319	6.6999e-05	1.33998e-05	0.000120598	1.33998e-05	4.01994e-05	2.67996e-05	1.33998e-05	0	0.000562791	0.00140698	0.000817388	0.000214397	0.000415394	0.000750389	0.000133998	0.000830787	5.35992e-05	0.000562791	0.00387254	0.00172857	0.000133998	8.03988e-05	0.000200997	0.000254596	0.000133998	0.000147398	0.000214397	0.000107198	9.37986e-05	1.33998e-05	0.000187597	0.00107198	8.03988e-05	0.000482393	0.00300155	0.00187597	0.00351075	0.0122072	0.00116578	0.0321059	0.00068339	0.0239186	0.0290642	0.00065659
20156142	3.23677e-05	0	8.09192e-05	1.61838e-05	0.00700761	0.000161838	1.61838e-05	0.000356045	3.23677e-05	0.000534067	3.23677e-05	4.85515e-05	0	0.000938663	0.000679722	0.000760641	0.000226574	0.000275125	0.000339861	0.000161838	0.00140799	9.71031e-05	0.000258942	0.00152128	0.000501699	9.71031e-05	0.00021039	0.000323677	0.000194206	8.09192e-05	0.00021039	0.000291309	8.09192e-05	4.85515e-05	0	0.000372229	0.00042078	0	6.47354e-05	0.00131089	0.0129956	0.00255705	0.00190969	0.000485515	0.00147273	0.000323677	0.00488752	0.000712089	0.000242758
20156152	0	0	0.00022945	3.44175e-05	0.00227155	0.000332702	4.589e-05	0.00022945	5.73625e-05	0.000298285	0.000206505	6.8835e-05	0	0.000562152	0.00143406	0.000722767	0.000309757	0.000814547	0.000940745	0.00022945	0.00188149	0.000332702	0.000424482	0.00260426	0.000929272	5.73625e-05	8.03075e-05	0.00027534	0.000298285	6.8835e-05	6.8835e-05	0.000573625	0.000149142	0.000172087	1.14725e-05	0.000332702	0.00138817	5.73625e-05	0.000309757	0.00282223	0.00181265	0.00129639	0.00393507	0.000298285	0.00278782	0.000539207	0.00470372	0.00201916	0.000344175
20156155	0.000708383	0	2.95159e-05	0	0.000177096	2.95159e-05	2.95159e-05	1.4758e-05	1.4758e-05	1.4758e-05	1.4758e-05	0	1.4758e-05	0.000841204	0.0152007	0.00132822	0.00612456	0.0014758	0.00274498	0.000177096	0.000354191	0.00184475	0.000250885	0.00256789	0.000959268	0.000531287	8.85478e-05	0.000295159	0.000398465	0.000354191	0.000206612	0.000546045	0.000280401	0.00022137	4.42739e-05	0.000560803	0.000132822	5.90319e-05	2.95159e-05	0.00365998	5.90319e-05	0.000162338	0.000368949	0.000295159	0.000368949	5.90319e-05	0.000442739	7.37898e-05	1.4758e-05
20156158	3.35848e-05	0	0.000313459	2.23899e-05	0.00183597	0.000223899	2.23899e-05	0.000167924	0.000156729	0.000291069	8.95596e-05	6.71697e-05	0	0.000850816	0.00150012	0.000940376	0.000145534	0.000380628	0.000458993	0.000705282	0.00954929	0.000156729	0.000436603	0.00145534	0.000391823	0.000156729	0.000123144	0.000414213	0.000223899	8.95596e-05	0.000156729	0.000794841	0.000201509	7.83646e-05	0	0.000727672	0.000682892	3.35848e-05	2.23899e-05	0.000985155	0.00175761	0.00129861	0.00228377	0.000212704	0.00125383	0.000111949	0.00192553	0.000582137	0.000246289
20156164	0	0	1.98291e-05	0	0.00043624	1.98291e-05	1.98291e-05	1.98291e-05	0	3.96581e-05	5.94872e-05	3.96581e-05	0	0.016121	0.00945847	0.0275029	0.00105094	0.00158633	0.029704	0.00176479	0.0778291	0.000812992	0.00043624	0.0032718	0.00239932	0.000198291	0.000138804	0.000277607	0.00063453	3.96581e-05	0.000178462	0.000773334	0.00043624	0.000237949	3.96581e-05	0.000793163	0.00146735	3.96581e-05	0.000158633	0.00404513	0.000555214	0.00132855	0.00150701	0.000317265	0.00101128	0.000118974	0.00132855	0.000674188	0.000257778
20156167	0	0	0	0	0.00103826	0.000307633	3.84541e-05	0.000153817	0	3.84541e-05	0	0	0	0.000769083	0.000499904	0.00180734	0.000153817	0.00065372	0.000307633	0.000115362	0.0018458	7.69083e-05	0.000538358	0.00196116	0.000422996	0.000115362	0.000115362	3.84541e-05	0.000307633	0.000115362	3.84541e-05	0.000346087	0.000192271	0.000115362	0	0.00138435	0.000845991	3.84541e-05	0.000115362	0.000922899	0.205537	0.0387233	0.00388387	0.000230725	0.00192271	0.00065372	0.00634493	0.00103826	0.00269179
20156170	0	0.00211678	0.000103258	5.16289e-05	0.00273633	0.000671176	5.16289e-05	0.000722804	0.000103258	0.000413031	5.16289e-05	5.16289e-05	0	0.000413031	0.000722804	0.000567918	0.000258144	0.000361402	0.000413031	0.00046466	0.00371728	0	0.000826062	0.00180701	0.00129072	5.16289e-05	5.16289e-05	0.00046466	0.000258144	0.000154887	0.000154887	0.000516289	0.000154887	0.000103258	0	0.000826062	0.00108421	0	0.000154887	0.00170375	0.00129072	0.000361402	0.000619547	0.000206516	0.000774433	5.16289e-05	0.00113584	0.000309773	0.000103258
20156173	1.31073e-05	0	1.31073e-05	0	0.000229377	6.55364e-05	0	4.58755e-05	0	9.17509e-05	0	1.31073e-05	6.55364e-06	0.000393218	0.0014418	0.00113378	0.000157287	0.000471862	0.00079299	0.000262146	0.000871634	0.000281806	0.000275253	0.00225445	0.00108135	9.83046e-05	3.93218e-05	0.000196609	0.000268699	0.000104858	0.000203163	0.000294914	9.17509e-05	7.209e-05	0	0.000425986	0.000851973	0.000642257	0.000235931	0.0223872	0.000511184	0.00115344	0.0042271	0.000930617	0.0400362	0.000471862	0.00292292	0.00438438	0.000255592
20156176	3.0645e-05	6.129e-05	0.000191531	3.83063e-05	0.00190765	0.000214515	4.59675e-05	0.000360079	0.000107258	0.000206854	0.000137903	4.59675e-05	1.53225e-05	0.00100362	0.00386127	0.00195362	0.000467336	0.00102661	0.00287297	0.000482659	0.00350885	0.000543949	0.000505643	0.00365442	0.00180806	9.1935e-05	9.95963e-05	0.000413708	0.000283466	0.000153225	0.000130241	0.000559271	0.000260483	0.000390724	1.53225e-05	0.000505643	0.00124878	7.66125e-05	0.00024516	0.00643545	0.000651206	0.00131774	0.00337095	0.000566933	0.00335563	0.000482659	0.00400683	0.00242862	0.000291128
20156185	1.18202e-05	0	0.000130022	1.18202e-05	0.000957435	0.000165483	4.72808e-05	0.000153662	5.9101e-05	0.000165483	7.09211e-05	3.54606e-05	1.18202e-05	0.00184395	0.00804955	0.00426709	0.001052	0.00198579	0.00566187	0.00061465	0.00143024	0.000898335	0.000437347	0.00300233	0.00151298	0.000449167	0.000330965	0.00100472	0.000780133	0.000283685	0.000390066	0.00139478	0.000543729	0.000851054	0	0.00131204	0.000898335	0.000200943	0.000484628	0.0204135	0.000236404	0.000354606	0.00108746	0.000319145	0.00338057	0.000141842	0.000496448	0.000567369	5.9101e-05
20156188	0	0	0	5.20806e-05	0.00104161	0.000208322	0.000104161	0.000156242	0	0.000260403	0	5.20806e-05	0	0.00171866	0.00114577	0.00286443	0.000260403	0.000624967	0.000781209	0.00343732	0.0907244	0.000260403	0.00083329	0.00249987	0.000624967	0.000156242	0	0.000312484	0.000208322	5.20806e-05	0.000364564	0.00213531	0.000208322	0.000260403	0	0.000729129	0.000781209	0	0.000104161	0.00182282	0.00177074	0.000677048	0.00104161	5.20806e-05	0.00104161	0	0.000624967	0.000312484	0.000156242
20156191	0	0	0.000101598	0	0.000787382	0.000228595	2.53994e-05	7.61982e-05	2.53994e-05	5.07988e-05	2.53994e-05	0	0	0.000609586	0.000380991	0.00086358	0.000152396	7.61982e-05	0.000304793	0.000533388	0.00137157	2.53994e-05	0.00104138	0.00193035	0.000711183	5.07988e-05	5.07988e-05	0.000126997	0.00040639	7.61982e-05	2.53994e-05	0.000203195	0.000355592	0	0	0.00043179	0.000507988	5.07988e-05	0.000101598	0.00109217	0.0879327	0.0167382	0.0044449	0.000736583	0.00182876	0.000685784	0.115389	0.00149856	0.000685784
20156194	0	0	0	0	0.00100245	0.000250612	1.92779e-05	0.000212056	1.92779e-05	7.71114e-05	1.92779e-05	1.92779e-05	0	0.00275673	0.00755692	0.00624602	0.000963893	0.00138801	0.00732558	0.000751836	0.00424113	0.000636169	0.000616891	0.00375918	0.00185067	0.000134945	0.000134945	0.000462668	0.000289168	0.000424113	9.63893e-05	0.00142656	0.000308446	0.000443391	0	0.000385557	0.000655447	5.78336e-05	0.000520502	0.00628458	0.000366279	0.000443391	0.00127234	0.00080967	0.000655447	0.000231334	0.000886781	0.000636169	9.63893e-05
20156199	1.34525e-05	2.69051e-06	0.000199098	3.49766e-05	0.00230038	0.000239455	1.0762e-05	0.000408957	6.45722e-05	0.000379362	7.53342e-05	3.76671e-05	1.34525e-05	0.00122149	0.0011058	0.00149323	0.000304027	0.000691461	0.00107351	0.000430481	0.00407612	0.000306718	0.000521959	0.00232191	0.00102508	0.000180264	0.000287884	0.000433172	0.000578459	0.000207169	0.000400886	0.000753342	0.000287884	0.000349766	1.0762e-05	0.00128875	0.00058115	4.30481e-05	0.000180264	0.00199636	0.0068312	0.00288692	0.00306449	0.000403576	0.0018699	0.000277122	0.00410572	0.000960511	0.000295956
20156539	1.01576e-05	0.000178266	9.3958e-06	1.01576e-06	6.80561e-05	1.80298e-05	2.79335e-06	5.84063e-06	3.55517e-06	8.38004e-06	4.57093e-06	1.2697e-06	1.52364e-06	4.67251e-05	0.000896918	0.000110718	0.00017979	8.9641e-05	8.68477e-05	1.32049e-05	4.44396e-05	0.000213564	0.000174457	0.00132709	0.00045176	6.60246e-05	1.80298e-05	6.06918e-05	3.58056e-05	2.59019e-05	3.96147e-05	8.30386e-05	4.59633e-05	4.03766e-05	3.30123e-06	4.77408e-05	0.000241244	4.57093e-06	3.02189e-05	8.9895e-05	2.46322e-05	4.6979e-05	4.01226e-05	2.53941e-05	4.85027e-05	1.16813e-05	3.91069e-05	2.28547e-05	8.1261e-06
20156540	7.5298e-06	9.14871e-05	1.88245e-05	1.50596e-06	0.000109935	3.53901e-05	3.01192e-06	2.78603e-05	4.14139e-06	2.71073e-05	1.20477e-05	1.88245e-06	5.27086e-06	4.10374e-05	0.000873833	0.000111065	0.000371596	0.000172432	9.2993e-05	2.67308e-05	6.09914e-05	0.000331688	0.000244719	0.00167199	0.000476636	0.000128383	2.37189e-05	8.99811e-05	6.13679e-05	5.34616e-05	4.02844e-05	0.000111818	7.04036e-05	4.29199e-05	2.25894e-06	8.54632e-05	0.000129136	1.9201e-05	1.95775e-05	0.000160761	2.71073e-05	3.7649e-05	5.12026e-05	3.20017e-05	4.81907e-05	8.43338e-05	7.3792e-05	1.7695e-05	1.16712e-05
20156541	0.000187703	3.05209e-05	1.52604e-05	3.05209e-06	0.000454761	6.25678e-05	1.52604e-06	2.89948e-05	4.57813e-06	3.81511e-05	5.18855e-05	6.10418e-06	3.05209e-06	0.000312839	0.0340079	0.000598209	0.0112881	0.00132461	0.00141006	0.000102245	0.000167865	0.00399671	0.00109417	0.00380138	0.000985825	0.000955304	5.49376e-05	0.000393719	0.000186177	0.000451709	0.000235011	0.000526485	0.00021975	0.000206016	2.89948e-05	0.000329626	0.000100719	8.24064e-05	1.52604e-05	0.00239284	3.3573e-05	0.000119031	0.000189229	0.000180073	0.000340308	7.78283e-05	0.000180073	4.73074e-05	4.27292e-05
20157015	0	0	0.000228545	0	0.000495182	3.80909e-05	0	0	0	7.61818e-05	0	0	0	0.000114273	0.000266636	0.000342818	0	0.000152364	0.000152364	7.61818e-05	0.000647545	3.80909e-05	0.000837999	0.00346627	0.00495182	0.000114273	3.80909e-05	0	0.000114273	3.80909e-05	3.80909e-05	0.000266636	3.80909e-05	3.80909e-05	0	0.000152364	0.000571363	0	0.000152364	0.000457091	0.00312345	0.033101	0.00441854	0.00232354	0.00217118	0.005028	0.00346627	0.000380909	0.107416
20157017	0	0	4.91304e-05	2.80745e-05	0.00435155	0.000112298	7.01863e-06	6.31676e-05	3.50931e-05	0.000533416	0.000112298	4.91304e-05	0	9.12422e-05	0.000287764	0.000189503	0.000147391	0.000119317	0.000259689	2.80745e-05	0.000196522	0.000105279	0.000659751	0.00272323	0.00166341	1.40373e-05	6.31676e-05	7.72049e-05	9.82608e-05	2.10559e-05	7.72049e-05	0.000105279	5.6149e-05	4.21118e-05	0	0.00015441	0.000400062	2.80745e-05	7.01863e-05	0.000245652	5.6149e-05	0.000231615	0.000379006	0.000266708	0.000182484	4.21118e-05	0.00015441	0.000140373	0.000364969
20157021	0	0	5.60832e-05	0	0.00102819	7.47775e-05	0	7.47775e-05	1.86944e-05	0.000168249	7.47775e-05	0	0	1.86944e-05	0.000205638	3.73888e-05	1.86944e-05	0.000186944	9.34719e-05	0.000130861	0.000112166	5.60832e-05	0.00779556	0.0101137	0.00624392	7.47775e-05	3.73888e-05	0.000149555	0.000112166	1.86944e-05	5.60832e-05	0.000130861	9.34719e-05	7.47775e-05	0	0.000112166	0.000224333	0	1.86944e-05	0.000317805	1.86944e-05	0.000168249	0.000261721	0.000149555	0.000168249	5.60832e-05	0.000130861	0.000130861	7.47775e-05
20157027	0	0	3.1509e-05	0	0.000850742	3.1509e-05	0	6.30179e-05	0	0.000220563	0	0	0	0.000189054	0.000157545	0.000252072	0	6.30179e-05	0.000157545	6.30179e-05	3.1509e-05	3.1509e-05	0.00163847	0.00425371	0.00230015	0	3.1509e-05	0.000220563	9.45269e-05	3.1509e-05	0.000126036	0.00031509	0.000126036	0.000126036	0	0.000346599	0.00059867	0	0	6.30179e-05	0.000189054	0.000661688	0.000504143	0.000409617	0.000535652	9.45269e-05	0.000441126	0.000189054	0.000567161
20157032	2.78769e-05	0	2.78769e-05	0	0.000919938	2.78769e-05	0	2.78769e-05	0	0.000111508	8.36307e-05	2.78769e-05	0	8.36307e-05	0.000334523	0.000223015	8.36307e-05	0.000139384	8.36307e-05	0.000139384	0.000111508	2.78769e-05	0.00150535	0.00273194	0.00147748	5.57538e-05	0.000111508	0.000195138	2.78769e-05	5.57538e-05	0	0	0	8.36307e-05	0	0.000250892	0.000557538	0	8.36307e-05	0.000195138	0.000306646	0.000613292	0.000724799	0.0003624	0.000278769	2.78769e-05	0.000696922	8.36307e-05	0.000418153
20157034	0	0	4.78985e-05	2.39492e-05	0.000742426	0.000119746	0	0	0	0.000119746	2.39492e-05	0	0	7.18477e-05	0.000431086	0.000119746	9.57969e-05	0.000263442	7.18477e-05	2.39492e-05	7.18477e-05	2.39492e-05	0.000431086	0.00246677	0.00186804	2.39492e-05	0.000239492	0.000167645	0.000119746	7.18477e-05	4.78985e-05	0.000119746	4.78985e-05	0.000215543	0	0.000167645	0.000910071	2.39492e-05	0	0.000215543	7.18477e-05	0.000359238	0.000550832	0.000718477	0.00062268	0.00031134	0.00031134	0.000143695	0.000694528
20157043	1.39923e-05	0	2.79846e-05	8.39537e-05	0.0245005	0.000153915	0	8.39537e-05	5.59691e-05	0.00183299	0.000139923	0.00012593	0	5.59691e-05	0.000251861	0.000167907	2.79846e-05	0.000153915	0.000153915	5.59691e-05	0.000279846	4.19768e-05	0.000265853	0.00257458	0.0012733	1.39923e-05	0.000195892	9.79459e-05	5.59691e-05	4.19768e-05	0.00012593	0.000195892	0.000153915	9.79459e-05	0	0.000377791	0.000461745	2.79846e-05	2.79846e-05	0.000209884	0.000223876	0.000587676	0.000657637	0.000167907	0.000167907	4.19768e-05	0.000139923	0.00012593	0.000153915
20157060	1.99358e-05	0	0	9.9679e-06	0.000598074	2.99037e-05	9.9679e-06	1.99358e-05	9.9679e-06	7.97432e-05	1.99358e-05	2.99037e-05	0	0.000388748	0.000328941	0.000229262	3.98716e-05	0.000109647	0.000159486	4.98395e-05	0.000149519	0.00042862	0.000777496	0.00359841	0.00412671	5.98074e-05	2.99037e-05	4.98395e-05	1.99358e-05	0.000129583	1.99358e-05	0.000109647	0.000129583	7.97432e-05	9.9679e-06	0.000109647	0.000737625	6.97753e-05	1.99358e-05	0.000309005	0.000129583	0.00112637	0.000318973	0.000388748	0.000328941	0.000149519	0.000677817	9.9679e-05	0.00163474
20157086	0	0	0	0	0.00138138	3.003e-05	0	3.003e-05	9.00901e-05	0.00015015	6.00601e-05	0	0	0.00012012	0.00033033	0.00024024	6.00601e-05	0.00015015	0.00018018	0.00015015	6.00601e-05	0.00018018	0.00045045	0.00366366	0.00246246	6.00601e-05	9.00901e-05	3.003e-05	3.003e-05	0.00018018	6.00601e-05	0.00015015	0	0.00015015	0	6.00601e-05	0.00144144	0.00021021	6.00601e-05	0.00048048	9.00901e-05	0.00225225	0.00045045	0.00174174	0.000630631	0.00018018	0.000570571	0.00021021	0.00525526
20157099	4.46138e-05	0	8.92276e-06	8.92276e-06	0.000910121	8.92276e-05	0	1.78455e-05	3.5691e-05	6.24593e-05	3.5691e-05	1.78455e-05	0	0.000151687	0.000330142	0.000312296	1.78455e-05	0.000267683	0.000196301	5.35365e-05	0.000196301	5.35365e-05	0.000856585	0.00367618	0.00201654	0	0.000214146	0.000178455	9.81503e-05	0.000124919	7.1382e-05	5.35365e-05	7.1382e-05	3.5691e-05	0	0.000196301	0.000820894	2.67683e-05	7.1382e-05	0.000196301	8.92276e-05	0.000669207	0.000481829	0.000455061	0.000285528	0.000107073	0.000249837	0.000231992	0.000883353
20157411	0	0	1.00033e-05	0	0.000440145	4.00132e-05	0	4.00132e-05	2.00066e-05	6.00198e-05	0	0	0	0.000170056	0.000230076	0.000310102	4.00132e-05	8.00264e-05	0.000180059	9.00297e-05	0.000140046	4.00132e-05	0.00100033	0.00348115	0.00305101	6.00198e-05	6.00198e-05	0.00012004	0.000110036	5.00165e-05	9.00297e-05	0.000100033	4.00132e-05	6.00198e-05	0	0.000190063	0.000600198	7.00231e-05	5.00165e-05	0.000440145	0.000270089	0.00295097	0.00396131	0.012074	0.00173057	0.00759251	0.00255084	0.000510168	0.0265188
20157412	0	0	0	0	0.00013557	0	0	1.93671e-05	1.93671e-05	3.87342e-05	1.93671e-05	0	0	0.000116203	0.000271139	0.000193671	5.81013e-05	9.68354e-05	7.74683e-05	0	0.000213038	1.93671e-05	0.00348608	0.00615873	0.00358291	1.93671e-05	1.93671e-05	3.87342e-05	0.000116203	7.74683e-05	0	3.87342e-05	9.68354e-05	1.93671e-05	0	0.000154937	0.000968354	0	5.81013e-05	0.00149127	5.81013e-05	0.000348608	0.000174304	0.000232405	0.000213038	9.68354e-05	0.000522911	1.93671e-05	0.00013557
20157418	0	1.09005e-05	1.09005e-05	0	0.000185308	3.27015e-05	0	0	0	0	3.27015e-05	0	0	3.27015e-05	0.000152607	0.000272512	7.63034e-05	0.000163507	9.81044e-05	4.3602e-05	3.27015e-05	2.1801e-05	0.0044801	0.00852418	0.0045346	1.09005e-05	2.1801e-05	5.45024e-05	5.45024e-05	1.09005e-05	5.45024e-05	4.3602e-05	0	0	1.09005e-05	8.72039e-05	0.000512323	2.1801e-05	1.09005e-05	0.000196209	2.1801e-05	0.000141706	0.000141706	0.000152607	0.00022891	2.1801e-05	7.63034e-05	5.45024e-05	0.000119905
20157425	0	0	0	0	0.000174892	0.000104935	3.49785e-05	5.24677e-05	1.74892e-05	0.000104935	0	0	0	5.24677e-05	0.00022736	8.74462e-05	1.74892e-05	8.74462e-05	3.49785e-05	1.74892e-05	0.000104935	1.74892e-05	0.00253594	0.00886705	0.00440729	0	0	5.24677e-05	0.000122425	5.24677e-05	5.24677e-05	1.74892e-05	1.74892e-05	3.49785e-05	0	0.000122425	0.000559656	0	0	0.000209871	5.24677e-05	0.000349785	0.000279828	0.000139914	0.000209871	5.24677e-05	0.000209871	5.24677e-05	0.000104935
20157431	0	0	0	2.36289e-05	0.000236289	0.000141774	0	0	0	0.000165403	0	0	0	0.000118145	0.00044895	0.000283547	2.36289e-05	9.45157e-05	9.45157e-05	0	0.000165403	2.36289e-05	0.000685239	0.00541103	0.00328442	4.72579e-05	4.72579e-05	2.36289e-05	4.72579e-05	0.000118145	4.72579e-05	4.72579e-05	2.36289e-05	2.36289e-05	0	0.000141774	0.000779755	0	2.36289e-05	0.000425321	0.000141774	0.000425321	0.000330805	0.00108693	0.000472579	4.72579e-05	0.000165403	9.45157e-05	0.000732497
20157437	0	0	0	0	0.000240096	0	0	0	0	0.000120048	0.000120048	0	0	0	0.000960384	0.000360144	0	0.000120048	0.000120048	0	0.000240096	0.000120048	0.00648259	0.00672269	0.00396158	0	0.000720288	0	0.000240096	0	0.000120048	0	0.000360144	0	0	0	0.000840336	0	0	0.000360144	0.000120048	0.000360144	0.000360144	0	0.000240096	0	0	0	0.000120048
20157450	0	0	6.57397e-05	0	0.000312264	6.57397e-05	0	1.64349e-05	0	8.21747e-05	3.28699e-05	0	1.64349e-05	0.000131479	0.000115045	0.000180784	3.28699e-05	0.000262959	0.000131479	3.28699e-05	0.000164349	0.000115045	0.00215298	0.00433882	0.00361569	1.64349e-05	3.28699e-05	3.28699e-05	4.93048e-05	1.64349e-05	0	8.21747e-05	9.86096e-05	1.64349e-05	0	0.000328699	0.00128192	1.64349e-05	9.86096e-05	0.000295829	0.000542353	0.000443743	0.000558788	0.000936791	0.000328699	0.000164349	0.000378003	0.000164349	0.00138053
20157456	0	0	0	0	8.4832e-05	1.69664e-05	0	8.4832e-06	8.4832e-06	1.69664e-05	0	0	0	2.54496e-05	0.000101798	0.000118765	1.69664e-05	0.000101798	2.54496e-05	1.69664e-05	0.000101798	3.39328e-05	0.00267221	0.00707499	0.00510689	5.08992e-05	4.2416e-05	5.08992e-05	5.93824e-05	5.93824e-05	2.54496e-05	8.4832e-05	3.39328e-05	6.78656e-05	0	0.000229046	0.000576858	8.4832e-06	8.4832e-06	0.000432643	2.54496e-05	7.63488e-05	8.4832e-05	0.000161181	0.000110282	3.39328e-05	0.000127248	7.63488e-05	8.4832e-05
20157463	0	0	1.85799e-05	9.28997e-06	0.000287989	4.64498e-05	9.28997e-06	2.78699e-05	1.85799e-05	4.64498e-05	9.28997e-06	0	0	0.00013935	0.000297279	0.000232249	0.00012077	0.000157929	0.00013935	9.28997e-05	0.000297279	5.57398e-05	0.00126344	0.00517451	0.00498871	4.64498e-05	6.50298e-05	0.00013006	0.000250829	6.50298e-05	2.78699e-05	9.28997e-05	5.57398e-05	0.000148639	0	0.000362309	0.000947577	7.43197e-05	9.28997e-05	0.000817517	0.000455208	0.00134705	0.0035209	0.0379031	0.00190444	0.00575978	0.0019416	0.000455208	0.00193231
20157469	0	6.6811e-06	4.00866e-05	0	0.000320693	4.00866e-05	0	1.33622e-05	2.67244e-05	2.00433e-05	8.68543e-05	0	6.6811e-06	0.000133622	0.000307331	8.68543e-05	0.000320693	8.68543e-05	8.01732e-05	3.34055e-05	8.01732e-05	1.33622e-05	0.0013095	0.00500414	0.00376814	2.67244e-05	2.00433e-05	1.33622e-05	8.68543e-05	1.33622e-05	4.67677e-05	6.6811e-05	0.000140303	3.34055e-05	0	0.00012026	0.00132954	6.6811e-06	4.00866e-05	0.000233838	0.00012026	0.000815094	0.000334055	0.000440952	0.00018039	9.35354e-05	0.000287287	0.000126941	0.00678131
20157475	0	2.35905e-05	4.71809e-05	0	0.000353857	0.000471809	0	9.43619e-05	0	0	2.35905e-05	0	0	9.43619e-05	0.000188724	9.43619e-05	2.35905e-05	2.35905e-05	0.000165133	4.71809e-05	0.000188724	4.71809e-05	0.00681765	0.00901156	0.00507195	2.35905e-05	4.71809e-05	4.71809e-05	0.000141543	2.35905e-05	0	4.71809e-05	4.71809e-05	0	0	0.000165133	0.000306676	0	2.35905e-05	0.000330267	7.07714e-05	0.000235905	0.000188724	0.000188724	4.71809e-05	4.71809e-05	4.71809e-05	7.07714e-05	0.000235905
20157494	0	3.74953e-05	3.74953e-05	0	0.000187477	3.74953e-05	0	0	3.74953e-05	0	0	0	0	7.49906e-05	0.000374953	0.000262467	3.74953e-05	0.000187477	0.000187477	0	0.000187477	0	0.00472441	0.00648669	0.00352456	0	3.74953e-05	3.74953e-05	0.000149981	7.49906e-05	3.74953e-05	3.74953e-05	0.000187477	3.74953e-05	0	7.49906e-05	0.000487439	0	0	0.000412448	0.000112486	0.000712411	0.000374953	0.00138733	0.000449944	0.000149981	0.000524934	0.000112486	0.000224972
20157499	0	1.14416e-05	2.86041e-05	0	0.000434783	2.28833e-05	5.72082e-06	4.57666e-05	1.14416e-05	2.28833e-05	2.28833e-05	5.72082e-06	0	0.000120137	0.000108696	0.000188787	1.14416e-05	9.15332e-05	8.00915e-05	6.29291e-05	0.000114416	2.28833e-05	0.00340961	0.00743707	0.00601259	0.000108696	7.43707e-05	0.000131579	0.000131579	9.15332e-05	4.00458e-05	5.72082e-05	6.29291e-05	4.00458e-05	2.28833e-05	0.000217391	0.00069222	3.43249e-05	2.86041e-05	0.000240275	0.000125858	0.000257437	0.000411899	0.000160183	0.000200229	5.14874e-05	0.000234554	5.72082e-05	0.000177346
20157875	1.47363e-05	0	0	0	3.68408e-05	0	0	7.36817e-06	0	0	0	7.36817e-06	0	2.94727e-05	0.000132627	2.94727e-05	0	1.47363e-05	7.36817e-06	0	7.36817e-06	7.36817e-06	0.000486299	0.000891548	0.000412617	7.36817e-06	7.36817e-06	0	2.94727e-05	0	7.36817e-06	2.21045e-05	0	0	0	1.47363e-05	0.000110522	7.36817e-06	9.57861e-05	0.000582085	0	7.36817e-06	1.47363e-05	2.21045e-05	7.36817e-06	7.36817e-06	0	7.36817e-06	0
20158212	0	0	5.46732e-05	0.000246029	0.00585003	0.000437386	2.73366e-05	0.000136683	5.46732e-05	0.00123015	0.000191356	0.000218693	0	0.000328039	0.000437386	0.00166753	0.000136683	0.000410049	0.000492059	0.000656078	0.000300703	0.000218693	0.000136683	0.0011208	0.000382712	0.000218693	0.000492059	0.0016402	0.00153085	0.000273366	0.000464722	0.0103606	0.000546732	0.000328039	0	0.0011208	0.000710751	2.73366e-05	0.000218693	0.000546732	0.000191356	2.73366e-05	5.46732e-05	0	0.000300703	0	0.00016402	0.000136683	2.73366e-05
20158214	0	0	9.53956e-05	3.17985e-05	0.00623251	0.00022259	0	0.000317985	0	0.00111295	0.000190791	0.0020987	0	0.000286187	0.000127194	0.00143093	0.000158993	0.000445179	0.00022259	9.53956e-05	0.000254388	3.17985e-05	0.000158993	0.00114475	0.000317985	0.00162172	0.00238489	0.00260748	0.0187929	0.00152633	0.000445179	0.00317985	0.0021941	0.00193971	0	0.00511956	0.00108115	0	0.000254388	0.000890359	9.53956e-05	9.53956e-05	6.3597e-05	3.17985e-05	0.000158993	0	0.000158993	3.17985e-05	6.3597e-05
20158221	2.89302e-05	0	0.000708789	0.000477348	0.0502806	0.000723254	4.33952e-05	0.000318232	0.000245906	0.0115431	0.000723254	0.00101256	0	0.000115721	0.000245906	0.000202511	0	0.000144651	0.000115721	0.000289302	0.000159116	0.000144651	0.00111381	0.00166348	0.000694324	0.000173581	0.000260371	0.000636464	0.000679859	0.000405022	0.000231441	0.000303767	0.000405022	0.000245906	0	0.000752184	0.000361627	0	8.67905e-05	0.000564138	7.23254e-05	0.000130186	0.000202511	1.44651e-05	0.000159116	1.44651e-05	8.67905e-05	0.000101256	2.89302e-05
20158229	0	0	0.000118092	0	0.00177137	0.000118092	0	0	0.000236183	0.000354275	5.90458e-05	5.90458e-05	0	0.000944733	0.00200756	0.00643599	5.90458e-05	0.000649504	0.00177137	0.00135805	0.00118092	0.000590458	0.000177137	0.00330657	0.000767596	0.000236183	0.00100378	0.00159424	0.00324752	0.000354275	0.000413321	0.0783538	0.00366084	0.000826641	0	0.00312943	0.0014171	0.000236183	0.00070855	0.00106282	0	0.000177137	0.000236183	5.90458e-05	0.000177137	5.90458e-05	0.000295229	0	0.000118092
20158240	0	0	0.000190687	0.000114412	0.0289844	0.000343236	3.81374e-05	0.000152549	3.81374e-05	0.00453835	0.000343236	0.00110598	0	0.000190687	0.000419511	0.000343236	3.81374e-05	0.000228824	0.000266962	0.000114412	0.000305099	0.000190687	0.000419511	0.00175432	0.000572061	0.000533923	0.000381374	0.000381374	0.000610198	7.62747e-05	0.000190687	0.000572061	0.000152549	0.000190687	0	0.000800885	0.000991572	3.81374e-05	0.000152549	0.000991572	0.000419511	0.00106785	0.000381374	3.81374e-05	0.000305099	0	0.000648335	0.000381374	3.81374e-05
20158247	5.27102e-05	0	0.000281121	0.00147589	0.0178863	0.000843363	7.02802e-05	0.000562242	7.02802e-05	0.00588597	0.000368971	0.000737943	0	0.000316261	0.000825793	0.000720372	7.02802e-05	0.000158131	0.000333831	0.000562242	0.000544672	0.000175701	0.000474392	0.00154617	0.000579812	5.27102e-05	0.00014056	0.000298691	0.000860933	5.27102e-05	0.000351401	0.00131775	0.000228411	0.000158131	0	0.000896073	0.00115962	0	5.27102e-05	0.000667662	0.000316261	0.000210841	0.000404111	8.78503e-05	0.000351401	7.02802e-05	0.000404111	0.00010542	8.78503e-05
20158251	0.000117862	0	0.000117862	0.000147327	0.00689493	0.000176793	0	0.000176793	2.94655e-05	0.00100183	0.000176793	0.000176793	0	0.000825034	0.000235724	0.00209205	0.000117862	0.000294655	0.000648241	0.000530379	0.000235724	0.000265189	0.000117862	0.00197419	0.000648241	0.00091343	0.00203312	0.00232777	0.00695386	0.00117862	0.000707172	0.0059815	0.00209205	0.00153221	2.94655e-05	0.00447876	0.00150274	2.94655e-05	0.000353586	0.000677706	0.000117862	0.000265189	0.000206258	2.94655e-05	8.83965e-05	2.94655e-05	0.000206258	0.000117862	2.94655e-05
20158254	1.11443e-05	0	0.00232543	0.000713232	0.014937	0.00059436	6.68655e-05	0.000334328	0.000560927	0.00378905	0.00120729	0.000475488	3.71475e-06	0.000211741	0.000319469	0.00123701	7.05803e-05	0.000204311	0.000182023	8.9154e-05	0.000122587	5.20065e-05	0.000397478	0.00140046	0.000460629	0.000163449	0.000133731	0.000549783	0.000609219	0.000182023	0.000252603	0.000620364	0.000200597	0.0002266	3.71475e-06	0.000850678	0.000408623	2.60033e-05	5.9436e-05	0.000490347	7.80098e-05	7.05803e-05	0.000293465	4.82918e-05	0.000222885	4.08623e-05	0.000163449	6.31508e-05	3.34328e-05
20158258	0	0	0.000186279	7.98339e-05	0.0100059	0.000239502	0	0.000319336	5.32226e-05	0.00279419	0.000106445	0.00103784	0	0.000239502	0.00039917	0.000585449	0.000133057	0.000212891	0.000319336	0.000319336	0.000558838	0.000266113	0.000319336	0.00252807	0.00101123	5.32226e-05	0.000292724	0.00111768	0.000532226	7.98339e-05	0.000372558	0.00167651	0.000292724	0.000425781	2.66113e-05	0.00127734	0.00114429	5.32226e-05	0.000133057	0.0014104	7.98339e-05	0.00039917	0.000505615	7.98339e-05	0.000558838	0.000133057	0.000479004	0.000159668	0.000212891
20158265	0	4.36605e-05	4.36605e-05	0	0.00318722	0.000174642	4.36605e-05	0.000261963	0	0.000349284	0.000523926	0.000305623	0	0	0.000174642	0.00109151	4.36605e-05	4.36605e-05	0.000436605	4.36605e-05	4.36605e-05	4.36605e-05	4.36605e-05	0.00117883	0.000305623	0.000654907	0.00126615	0.00275061	0.0037548	0.000261963	0.000305623	0.0020957	0.000654907	0.00157178	0	0.00323088	0.00135348	0	0	0.000960531	8.7321e-05	8.7321e-05	0	0	0	0	0.000611247	4.36605e-05	0
20158269	0	0	0.000372578	0.000124193	0.00819672	0.000496771	6.20964e-05	0.000248385	0	0.00204918	0.000248385	0.000248385	0	0.000310482	0.000310482	0.000434675	0	0.000186289	0.000186289	6.20964e-05	0.000186289	0	0.000310482	0.000558867	0.000558867	0.00068306	0.000869349	0.000372578	0.00155241	0.000248385	0.000124193	0.00223547	0.000186289	0.000124193	0	0.00105564	0.000993542	0	0.000186289	0.00068306	0	0.000124193	0.000310482	0	0.000248385	0	0.000124193	0	0
20158276	0	0	0.000300765	0.00060153	0.121251	0.00047263	4.29664e-05	0.000386698	8.59328e-05	0.0267681	0.000644496	0.000515597	0	0.000816362	0.000343731	0.00116009	0	0.000300765	0.000300765	4.29664e-05	0.000343731	4.29664e-05	0.000128899	0.00184756	0.00193349	0.000300765	0.00047263	0.00141789	0.000386698	4.29664e-05	0.00047263	0.000300765	0.000429664	0.000128899	0	0.000730429	0.00120306	0	0.000300765	0.000515597	0.000429664	0.000257798	0.000128899	4.29664e-05	0.000257798	0	0.000171866	4.29664e-05	4.29664e-05
20158283	0	0	0.00103667	0.000808415	0.0172811	0.000589668	5.70646e-05	0.000456517	0.000408963	0.00267253	0.00099863	0.000475538	0	0.00012364	0.000237769	0.00024728	2.85323e-05	7.60861e-05	0.000180705	8.55969e-05	0.000218748	0.00012364	0.000180705	0.000798904	0.000427984	0.000161683	0.000142661	0.000608689	0.000437495	0.000199726	0.000209237	0.000304345	0.000199726	0.000218748	0	0.000627711	0.000589668	9.51077e-06	0.000114129	0.000675264	2.85323e-05	0.000104618	0.000104618	0.000104618	0.000237769	2.85323e-05	0.000180705	6.65754e-05	3.80431e-05
20158287	0	0	0.000211989	2.35544e-05	0.0056766	0.000423978	2.35544e-05	0.000353315	7.06631e-05	0.000942174	0.000471087	0.000588859	0	9.42174e-05	0.00016488	0.00016488	2.35544e-05	0.000117772	7.06631e-05	7.06631e-05	0.00016488	0.000259098	0.00016488	0.00138971	0.000353315	7.06631e-05	0.000329761	0.000353315	0.000494641	4.71087e-05	0.000353315	0.000447533	4.71087e-05	0.000400424	4.71087e-05	0.00122483	0.00153103	0	0.000259098	0.000753739	2.35544e-05	0.00016488	0.000141326	4.71087e-05	0.000141326	0	0.000117772	2.35544e-05	2.35544e-05
20158291	0	0	0.000311751	3.89689e-05	0.00298112	0.000272782	0	0.000272782	5.84533e-05	0.000448142	0.000370204	0.000253298	0	3.89689e-05	0.000136391	0.000448142	1.94844e-05	0.000136391	0.000116907	5.84533e-05	9.74222e-05	3.89689e-05	0.000272782	0.00116907	0.000545564	0.000487111	0.00035072	0.000798862	0.00171463	0.00017536	0.000311751	0.000798862	9.74222e-05	0.000720924	0	0.00111061	0.001247	0	7.79378e-05	0.001247	0	9.74222e-05	7.79378e-05	5.84533e-05	9.74222e-05	5.84533e-05	3.89689e-05	7.79378e-05	1.94844e-05
20158299	2.9846e-05	0	0.000189025	4.97433e-05	0.0092821	0.000646663	1.98973e-05	0.000278563	0.000119384	0.000726253	0.000198973	0.000507382	9.94866e-06	0.000318357	0.000129333	0.000616817	5.9692e-05	0.000119384	0.000258665	0.000169127	0.000278563	5.9692e-05	0.000218871	0.00123363	0.000427793	0.000616817	0.000726253	0.00102471	0.00168132	0.000487485	0.000358152	0.00165148	0.000706355	0.00141271	9.94866e-06	0.00248717	0.000845637	2.9846e-05	0.000378049	0.000955072	0.000179076	0.000139281	0.000198973	2.9846e-05	0.000189025	2.9846e-05	0.000119384	0.00014923	9.94866e-06
20158616	1.47373e-05	0	4.42119e-05	0	0.00054528	8.84238e-05	1.47373e-05	1.47373e-05	2.94746e-05	5.89492e-05	5.89492e-05	0	1.47373e-05	7.36865e-05	0.000147373	4.42119e-05	1.47373e-05	8.84238e-05	5.89492e-05	1.47373e-05	0.000103161	2.94746e-05	0.00123793	0.00381696	0.00101687	1.47373e-05	0	0	5.89492e-05	2.94746e-05	2.94746e-05	5.89492e-05	4.42119e-05	1.47373e-05	0	0.00016211	0.000309483	1.47373e-05	1.47373e-05	0.000250534	2.94746e-05	2.94746e-05	0.000117898	0.000103161	0.000147373	1.47373e-05	8.84238e-05	0.000309483	0
20158619	1.2417e-05	2.48339e-05	3.72509e-05	0	0.000496678	0.00012417	1.2417e-05	0.000111753	2.48339e-05	3.72509e-05	2.48339e-05	0	2.48339e-05	8.69187e-05	0.00069535	0.000248339	0.000707767	0.000136587	0.000136587	3.72509e-05	0.000223505	4.96678e-05	0.00151487	0.00383684	0.0012417	7.45018e-05	0.000248339	0.000260756	0.000161421	3.72509e-05	0.000235922	0.000335258	0.000149004	0.000136587	2.48339e-05	0.000310424	0.000248339	2.48339e-05	7.45018e-05	0.000583597	3.72509e-05	7.45018e-05	7.45018e-05	0.000111753	0.000273173	2.48339e-05	8.69187e-05	0.000198671	0.000149004
20158628	6.26347e-06	4.38443e-05	4.38443e-05	0	0.000425916	3.75808e-05	0	6.26347e-05	3.13173e-05	7.51616e-05	3.75808e-05	0	0	0.000137796	0.000288119	8.14251e-05	0.000100215	7.51616e-05	8.76885e-05	4.38443e-05	0.000125269	1.87904e-05	0.00121511	0.00355765	0.000851831	6.26347e-06	1.25269e-05	5.63712e-05	6.26347e-05	1.87904e-05	4.38443e-05	6.88981e-05	1.87904e-05	3.13173e-05	0	6.88981e-05	0.000250539	2.50539e-05	3.75808e-05	0.000526131	8.14251e-05	5.01077e-05	0.00016285	1.87904e-05	0.000175377	3.75808e-05	6.88981e-05	0.00016285	1.25269e-05
20158638	1.30489e-05	3.00124e-05	5.48053e-05	2.60978e-06	0.00017616	6.26346e-05	2.60978e-06	3.91467e-05	6.52444e-06	3.5232e-05	2.21831e-05	2.60978e-06	3.91467e-06	2.87075e-05	0.000190514	5.872e-05	8.48178e-05	7.56835e-05	6.65493e-05	3.65369e-05	2.3488e-05	7.56835e-05	0.00438443	0.00901156	0.000867751	4.95858e-05	3.39271e-05	3.39271e-05	6.39395e-05	4.17564e-05	2.60978e-05	8.48178e-05	2.21831e-05	2.47929e-05	1.30489e-06	5.61102e-05	0.000150062	3.91467e-06	2.60978e-05	0.000197038	1.56587e-05	6.26346e-05	0.000101781	3.91467e-05	0.000103086	3.26222e-05	7.0464e-05	3.5232e-05	9.13422e-06
20158647	4.93155e-06	1.47947e-05	2.2192e-05	2.46578e-06	0.000199728	2.46578e-05	2.95893e-05	8.87679e-05	2.46578e-05	2.2192e-05	1.97262e-05	7.39733e-06	1.23289e-05	5.17813e-05	0.000327948	0.000152878	0.000549868	6.41102e-05	0.000219454	1.47947e-05	6.41102e-05	6.41102e-05	0.0013907	0.00471949	0.0016718	3.45209e-05	4.19182e-05	7.39733e-05	9.36995e-05	1.97262e-05	5.91786e-05	7.15075e-05	0.000106028	3.45209e-05	0	7.6439e-05	0.00143755	1.47947e-05	7.39733e-05	0.000249043	9.8631e-06	0.000143015	0.000152878	9.61652e-05	0.000160275	4.19182e-05	8.13706e-05	0.000103563	2.95893e-05
20158657	0	6.33276e-06	4.43293e-05	0	0.000658607	2.5331e-05	0	7.59931e-05	6.33276e-06	6.96604e-05	5.69949e-05	1.26655e-05	6.33276e-06	5.69949e-05	0.000221647	6.96604e-05	7.59931e-05	5.69949e-05	8.23259e-05	5.69949e-05	5.69949e-05	5.69949e-05	0.000797928	0.00274842	0.000652274	3.79966e-05	1.89983e-05	5.06621e-05	0.000164652	3.16638e-05	2.5331e-05	6.33276e-05	3.79966e-05	2.5331e-05	0	0.000101324	0.000202648	6.33276e-06	3.79966e-05	0.000202648	4.43293e-05	6.96604e-05	0.000139321	3.79966e-05	8.86587e-05	1.89983e-05	8.23259e-05	3.79966e-05	0
20158666	4.0996e-06	3.48466e-05	7.37929e-05	0	0.00020498	0.000120938	1.63984e-05	6.35439e-05	2.66474e-05	3.68964e-05	3.68964e-05	2.0498e-06	2.0498e-05	0.00010454	0.000701032	0.00010454	0.000180383	0.000143486	0.000125038	2.0498e-05	8.40419e-05	0.000120938	0.0015558	0.0097837	0.00131392	0.000133237	3.48466e-05	6.55937e-05	6.76435e-05	4.30458e-05	5.1245e-05	0.000131187	6.96933e-05	6.14941e-05	4.0996e-06	0.000129138	0.000332068	4.71454e-05	9.22411e-05	0.000545247	3.48466e-05	0.000174233	0.000147586	0.000131187	0.000188582	4.50956e-05	0.00010864	6.35439e-05	2.86972e-05
20158685	1.13082e-05	1.13082e-05	4.03865e-05	1.61546e-06	0.00161061	3.06937e-05	9.69276e-06	7.43111e-05	6.46184e-06	3.55401e-05	2.1001e-05	8.0773e-06	9.69276e-06	4.36174e-05	0.000250396	7.91575e-05	0.00017447	0.000116313	0.000105005	2.74628e-05	3.06937e-05	5.65411e-05	0.00176247	0.00418566	0.000941813	8.40039e-05	2.58473e-05	7.43111e-05	4.68483e-05	3.06937e-05	8.23884e-05	8.56193e-05	2.74628e-05	3.8771e-05	8.0773e-06	5.65411e-05	0.0003344	2.42319e-05	2.58473e-05	0.000242319	3.71556e-05	4.03865e-05	8.72348e-05	6.46184e-05	0.0001567	2.42319e-05	8.72348e-05	5.9772e-05	1.45391e-05
20158695	0	0	0.000116168	0	0.000174251	2.90419e-05	0	0	0	0	0	0	0	0.000116168	0.000174251	0	2.90419e-05	2.90419e-05	0	2.90419e-05	0	2.90419e-05	0.00060988	0.0027009	0.000551796	2.90419e-05	0	0	0	0	0	0	0	2.90419e-05	0	0	0.000203293	0	2.90419e-05	0.00014521	2.90419e-05	8.71257e-05	0.000203293	0	0.000116168	0	2.90419e-05	2.90419e-05	0
20158699	1.23743e-05	3.40293e-05	2.78421e-05	0	0.000566124	9.28071e-06	2.47486e-05	4.02164e-05	9.28071e-06	7.42457e-05	6.18714e-05	1.85614e-05	3.09357e-06	0.000136117	0.000201082	9.59007e-05	6.4965e-05	9.28071e-05	0.000120649	1.23743e-05	5.87779e-05	3.40293e-05	0.000884761	0.00177571	0.000646556	7.11521e-05	2.47486e-05	8.662e-05	6.80586e-05	2.1655e-05	3.40293e-05	3.09357e-05	2.78421e-05	4.64036e-05	0	0.000188708	0.000256766	6.18714e-06	9.28071e-06	0.000182521	5.25907e-05	0.000108275	0.000145398	4.02164e-05	4.64036e-05	1.85614e-05	5.25907e-05	5.56843e-05	1.23743e-05
20191544	7.10975e-05	0.000110201	1.77744e-05	1.77744e-05	0.000124421	0	7.10975e-06	3.91036e-05	0	3.55487e-05	3.55487e-06	0	0.000110201	3.55487e-06	2.8439e-05	3.55487e-06	0	3.55487e-06	0	3.55487e-06	0	0	0.000113756	0.000348378	5.6878e-05	0	0	3.55487e-06	3.55487e-06	0	0	3.55487e-06	0	2.48841e-05	0	3.55487e-06	1.77744e-05	0	3.91036e-05	2.13292e-05	0	3.55487e-06	1.42195e-05	0	3.55487e-06	0	0	0	0
20198149	0	0	0	0	0	0	0	8.80359e-05	0	0	0	0	0.00044018	0	0.000176072	0	0	0	0	0	0	0	8.80359e-05	0.000352144	0.000264108	0	0	0	0	0	0	0	0	0	0	0	0	0	0.00044018	0.000352144	0	0	0.000176072	0	0	0	0	0	0
20221610	4.36043e-05	1.09011e-05	0.00163516	2.18022e-05	0.000621362	0.00114461	3.27033e-05	0.000730373	3.27033e-05	0.000141714	0.000719472	4.36043e-05	0	5.45054e-05	0.000185318	0.000283428	4.36043e-05	0.000163516	0.000207121	2.18022e-05	4.36043e-05	0.00019622	0.000272527	0.000534153	0.000218022	0.000130813	0.000163516	0.00122092	0.000250725	0.000185318	0.000937493	0.00019622	0.0010029	0.000359736	0	0.00137354	0.000228923	2.18022e-05	0	0.00117732	1.09011e-05	2.18022e-05	3.27033e-05	5.45054e-05	5.45054e-05	2.18022e-05	4.36043e-05	1.09011e-05	2.18022e-05
20221616	0	0	0.00116758	2.20298e-05	0.0010354	0.00411958	0.000176239	0.000484656	0.000110149	0.000550746	0.00326041	0.000110149	0	6.60895e-05	0.000484656	0.000242328	4.40597e-05	4.40597e-05	0.000110149	2.20298e-05	2.20298e-05	2.20298e-05	0.000242328	0.000771044	0.000330447	0.000506686	0.000330447	0.000704955	0.000462626	0.000352477	0.00279779	0.000440597	0.000220298	0.000352477	0	0.00138788	0.000220298	4.40597e-05	4.40597e-05	0.000132179	2.20298e-05	0	0.000176239	6.60895e-05	0.000286388	0	2.20298e-05	0.000132179	0
20221622	0	1.59533e-05	0.000813618	0	0.000733851	0.00154747	1.59533e-05	0.000271206	4.78599e-05	7.97664e-05	0.000989104	0	0	4.78599e-05	7.97664e-05	0.000542412	0	7.97664e-05	0.000207393	1.59533e-05	4.78599e-05	9.57197e-05	0.000175486	0.000733851	0.000239299	4.78599e-05	0.000111673	0.00114864	0.000255253	6.38132e-05	0.00205797	6.38132e-05	7.97664e-05	0.000207393	1.59533e-05	0.000765758	0.000622178	1.59533e-05	1.59533e-05	0.00014358	0	1.59533e-05	6.38132e-05	1.59533e-05	7.97664e-05	0	4.78599e-05	1.59533e-05	1.59533e-05
20221627	0	0	0.00239894	0.000188893	0.000623347	0.00404231	0.000151114	0.00026445	0.000226672	0.000245561	0.000132225	1.88893e-05	0	1.88893e-05	7.55572e-05	0.000207782	3.77786e-05	3.77786e-05	0.000132225	0	1.88893e-05	1.88893e-05	0.00026445	0.000963355	0.00160559	5.66679e-05	3.77786e-05	0.000472233	0.000151114	0	0.000868908	7.55572e-05	5.66679e-05	0.000113336	0	0.000396675	0.000377786	0	0	0.000207782	3.77786e-05	0.000132225	5.66679e-05	0	0.000113336	3.77786e-05	0	5.66679e-05	1.88893e-05
20221633	3.62838e-05	0	0.0149399	2.72129e-05	0.0033109	0.0358938	0.000371909	0.000879882	0.000462619	0.000789173	0.000898024	0.000154206	0	2.72129e-05	0.000172348	0.000117922	3.62838e-05	5.44257e-05	0.000154206	2.72129e-05	6.34967e-05	4.53548e-05	0.00157835	0.00109759	0.000426335	4.53548e-05	7.25676e-05	0.000453548	0.000507973	5.44257e-05	0.000653109	7.25676e-05	9.97805e-05	0.00019049	2.72129e-05	0.000335625	0.000117922	1.81419e-05	1.81419e-05	0.000208632	4.53548e-05	5.44257e-05	8.16386e-05	3.62838e-05	7.25676e-05	1.81419e-05	1.81419e-05	2.72129e-05	9.07095e-06
20221639	5.22589e-05	5.22589e-05	0.00219487	0	0.00135873	0.00305715	0.000418071	0.000365812	0.000182906	0.000365812	0.00109744	2.61294e-05	0	5.22589e-05	5.22589e-05	0.000182906	0	2.61294e-05	2.61294e-05	5.22589e-05	2.61294e-05	0	7.83883e-05	0.000966789	0.00047033	5.22589e-05	0.000339683	0.000365812	0.000156777	0.000104518	0.000574848	7.83883e-05	2.61294e-05	0.000261294	0	0.000391942	0.000444201	0	2.61294e-05	0.000313553	7.83883e-05	2.61294e-05	0.000104518	0	7.83883e-05	0	0	2.61294e-05	0
20221644	5.25394e-05	0	0.0128371	8.75657e-05	0.0025394	0.0235727	0.000367776	0.00084063	0.000577933	0.000525394	0.000630473	3.50263e-05	0	3.50263e-05	0.000192644	7.00525e-05	3.50263e-05	7.00525e-05	5.25394e-05	0	3.50263e-05	0	0.00033275	0.00108581	0.000595447	0	8.75657e-05	0.000227671	0.000175131	5.25394e-05	0.000472855	8.75657e-05	1.75131e-05	0.000105079	0	0.000700525	0.000315236	0	1.75131e-05	0.000245184	1.75131e-05	0.000105079	7.00525e-05	0	8.75657e-05	1.75131e-05	1.75131e-05	1.75131e-05	1.75131e-05
20221650	2.40392e-05	8.01308e-06	0.00225167	4.80785e-05	0.00681913	0.0108257	0.000296484	0.00093753	0.000496811	0.0015305	0.0152168	5.60915e-05	0	4.80785e-05	0.00041668	0.000216353	4.00654e-05	0.000152248	0.000136222	1.60262e-05	8.81439e-05	8.81439e-05	0.000633033	0.00151447	0.000721177	4.80785e-05	0.000288471	0.00072919	0.000232379	9.61569e-05	0.00132216	0.000240392	0.000160262	0.000184301	1.60262e-05	0.000777269	0.000280458	1.60262e-05	3.20523e-05	0.000336549	3.20523e-05	0.000112183	0.000192314	0.000152248	0.000128209	8.01308e-06	6.41046e-05	8.01308e-05	8.01308e-06
20221655	1.13532e-05	0	0.00703898	5.67659e-05	0.0017938	0.0184035	0.000113532	0.000669838	0.000567659	0.000840136	0.000692544	3.40596e-05	0	5.67659e-05	0.000181651	0.000124885	0	4.54127e-05	0.000113532	3.40596e-05	2.27064e-05	4.54127e-05	0.00110126	0.00150997	0.000431421	3.40596e-05	5.67659e-05	0.000295183	0.000147591	0.000147591	0.000442774	5.67659e-05	0.000113532	0.000238417	0	0.000431421	0.000397362	0	2.27064e-05	0.000340596	0	0	0.000124885	5.67659e-05	7.94723e-05	1.13532e-05	3.40596e-05	4.54127e-05	2.27064e-05
20221667	0.00014126	0	0.00157152	4.41439e-05	0.00241908	0.0210919	0.00119188	0.00186287	0.000821076	0.000309007	0.000220719	7.9459e-05	0	8.82877e-05	0.000556213	0.000176575	3.53151e-05	6.18014e-05	8.82877e-05	2.64863e-05	7.06302e-05	6.18014e-05	0.000238377	0.00103297	0.000494411	2.64863e-05	6.18014e-05	0.000494411	0.000185404	5.29726e-05	0.000688644	4.41439e-05	0.00014126	0.000150089	0	0.000441439	0.000264863	0	0	0.000326665	8.82877e-06	7.06302e-05	0.000150089	0.000105945	6.18014e-05	3.53151e-05	6.18014e-05	4.41439e-05	8.82877e-06
20221687	0	0	0.00742213	5.84419e-05	0.00280521	0.135878	0.00029221	0.00105195	0.00216235	0.000759745	0.000818187	0	0	0	0	5.84419e-05	0	0	5.84419e-05	0	0	0	0.000175326	0.000759745	0.00029221	0	0.000116884	0.000467536	0.000175326	0	0.000233768	0.000116884	5.84419e-05	0.000350652	0	0.00122728	0.000116884	0	0	0.000233768	0	0.000233768	0.000175326	0	0.000584419	0	0	0	0
20221694	2.50319e-05	0	0.00165211	0	0.000550702	0.00335428	7.50957e-05	0.000275351	0.000150191	7.50957e-05	0.000350447	0	0	0.000100128	0.000100128	0.000976245	2.50319e-05	0.000100128	0.000250319	2.50319e-05	5.00638e-05	2.50319e-05	2.50319e-05	0.000851085	0.000926181	7.50957e-05	0.000175223	0.00140179	0.000200255	5.00638e-05	0.00170217	0.000425543	0.000400511	0.000325415	0	0.00052567	0.000250319	2.50319e-05	0	0.000400511	0	0	0.000100128	0	0.000300383	5.00638e-05	2.50319e-05	0	2.50319e-05
20221699	5.43427e-05	0	0.00623287	2.36273e-06	0.00204139	0.00946272	0.000189018	0.000609583	0.000481996	0.000189018	0.000406389	8.97836e-05	0	6.61563e-05	0.000120499	0.00012995	2.83527e-05	5.43427e-05	0.000137038	2.36273e-05	7.56072e-05	2.12645e-05	0.000902561	0.00113883	0.00036386	9.4509e-05	0.000172479	0.000595407	0.000302429	9.92345e-05	0.00109394	0.00015594	0.000243361	0.000222096	9.4509e-06	0.000652112	0.000451281	9.4509e-06	2.36273e-05	0.000290615	3.07154e-05	0.000108685	0.00012995	1.65391e-05	6.37936e-05	7.08818e-06	4.48918e-05	2.12645e-05	4.72545e-06
20222420	0	0	0.000467683	4.67683e-05	0.000327378	0.000233842	0.00289964	0.000982135	0.00205781	0.000140305	4.67683e-05	0	0	0	0	4.67683e-05	0	0	0	0	0	0	0.00028061	0.000187073	0.000187073	0	0	9.35366e-05	0	4.67683e-05	0.000140305	9.35366e-05	0	9.35366e-05	0	4.67683e-05	4.67683e-05	0	0	0.000187073	0	0.000140305	4.67683e-05	0	4.67683e-05	0	0	0.000140305	0
20222422	7.7818e-05	0	0.00105054	0	0.00105054	0.00459126	0.00151745	0.00147854	0.00077818	0.000194545	7.7818e-05	0	0	0	3.8909e-05	3.8909e-05	3.8909e-05	0	0	0	3.8909e-05	0	7.7818e-05	0.000583635	0.000116727	0	0	0.000233454	7.7818e-05	3.8909e-05	0.000116727	0.000116727	7.7818e-05	0.000311272	0	0.000194545	0.000155636	0	0	0.000116727	0	0	3.8909e-05	0	0	0	7.7818e-05	0	0
20222435	0.000212721	0	0.00345671	1.77267e-05	0.00138268	0.00160427	0.00559278	0.00189676	0.000957243	7.09069e-05	0.00010636	3.54534e-05	0	6.20435e-05	0.00013295	3.54534e-05	3.54534e-05	8.86336e-05	6.20435e-05	1.77267e-05	2.65901e-05	2.65901e-05	0.000168404	0.000673616	0.000452031	1.77267e-05	7.09069e-05	0.000354534	0.00013295	2.65901e-05	0.000301354	2.65901e-05	5.31802e-05	5.31802e-05	0	0.000265901	0.000203857	0	1.77267e-05	0.000274764	4.43168e-05	4.43168e-05	6.20435e-05	1.77267e-05	9.7497e-05	0	5.31802e-05	7.97703e-05	8.86336e-06
20222438	7.20496e-05	0	0.00353043	0	0.00129689	0.00249772	0.00170517	0.00124886	0.000864595	7.20496e-05	2.40165e-05	0	0	4.8033e-05	0.000504347	2.40165e-05	7.20496e-05	4.8033e-05	0	0	2.40165e-05	2.40165e-05	7.20496e-05	0.000600413	0.000264182	0	0	0.000144099	0	0	0.000408281	2.40165e-05	2.40165e-05	4.8033e-05	0	0.000120083	0.000288198	0	0	0.000576397	0	2.40165e-05	9.60661e-05	0	0	2.40165e-05	4.8033e-05	9.60661e-05	0
20222442	0	0	0.000447427	0	0.000447427	0.00119314	0.00223714	0.001044	0.000745712	0	0	0	0	0	0.000149142	0	0	0.000298285	0.000149142	0	0.000298285	0	0	0.000447427	0.000298285	0	0.00208799	0.000149142	0	0	0.000298285	0	0	0	0	0.000149142	0.00134228	0	0	0.000298285	0	0	0.000298285	0	0	0	0	0.000149142	0
20222445	0.000116266	0	0.000697593	0	0.000988257	0.000813859	0.00174398	0.000988257	0.000871992	0	5.81328e-05	0	0	5.81328e-05	0	5.81328e-05	0	0	0	0	0	0	5.81328e-05	0.000348797	0.000232531	0	0	0.000116266	0	0	0.000290664	0.000174398	5.81328e-05	5.81328e-05	0	0.000232531	0.000639461	0	0	0.000697593	0	0.000116266	0	0	0.000116266	0	0	0	0
20222447	0.000196353	3.77602e-06	0.000508252	5.05986e-05	0.00669865	0.000623043	0.000570934	0.00542009	0.00186686	0.000295284	0.000443304	3.02081e-05	6.04163e-06	6.57027e-05	0.000191822	7.32547e-05	0.000106484	9.21348e-05	7.40099e-05	3.17185e-05	4.22914e-05	3.77602e-05	0.000532418	0.0013503	0.000488616	4.90882e-05	5.73954e-05	0.000178228	0.000104973	5.05986e-05	0.000193332	7.55203e-05	4.0781e-05	0.000114791	5.28642e-06	0.000292264	0.000302081	1.58593e-05	4.60674e-05	0.000416872	3.54945e-05	5.51298e-05	0.000121588	4.30466e-05	6.19267e-05	2.26561e-05	6.72131e-05	3.77602e-05	5.28642e-06
20222459	7.78134e-05	0	0.000200677	0	0.000503739	0.000249822	0.000221154	0.00200267	0.00036859	5.32407e-05	3.27635e-05	8.19088e-06	4.09544e-06	2.04772e-05	9.00997e-05	7.78134e-05	4.91453e-05	2.86681e-05	5.73362e-05	2.45726e-05	9.00997e-05	0.000122863	0.000180199	0.000221154	0.000139245	4.09544e-05	2.86681e-05	0.000286681	0.000106481	9.00997e-05	0.000217058	4.50498e-05	5.32407e-05	0.000307158	8.19088e-06	0.000155627	9.82906e-05	4.09544e-06	8.19088e-06	0.00102386	4.91453e-05	5.73362e-05	4.91453e-05	4.09544e-06	9.00997e-05	0	1.22863e-05	2.86681e-05	1.63818e-05
20222471	0.000169076	0	0.00135261	0	0.00042269	0.000464959	0.00257841	0.00219799	0.00143715	4.2269e-05	0	0	0	0	4.2269e-05	4.2269e-05	0	0	0.000126807	0	8.4538e-05	0	8.4538e-05	0.000253614	0	8.4538e-05	0	8.4538e-05	0	4.2269e-05	0	0.000126807	0	8.4538e-05	0	4.2269e-05	8.4538e-05	0	0	0.000126807	0.000211345	0	0	0	0	4.2269e-05	4.2269e-05	0	4.2269e-05
20222483	0	0	0.00311358	0	0.000270746	0.000812238	0.00189522	0.00121836	0.0014891	0.000406119	0	0	0	0	0	0	0.000135373	0	0	0	0	0.000135373	0	0.000135373	0	0.000270746	0.000135373	0.000135373	0	0.000406119	0.00121836	0	0	0.000135373	0	0.000135373	0.000270746	0	0	0.000406119	0	0	0	0	0	0	0	0	0
20222499	0.000130327	1.19566e-06	0.000514133	8.36961e-06	0.0020111	0.000885983	0.000386198	0.00367665	0.00135707	0.000166197	0.000108805	7.17395e-06	1.19566e-06	4.18481e-05	0.000133914	6.45656e-05	4.78264e-05	2.98915e-05	5.02177e-05	2.03262e-05	2.63045e-05	1.43479e-05	0.00021761	0.000648047	0.00031685	5.14133e-05	7.53265e-05	0.000112392	0.000114783	3.94567e-05	0.000204458	8.60874e-05	9.68484e-05	6.09786e-05	5.97829e-06	0.000234349	0.000264241	7.17395e-06	1.55436e-05	0.000286958	2.75002e-05	5.97829e-05	8.84788e-05	1.67392e-05	9.4457e-05	1.55436e-05	5.50003e-05	4.42394e-05	1.19566e-06
20224527	3.24286e-05	0	0.000194571	0	0.000583714	0.000594524	1.08095e-05	0.000270238	0.000129714	5.40476e-05	8.64762e-05	9.72857e-05	0	0.000216191	0.00166467	0.00046481	0.00129714	0.000551286	0.00046481	2.16191e-05	3.24286e-05	0.00234567	0.000540476	0.00232405	0.00112419	0.00111338	0.000356714	0.00425895	0.000713429	0.00118905	0.0187545	0.000799905	0.000367524	0.00108095	0.000335095	0.00151333	0.000475619	2.16191e-05	2.16191e-05	0.00398871	2.16191e-05	4.32381e-05	9.72857e-05	8.64762e-05	9.72857e-05	2.16191e-05	0.000118905	7.56667e-05	0
20224540	2.11064e-05	0	0.000105532	0	0.000147745	0.000189958	1.05532e-05	0.000105532	3.16596e-05	2.11064e-05	2.11064e-05	0	0	5.2766e-05	0.00199455	0.000548766	0.00206843	0.000485447	0.000316596	8.44256e-05	2.11064e-05	0.00252221	0.00029549	0.000907575	0.00110809	0.00379915	0.000348256	0.0254754	0.000928681	0.00675405	0.0351316	0.00144579	0.000580426	0.0253593	0.001488	0.0100361	0.000284936	1.05532e-05	2.11064e-05	0.00318707	2.11064e-05	2.11064e-05	8.44256e-05	5.2766e-05	0.000116085	1.05532e-05	6.33192e-05	0	2.11064e-05
20224581	0	0	4.45951e-05	0	0.000133785	0.00017838	4.45951e-05	8.91902e-05	4.45951e-05	4.45951e-05	0	0	0	0	0.000668926	0.000981092	0.00124866	0.000445951	0.000535141	0.00017838	0	0.00205137	0.000222975	0.00129326	0.000891902	0.0026757	0.000713521	0.0657331	0.00142704	0.00838387	0.121343	0.000847306	0.000981092	0.0370585	0.00303247	0.0149839	8.91902e-05	4.45951e-05	0	0.00280949	4.45951e-05	0	0	0	8.91902e-05	0	0	0	0
20224918	0	0	0	0	0.00021889	0.00021889	0	0.00142279	0	0	0	0	0	0	0	0.00021889	0	0.000328335	0.000109445	0	0	0	0.00021889	0.000547226	0.000109445	0.000766116	0	0.000109445	0.000328335	0	0.000328335	0.000109445	0.000109445	0.000109445	0.000109445	0.000109445	0.00021889	0	0	0.000109445	0	0.000109445	0	0	0	0	0	0	0
20224923	0	0	0.000882439	0	0.000196098	0.000196098	0	0	0	9.80488e-05	0	0	0	9.80488e-05	0.000196098	9.80488e-05	9.80488e-05	0	9.80488e-05	0	0.000196098	0.000686342	0	0.000294146	0	0.000294146	9.80488e-05	0.00205903	9.80488e-05	0.000294146	0.00205903	9.80488e-05	0	0.000196098	0	0.000588293	0	0	0	0.00205903	0	0	9.80488e-05	0	0	0	9.80488e-05	0	0
20224947	0	0	0.000185789	0	0.000516081	0.000175468	0	0.000227076	7.22514e-05	4.12865e-05	8.2573e-05	2.06432e-05	0	2.06432e-05	0.000196111	0.000113538	0.000289005	0.000227076	8.2573e-05	1.03216e-05	4.12865e-05	0.000485116	4.12865e-05	0.0007638	0.000309649	0.000289005	6.19297e-05	0.000743157	0.000144503	0.000123859	0.000495438	0.000247719	4.12865e-05	0.00031997	4.12865e-05	0.000350935	0.000216754	0	1.03216e-05	0.00110441	1.03216e-05	5.16081e-05	0	2.06432e-05	8.2573e-05	0	0	1.03216e-05	1.03216e-05
20224959	3.23102e-05	0	0.000646204	0	0.000484653	0.000936995	9.69305e-05	9.69305e-05	0.000226171	3.23102e-05	0.000129241	0	0	6.46204e-05	0.000355412	0.000484653	0.000161551	6.46204e-05	0.000161551	0.000129241	0.000807754	0.000323102	0.000161551	0.000743134	0.000355412	9.69305e-05	9.69305e-05	0.00122779	0.000484653	0.000193861	0.000355412	0.000226171	9.69305e-05	0.000323102	0	0.000387722	0.000258481	0	3.23102e-05	0.000936995	3.23102e-05	0	9.69305e-05	0	3.23102e-05	0	6.46204e-05	3.23102e-05	0
20224971	0	0	0.000260073	0	9.89011e-05	0.000274725	2.1978e-05	4.0293e-05	1.0989e-05	3.663e-06	7.32601e-05	7.32601e-06	0	1.0989e-05	0.000190476	0.000153846	0.000124542	0.000186813	9.15751e-05	3.663e-06	2.5641e-05	0.000406593	1.4652e-05	0.000212454	0.000161172	8.79121e-05	3.663e-05	0.000358974	0.000139194	8.79121e-05	0.000373626	9.15751e-05	6.59341e-05	0.000113553	1.4652e-05	0.000172161	0.000161172	7.32601e-06	7.32601e-06	0.00125641	0	3.663e-06	2.9304e-05	3.663e-06	8.79121e-05	7.32601e-06	1.8315e-05	3.663e-06	3.663e-06
20224983	0	0	0.000823845	0	0.0006971	0.000802721	6.33727e-05	0.0006971	0.000253491	0.000253491	0.000295739	6.33727e-05	0	0	0.000105621	0.000190118	4.22485e-05	4.22485e-05	0.000105621	0	6.33727e-05	0.000105621	0	0.000528106	0.000485857	4.22485e-05	8.44969e-05	0.00054923	8.44969e-05	2.11242e-05	0.000380236	6.33727e-05	6.33727e-05	0.000168994	4.22485e-05	0.00054923	0.000211242	0	2.11242e-05	0.000739348	0	0	8.44969e-05	0	4.22485e-05	4.22485e-05	6.33727e-05	2.11242e-05	0
20224999	3.04414e-05	6.08828e-06	0.000267884	2.43531e-05	0.000980213	0.000365297	0.000207002	0.000651446	0.000243531	7.91476e-05	2.43531e-05	1.82648e-05	0	9.13242e-05	9.13242e-05	0.000158295	4.2618e-05	6.69711e-05	0.000127854	1.21766e-05	0.000121766	8.52359e-05	0.00014003	0.000773212	0.000261796	5.47945e-05	0.000103501	0.000249619	0.000115677	3.65297e-05	0.000255708	7.91476e-05	7.30594e-05	0.000164384	6.08828e-06	0.00035312	0.000200913	6.08828e-06	3.04414e-05	0.000462709	2.43531e-05	0.000359209	1.82648e-05	0	4.2618e-05	0	0	4.87062e-05	0
20225611	0	0	0.000651082	0	0.00108514	0.000930117	0.000248031	0.000248031	6.20078e-05	0.000372047	0.000496063	0	0	0.00015502	6.20078e-05	0.000434055	3.10039e-05	0.00015502	0.000217027	9.30117e-05	9.30117e-05	0	0.000124016	0.00102313	0.000372047	9.30117e-05	0.000186023	0.00582873	0.00108514	9.30117e-05	0.0175792	0.000496063	0.000403051	0.00111614	9.30117e-05	0.00257332	0.000744094	0	0.000186023	0.000186023	0	0	3.10039e-05	6.20078e-05	3.10039e-05	0	0	0	0
20225678	0	0	0.000184031	2.62902e-05	0.000446933	0.000814996	7.88706e-05	0.000184031	0.000473223	7.88706e-05	0.000157741	2.62902e-05	0	0	0.000499514	0.000657255	7.88706e-05	0.000368063	0.000446933	5.25804e-05	0.000368063	0.000709835	0.000157741	0.00136709	0.000683545	0.000184031	0.000341772	0.00333885	0.000604674	0.000262902	0.0522123	0.000552094	0.000473223	0.00126193	0.000841286	0.00184031	0.000604674	0	2.62902e-05	0.000630965	2.62902e-05	5.25804e-05	5.25804e-05	2.62902e-05	7.88706e-05	0	2.62902e-05	5.25804e-05	2.62902e-05
20225683	3.39087e-05	0	0.000406904	2.26058e-05	0.000813808	0.00186498	2.26058e-05	0.000293875	0.000101726	0.00015824	0.000259966	4.52115e-05	0	7.91202e-05	0.000248663	0.000870322	5.65144e-05	0.000214755	0.000406904	4.52115e-05	4.52115e-05	3.39087e-05	9.04231e-05	0.00125462	0.000452115	0.000203452	0.000553841	0.00324393	0.00113029	0.000237361	0.03019	0.000655567	0.000440812	0.000994654	0.00015824	0.00336826	0.000361692	0	5.65144e-05	0.000226058	2.26058e-05	2.26058e-05	0.000124332	3.39087e-05	0.000101726	0	5.65144e-05	1.13029e-05	1.13029e-05
20225696	4.85968e-05	0	0.000728952	0	0.00089904	0.000510266	4.85968e-05	0.00014579	0	0.000413073	0.00126352	0.000777548	0	9.71935e-05	0.000437371	0.00218685	4.85968e-05	0.000364476	0.00102053	9.71935e-05	0.000170089	9.71935e-05	0.000291581	0.00201677	0.000826145	0.000728952	0.00330458	0.0442231	0.00488398	0.00128781	0.282882	0.0015065	0.00264852	0.00690074	0.00225975	0.0199247	0.000461669	0	9.71935e-05	0.000704653	0	4.85968e-05	0.000218685	7.28952e-05	0.000242984	7.28952e-05	4.85968e-05	4.85968e-05	4.85968e-05
20226615	0.00649048	6.1231e-06	0.00109603	1.22462e-05	0.00165324	0.00112665	0.00176958	0.00265742	0.0127667	0.000330647	7.96003e-05	2.44924e-05	0	7.34772e-05	0.000202062	7.96003e-05	5.51079e-05	4.89848e-05	3.06155e-05	3.06155e-05	6.1231e-05	0	0.000446986	0.00105317	0.000453109	6.73541e-05	5.51079e-05	0.000116339	5.51079e-05	3.06155e-05	7.96003e-05	3.67386e-05	6.1231e-05	9.18465e-05	6.1231e-06	0.000398001	0.000195939	0	6.1231e-06	0.00017757	1.83693e-05	4.89848e-05	7.34772e-05	1.22462e-05	3.06155e-05	0	6.1231e-05	3.06155e-05	1.83693e-05
20226628	0.000325004	0	0.00837787	0.000108335	0.00400838	0.0219197	0.0957677	0.000830565	0.0199336	0.000361115	0.000361115	7.2223e-05	0	0	0	3.61115e-05	0	0	0	0	0.000108335	0	0.000144446	0.000686119	0.000180558	0	0.000108335	0.000397227	0.000144446	0	0.000758342	0	3.61115e-05	3.61115e-05	0	3.61115e-05	0.000108335	3.61115e-05	0	0.000144446	0	3.61115e-05	0	0	7.2223e-05	0	0	0	0
20226638	0.000809422	0	0.000526124	0	0.00178073	0.000688008	0.00238779	0.00149743	0.00287345	0.000242827	4.04711e-05	0	0	0	0.000242827	8.09422e-05	0	0	0.000121413	0	4.04711e-05	0	0.000161884	0.000849893	0.000202355	0	8.09422e-05	0.000242827	8.09422e-05	0	0.000161884	0.000161884	0	4.04711e-05	0	0.000485653	0.000242827	4.04711e-05	4.04711e-05	0.000161884	0	4.04711e-05	4.04711e-05	8.09422e-05	0.000202355	0	4.04711e-05	0	0
20226647	0.000343615	0	0.00222339	2.02126e-05	0.00428508	0.00133403	0.129967	0.00386061	0.212576	0.000545741	0.000181914	0.000101063	0	0	2.02126e-05	2.02126e-05	0	0	0	0	2.02126e-05	2.02126e-05	0.000222339	0.000646804	0.000262764	2.02126e-05	0	0.000141488	4.04253e-05	0	2.02126e-05	0	2.02126e-05	0.000121276	0	0.000101063	8.08505e-05	0	0	0.000101063	0	0	6.06379e-05	0	2.02126e-05	2.02126e-05	0	2.02126e-05	2.02126e-05
20226657	0.000156565	2.23664e-05	0.00100649	0	0.00183404	0.000268396	0.000111832	0.00845448	0.00136435	0.00024603	0.000156565	2.23664e-05	0	4.47327e-05	0.000290763	2.23664e-05	6.70991e-05	0.000111832	0.000111832	4.47327e-05	0	0.000178931	0.00120778	0.00118542	0.000357862	8.94654e-05	4.47327e-05	8.94654e-05	8.94654e-05	6.70991e-05	4.47327e-05	6.70991e-05	4.47327e-05	8.94654e-05	0	0.00024603	0.000156565	0	6.70991e-05	0.000335495	0	0.000111832	6.70991e-05	6.70991e-05	0.000111832	0	6.70991e-05	4.47327e-05	0
20226666	0.00123609	1.93745e-05	0.00861003	1.93745e-05	0.000895103	0.000383615	0.00350291	0.00532412	0.00800167	0.00221257	0.000306117	7.74981e-06	0	3.8749e-06	1.16247e-05	1.54996e-05	3.8749e-06	1.16247e-05	3.8749e-06	1.54996e-05	0	1.16247e-05	0.00589373	0.00354554	8.91228e-05	4.64988e-05	7.74981e-06	7.74981e-06	1.54996e-05	7.74981e-06	3.09992e-05	1.93745e-05	4.64988e-05	7.74981e-06	3.8749e-06	5.42486e-05	2.32494e-05	0	0	0.000123997	0	1.54996e-05	3.09992e-05	0	3.8749e-06	0	3.8749e-06	1.54996e-05	3.8749e-06
20226670	0.000870755	0	0.00640627	0	0.00155492	0.00167931	0.00223908	0.00261227	0.0018659	0.000497574	0.000310984	0	0	6.21968e-05	0.00018659	0	0	6.21968e-05	0.000124394	0.000124394	6.21968e-05	6.21968e-05	0.000870755	0.00174151	0.000995149	0	6.21968e-05	0.00018659	6.21968e-05	6.21968e-05	6.21968e-05	6.21968e-05	0	6.21968e-05	0	0.000310984	0.000373181	6.21968e-05	0	6.21968e-05	0	0	6.21968e-05	0	0	0	6.21968e-05	0	6.21968e-05
20226685	0.00016909	0	0.00109909	0	0.000591816	0.000422726	0.00118363	0.00376226	0.00249408	0.000126818	0	0.000126818	0	0	8.45451e-05	4.22726e-05	4.22726e-05	0.000126818	0	0	8.45451e-05	0	0.000929997	0.00152181	0.000253635	0	0	0.000211363	4.22726e-05	0	0	0	8.45451e-05	0.000295908	0	0.000338181	8.45451e-05	0	0	0.000211363	0	0	0	4.22726e-05	0	0	0	4.22726e-05	0
20229015	0.000193949	0	0.000471019	0	0.000526432	0.000193949	2.7707e-05	0.00698216	0.000304777	2.7707e-05	0.000138535	5.54139e-05	0	0	0.000249363	2.7707e-05	0.00121911	0.000249363	2.7707e-05	0	0	0.00221656	0.000304777	0.000858916	0.000138535	0.000775795	0.000110828	0.000581846	0.000138535	0.000581846	0.000138535	0.000387898	8.31209e-05	0.000221656	2.7707e-05	0.000249363	5.54139e-05	2.7707e-05	0	0.00307547	0	0	2.7707e-05	0	5.54139e-05	0	0	0	2.7707e-05
20229031	9.24834e-05	0	0.000184967	2.31209e-05	0.00129477	0.000362227	0.000262036	0.0142733	0.000516366	0.000123311	6.93626e-05	1.54139e-05	0	9.24834e-05	0.000123311	5.39487e-05	1.54139e-05	5.39487e-05	5.39487e-05	0	6.16556e-05	4.62417e-05	0.000154139	0.000578021	0.000231209	0	0	0.000138725	4.62417e-05	8.47765e-05	7.70695e-05	5.39487e-05	3.85348e-05	9.24834e-05	7.70695e-06	0.000161846	0.000154139	7.70695e-06	7.70695e-06	0.000408468	7.70695e-06	2.31209e-05	1.54139e-05	7.70695e-06	3.85348e-05	0	1.54139e-05	0	7.70695e-06
20229039	6.07718e-05	0	0.000303859	0	0.00227894	3.03859e-05	0	0.00145852	0.000121544	9.11577e-05	0.000121544	0	0	3.03859e-05	0.00100273	6.07718e-05	0.00328168	0.00136737	3.03859e-05	3.03859e-05	3.03859e-05	0.00504406	0.000303859	0.000364631	0.000121544	0.00115466	0	0.000334245	9.11577e-05	0.000546946	3.03859e-05	0.000911577	9.11577e-05	3.03859e-05	9.11577e-05	0.000121544	3.03859e-05	0	3.03859e-05	0	0	0	0	0	0	0	0	0	0
20229047	0.000231422	0	0.000128568	0	0.00035999	0.000179995	0	0.00866547	0.000231422	0.000205708	7.71407e-05	0	0	0	0.000231422	0.000128568	7.71407e-05	0.000179995	2.57136e-05	2.57136e-05	5.14271e-05	0	0.000334276	0.000308563	0.000385703	5.14271e-05	5.14271e-05	0.00043713	7.71407e-05	0	0.000179995	0.000231422	2.57136e-05	0.000179995	2.57136e-05	7.71407e-05	5.14271e-05	0	0	0.00035999	0	0	2.57136e-05	7.71407e-05	7.71407e-05	0	2.57136e-05	0	0
20229063	0.00273323	0	0.000181578	9.55676e-06	0.000831438	0.000258032	2.86703e-05	0.00476882	0.0010608	3.8227e-05	2.86703e-05	1.91135e-05	0	4.77838e-05	2.86703e-05	3.8227e-05	0.000105124	3.8227e-05	1.91135e-05	1.91135e-05	9.55676e-06	0.000105124	7.64541e-05	0.000181578	0.000286703	8.60108e-05	2.86703e-05	8.60108e-05	2.86703e-05	4.77838e-05	3.8227e-05	5.73405e-05	9.55676e-06	6.68973e-05	0	0.000124238	0.000105124	0	0	0.000410941	0	1.91135e-05	0	2.86703e-05	5.73405e-05	0	9.55676e-06	2.86703e-05	0
20229079	6.97496e-05	0	0.000244124	0	0.000627746	0.000313873	0.000244124	0.0192509	0.000244124	0.000139499	0	0	0	6.97496e-05	0.000104624	0.000104624	3.48748e-05	0	0.000139499	0	0	0	0.000174374	0.000697496	0.000174374	0	0	0.000174374	0.000104624	3.48748e-05	0.000104624	0	3.48748e-05	0.000139499	0	6.97496e-05	3.48748e-05	0	0	0.000174374	0	3.48748e-05	0	3.48748e-05	0	0	0	0	3.48748e-05
20229099	0.000686299	0	0.000154067	7.00305e-06	0.00158269	0.000329143	2.80122e-05	0.00602962	0.000196085	7.70335e-05	7.00305e-05	7.00305e-06	2.80122e-05	3.50152e-05	4.90213e-05	3.50152e-05	2.10091e-05	4.90213e-05	1.40061e-05	3.50152e-05	2.10091e-05	2.10091e-05	4.20183e-05	0.000623271	0.000196085	7.00305e-06	1.40061e-05	0.000112049	4.90213e-05	0.000112049	0.00016107	7.70335e-05	2.10091e-05	5.60244e-05	7.00305e-06	0.000210091	0.000140061	0	1.40061e-05	0.000217094	0	4.20183e-05	4.20183e-05	1.40061e-05	4.90213e-05	0	3.50152e-05	1.40061e-05	0
20229415	0.000330063	0	0.00042008	0	0.000660125	0.000780148	0.00243046	0.0125424	0.00201038	0.000120023	6.00114e-05	0	0	0	0.000240046	6.00114e-05	9.00171e-05	0	6.00114e-05	0	3.00057e-05	6.00114e-05	0.00021004	0.000570108	0.000330063	0	6.00114e-05	0.00021004	6.00114e-05	6.00114e-05	3.00057e-05	3.00057e-05	0	9.00171e-05	0	0.00021004	9.00171e-05	0	0	0.000330063	0	9.00171e-05	6.00114e-05	0	9.00171e-05	0	9.00171e-05	6.00114e-05	0
20229431	0.000102997	0	0.000500272	2.94278e-05	0.0047673	0.000382561	0.000191281	0.00609155	0.000367847	0.000235422	0.000514986	5.88556e-05	0	1.47139e-05	0.000220708	5.88556e-05	0.000691553	0.000161853	2.94278e-05	0	1.47139e-05	0.000720981	0.000779836	0.00123597	0.00026485	0.000456131	5.88556e-05	0.000382561	5.88556e-05	0.000411989	0.000117711	0.000294278	7.35694e-05	0.000191281	1.47139e-05	0.000220708	0.000191281	1.47139e-05	0	0.00157439	5.88556e-05	0	7.35694e-05	7.35694e-05	5.88556e-05	1.47139e-05	1.47139e-05	0	0
20229447	0.000123771	2.75046e-05	0.00017878	0	0.00132022	0.000673864	0.000852644	0.0946847	0.00100392	0.000137523	5.50093e-05	2.75046e-05	0	6.87616e-05	0.00035756	6.87616e-05	2.75046e-05	9.62662e-05	1.37523e-05	0	1.37523e-05	1.37523e-05	0.000137523	0.000701368	0.000343808	1.37523e-05	4.1257e-05	0.000247542	6.87616e-05	1.37523e-05	8.25139e-05	4.1257e-05	8.25139e-05	4.1257e-05	0	0.000288799	0.00017878	0	1.37523e-05	0.000220037	0	1.37523e-05	6.87616e-05	0	9.62662e-05	0	6.87616e-05	4.1257e-05	4.1257e-05
20229463	0.000201207	0	0.000389001	1.34138e-05	0.000979209	0.00056338	0.00604963	0.0397854	0.00219987	0.00017438	5.36553e-05	0	0	2.68276e-05	0.000120724	6.70691e-05	1.34138e-05	6.70691e-05	4.02414e-05	1.34138e-05	6.70691e-05	0	0.000201207	0.000630449	0.000308518	1.34138e-05	4.02414e-05	0.000187793	0.000107311	2.68276e-05	6.70691e-05	0.000201207	1.34138e-05	0.000134138	1.34138e-05	0.000308518	0.000308518	1.34138e-05	1.34138e-05	0.000254863	4.02414e-05	5.36553e-05	0.000147552	2.68276e-05	0.000107311	0	0.00017438	4.02414e-05	1.34138e-05
20229479	0	0	0.000370832	6.74241e-05	0.0019553	0.000235984	0.000202272	0.0632438	0.00114621	0.000134848	0.000303408	0	0	0	0.000101136	3.3712e-05	6.74241e-05	0.000101136	6.74241e-05	6.74241e-05	0	3.3712e-05	0.000134848	0.000640529	0.00033712	3.3712e-05	0	0.00033712	0.000134848	3.3712e-05	0.00016856	0.000235984	0	0.00016856	0	0.000202272	0.000101136	0	0	0.00033712	3.3712e-05	0	0.000202272	6.74241e-05	0.000101136	0	3.3712e-05	0	3.3712e-05
20464347	0	6.71411e-05	0.000425227	0	0.00194709	0.000111902	0	0	8.95215e-05	0.000223804	0.000111902	4.47608e-05	0	4.47608e-05	6.71411e-05	2.23804e-05	0	2.23804e-05	4.47608e-05	0	0	2.23804e-05	0.0129806	0.0188443	0.00243946	0	0	4.47608e-05	2.23804e-05	0	4.47608e-05	4.47608e-05	4.47608e-05	2.23804e-05	0	0.000156663	8.95215e-05	4.47608e-05	0	0.000111902	0	4.47608e-05	4.47608e-05	0	4.47608e-05	0	8.95215e-05	6.71411e-05	0
20464975	3.48971e-06	6.97941e-06	3.31522e-05	1.39588e-05	0.00103295	5.40905e-05	3.48971e-06	2.26831e-05	5.40905e-05	0.000111671	4.53662e-05	1.04691e-05	0	2.79177e-05	2.79177e-05	4.36213e-05	2.09382e-05	5.23456e-06	2.61728e-05	6.97941e-06	6.97941e-06	1.74485e-05	0.00135052	0.00226133	0.00102423	1.74485e-05	1.04691e-05	1.57037e-05	1.39588e-05	8.72427e-06	8.72427e-06	2.09382e-05	1.04691e-05	8.72427e-06	0	6.63044e-05	9.42221e-05	1.74485e-06	1.2214e-05	3.31522e-05	1.39588e-05	1.74485e-05	2.44279e-05	1.57037e-05	2.96625e-05	2.26831e-05	4.7111e-05	3.31522e-05	1.2214e-05
20464999	5.2225e-06	0	1.0445e-05	1.0445e-05	0.000981831	5.74476e-05	0	7.31151e-05	0.00018801	0.000151453	0.000130563	2.61125e-05	0	7.31151e-05	4.178e-05	2.61125e-05	5.2225e-06	3.1335e-05	1.0445e-05	1.56675e-05	1.0445e-05	0	0.00126907	0.00214123	0.000992276	0	0	1.56675e-05	2.089e-05	0	5.2225e-06	5.2225e-06	0	5.2225e-06	0	0.00012534	3.65575e-05	0	2.61125e-05	5.2225e-05	5.2225e-06	3.65575e-05	1.0445e-05	5.2225e-06	1.0445e-05	1.56675e-05	2.089e-05	2.61125e-05	5.2225e-06
20466171	0	0	1.23381e-05	0	0.000111043	0	0	0	0	3.70142e-05	2.46761e-05	0	0	4.93523e-05	0	1.23381e-05	0	1.23381e-05	1.23381e-05	0	0	3.70142e-05	0.00716841	0.00225787	0.000468846	0	0	1.23381e-05	0	0	0	0	0	0	0	9.87045e-05	1.23381e-05	0	0	0	1.23381e-05	0	1.23381e-05	0	0	0	0	1.23381e-05	0
20466531	0	1.26271e-05	1.26271e-05	0	0.000479828	5.05082e-05	0	1.26271e-05	0	6.31353e-05	5.05082e-05	3.78812e-05	1.26271e-05	0	0	2.52541e-05	0	0	1.26271e-05	2.52541e-05	1.26271e-05	0	0.00517709	0.00580845	0.000656607	2.52541e-05	0	0	3.78812e-05	1.26271e-05	1.26271e-05	0	5.05082e-05	0	0	0.000101016	6.31353e-05	0	0	6.31353e-05	1.26271e-05	5.05082e-05	3.78812e-05	0	3.78812e-05	3.78812e-05	3.78812e-05	0	8.83894e-05
20466742	0	3.06213e-05	3.06213e-05	6.12426e-05	0.000520562	9.18639e-05	0	0.000153107	0	3.06213e-05	0.000214349	0	9.18639e-05	3.06213e-05	9.18639e-05	0.000183728	0	6.12426e-05	3.06213e-05	0	0	6.12426e-05	0.00297027	0.00471568	0.0027253	0	0	9.18639e-05	0	0	6.12426e-05	9.18639e-05	0	3.06213e-05	0	0.000153107	9.18639e-05	6.12426e-05	0	9.18639e-05	0	3.06213e-05	0.000153107	9.18639e-05	9.18639e-05	3.06213e-05	3.06213e-05	6.12426e-05	0
20466763	0	0	2.62519e-05	0	0.000387215	0.000111571	0	2.62519e-05	1.96889e-05	3.93778e-05	3.28149e-05	6.56297e-06	1.31259e-05	2.62519e-05	1.96889e-05	3.93778e-05	6.56297e-06	2.62519e-05	2.62519e-05	3.28149e-05	6.56297e-06	0	0.00209359	0.00431844	0.00227735	6.56297e-06	6.56297e-06	2.62519e-05	3.28149e-05	1.31259e-05	3.93778e-05	7.87557e-05	1.31259e-05	1.31259e-05	0	0.000196889	0.000105008	6.56297e-06	1.31259e-05	7.87557e-05	1.31259e-05	7.21927e-05	4.59408e-05	5.90667e-05	5.25038e-05	1.96889e-05	3.28149e-05	7.87557e-05	3.93778e-05
20467035	1.42664e-05	2.85327e-05	7.13318e-05	1.42664e-05	0.000485056	5.70654e-05	0	1.42664e-05	5.70654e-05	8.55981e-05	1.42664e-05	0	0	0	8.55981e-05	2.85327e-05	1.42664e-05	0	5.70654e-05	0	0	1.42664e-05	0.0113418	0.00691918	0.00185463	0	0	1.42664e-05	4.27991e-05	0	0	2.85327e-05	0	0	0	0.00015693	5.70654e-05	1.42664e-05	0	5.70654e-05	0	2.85327e-05	1.42664e-05	0	0	0	4.27991e-05	4.27991e-05	0
20467099	1.1669e-05	5.25106e-05	4.66761e-05	1.1669e-05	0.000367574	2.91725e-05	0	2.91725e-05	4.08416e-05	4.66761e-05	2.3338e-05	0	5.83451e-06	0	1.75035e-05	3.50071e-05	5.83451e-06	1.1669e-05	4.08416e-05	5.83451e-06	0	5.83451e-06	0.00268387	0.00264887	0.00141779	0	5.83451e-06	1.1669e-05	1.75035e-05	0	1.1669e-05	1.75035e-05	0	0	0	0.000122525	0.000140028	0	2.3338e-05	3.50071e-05	5.83451e-06	1.75035e-05	2.3338e-05	0	1.75035e-05	5.83451e-06	0	2.91725e-05	3.50071e-05
20467776	0	0	1.48608e-05	0	0.000118887	0.000118887	0	1.48608e-05	0	7.43041e-05	2.97217e-05	0	0	2.97217e-05	8.9165e-05	0	0	1.48608e-05	0	1.48608e-05	1.48608e-05	0	0.00053499	0.00176844	0.000861928	0	0	1.48608e-05	2.97217e-05	1.48608e-05	1.48608e-05	1.48608e-05	1.48608e-05	0	0	5.94433e-05	4.45825e-05	0	0	5.94433e-05	0	7.43041e-05	4.45825e-05	1.48608e-05	1.48608e-05	0	0	0.000118887	0
20468076	0	0	3.54877e-05	0	0.000168567	2.66158e-05	0	6.21035e-05	0	2.66158e-05	8.87193e-06	8.87193e-06	0	7.09755e-05	4.43597e-05	0	0	2.66158e-05	1.77439e-05	8.87193e-06	0	8.87193e-06	0.000390365	0.00082509	0.000425853	0	0	0	1.77439e-05	0	0	8.87193e-06	0	0	0	3.54877e-05	0.000168567	0	0	6.21035e-05	8.87193e-06	9.75913e-05	2.66158e-05	0	0	0	0	1.77439e-05	0
20468099	0	0	0.000113937	0	0.000159511	9.11494e-05	0	4.55747e-05	0	6.8362e-05	0	0	0	6.8362e-05	2.27873e-05	2.27873e-05	2.27873e-05	2.27873e-05	0	0	0	0	0.000113937	0.000638046	0.000250661	0	0	0	0	0	0	2.27873e-05	0	0	0	2.27873e-05	0	0	2.27873e-05	4.55747e-05	2.27873e-05	0	0	0	2.27873e-05	0	0	0	0
20517323	6.5842e-05	8.23025e-06	1.64605e-05	1.64605e-05	0.000197526	2.46907e-05	0	2.46907e-05	0	1.64605e-05	8.23025e-06	0	0	0	0.000197526	7.40722e-05	4.93815e-05	2.46907e-05	2.46907e-05	0	0	5.76117e-05	0.000106993	0.000518506	0.000164605	3.2921e-05	8.23025e-06	6.5842e-05	2.46907e-05	0	8.23025e-06	1.64605e-05	0	2.46907e-05	0	0	5.76117e-05	8.23025e-06	0	0.00104524	0	4.11512e-05	3.2921e-05	8.23025e-06	0	0	3.2921e-05	3.2921e-05	8.23025e-06
20752159	0	0	0	0	5.07228e-05	0	0	5.07228e-05	0	0	0	0	0	0	5.07228e-05	0	2.53614e-05	0	0	0	2.53614e-05	2.53614e-05	0.000202891	0.00035506	0.000202891	2.53614e-05	0	2.53614e-05	0	0	7.60842e-05	2.53614e-05	0	0	2.53614e-05	0	0.000126807	0	0	0	0	0	0	0	2.53614e-05	0	0	2.53614e-05	2.53614e-05
20840747	0	0	0.000139675	0	0.000535419	4.65582e-05	0	0	2.32791e-05	2.32791e-05	6.98373e-05	0	0	2.32791e-05	4.65582e-05	4.65582e-05	0	0	6.98373e-05	2.32791e-05	2.32791e-05	4.65582e-05	0.00507484	0.0117792	0.00214168	4.65582e-05	2.32791e-05	0.000186233	2.32791e-05	0	9.31164e-05	4.65582e-05	0	0.00025607	0	2.32791e-05	4.65582e-05	0	0	9.31164e-05	0	6.98373e-05	4.65582e-05	0.000186233	6.98373e-05	2.32791e-05	0	0	2.32791e-05
20840759	0	0	6.96832e-05	0	0.000348416	2.32277e-05	0	0	0.000162594	0.00030196	2.32277e-05	0.000139366	0	2.32277e-05	0	2.32277e-05	0	4.64554e-05	0	0	2.32277e-05	0	0.000766515	0.00222986	0.00127752	4.64554e-05	0	0	0	0	6.96832e-05	2.32277e-05	0	0	0	0	9.29109e-05	0	2.32277e-05	2.32277e-05	2.32277e-05	0	6.96832e-05	0	2.32277e-05	2.32277e-05	9.29109e-05	0	0
20842519	0	0	5.1701e-05	5.1701e-05	0.00222314	0.000206804	0.000155103	5.1701e-05	0	0.000361907	0.000103402	0	0	0.000206804	0.000413608	5.1701e-05	0	0.000103402	5.1701e-05	0.000155103	5.1701e-05	5.1701e-05	0.00418778	0.00842726	0.00237824	5.1701e-05	5.1701e-05	0.000155103	0	0	0	5.1701e-05	5.1701e-05	0.000258505	0	0.000878916	0.000155103	0	0	0.000361907	0	5.1701e-05	0.000155103	0.000310206	0.000310206	0	0.000206804	0.000155103	0.000206804
20842557	0	1.6253e-05	0.000195036	1.6253e-05	0.00277927	0.000178783	1.6253e-05	1.6253e-05	3.25061e-05	0.000503844	0.000146277	0.000113771	0	9.75182e-05	4.87591e-05	4.87591e-05	6.50121e-05	8.12651e-05	3.25061e-05	3.25061e-05	0	3.25061e-05	0.00274676	0.00684252	0.00375445	4.87591e-05	1.6253e-05	4.87591e-05	6.50121e-05	0	0	9.75182e-05	0.000146277	1.6253e-05	0	0.000195036	8.12651e-05	0	1.6253e-05	8.12651e-05	0	6.50121e-05	6.50121e-05	0.000146277	4.87591e-05	0	0.000146277	1.6253e-05	4.87591e-05
20843619	0	2.21469e-05	8.85877e-05	8.85877e-05	0.0032556	0.000155028	0	0.000332204	2.21469e-05	0.00294554	0.000199322	0.000177175	4.42938e-05	6.64408e-05	0.000398645	8.85877e-05	0.00112949	4.42938e-05	0.000132882	0	0.000177175	4.42938e-05	0.00126237	0.00445153	0.00245831	0	0	4.42938e-05	0.000110735	6.64408e-05	4.42938e-05	6.64408e-05	0.000420792	0	0	0.000509379	0.000376498	2.21469e-05	2.21469e-05	0.000221469	2.21469e-05	0.000132882	0.000376498	0.000132882	0.00028791	2.21469e-05	0.000110735	6.64408e-05	0.000132882
20843657	0	0	0.000426951	5.08275e-05	0.0025617	9.14894e-05	1.01655e-05	0	0.000264303	0.000345627	0.000355792	4.0662e-05	0	2.0331e-05	0.000274468	0.000101655	0.000569268	0.000101655	4.0662e-05	0	7.11585e-05	1.01655e-05	0.0017688	0.0109686	0.00108771	6.0993e-05	4.0662e-05	0.00011182	7.11585e-05	0	1.01655e-05	3.04965e-05	4.0662e-05	8.1324e-05	1.01655e-05	0.00011182	0.000182979	1.01655e-05	5.08275e-05	0.000182979	0	0.000142317	0.000142317	0.000121986	0.000254137	2.0331e-05	0.000172813	8.1324e-05	0.000243972
20847538	0	0	0.000108548	0	0.0012483	0	0	0	5.42741e-05	0.000217096	5.42741e-05	0	0	0	0	0	0	0	0	0	0	0	0.000868385	0.00320217	0.000651289	0	0	0	0	0	0	0	0	5.42741e-05	0	0.000217096	0	0	0	0	0	0	0	0	0	0	0	0	0
20847557	0	9.52109e-05	0.000142816	0	0.000642674	2.38027e-05	0	2.38027e-05	0	0.000142816	0	9.52109e-05	0	2.38027e-05	4.76054e-05	0	0	0	9.52109e-05	2.38027e-05	0	0	0.00145197	0.00890222	0.00116633	0	0	0	0	0	4.76054e-05	2.38027e-05	2.38027e-05	2.38027e-05	0	0	0.000166619	0	0	7.14082e-05	4.76054e-05	0.000166619	0	4.76054e-05	0	0	4.76054e-05	0	0
20847576	0	0	0	8.70701e-05	0.000870701	0	0	0	0	0	0	0	0	0	0	0	0	0	0	0	0	0	0.00017414	0.00104484	0.00017414	0	0	0	0	0	0	0	0	8.70701e-05	0	0	0	0	0	8.70701e-05	0	0	0	0	0	0	0	0	0
20847823	0	0	0.000234316	0.000878683	0.0521938	0.000585789	0	0.000117158	0	0.00492063	0.000585789	0.00210884	0	5.85789e-05	0.000410052	0.000117158	0.000117158	0.000175737	0.000234316	0	0	0.000117158	0.000995841	0.00351473	0.00380763	5.85789e-05	0.000117158	5.85789e-05	0.000702947	0	0	0.000117158	5.85789e-05	0.000117158	0	0.000175737	0.000351473	5.85789e-05	0	0.000234316	5.85789e-05	0.000468631	0.00117158	0.000351473	0.000234316	5.85789e-05	0.000468631	0.000117158	0.000175737
20848727	0	6.8495e-06	4.79465e-05	6.16455e-05	0.0179662	0.000123291	2.05485e-05	3.42475e-05	3.42475e-05	0.000698649	0.00118496	2.7398e-05	2.7398e-05	0.000164388	5.4796e-05	0.000123291	1.3699e-05	0.000260281	6.8495e-05	2.05485e-05	8.90435e-05	1.3699e-05	0.00119866	0.00320557	0.00191101	4.79465e-05	2.7398e-05	5.4796e-05	6.8495e-05	0	2.7398e-05	6.16455e-05	5.4796e-05	7.53445e-05	6.8495e-06	5.4796e-05	0.000164388	2.05485e-05	2.7398e-05	6.8495e-05	7.53445e-05	2.7398e-05	0.000184937	9.5893e-05	0.000198636	3.42475e-05	0.00014384	6.8495e-05	6.16455e-05
20848740	0	0	2.04457e-05	7.156e-05	0.000521366	6.13371e-05	0	1.02229e-05	2.04457e-05	6.13371e-05	0.000173789	2.04457e-05	0	2.04457e-05	5.11143e-05	1.02229e-05	2.04457e-05	2.04457e-05	0	0	2.04457e-05	5.11143e-05	0.000807606	0.00351666	0.000705377	0	0	2.04457e-05	0	0	1.02229e-05	1.02229e-05	0	4.08914e-05	0	1.02229e-05	4.08914e-05	0	1.02229e-05	2.04457e-05	0	2.04457e-05	0	3.06686e-05	2.04457e-05	1.02229e-05	1.02229e-05	0	3.06686e-05
20848754	0	0	0	0	0.00141165	0	0	0	0	0	0	0	0	0	0.000470551	7.84252e-05	0	7.84252e-05	0	0	0	0	0.000470551	0.00329386	0.00109795	0	0	0	7.84252e-05	0	0	0.000235276	0	0.000392126	0	0	7.84252e-05	0	0	0	0	0	0	0	0	0	0	0	0
20848799	5.07789e-06	2.53894e-06	6.7282e-05	3.04673e-05	0.00263542	0.000161223	8.8863e-06	3.30063e-05	2.1581e-05	0.000322446	0.000126947	7.36294e-05	0	6.7282e-05	3.42757e-05	4.5701e-05	2.1581e-05	1.90421e-05	1.90421e-05	2.28505e-05	4.69705e-05	1.26947e-05	0.00112602	0.00356849	0.00103462	2.53894e-05	1.01558e-05	1.90421e-05	3.80842e-05	1.65031e-05	2.03116e-05	6.85515e-05	3.93536e-05	3.17368e-05	0	0.000118061	0.000184073	1.65031e-05	2.1581e-05	4.82399e-05	3.30063e-05	6.60126e-05	0.000109175	2.53894e-05	5.71262e-05	1.77726e-05	4.82399e-05	6.34736e-06	2.91979e-05
30261417	0	0	0	0	4.27654e-05	0	0	0	8.55308e-06	0	0	0	0	0	0	0	0	0	0	0	0	0	8.55308e-06	3.42123e-05	0	0	0	0	0	0	0	0	0	0	0	0	0	0	0	0	0	0	8.55308e-06	0	0	0	0	0	0
30261429	0	0	1.06883e-05	0	0.000117572	0	0	0	0	0	1.06883e-05	0	0	0	0	0	0	0	0	0	0	0	1.06883e-05	3.2065e-05	1.06883e-05	0	0	0	2.13767e-05	0	0	0	0	0	0	0	0	0	0	0	0	0	0	0	0	0	0	0	0
30295652	5.08451e-06	0	1.0169e-05	0	1.35587e-05	1.69484e-06	0	0	5.08451e-06	6.77935e-06	1.0169e-05	0	0	0	1.69484e-06	1.69484e-06	0	0	0	0	0	0	3.22019e-05	3.55916e-05	8.47419e-06	0	0	0	0	0	0	0	0	1.69484e-06	0	0	1.69484e-06	0	0	0	0	0	0	1.69484e-06	0	0	0	0	0
30333299	5.43872e-06	1.81291e-06	3.62582e-06	0	3.08194e-05	1.81291e-05	0	9.06454e-06	3.62582e-06	1.9942e-05	3.62582e-06	0	1.81291e-06	1.81291e-06	3.62582e-06	1.08774e-05	5.43872e-06	3.62582e-06	0	0	0	1.81291e-06	2.90065e-05	6.34518e-05	1.08774e-05	3.62582e-06	1.81291e-06	0	0	0	0	1.81291e-06	0	0	0	1.81291e-06	0	0	0	9.06454e-06	0	1.81291e-06	1.08774e-05	0	0	0	1.81291e-06	0	0
30338699	4.36986e-06	3.39878e-06	7.28311e-07	0	9.71081e-06	1.21385e-06	2.4277e-07	4.61263e-06	9.71081e-07	5.34094e-06	9.71081e-07	2.4277e-07	6.31202e-06	1.21385e-06	1.94216e-06	2.4277e-06	9.71081e-07	7.28311e-07	0	0	0	9.71081e-07	7.52588e-06	2.81613e-05	3.39878e-06	0	2.4277e-07	9.71081e-07	7.28311e-07	0	6.06925e-06	4.8554e-07	2.4277e-07	7.28311e-07	2.4277e-07	1.45662e-06	7.28311e-07	2.4277e-07	4.8554e-07	1.21385e-06	4.8554e-07	9.71081e-07	2.4277e-07	2.4277e-07	1.21385e-06	9.71081e-07	1.21385e-06	4.8554e-07	0
30353294	8.04913e-06	8.04913e-06	0	0	8.04913e-06	0	0	0	8.04913e-06	0	8.04913e-06	0	0	0	0	0	8.04913e-06	0	0	0	0	0	2.41474e-05	5.63439e-05	1.60983e-05	0	0	0	0	0	0	0	0	0	0	0	0	0	0	8.04913e-06	8.04913e-06	0	0	0	0	0	0	0	0
30489267	0	0	0	0	9.88641e-06	0	0	1.48296e-05	0	0	2.4716e-06	0	2.22444e-05	2.4716e-06	0	7.4148e-06	0	0	0	0	4.9432e-06	0	9.88641e-06	6.67332e-05	1.97728e-05	0	0	4.9432e-06	0	2.4716e-06	0	0	0	4.9432e-06	0	7.4148e-06	0	0	2.4716e-06	0	2.4716e-06	0	0	0	7.4148e-06	0.000150768	0	0	0
30615299	2.52072e-06	1.20995e-06	1.08895e-05	4.03316e-07	2.57114e-05	4.94062e-06	1.00829e-07	4.13399e-06	1.81492e-06	2.08716e-05	1.91575e-06	8.06632e-07	4.94062e-06	1.20995e-06	1.19987e-05	2.01658e-07	2.62155e-06	1.20995e-06	1.10912e-06	2.01658e-07	3.02487e-07	5.04145e-07	2.36948e-05	5.3641e-05	9.67958e-06	6.04974e-07	1.00829e-07	7.05803e-07	7.05803e-07	1.00829e-07	5.04145e-07	6.04974e-07	8.06632e-07	1.31078e-06	1.00829e-07	1.71409e-06	1.00829e-06	0	2.01658e-07	3.93233e-06	8.06632e-07	1.31078e-06	1.10912e-06	3.02487e-07	4.03316e-07	2.82321e-06	1.10912e-06	2.01658e-07	1.00829e-07
30617215	0	0	0	0	6.76865e-05	0	0	0	0	6.76865e-05	0	0	0	0	0	0	0	0	0	0	0	0	0	0.000338432	0	0	0	0	0	0	0	0	0	0	0	0	0	0	0	0	0	0	0	0	0	0	0	0	0
30824795	0	0	0	0	7.3046e-05	0	0	0	0	0	0	0	0	0	7.3046e-05	0	0	0	0	0	0	0	0	0.000146092	0	0	0	0	0	0	0	0	0	0	0	0	0	0	0	0	0	0	0	0	0	0	0	0	0
40576085	0	0	4.35663e-05	0	2.17832e-05	2.17832e-05	0	0	0	6.53495e-05	0	0	0	0	0	0	0	0	0	0	0	0	0	4.35663e-05	0	0	0	0	0	0	0	0	0	0	0	0	0	0	0	0	0	0	0	0	0	0	0	0	0
40652847	0	4.27844e-05	0	0	6.41766e-05	0	0	0	0	2.13922e-05	4.27844e-05	0	0	0	0	0	0	0	0	0	0	0	0	4.27844e-05	0	0	0	0	0	0	2.13922e-05	0	2.13922e-05	0	0	0	0	0	0	0	0	0	0	0	0	0	0	0	0
40657699	8.40311e-06	7.70285e-06	4.20155e-06	0	6.30233e-06	1.8907e-05	7.00259e-07	7.00259e-07	7.00259e-07	2.10078e-06	7.00259e-07	0	0	7.00259e-07	2.10078e-06	2.10078e-06	1.40052e-06	7.00259e-07	7.00259e-07	0	7.00259e-07	0	1.8907e-05	0.000273801	0.000988766	7.00259e-07	0	2.10078e-06	0	7.00259e-07	0	2.10078e-06	7.00259e-07	1.40052e-06	0	3.5013e-06	7.00259e-07	7.00259e-07	1.40052e-06	1.40052e-06	0	2.80104e-06	3.5013e-06	1.40052e-06	2.80104e-06	0	7.00259e-07	1.40052e-06	0
50108599	3.03763e-06	1.51882e-06	1.36693e-05	1.01254e-06	0.000100242	4.05018e-06	0	4.55645e-06	6.58154e-06	8.10035e-06	6.07526e-06	0	2.53136e-06	5.06272e-07	1.46819e-05	3.03763e-06	1.01254e-06	1.51882e-06	5.56899e-06	0	2.02509e-06	5.06272e-07	5.36648e-05	0.000269843	5.67025e-05	1.51882e-06	0	5.06272e-07	0	5.06272e-07	1.01254e-06	0.000253136	1.51882e-06	5.06272e-07	5.06272e-07	1.31631e-05	1.01254e-05	0	5.06272e-07	3.5439e-06	1.01254e-06	8.10035e-06	2.02509e-06	0	3.5439e-06	2.02509e-06	1.51882e-06	1.51882e-06	0
50647586	0	0	1.57753e-05	0	5.25843e-06	0	0	0	0	1.05169e-05	2.62921e-05	0	0	0	0	0	0	0	0	0	0	0	5.25843e-06	1.05169e-05	5.25843e-06	0	0	0	0	0	0	0	0	0	0	0	0	0	0	6.31011e-05	0	0	0	0	0	0	0	0	0
50690919	4.9392e-06	0	2.4696e-06	0	7.4088e-06	2.4696e-06	0	0	4.9392e-06	0	0	0	2.4696e-06	2.4696e-06	2.4696e-06	0	0	0	0	0	0	0	7.4088e-06	1.97568e-05	0	0	0	0	0	0	0	2.4696e-06	0	2.4696e-06	0	0	0	0	0	0	0	2.96352e-05	0	1.97568e-05	0	0	0	0	0
50696351	4.17175e-05	2.19566e-06	2.19566e-06	0	1.09783e-05	0	0	0	0	0	6.58698e-06	2.19566e-06	2.19566e-06	0	4.39132e-06	0	0	0	0	0	0	0	8.78264e-06	3.51306e-05	6.58698e-06	2.19566e-06	0	2.19566e-06	0	0	0	2.19566e-06	0	0	0	4.39132e-06	0	0	0	0	0	4.39132e-06	0	0	0	0	0	0	0
50884476	0	0	0	0	8.20112e-05	0	0	4.10056e-06	4.10056e-06	4.10056e-06	0	0	0	0	0	8.61118e-05	4.10056e-06	0	0	4.10056e-06	0	0	2.46034e-05	1.64022e-05	4.10056e-06	0	0	0	0	0	0	1.23017e-05	0	0	0	0	4.10056e-06	0	0	0	0	0	0	4.10056e-06	0	0	0	0	0
55855817	0	0	0	0	1.27778e-05	0	0	0	0	0	0	0	0	0	0	0	0	1.91666e-05	0	0	0	0	6.38888e-06	2.55555e-05	6.38888e-06	0	0	0	0	0	0	0	0	0	0	0	0	0	0	0	0	0	0	0	0	0	0	0	0
60586595	0	2.70212e-06	1.08085e-05	0	5.40424e-06	0	0	0	0	0	0	0	1.08085e-05	5.40424e-06	1.35106e-05	0	2.70212e-06	0	2.70212e-06	0	0	0	5.40424e-06	1.08085e-05	0	0	0	2.70212e-06	0	0	0	2.70212e-06	0	0	0	0	0	0	0	0	0	0	0	0	0	0	0	0	0
[truncated: 206 more columns]
