# Supplementary material for: Mapping imported malaria in Bangladesh using parasite genetic and human mobility data
Source: eLife journal article supplement (doi:10.7554/elife.43481), 2019-04-01
Supplement: supp [file elife-43481-supp-v1.zip › elife_poa_e43481_Supplementary_File_6.csv]

Order in barcode	Chromosome	Position	Ref	Nonref
1	2	376222	A	G
2	2	470013	G	A
3	3	656861	T	G
4	4	110442	C	T
5	4	881571	A	G
6	5	350933	G	A
7	5	369740	T	C
8	6	900278	G	A
9	7	1044052	T	C
10	8	1314831	G	A
11	8	413067	A	G
12	9	900277	A	G
13	11	1018899	T	C
14	11	1815412	C	G
15	13	1056452	T	C
16	13	1466422	G	C
17	14	137622	T	C
18	14	2164225	A	G
19	1	145515	T	A
20	3	548178	C	A
21	4	1102392	A	T
22	4	139051	G	T
23	4	286542	G	T
24	4	529500	G	A
25	5	796714	A	G
26	7	1256331	C	T
27	7	461139	G	A
28	7	619957	G	C
29	8	417335	C	T
30	9	163977	C	T
31	10	317581	A	T
32	10	336274	A	G
33	11	1020397	C	T
34	11	1294107	C	T
35	11	1935227	T	A
36	11	477922	C	T
37	12	1663492	A	G
38	12	2171901	T	A
39	13	1233218	T	C
40	13	1867630	G	C
41	13	2377887	C	A
42	14	2355751	T	A
43	14	3046108	C	T
44	2	529709	T	A
45	2	714480	T	C
46	3	155697	A	G
47	4	1037656	A	T
48	4	648101	G	A
49	5	1204155	A	C
50	6	1282691	G	A
51	6	1289212	A	G
52	7	1066698	G	A
53	7	1213486	G	A
54	7	704373	A	G
55	8	1313202	T	C
56	8	339406	A	G
57	8	701557	T	G
58	9	452690	A	G
59	9	599655	G	C
60	10	1383789	A	C
61	10	1385894	C	T
62	11	1006911	A	T
63	11	1295068	G	A
64	11	1802201	G	A
65	12	1667593	T	C
66	12	1934745	G	A
67	12	858501	C	A
68	13	1419519	T	C
69	13	159086	A	G
70	13	2161975	T	A
71	13	2573828	A	C
72	13	388365	A	C
73	14	2625887	C	G
74	14	3126219	C	T
75	14	438592	A	C
76	1	179347	A	G
77	1	180554	G	A
78	1	283144	C	G
79	1	535211	C	T
80	2	839620	T	C
81	4	426436	A	C
82	4	531138	G	T
83	4	891732	A	C
84	5	172801	G	A
85	6	574938	A	C
86	7	1308383	C	T
87	7	1358910	A	G
88	7	1359218	A	T
89	7	635985	T	C
90	8	1056829	C	A
91	8	150033	T	C
92	8	399774	C	T
93	9	1379145	G	A
94	10	1386850	C	T
95	11	1935031	T	A
96	11	408668	T	A
97	11	828596	T	C
98	12	857245	A	G
99	14	107014	G	A
100	14	1757603	A	G
101	14	2733656	C	T
