# Supplementary figures and images for: Mapping imported malaria in Bangladesh using parasite genetic and human mobility data
Source: eLife journal article supplement (doi:10.7554/elife.43481), 2019-04-01

**(A)**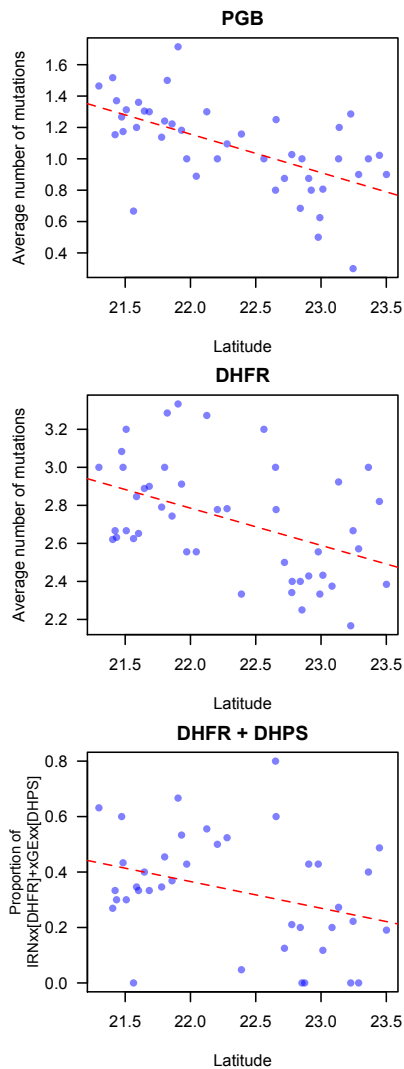**(B)**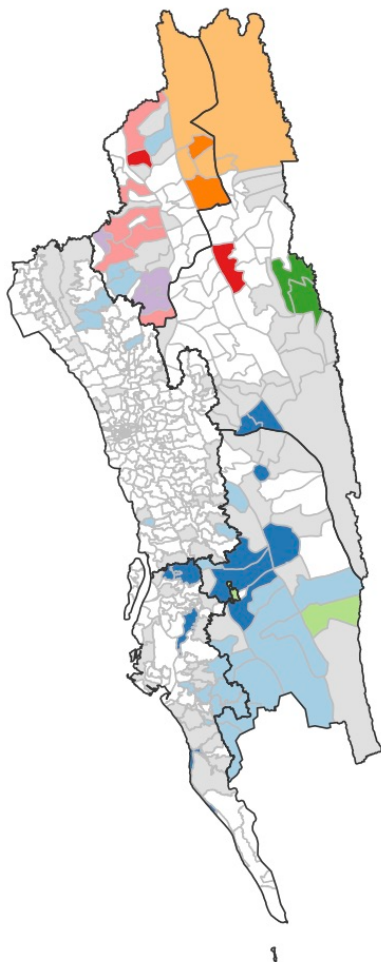

Supplement: supp [file elife-43481-supp-v1.zip]

Probability of geographic distance between  
parasite pairs

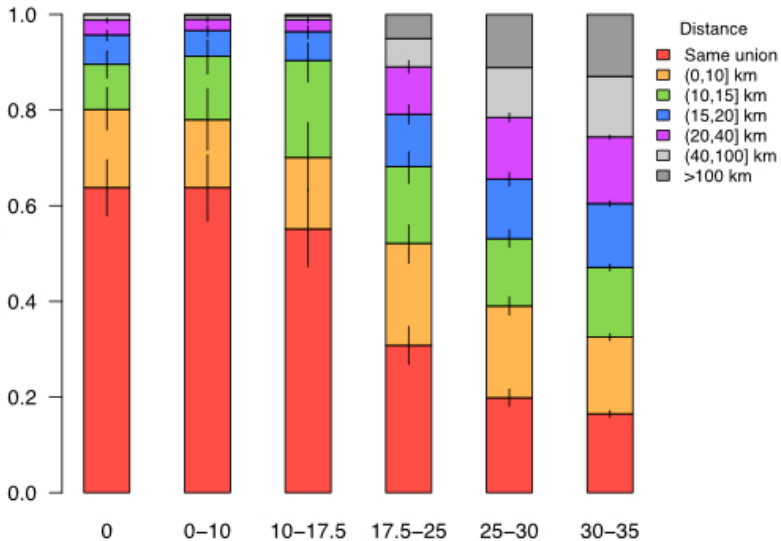

Supplement: supp [file elife-43481-supp-v1.zip]

**(A)**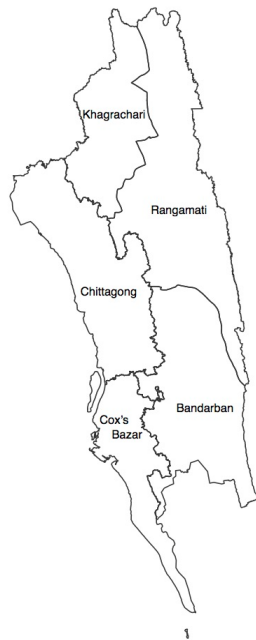**(B)**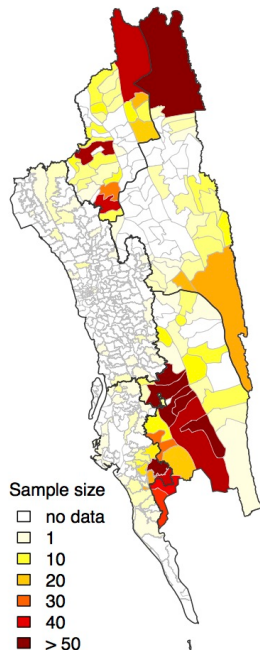**(C)**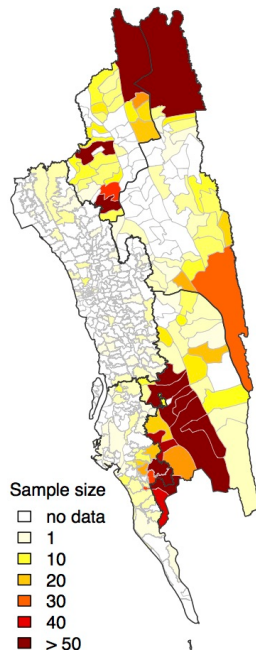**(D)**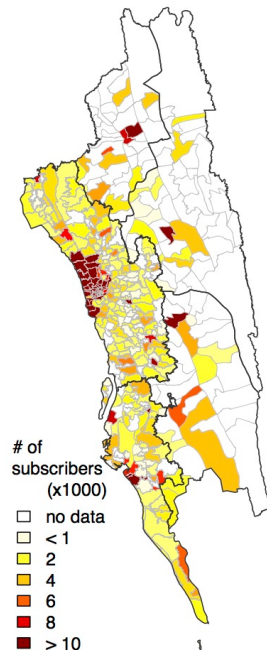

Supplement: supp [file elife-43481-supp-v1.zip › elife_poa_e43481_Figure_1_figure_supplement_1.pdf]

**(A)**

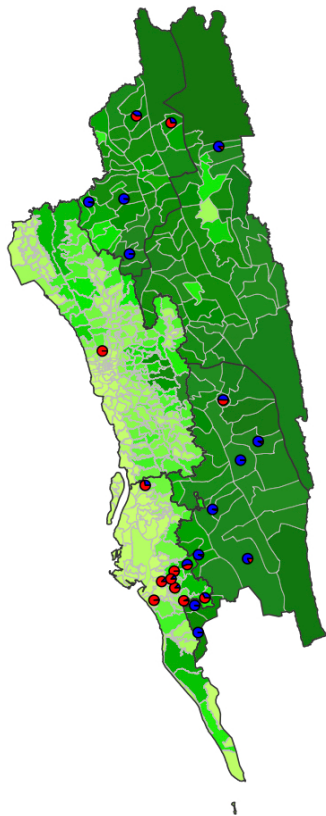

**(B)**

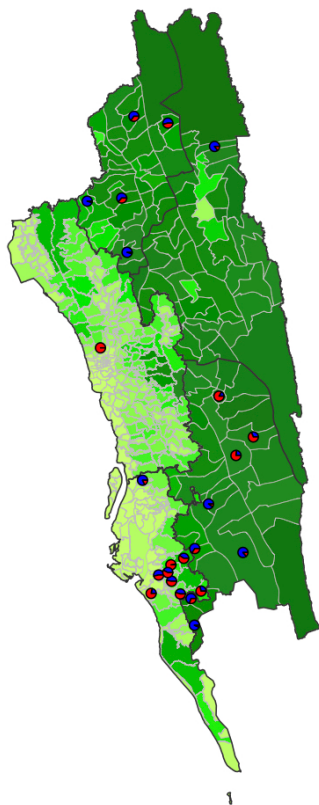

Supplement: supp [file elife-43481-supp-v1.zip › elife_poa_e43481_Figure_4_figure_supplement_1.pdf]

**(A)**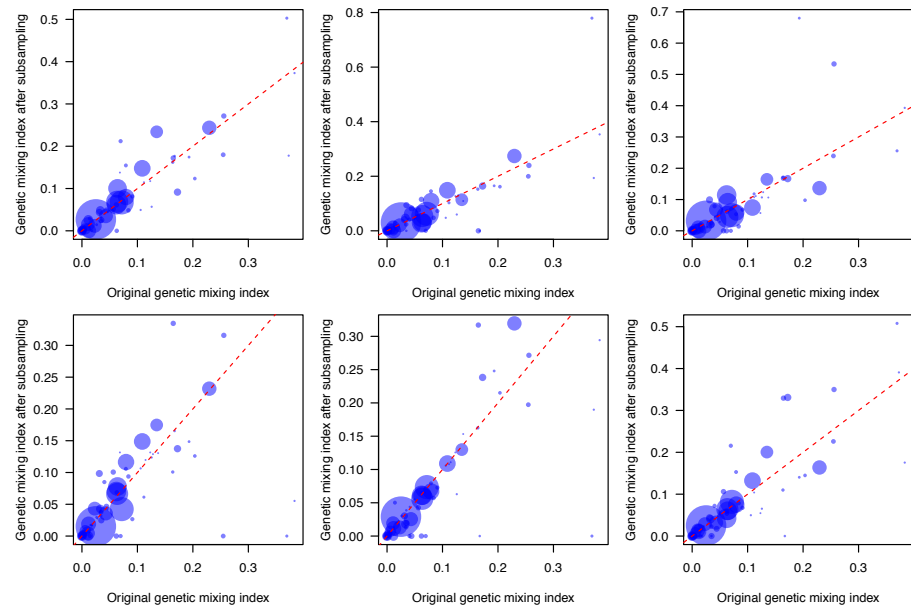**(B)**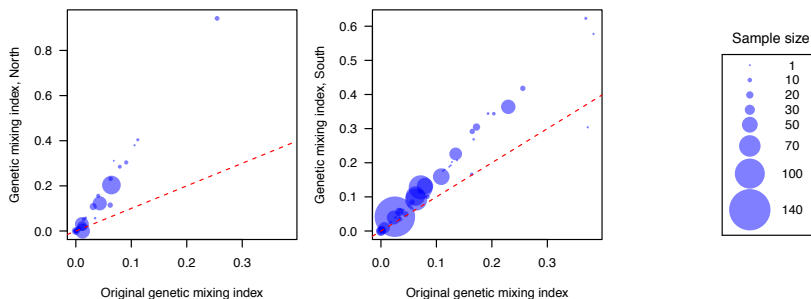

Supplement: supp [file elife-43481-supp-v1.zip › elife_poa_e43481_Figure_3_figure_supplement_2.pdf]

**(A)**

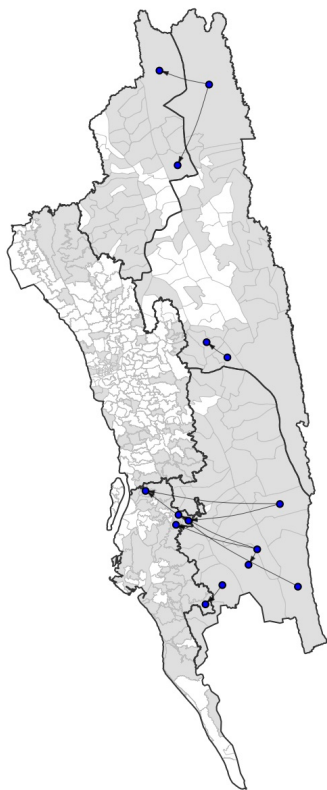

1

**(B)**

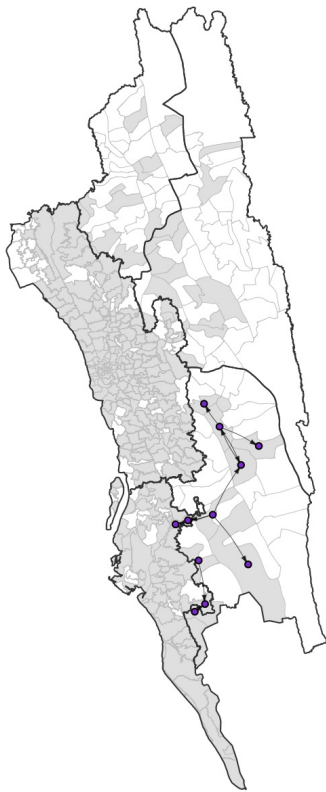

1

Supplement: supp [file elife-43481-supp-v1.zip › elife_poa_e43481_Figure_5_figure_supplement_1.pdf]

**(A)**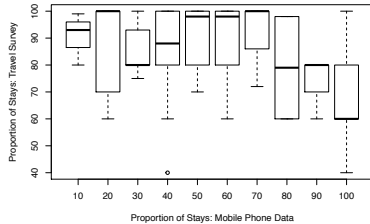**(B)**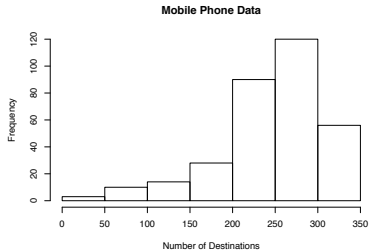**(C)**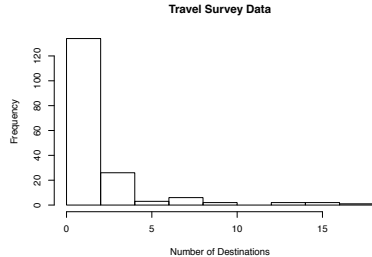

Supplement: supp [file elife-43481-supp-v1.zip › elife_poa_e43481_Figure_2_figure_supplement_3.pdf]

**(A)**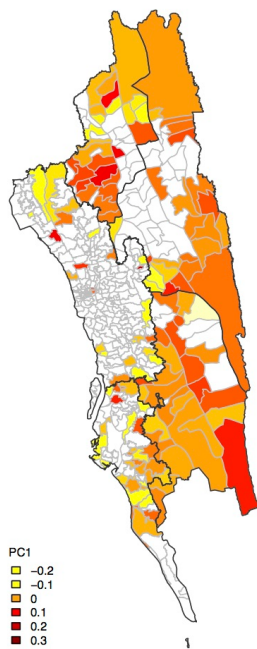**(B)**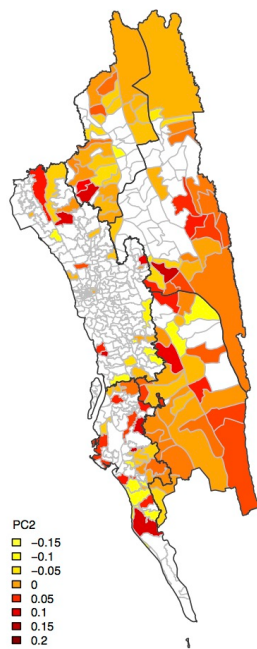**(C)**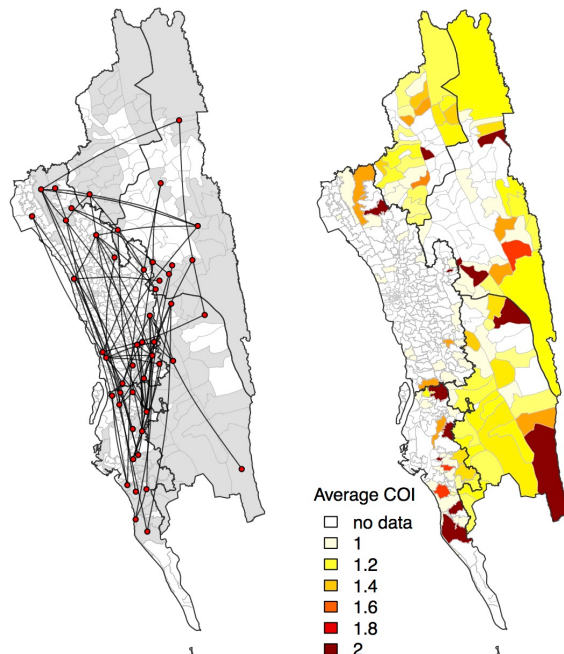**(D)**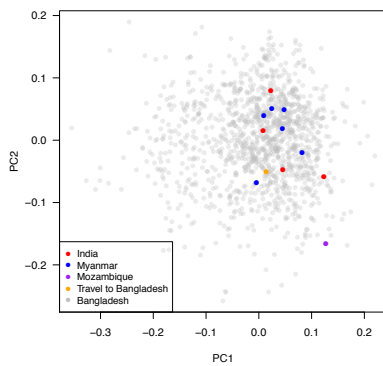**(E)**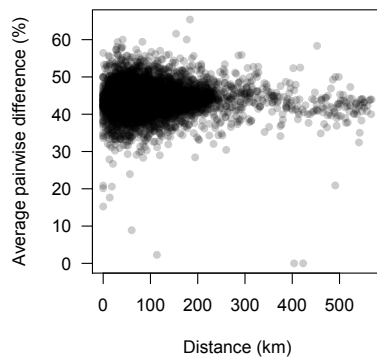**(F)**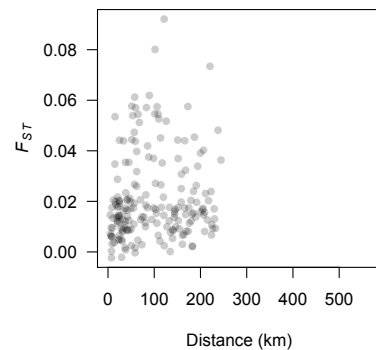

Supplement: supp [file elife-43481-supp-v1.zip › elife_poa_e43481_Figure_1_figure_supplement_3.pdf]

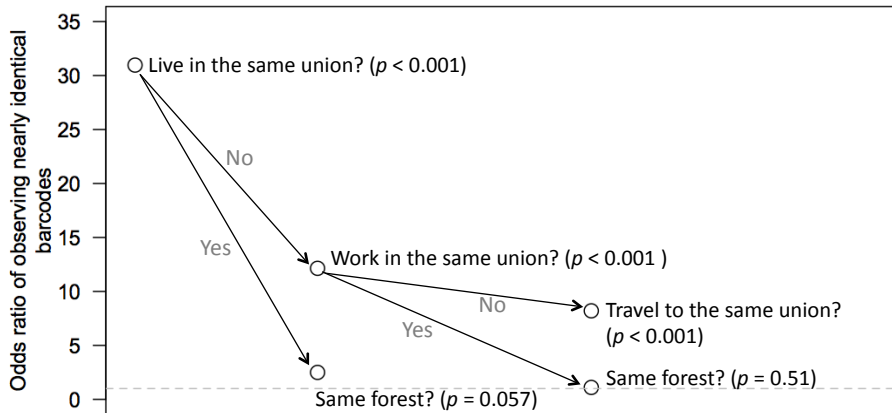

Supplement: supp [file elife-43481-supp-v1.zip › elife_poa_e43481_Figure_2_figure_supplement_2.pdf]

**(A)**

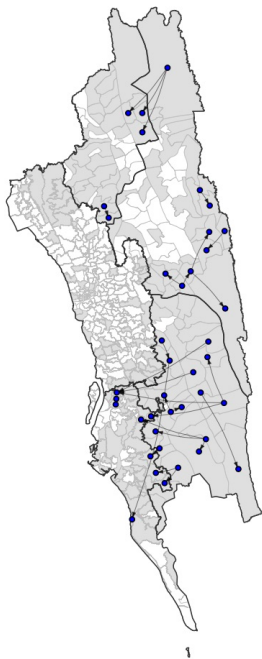

**(B)**

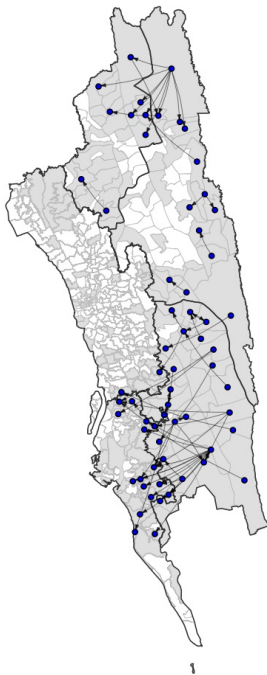

Supplement: supp [file elife-43481-supp-v1.zip › elife_poa_e43481_Figure_5_figure_supplement_2.pdf]

(A)

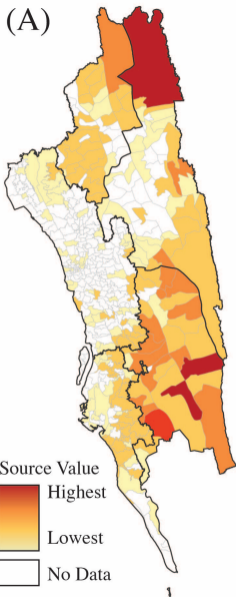

(B)

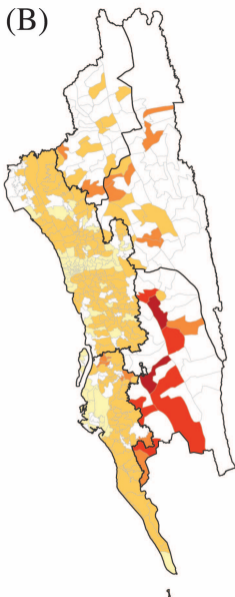

(C)

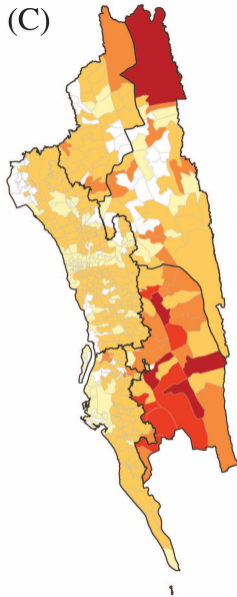

Source Value

Highest

Lowest

No Data

Supplement: supp [file elife-43481-supp-v1.zip › elife_poa_e43481_Figure_4_figure_supplement_2.pdf]

## One source

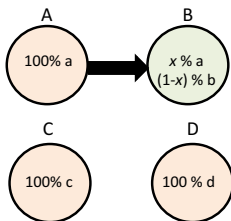

## Three sources

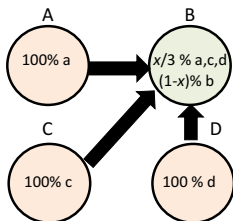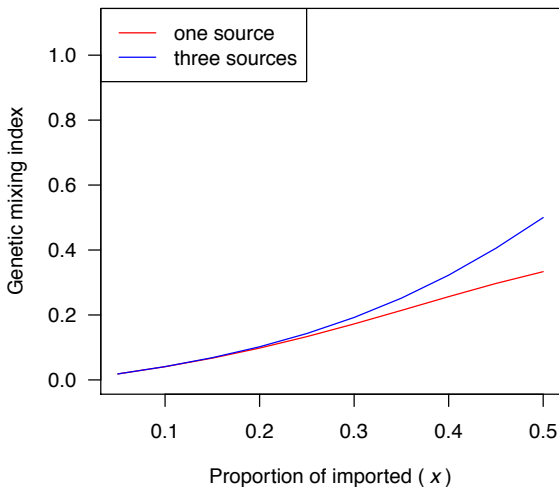

Supplement: supp [file elife-43481-supp-v1.zip › elife_poa_e43481_Figure_3_figure_supplement_3.pdf]
